# Supplementary material for: Ageing transcriptome meta-analysis reveals similarities and differences between key mammalian tissues
Source: Aging (Albany NY). 2021 Feb 11;13(3):3313–41. doi: 10.18632/aging.202648 (PMC7906136; doi:10.18632/aging.202648)
Supplement: Supplementary Table 1 [file aging-13-202648-s002.xlsx]

## Sheet: TableS1
Table S1. List of all datasets used in the meta-analysis. Ages are given as years for humans and months for mice and rats. The 'Min Age' and 'Max Age' columns give the lowest and highest ages included in the study, in months for mouse and rat, in years for humans. The 'Represented Lifespan' column gives the fraction of the given organisms total possible lifespan represented by the given study, ca…
Study	Tissue	Species	Technology	Min Age	Max Age	Represented Lifespan	N	Sex
AgeMap	Adrenal Glands	Mouse	Microarray	1	24	0.479167	40	B
AgeMap	Bone Marrow	Mouse	Microarray	1	24	0.479167	34	B
AgeMap	Brain	Mouse	Microarray	1	24	0.479167	158	B
AgeMap	Eye	Mouse	Microarray	1	24	0.479167	37	B
AgeMap	Gonads	Mouse	Microarray	1	24	0.479167	39	B
AgeMap	Heart	Mouse	Microarray	1	24	0.479167	38	B
AgeMap	Kidney	Mouse	Microarray	1	24	0.479167	40	B
AgeMap	Liver	Mouse	Microarray	1	24	0.479167	32	B
AgeMap	Lung	Mouse	Microarray	1	24	0.479167	40	B
AgeMap	Muscle	Mouse	Microarray	1	24	0.479167	40	B
AgeMap	Spinal Cord	Mouse	Microarray	1	24	0.479167	40	B
AgeMap	Spleen	Mouse	Microarray	1	24	0.479167	40	B
AgeMap	Thymus	Mouse	Microarray	1	24	0.479167	40	B
GDS1079	Myoblasts	Mouse	Microarray	8	23	0.3125	4	F
GDS1278	Muscle	Rat	Microarray	6	30	0.526316	9	M
GDS1279	Muscle	Rat	Microarray	6	30	0.526316	24	M
GDS1280	Oculomotor Nucleus	Rat	Microarray	6	30	0.526316	9	M
GDS1280	Spinal Cord	Rat	Microarray	6	30	0.526316	9	M
GDS1311	Brain	Mouse	Microarray	4	22	0.375	6	M
GDS156	Muscle	Human	Microarray	21	62	0.334694	12	M
GDS1647	Retina	Mouse	Microarray	2	6	0.0833333	9	U
GDS1803	HSC	Mouse	Microarray	2	22	0.416667	8	U
GDS2019	Liver	Mouse	Microarray	6	22	0.333333	7	U
GDS2082	Brain	Mouse	Microarray	2	15	0.270833	23	M
GDS2612	Muscle	Mouse	Microarray	5	25	0.416667	10	M
GDS2639	Brain	Rat	Microarray	4	24	0.438596	20	M
GDS2681	Cochlea	Mouse	Microarray	4	15	0.229167	6	M
GDS287	Muscle	Human	Microarray	21	75	0.440816	15	M
GDS288	Muscle	Human	Microarray	21	75	0.440816	15	M
GDS2912	Brain	Mouse	Microarray	4.5	7	0.0520833	9	M
GDS2929	Lung	Mouse	Microarray	2	26	0.5	9	M
GDS2972	Heart	Mouse	Microarray	5	30	0.520833	10	M
GDS2973	Brain	Mouse	Microarray	5	30	0.520833	10	M
GDS2996	Muscle	Mouse	Microarray	2	10.5	0.177083	6	U
GDS3077	Heart	Rat	Microarray	3	28	0.548246	16	M
GDS3102	Heart	Rat	Microarray	4	28	0.526316	13	M
GDS3102	White Adipose	Rat	Microarray	4	28	0.526316	12	M
GDS3182	Muscle	Human	Microarray	19	59	0.326531	19	U
GDS355	Kidney	Mouse	Microarray	5	30	0.520833	10	U
GDS356	Kidney	Mouse	Microarray	5	30	0.520833	10	U
GDS3620	Brain	Mouse	Microarray	12	24	0.25	8	U
GDS3869	CD4 Cells	Human	Microarray	36	76	0.326531	16	U
GDS3915	Brain	Rat	Microarray	3	23	0.438596	49	M
GDS3939	Brain	Rat	Microarray	3	21	0.394737	12	M
GDS3976	HSC	Mouse	Microarray	2	6	0.0833333	6	F
GDS399	Heart	Rat	Microarray	3	20	0.372807	11	M
GDS40	Heart	Mouse	Microarray	3	12	0.1875	12	B
GDS4019	Brain	Rat	Microarray	3	17	0.307018	15	M
GDS4264	Lymphoblastoid Cell	Human	Microarray	24	63	0.318367	7	F
GDS4522	Brain	Human	Microarray	25	94	0.563265	19	B
GDS4523	Brain	Human	Microarray	25	94	0.563265	23	B
GDS472	Muscle	Human	Microarray	20	71	0.416327	15	F
GDS473	Muscle	Human	Microarray	20	71	0.416327	15	F
GDS4804	Muscle	Mouse	Microarray	2	12	0.208333	10	M
GDS4858	Muscle	Human	Microarray	19	65	0.37551	22	B
GDS4874	Liver	Mouse	Microarray	6	24	0.375	6	U
GDS4892	Muscle	Mouse	Microarray	2	24	0.458333	14	M
GDS4904	Muscle	Mouse	Microarray	2.5	24	0.447917	6	M
GDS4925	Cochlea	Mouse	Microarray	3.5	12.3	0.183333	26	B
GDS520	Brain	Rat	Microarray	4	24	0.438596	29	M
GDS5204	Brain	Human	Microarray	24	106	0.669388	41	B
GDS5216	Muscle	Human	Microarray	25	78	0.432653	36	B
GDS5217	Muscle	Human	Microarray	23	85	0.506122	15	F
GDS5218	Muscle	Human	Microarray	24	84	0.489796	27	B
GDS5226	Adipocyte	Mouse	Microarray	6	18	0.25	18	M
GDS5286	Dendritic Cells	Human	Microarray	20	87	0.546939	9	U
GDS5412	Distal Trachea	Mouse	Microarray	2	14	0.25	8	F
GDS707	Brain	Human	Microarray	26	106	0.653061	30	B
GSE11097	Liver	Rat	Microarray	4	24	0.438596	25	M
GSE11291	Brain	Mouse	Microarray	5	30	0.520833	10	M
GSE11291	Heart	Mouse	Microarray	5	30	0.520833	10	M
GSE11291	Muscle	Mouse	Microarray	5	30	0.520833	10	M
GSE12277	HPCCells	Human	Microarray	27	73	0.37551	14	U
GSE12480	Heart	Mouse	Microarray	4	25	0.4375	20	M
GSE16487	Mammary Artery	Human	Microarray	43	83	0.326531	15	M
GSE19676	Muscle	Mouse	Microarray	12	24	0.25	8	U
GSE21681	Brain	Rat	Microarray	18	28	0.219298	18	M
GSE27625	Liver	Rat	Microarray	3	24	0.460526	16	M
GSE32719	Bone Marrow	Human	Microarray	20	84	0.522449	26	U
GSE34272	Brain	Rat	RNAseq	6	28	0.482456	9	M
GSE34378	Brain	Mouse	Microarray	3	32.5	0.614583	18	F
GSE34378	Kidney	Mouse	Microarray	3	32.5	0.614583	18	F
GSE34378	Liver	Mouse	Microarray	3	32.5	0.614583	18	F
GSE34378	Lung	Mouse	Microarray	3	32.5	0.614583	18	F
GSE34378	Spleen	Mouse	Microarray	3	32.5	0.614583	18	F
GSE35322	Tail	Mouse	Microarray	5	30	0.520833	20	B
GSE36192	Brain	Human	Microarray	20	102	0.669388	747	B
GSE39540	Bone Marrow	Human	Microarray	21	84	0.514286	59	B
GSE40645	Muscle	Human	Microarray	35	89	0.440816	29	B
GSE47817	HSC	Mouse	RNAseq	4	24	0.416667	8	U
GSE48911	Brain	Mouse	Microarray	4.5	20	0.322917	12	U
GSE5086	Muscle	Human	Microarray	22	89	0.546939	80	B
GSE53960	Adrenal Glands	Rat	RNAseq	5.25	26	0.455044	16	B
GSE53960	Brain	Rat	RNAseq	5.25	26	0.455044	16	B
GSE53960	Heart	Rat	RNAseq	5.25	26	0.455044	16	B
GSE53960	Kidney	Rat	RNAseq	5.25	26	0.455044	16	B
GSE53960	Liver	Rat	RNAseq	5.25	26	0.455044	16	B
GSE53960	Lung	Rat	RNAseq	5.25	26	0.455044	16	B
GSE53960	Muscle	Rat	RNAseq	5.25	26	0.455044	16	B
GSE53960	Spleen	Rat	RNAseq	5.25	26	0.455044	16	B
GSE53960	Testes	Rat	RNAseq	5.25	26	0.455044	8	M
GSE53960	Thymus	Rat	RNAseq	5.25	26	0.455044	16	B
GSE53960	Uterus	Rat	RNAseq	5.25	26	0.455044	8	F
GSE55163	Muscle	Mouse	RNAseq	6	24	0.375	10	U
GSE56045	CD14 Cell	Human	Microarray	44	83	0.318367	1202	B
GSE56580	CD4 Cell	Human	Microarray	45	79	0.277551	214	B
GSE57110	Brain	Rat	RNAseq	6	28	0.482456	9	M
GSE57809	Liver	Mouse	RNAseq	3	21	0.375	7	U
GSE58137	Blood	Human	Microarray	20	78	0.473469	244	B
GSE61915	Brain	Mouse	Microarray	3	29	0.541667	17	U
GSE63060	Blood	Human	Microarray	52	87	0.285714	104	B
GSE66715	Brain	Rat	RNAseq	6	24	0.394737	12	U
GSE66715	Liver	Rat	RNAseq	6	24	0.394737	12	U
GSE66857	Sabmandibular Gland	Mouse	Microarray	2	12	0.208333	12	U
GSE69187	Aorta	Mouse	Microarray	2	12	0.208333	8	U
GSE69832	Blood	Human	Microarray	24	93	0.563265	42	M
GSE69952	Brain	Mouse	RNAseq	5	15	0.208333	11	U
GSE70657	Bone Marrow HSC	Mouse	RNAseq	2	20	0.375	135	U
GSE73450	Spleen	Mouse	Microarray	2	25	0.479167	40	M
GSE74283	Skin	Mouse	RNAseq	2	24	0.458333	12	U
GSE74463	Kidney	Mouse	Microarray	4.5	24	0.40625	9	F
GSE77131	Fibroblasts	Human	RNAseq	23	85	0.506122	17	B
GSE78702	Muscle	Rat	RNAseq	8	24	0.350877	58	M
GSE7958	Brain	Mouse	Microarray	3	18	0.3125	6	B
GSE80465	Brain	Mouse	RNAseq	6	24	0.375	9	U
GSE85084	Brain	Mouse	Microarray	3	24	0.4375	24	U
GSE87404	Muscle	Mouse	RNAseq	3	22	0.395833	6	U
