# Supplementary material for: Ageing transcriptome meta-analysis reveals similarities and differences between key mammalian tissues
Source: Aging (Albany NY). 2021 Feb 11;13(3):3313–41. doi: 10.18632/aging.202648 (PMC7906136; doi:10.18632/aging.202648)
Supplement: Supplementary Table 2 [file aging-13-202648-s003.xlsx]

## Sheet: TableS2.TauData
Gene	Adipose Tissue	Adrenal Gland	Blood Vessel	Bladder	Brain	Breast	Blood	Skin	Cervix Uteri	Colon	Esophagus	Fallopian Tube	Heart	Kidney	Liver	Lung	Salivary Gland	Muscle	Nerve	Ovary	Pancreas	Pituitary	Prostate	Small Intestine	Spleen	Stomach	Testis	Thyroid	Uterus	Vagina	Tau
ENSG00000223972	0	0	0	0	0	0	0	0	0	0	0	0	0	0	0	0	0	0	0	0	0	0	0	0	0	0	0.846468	0	0	0	1
ENSG00000227232	3.53486	3.17819	3.67431	3.99359	3.41524	3.79295	3.28062	3.90163	4.1252	3.76333	3.6871	4.19355	2.36498	3.57827	2.57104	3.89073	3.49116	2.79727	4.35632	4.44436	2.58658	4.07543	4.55755	3.77559	4.33175	3.32078	4.16408	4.31894	4.55858	4.10116	0.188596
ENSG00000243485	0	0	0	0	0	0	0	0	0	0	0	0	0	0	0	0	0	0	0	0	0	0	0	0	0	0	0	0	0	0	NA
ENSG00000237613	0	0	0	0	0	0	0	0	0	0	0	0	0	0	0	0	0	0	0	0	0	0	0	0	0	0	0	0	0	0	NA
ENSG00000268020	0	0	0	0	0	0	0	0	0	0	0	0	0	0	0	0	0	0	0	0	0	0	0	0	0	0	0	0	0	0	NA
ENSG00000240361	0	0	0	0	0	0	0	0	0	0	0	0	0	0	0	0	0	0	0	0	0	0	0	0	0	0	0	0	0	0	NA
ENSG00000186092	0	0	0	0	0	0	0	0	0	0	0	0	0	0	0	0	0	0	0	0	0	0	0	0	0	0	0	0	0	0	NA
ENSG00000238009	0	0	0	0	0	0	0	0	0	0	0	0	0	0	0	0	0	0	0	0	0	0	0	0	0	0	0	0	0	0	NA
ENSG00000233750	0	0	0	0	0	0	0.43091	0	0	0	0	0	0	0	0	0	0	0	0	0	0	0	0	0	0	0	0	0	0	0	1
ENSG00000237683	3.11942	3.03913	2.61451	2.66725	1.72224	3.47425	7.65945	3.12857	3.45779	2.44743	4.10823	3.92597	1.65329	2.81446	2.7159	5.4099	3.90808	0	2.30889	4.503	3.19714	4.05852	4.6286	3.5015	6.48296	3.00022	5.82754	4.3208	3.47187	4.13343	0.551418
ENSG00000268903	0	0	0	0.229029	0	0	4.00227	0	0	0	0.353691	0.540736	0	0	0	1.30839	0.230488	0	0	0.644786	0	0.445751	0.957667	0	2.579	0	2.41038	0.587892	0	0.326763	0.908547
ENSG00000239906	0	0	0	0	0	0	3.53782	0	0	0	0.346364	0	0	0	0	1.66933	0.104444	0	0	0.634614	0	0.00239084	0.842492	0	2.32772	0	1.8927	0.632465	0	0.270104	0.914981
ENSG00000241860	0	0	0	0	0	0	0.690098	0	0	0	0	0	0	0	0	0	0	0	0	0	0	0	0	0	0	0	0	0	0	0	1
ENSG00000222623	0	0	0	0	0	0	0	0	0	0	0	0	0	0	0	0	0	0	0	0	0	0	0	0	0	0	0	0	0	0	NA
ENSG00000241599	0	0	0	0	0	0	0	0	0	0	0	0	0	0	0	0	0	0	0	0	0	0	0	0	0	0	0	0	0	0	NA
ENSG00000228463	0.555248	0	0	0	0.0598499	0.278521	0.696012	0	0	0	0	0	0	0	0	0	0	0	0.275871	0.257009	0	0.136791	0	0	0.595291	0	0.620268	0	0	0	0.862327
ENSG00000237094	0	0	0	0	0	0	0	0	0	0	0	0	0	0	0	0	0	0	0	0	0	0	0	0	0	0	1.27642	0	0	0	1
ENSG00000250575	0	0	0	0	0	0	2.56872	0	0	0	0	0	0	0	0	0	0	0	0	0	0	0	0	0	0.858696	0	1.61493	0	0	0	0.966794
ENSG00000233653	0	0	0	0	0	0	0	0	0	0	0	0	0	0	0	0	0	0	0	0	0	0	0	0	0	0	0	0	0	0	NA
ENSG00000224813	0	0	0	0	0	0	0	0	0	0	0	0	0	0	0	0	0	0	0	0	0	0	0	0	0	0	0	0	0	0	NA
ENSG00000235249	0	0	0	0	0	0	0	0	0	0	0	0	0	0	0	0	0	0	0	0	0	0	0	0	0	0	0	0	0	0	NA
ENSG00000269732	0	0	0	0	0	0	0	0	0	0	0	0	0	0	0	0	0	0	0	0	0	0	0	0	0	0	0	0	0	0	NA
ENSG00000256186	0	0	0	0	0	0	0	0	0	0	0	0	0	0	0	0	0	0	0	0	0	0	0	0	0	0	0	0	0	0	NA
ENSG00000236601	0	0	0	0	0	0	0	0	0	0	0	0	0	0	0	0	0	0	0	0	0	0	0	0	0	0	0	0	0	0	NA
ENSG00000236743	0	0	0	0	0	0	0	0	0	0	0	0	0	0	0	0	0	0	0	0	0	0	0	0	0	0	0	0	0	0	NA
ENSG00000236679	0	0	0	0	0	0	0	0	0	0	0	0	0	0	0	0	0	0	0	0	0	0	0	0	0	0	0	0	0	0	NA
ENSG00000231709	0	0	0	0	0	0	0	0	0	0	0	0	0	0	0	0	0	0	0	0	0	0	0	0	0	0	0	0	0	0	NA
ENSG00000235146	0	0	0	0	0	0	0	0	0	0	0	0	0	0	0	0	0	0	0	0	0	0	0	0	0	0	0	0	0	0	NA
ENSG00000239664	0	0	0	0	0	0	0	0	0	0	0	0	0	0	0	0	0	0	0	0	0	0	0	0	0	0	0	0	0	0	NA
ENSG00000230021	0	0	0	0	0	0	0	0	0	0	0	0	0	0	0	0	0	0	0	0	0	0	0	0	0	0	0	0	0	0	NA
ENSG00000223659	0	0	0	0	0	0	0	0	0	0	0	0	0	0	0	0	0	0	0	0	0	0	0	0	0	0	0	0	0	0	NA
ENSG00000225972	8.44497	8.98773	7.09805	2.89409	7.9045	8.33157	6.31478	7.88928	8.71711	8.16988	7.65407	9.20153	8.99635	9.07812	7.64908	7.61713	8.17383	8.70274	7.71591	7.8089	7.30713	6.10546	7.92221	8.88959	8.03849	8.57556	8.16042	7.63198	7.68419	7.70267	0.152443
ENSG00000225630	10.0732	10.0932	8.70998	8.85979	10.4082	10.0453	6.94876	9.20505	8.26262	9.81303	9.45694	8.85107	10.4361	10.1533	9.72496	8.98934	9.28764	9.82837	9.37607	8.82494	8.61491	9.21466	9.80634	9.89872	8.72838	10.0085	9.49675	9.33481	9.04586	8.76457	0.108448
ENSG00000237973	7.70299	9.29153	7.26595	5.81825	8.03126	7.61504	6.25744	7.85424	7.95967	8.23073	7.78791	9.18093	9.31287	8.69494	8.7666	7.53385	8.24987	8.60609	7.28063	7.45706	6.8785	5.4722	7.55688	9.25178	8.09436	8.64963	7.19657	7.84245	7.66697	7.65212	0.163759
ENSG00000229344	4.84321	5.97826	3.93716	3.74242	5.72266	4.72982	3.74358	4.65039	2.94286	5.30428	4.97111	3.63783	5.58716	4.86938	5.43246	4.77901	3.87603	5.32592	4.38452	3.17229	3.54248	4.22434	5.30928	5.92755	4.54487	5.20308	4.92606	4.69321	3.3596	3.42724	0.245485
ENSG00000240409	4.63323	4.90344	3.83979	3.5892	5.09316	4.69713	2.84548	4.14682	3.36085	4.55412	4.23135	3.52311	5.5631	5.58596	5.23386	4.06713	4.0948	5.02569	4.20139	3.63969	3.32156	3.91631	4.86985	4.95918	3.717	4.73741	4.12992	4.58663	3.69325	3.74816	0.241185
ENSG00000248527	11.8085	12.4379	10.9816	11.3899	12.5753	11.8156	9.7448	11.2678	10.7378	11.9709	11.5968	11.201	12.9407	12.7038	12.4351	11.146	11.409	12.2868	11.1786	11.0142	10.5613	11.331	12.0613	12.0427	11.2671	12.1171	11.5356	11.5997	11.122	11.0786	0.108887
ENSG00000198744	5.66016	6.20944	4.92304	3.7866	6.64125	5.71401	3.59975	5.17512	3.40788	5.77025	5.36169	4.19828	6.96438	6.86294	6.129	4.78379	5.50498	6.17788	4.94017	4.30539	4.14973	4.93389	5.71025	5.97762	5.05651	5.77118	5.35013	5.49013	4.37146	4.90738	0.252997
ENSG00000268663	0	0	0	0	0	0	0	0	0	0	0	0	0	0	0	0	0	0	0	0	0	0	0	0	0	0	0	0	0	0	NA
ENSG00000185097	0	0	0	0	0	0	0	0	0	0	0	0	0	0	0	0	0	0	0	0	0	0	0	0	0	0	0	0	0	0	NA
ENSG00000229376	0	0	0	0	0	0	0	0	0	0	0	0	0	0	0	0	0	0	0	0	0	0	0	0	0	0	0	0	0	0	NA
ENSG00000224956	2.64543	2.26217	2.36592	2.87312	1.28109	2.76456	3.5743	2.72311	2.62656	2.56964	2.48986	2.99668	0.891122	2.45709	2.16745	2.71631	2.13531	0.623278	3.21607	3.34457	1.55224	3.37267	3.47679	2.71843	3.43551	2.15634	5.29389	3.55877	2.99585	2.71174	0.513414
ENSG00000235373	0	0	0	0	0	0	0	0	0	0	0	0	0	0	0	0	0	0	0	0	0	0	0	0	0	0	0	0	0	0	NA
ENSG00000223181	0	0	0	0	0	0	0	0	0	0	0	0	0	0	0	0	0	0	0	0	0	0	0	0	0	0	0	0	0	0	NA
ENSG00000240618	0	0	0	0	0	0	0	0	0	0	0	0	0	0	0	0	0	0	0.0194087	0	0	0	0	0	0	0	0.206188	0	0	0	0.996754
ENSG00000229905	0	0	0	0	0	0	0	0	0	0	0	0	0	0	0	0	0	0	0	0	0	0	0	0	0	0	0	0	0	0	NA
ENSG00000228327	1.34403	0.856606	1.16934	1.88625	0.327663	1.6243	0.985583	1.53948	1.5811	1.04841	1.0904	1.90898	0	0.486869	0	1.30169	1.48656	0.193946	2.16093	2.39422	0.47082	1.83275	1.41529	1.21972	0.945667	0.97165	3.34112	2.06699	1.79189	1.43203	0.633272
ENSG00000237491	0	0	0	0	0	0	0	0	0.166271	0	0	0.499111	0	0	0	0	0	0	0.637287	0.186872	0	1.20611	0.0560295	0	0.0260971	0	1.99387	0.337074	0.391847	0	0.939354
ENSG00000230092	0.193314	0	0.237242	0.484162	0	0.392603	0	0.744614	0.268598	0	0	0.817682	0	0	0	0.193204	0.363139	0	0.845823	0.256526	0	0.245207	0.562401	0.432163	0.528278	0	1.01565	0.640063	0.449044	0.274676	0.730808
ENSG00000269831	0	0	0	0	0	0	0	0	0	0	0	0	0	0	0	0	0	0	0	0	0	0	0	0	0	0	0	0	0	0	NA
ENSG00000240453	0	0	0	0	0	0	0	0	0	0	0	0	0	0	0	0	0	0	0	0	0	0	0	0	0	0	0	0	0	0	NA
ENSG00000177757	0.649519	0.420307	0.693647	0.142253	0	0.159965	0	0	0	0	0	0.489367	0	0	0	0	0	0	0.413551	0	0	0	0	0	0	0	0.670261	0.103791	0	0	0.848427
ENSG00000225880	2.33554	2.02123	3.26742	2.88129	2.23726	2.47504	1.5052	2.39551	3.48871	2.67191	2.5434	3.02097	1.39411	2.51748	1.78316	2.99481	2.48614	1.24946	3.70238	3.98536	0.661342	3.37712	3.85609	2.51497	3.0213	1.93646	3.1559	3.45099	3.80306	3.62528	0.339188
ENSG00000228794	3.16675	2.07275	3.39482	3.29895	3.14066	2.97468	0.86872	2.07912	2.91446	2.94591	2.88099	2.88488	3.93834	1.55453	2.0781	2.66939	1.89798	3.69903	2.61249	2.81375	1.28657	4.20907	3.11139	2.33761	2.24535	2.29435	3.05401	2.76782	3.17052	2.60633	0.371143
ENSG00000230368	0	0	0	0	0	0	0	0	0	0	0	0	0	0	0	0	0	0	0	0	0	0	0	0	0	0	0	0	0	0	NA
ENSG00000234711	0	0	0	0	0	0	0	0	0	0	0	0	0	0	0	0	0	0	0	0	0	0	0	0	0	0	0	0	0	0	NA
ENSG00000269308	0	0	0	0	0	0	0	0	0	0	0	0	0	0	0	0	0	0	0	0	0	0	0	0	0	0	0	0	0	0	NA
ENSG00000272438	0	0	0	0.593028	0	0	0	0	0	0	0	0.0852498	0	1.20124	0	0	0	0	0	0	0	1.1092	1.82376	0	1.01097	0	0.941666	0	0	0	0.906571
ENSG00000230699	0	0	0	0.261745	0	0	0	0	0	0	0	0	0	0.366567	0	0	0	0	0	0	0	0.409283	1.08096	0	0.410199	0	0.1804	0	0	0	0.948061
ENSG00000241180	0	0	0	0	0	0	0	0	0	0	0	0	0	0	0	0	0	0	0	0	0	0	0	0	0	0	0	0	0	0	NA
ENSG00000223764	0.925545	2.52474	3.13414	3.55884	0	1.13858	0	0.803936	1.84678	1.8308	2.22763	3.5163	1.65046	3.3873	0.89868	2.00017	0	0	2.37479	1.21111	0	4.56886	4.87354	2.04437	4.21348	1.72976	2.24105	2.51081	3.10386	2.87364	0.601539
ENSG00000187634	1.67798	3.00701	3.5282	4.29972	1.06108	1.67338	0	1.5328	3.83532	2.83066	2.83261	5.16844	2.41435	4.00989	1.57113	2.80797	0.171377	0	2.90812	2.65743	0.443225	5.75787	4.96297	2.99202	4.76025	2.61751	3.33582	3.09494	4.2624	3.99393	0.530175
ENSG00000268179	0	0	0	0	0	0	0	0	0	0	0	0	0	0	0	0	0	0	0	0	0	0	0	0	0	0	0	0	0	0	NA
ENSG00000188976	5.73506	5.29055	5.92262	6.19237	5.27767	5.89918	5.22858	6.50333	6.23573	5.6979	6.04035	6.22632	4.80718	5.24882	5.00381	5.90143	5.68533	5.98092	6.19424	6.04351	4.99993	5.86477	6.03831	5.58141	5.96757	5.50725	6.63314	6.08815	6.30887	6.18142	0.128449
ENSG00000187961	3.40847	3.18692	3.75465	4.28059	3.38503	3.70927	3.01778	4.07571	4.394	3.66375	4.07275	3.92517	2.06906	3.60152	2.7155	4.10622	3.72151	1.39938	3.29956	2.19576	2.44179	4.53699	4.25327	3.8188	4.60786	3.4885	4.99731	4.07042	4.29497	4.31047	0.283713
ENSG00000187583	0	1.28427	0	4.74917	0	1.99731	0.0678575	5.65448	4.10193	0	4.9949	1.43888	0	1.60007	0	1.40358	4.16681	0	0	0	0	0	2.97511	0.638059	1.27698	0.858101	0.591523	0.842898	0	5.5159	0.765195
ENSG00000187642	0	0	0.304824	2.81701	0	0.712512	0	3.82908	2.47855	0	3.44671	0.879941	5.64199	0.432926	0	0	3.20183	7.07871	0	0	0	0	1.91735	0	0	0	1.84537	0	0.333292	3.79806	0.845874
ENSG00000272512	2.58637	0	4.23639	3.69277	1.75143	2.6288	0	2.00723	3.03705	1.73563	1.52493	3.73101	2.40418	1.27879	0.0745595	2.45773	1.89419	1.05423	2.83426	1.91629	1.73873	3.29174	3.21711	1.01999	1.62442	1.02081	0.62589	2.13594	2.99689	3.07701	0.533126
ENSG00000188290	4.79266	1.91666	6.43059	5.35813	4.3121	5.13077	2.62668	3.98156	5.49156	4.77084	4.868	5.52379	4.8037	4.12545	2.27885	5.17053	4.5655	2.54948	5.24046	4.07206	3.17785	5.37058	5.73102	3.69457	4.43198	3.75763	3.50461	4.6343	5.48116	5.28597	0.320873
ENSG00000231702	0	0	0.131721	0.345097	0	0.131029	0	0	0.746109	0	0	1.04983	0	0	0	0	0	0	0	0.584493	0	0	0.159732	0	0	0	0	0	0.53089	0.306174	0.903589
ENSG00000224969	0	0	0	0	0	0	0	0	0.383648	0	0	0.835936	0	0	0	0	0	0	0	0	0	0.0384485	0.314896	0	0	0	0	0	0.404017	0	0.952933
ENSG00000187608	5.96413	4.4633	6.38238	5.31894	5.63114	5.8754	7.99968	5.07477	6.49492	5.71741	5.3467	5.31423	4.74107	7.1109	6.23439	6.59791	4.23913	3.35548	6.24408	4.89038	3.16847	6.19116	5.39629	5.53406	6.54704	5.04384	4.41088	6.0294	5.7393	5.40754	0.316936
ENSG00000188157	4.53533	2.383	4.67988	6.02028	4.39688	5.25139	4.05835	5.08729	5.26969	4.43275	4.67851	5.65625	3.17149	6.42579	3.95451	5.7854	5.61001	1.47125	4.66291	3.86509	4.80393	4.53884	5.2874	4.30972	3.9487	4.57957	5.07716	6.66811	4.90972	4.95584	0.308045
ENSG00000217801	0	0	0	2.13015	0.961349	1.09877	2.03862	1.07823	2.62432	0.0752641	2.42654	1.36763	0	2.14271	0.446866	1.04524	2.27389	0	0	0	0.635959	1.98174	1.06559	0.858524	1.24423	0.997068	1.86655	1.58717	0	2.93443	0.648097
ENSG00000273443	0	0	0	0	0	0	0.507478	0	0.0575467	0	0	0	0	0	0	0	0	0	0	0	0	0	0	0	0	0	0	0	0	0	0.99609
ENSG00000237330	0	0	0	3.45897	0	0.222759	0	1.9318	3.86136	0.00230411	3.94341	0	0	0.0368367	0	0.0763769	2.72396	0	0	0	0	0	0	0	0	1.99094	0	0	0	4.5711	0.862338
ENSG00000131591	3.02075	2.43575	2.99382	3.54254	2.96542	3.62467	2.25283	3.49261	3.70698	3.18413	3.23302	3.84436	1.40668	2.94347	2.11185	3.44352	3.22873	0.57128	3.82647	3.2943	1.61131	3.15104	3.89083	3.04838	3.64548	3.02284	5.31762	3.80783	3.74308	3.67803	0.424671
ENSG00000223823	0	0	0	0	0	0	0	0	0	0	0	0.0402672	0	0.512621	0	0	0	0	0	0	0	0	0	0.0696225	0	0.480088	0	0	0	0	0.960314
ENSG00000207730	0	0	0	0.804001	0	0	0	0	0	0	0	0	0	0	0	0	0	0	0	0	0	1.00328	0.22635	0	0	0.468742	0	0	0	0	0.948476
ENSG00000207607	0	0	0	0	0	0	0	0	0	0	0	0	0	0	0	0	0	0	0	0	0	0.73759	0	0	0	0	0	0	0	0	1
ENSG00000198976	0	0	0	0.859695	0	0	0	0	0.942608	0.734255	0	0.109427	0	0.411465	0	0	0.331378	0	0	0	0.0759433	1.89734	1.05948	1.13325	0	1.67247	0	0.0133067	0	0	0.866542
ENSG00000272141	0	0	0	4.59267	0	2.37482	0	3.01241	4.01227	5.00621	3.75812	4.40792	0	4.61742	0.0316439	2.67353	5.17947	0	0	0	4.17037	5.86199	5.34282	5.39706	0	5.68012	0.86815	4.16106	0	3.38013	0.596076
ENSG00000205231	0.0618962	0	0	0	0	0	0	0	0	0	0	1.75039	0	0	0	0.327077	0	0	0	0	0	0	0	0	0	0	2.92268	0	0	0	0.974759
ENSG00000162571	0.762585	0	0	0	0	0.890844	0	0	1.57562	0	0	4.51662	0	0	0	2.49932	0	0	0	0	0	1.86655	0	0	0	0	6.25236	0	0	0	0.933203
ENSG00000186891	1.36304	0	0	1.25005	1.2588	1.90915	3.97125	4.55428	4.29348	2.05917	1.75464	1.59677	0	0.52543	0	2.83105	2.92351	0	0	0	0	3.02777	2.13868	3.21752	3.67077	1.32422	1.17136	1.35291	0	2.33087	0.667078
ENSG00000186827	3.84292	0	1.60493	1.8236	0.00192531	3.62503	3.58075	0.748585	1.83515	2.08701	1.11968	1.78265	2.32207	1.92025	0	4.10661	1.86286	1.05771	1.42238	1.25167	0.0760603	2.01503	3.12008	3.36562	4.84511	1.82051	0.198078	3.566	1.7333	1.43109	0.62051
ENSG00000078808	7.13802	7.01828	7.66456	7.2543	6.33688	7.16232	6.25999	7.37934	7.53474	7.08247	6.83523	7.39035	6.51032	6.69967	6.82411	7.36101	6.94022	5.8561	7.2572	7.49082	6.13824	7.27839	7.26824	7.20026	7.22739	6.91343	7.37432	7.49809	7.50256	7.1883	0.0825636
ENSG00000176022	3.91883	3.74057	3.85853	3.95504	3.68607	4.06125	2.81701	4.39165	4.27847	3.48588	3.548	4.44057	2.88522	3.4536	3.37768	3.96763	3.45988	2.97937	4.22642	4.00133	3.17729	4.27612	4.09561	3.47101	4.35722	3.47992	3.76615	4.2254	4.4732	3.78529	0.15846
ENSG00000184163	1.61007	0	1.19336	0.965423	0.434039	1.6368	0.449625	3.09564	1.30047	2.73624	1.29122	1.48741	0	2.50299	0.435054	1.63143	0.241866	0	1.12498	1.05439	0	0.940382	1.0342	3.94164	0.75988	0.84169	2.9222	1.45228	1.16474	1.39509	0.705169
ENSG00000260179	0	0	0	0	0	0	0	0.150775	0	0	0	0.0690343	0	0	0	0.433589	0	0	0.163268	0.0935236	0	0	0	0	0	0	0	0	0.0174648	0	0.960707
ENSG00000160087	4.56499	4.54547	4.67134	4.68063	4.17883	4.62512	4.29294	4.98295	4.9173	4.70842	4.80335	5.12958	3.51466	4.27565	3.90137	4.82881	4.46834	4.01892	4.7622	4.8843	3.61681	5.05569	4.92728	4.68537	5.18574	4.54333	6.51858	5.0017	5.16605	4.74039	0.292856
ENSG00000230415	1.89261	2.34955	1.65849	2.31134	3.04945	2.38999	0.166211	1.32863	2.65901	2.42843	2.0996	3.6425	0.853921	1.60744	1.36017	1.78726	1.86375	0.449695	3.2073	3.76761	0.697017	3.89288	2.73296	2.40256	2.56602	1.97604	4.71836	2.84009	3.42963	2.55072	0.532561
ENSG00000162572	2.78896	2.9436	2.05101	2.96893	4.2421	3.20305	1.10035	2.24876	3.86901	3.26167	2.87056	4.65243	1.64398	2.65485	2.74175	2.55163	2.55989	1.06629	4.17951	4.63052	1.39523	4.85842	3.84171	3.26258	3.43623	2.65363	5.9573	3.48096	4.22531	3.64999	0.484649
ENSG00000131584	5.42428	5.36573	5.26701	6.34613	7.48175	5.43061	4.39747	6.4719	6.60542	6.08832	6.18079	6.26488	4.87816	4.97845	4.42142	5.78797	5.65121	4.47681	6.02024	6.29668	4.06441	7.33091	6.20552	5.64201	5.88823	5.38579	4.96166	5.79293	6.7765	6.749	0.238835
ENSG00000169972	3.70776	4.17819	3.74849	4.52687	3.42397	4.01754	3.47692	4.87253	4.79895	3.80235	4.37787	4.60059	2.85086	3.46954	3.28153	4.08138	4.425	2.60517	3.95068	4.23171	3.3622	4.83716	4.50808	3.80478	4.16489	3.86151	4.60373	4.06892	4.72676	4.60593	0.178368
ENSG00000127054	5.62404	5.35806	6.41989	6.50432	5.59556	5.85479	4.98923	5.84582	6.77239	6.21484	6.03345	6.72656	4.63287	5.31812	4.60537	5.90941	5.57609	5.29566	6.258	6.90474	4.89511	6.29624	6.50452	5.84522	6.08169	5.66436	6.69552	6.4302	7.27969	6.43793	0.188626
ENSG00000240731	4.19629	3.82573	5.46008	5.49616	4.31015	4.57594	2.4761	4.45709	5.64577	4.91291	4.71224	5.4863	3.05474	3.82304	2.72405	4.55353	4.47702	3.5805	5.03854	5.78601	3.65198	5.32797	5.19022	4.55279	4.49165	4.20099	4.09407	5.31982	6.17328	5.28283	0.26991
ENSG00000224051	4.62117	4.61728	4.5311	4.81874	4.24127	4.80431	4.04447	5.32734	5.03594	4.92977	5.26613	4.77022	5.18611	4.96832	5.41118	4.59427	5.33718	4.63246	4.66448	4.40698	3.56389	3.85705	5.07472	5.06481	5.11662	5.14208	6.95729	4.84734	4.99339	5.3942	0.309765
ENSG00000169962	0	0	0	0	0	0	0.258862	0	0.222085	0.354299	0.21242	0.570907	0	0	0	0.243735	1.3009	0	0.252852	0.109219	0	1.82211	0	1.94085	2.89221	0	1.10944	0.802096	0.0531978	0.709663	0.881219
ENSG00000107404	5.87712	6.04986	6.17472	6.42605	6.28182	6.00401	4.05608	6.30815	6.52632	6.23535	6.43077	6.57261	5.42872	5.44158	5.2954	6.22766	6.12099	7.29662	7.03565	6.53467	5.49635	6.46255	6.32747	5.75265	5.71637	6.13842	7.12273	6.46389	6.69758	6.54687	0.159968
ENSG00000162576	7.64336	4.81111	7.82163	7.07458	3.79025	7.55552	0.677419	7.6308	8.18498	6.84692	6.21933	7.28474	5.24305	5.80285	3.37467	7.11074	6.20526	4.28462	8.61113	7.94953	3.45876	6.12522	6.96412	6.0877	6.35661	5.899	5.99096	7.3179	8.27765	7.59876	0.28085
ENSG00000175756	6.37288	6.52971	6.30391	6.40201	6.21766	6.4135	6.28949	6.47174	6.29479	6.52994	6.44259	6.34896	6.3651	6.42505	6.28527	6.2343	6.17414	6.70393	6.2645	6.01056	5.44881	6.55819	6.47604	6.23633	6.48461	6.36929	8.48268	6.60334	6.30533	6.21926	0.252915
ENSG00000223663	0	0	0	0	0	0	0	0	0	0	0	0	0	0	0	0	0	0	0	0	0	0	0	0	0	0	0	0	0	0	NA
ENSG00000221978	7.45974	7.29064	7.38994	7.89575	6.63547	7.72416	5.59764	7.41055	8.09966	7.50977	7.46846	8.22951	5.80822	7.06943	6.97072	7.69914	7.33452	5.62859	7.89776	8.47574	6.4586	7.92786	8.17376	7.58997	7.79133	7.09893	6.68493	8.33105	8.45747	7.91633	0.131192
ENSG00000224870	3.64508	4.07393	3.79939	4.16927	3.79918	3.86928	3.56679	3.97758	4.09175	3.89236	3.91386	4.28233	2.72678	3.76722	4.34928	4.04652	4.00738	2.52936	4.41416	3.90049	3.17097	4.22658	4.5654	4.12229	4.75114	3.91392	4.5412	4.6379	4.26541	3.9779	0.170845
ENSG00000242485	6.17582	6.06407	6.46515	6.23048	5.71198	6.28711	5.41664	6.18119	6.2644	6.25013	6.23629	6.42218	5.67121	5.78872	5.41564	6.19275	5.94176	6.27996	6.41056	6.17648	5.20878	6.47775	6.45244	5.90943	6.24289	5.99081	5.84377	6.51376	6.31459	6.1091	0.0675864
ENSG00000272455	1.47288	1.47753	2.31264	2.55922	2.70054	1.76342	1.78145	1.96609	2.81184	2.68538	2.62621	3.39316	0.697261	2.25899	1.75507	2.16998	2.37465	1.17815	2.95974	3.44497	0.950824	3.13812	3.60848	3.01186	3.47879	2.18713	3.52969	3.41622	3.53247	2.49596	0.329832
ENSG00000235098	2.92539	0.0870976	1.25509	5.43542	4.23943	3.91812	0	2.40825	3.79117	3.74481	3.88314	5.6039	1.03186	2.23398	0	4.00871	3.67046	0.302261	4.70861	3.78598	2.89272	1.7543	4.82083	2.92426	1.17194	3.24929	3.64083	2.7945	3.43273	3.65013	0.496894
ENSG00000225905	0.471005	0	0	2.1726	1.77952	1.12846	0	1.07251	1.82199	1.23675	1.0777	3.35906	0	0.134215	0	0.446185	1.04157	0	3.00619	2.60642	0.171247	0	2.39732	0.24525	0	0.712914	1.52774	0	2.10554	1.71195	0.724193
ENSG00000205116	0	0	0	0.302651	4.06264	0	0	0	0	0	0	0.36654	0	0	0	0	0	0	1.40248	0	0	0	0	0	0	0	2.23731	0	0	0	0.963426
ENSG00000225285	1.50658	0	1.18765	3.46056	0	2.35355	0	0.771022	2.36447	3.20891	3.01292	3.73159	0	0.690645	1.04739	1.62477	2.53895	0	3.12073	1.44011	0.86027	0.837087	3.55734	1.6269	0.0708488	2.00545	2.258	0.70135	3.08715	1.96263	0.581436
ENSG00000179403	4.70344	3.13734	4.71074	6.65417	4.2641	5.01717	0	3.8891	5.49004	5.97758	5.97438	5.65682	3.45018	4.87144	5.38421	4.63369	5.40292	1.55016	7.68925	4.26811	4.34415	4.03527	6.86521	4.71079	3.11124	5.01714	4.84019	5.88854	5.59363	5.48973	0.394894
ENSG00000215915	0.662056	0	0.0150324	2.44674	1.19872	1.8839	0	0.141606	1.46704	1.59599	1.45269	2.11945	0	2.07983	1.95948	1.90354	1.36009	0	3.3483	1.35886	1.8021	2.00852	3.0838	0.634104	0	0.198716	1.50866	3.33996	1.94872	1.56513	0.611385
ENSG00000160072	4.53681	4.1186	4.40327	4.65452	3.99442	4.85292	3.93421	4.96784	5.15583	4.5719	4.60642	5.14981	3.15461	4.44469	4.01818	5.02073	4.48748	2.97235	5.14114	5.27844	3.76989	5.50467	5.36864	4.68982	5.28375	4.27843	5.33459	5.35676	5.32581	5.03865	0.161147
ENSG00000197785	4.04121	4.25942	3.94599	4.21674	3.45492	4.13427	3.67601	4.61288	4.44451	4.00041	4.29943	4.44019	3.38369	3.72135	3.93612	4.36306	4.16368	4.11463	4.46646	4.10719	3.54106	5.02524	4.47782	3.98217	4.49123	3.91497	4.71834	4.46511	4.35469	4.27099	0.17658
ENSG00000205090	2.36325	1.55529	3.24057	3.80837	5.32759	2.3842	0	2.06481	4.20004	3.9949	3.63635	3.8138	1.9958	1.17674	0	2.44628	1.28341	0.695167	3.12665	4.63804	0	4.16108	3.63849	2.53781	2.00952	2.56393	2.34562	2.85116	4.87975	3.68469	0.513944
ENSG00000160075	7.02025	6.41415	6.88388	7.00133	6.80437	7.10662	6.81083	7.09147	7.18325	6.9826	7.01785	7.17478	6.21548	6.587	6.07849	7.19235	6.88651	7.28179	6.89063	7.10484	6.02419	7.31191	7.08058	6.87937	7.24309	6.7014	6.814	7.60298	7.18255	7.12612	0.0924995
ENSG00000215014	0	0.422988	0	0	0.357621	0	0	0.0527431	0	0	0	0.293169	0	0	0	0	0	0	0.33673	0	0	1.24928	0	0	0	0	3.1171	0.400367	0	0	0.965564
ENSG00000236684	0	0	0	0	0	0	0	0	0	0	0	0	0	0	0	0	0	0	0	0	0	0	0	0	0	0	0	0	0	0	NA
ENSG00000228594	1.11804	5.19822	0.362685	1.5996	4.32704	1.5179	1.31729	3.84437	2.00102	1.24063	2.65297	1.15526	0.702206	2.27436	0	2.43604	1.93686	0	2.04363	2.10764	0	4.45529	0.97429	1.43078	2.60977	1.89746	4.35365	3.62604	0.406819	2.80287	0.633863
ENSG00000272106	2.9983	3.28155	3.68308	3.80003	4.93084	3.38269	1.95125	3.73546	4.02975	3.45374	3.54579	4.35035	2.66714	3.30619	2.07647	3.70569	3.63005	3.93794	4.31871	4.65725	2.12598	5.96277	4.16532	3.52853	3.68274	2.92681	3.72488	5.34688	4.47774	3.80466	0.391478
ENSG00000197530	4.70848	4.71557	5.19654	5.53749	5.18198	4.89827	4.09006	5.16594	5.7315	5.21356	5.2042	5.73343	4.36898	4.63414	4.02402	5.38582	4.66201	5.51384	5.27265	6.2807	3.76246	6.43022	5.79009	5.04617	5.45684	4.68482	5.71186	5.91193	5.93919	5.59209	0.198747
ENSG00000189409	0	0	1.67571	0.767177	0	0	0	0	2.06552	0	0	1.59903	0	0	0	1.51679	0	0	0	2.93579	0	0.549104	1.41364	0	0	0	0.517032	0	1.49403	1.48402	0.846343
ENSG00000248333	4.51243	4.02575	4.72465	4.91474	4.0604	4.5779	4.21657	4.66863	4.8972	4.90262	4.71136	4.88348	3.41587	3.6922	3.32314	5.17156	4.25171	4.77464	4.84973	4.89911	3.42043	4.65111	4.74017	4.9135	5.20492	4.30781	5.6374	4.89296	5.09837	4.69516	0.196266
ENSG00000272004	0	0	0	0	0	0	0	0	0	0	0	0	0	0	0	0	0	0	0	0	0	0	0	0	0	0	0	0	0	0	NA
ENSG00000189339	4.45744	4.58765	4.60306	4.93108	4.33024	4.89487	4.38575	4.47413	5.22188	4.70817	4.46475	5.05212	2.92374	4.01076	3.39374	4.79402	4.35849	3.48654	4.89201	5.55258	3.66527	5.46307	5.00535	4.97849	5.26998	4.38476	3.84734	5.24536	5.64031	4.95138	0.190959
ENSG00000269737	1.70517	1.04359	1.5885	2.0899	0.7302	2.27626	1.49428	1.66171	2.44772	1.58441	1.35993	2.23555	0	0.798864	0.0337505	2.19821	1.727	0	2.40122	2.72528	0.788812	2.0694	2.1898	2.27944	2.27932	1.33955	1.06262	2.53596	2.68144	2.33638	0.406085
ENSG00000269227	1.36834	0.686976	1.21344	1.64838	0.342857	1.9507	0.955766	1.31088	2.06225	1.19268	1.01499	1.69312	0	0.344418	0	1.8265	1.44455	0	2.0568	2.36134	0.246218	1.50828	1.80025	1.84286	1.78352	0.956558	0.571312	2.12233	2.29646	1.96692	0.471263
ENSG00000215914	0	0	0	0	0	0	0	0	0	0	0	0.246226	0	0	0	0.0363998	0	0	0	0.853491	0	0.659201	0.0515403	0.0564183	0.832957	0	0	0	0.243649	0	0.914089
ENSG00000008128	4.7213	4.31314	4.67838	4.87095	3.98651	4.81486	4.37828	4.73259	4.92889	4.96611	4.68124	4.92871	3.22641	3.99807	3.70256	5.36691	4.46505	4.1956	4.99345	5.0654	3.51341	5.02488	5.03698	5.44139	5.71431	4.5558	5.53995	5.22346	5.36085	4.91819	0.181551
ENSG00000227775	2.45539	2.51477	2.41466	3.44977	2.51171	2.93575	2.19081	2.66397	3.46066	2.86716	2.40619	3.47414	1.01937	2.21562	0.918883	2.82576	2.74569	1.27564	3.05114	3.83993	1.71217	3.49975	3.19255	3.18345	3.36079	2.52356	2.06193	3.58027	3.83867	3.20134	0.303584
ENSG00000215790	1.65255	1.72339	1.8637	2.50057	1.75212	2.11506	1.20352	1.88996	2.63328	1.97414	1.62319	2.49807	0.0716801	1.11392	0.0862962	1.95205	1.81233	0.687064	2.15261	2.79898	0.783854	2.32304	2.20257	2.24948	2.23113	1.69327	1.14034	2.47904	2.97538	2.28743	0.403211
ENSG00000008130	5.82431	6.12355	5.80147	5.41438	3.78421	5.64155	6.90622	4.94913	5.33852	5.24477	5.21261	5.61782	3.6996	4.4828	5.76406	5.78743	5.07496	3.36571	5.57398	5.64862	4.16524	4.95074	5.29962	5.4794	6.6949	5.19106	5.409	5.49482	5.47252	5.08793	0.243088
ENSG00000078369	7.75129	7.21083	8.18087	7.7835	8.04553	7.6344	7.59852	7.74247	7.84166	7.52151	7.416	7.71787	6.11308	6.9513	5.88834	7.98391	7.17033	5.17317	7.84157	7.63358	5.66651	7.56666	7.40779	7.4727	7.51561	6.97627	7.12309	7.51607	7.95648	7.56129	0.107331
ENSG00000231050	0	0.257801	0	0	1.00971	0	0	0	0.21784	0	0	0.0706445	0	0	0	0	0	0.48695	0.298731	0.968323	0	1.79553	0.884213	0	0	0	3.44047	0.842025	0	0	0.931527
ENSG00000169885	0.304452	0	0	0.0869937	0.546831	0.987252	0	0.995509	0.944272	0	0	0.0769499	0	0.0560501	0.93027	0.0647194	1.96919	4.16641	0.230096	0.232141	0.453152	1.1206	2.08254	0	0.606529	0.0858116	2.20486	0.865068	0.594227	1.78278	0.857478
ENSG00000178821	0.91481	5.4703	0	0	1.27219	1.20104	0	1.53292	0.687289	0.796003	0.383674	2.4662	0	0.598225	2.52073	1.4051	2.54567	6.54489	0.324989	1.66818	6.50997	1.13094	0.990995	0.858947	1.71908	2.37576	5.41601	0.20828	0.34798	1.52031	0.763619
ENSG00000142609	0	0	0	0	1.895	0	0	0	0.728858	0	0	4.52497	0	0	0.488905	2.44867	0	0	0	0	0	0.230805	0	0	0	0	4.29742	0	0	0	0.923111
ENSG00000233542	0	0	0	0	4.69102	0	0	0	0	0	0	0	0	0	0	0	0	0	0	0	0	0	0	0	0	0	0.714145	0	0	0	0.99475
ENSG00000187730	0	0.903175	0	0	7.4583	0.198058	0	0	0	0	0	0	0	0	0	1.05715	0	0	0	0	0	2.5417	0	0	0	0	3.57643	1.38207	0.00652997	0	0.955314
ENSG00000226969	0	0	0	0	0	0	0	0	0	0	0	0	0	0	0	0	0	0	0	0	0	0	0	0	0	0	1.44611	0	0	0	1
ENSG00000067606	0	2.46282	0	2.12051	5.32538	1.42445	1.57464	2.49286	1.65983	1.99778	1.96316	1.6364	1.37637	2.52345	1.62388	4.55563	2.57316	0	0	0.966964	1.7081	3.57644	2.63525	3.21166	2.89531	2.00301	5.13215	4.09448	0.441352	2.35519	0.617933
ENSG00000271806	0	0	0	0	0	0	0	0	0	0	0	0	0	0	0	0	0	0	0	0	0	0	0	0	0	0	1.82852	0	0	0	1
ENSG00000182873	1.05897	1.77398	1.84642	2.61132	4.21871	2.05874	2.41729	2.45283	3.34281	2.68157	2.22063	3.21061	0.67814	1.84525	1.32568	4.18336	2.3478	0	1.83516	3.49182	1.05056	4.19003	3.28111	3.30748	3.32397	1.9825	4.00586	3.94727	3.45815	3.0905	0.403153
ENSG00000162585	3.3795	3.45445	3.87229	3.67528	2.80872	3.51759	2.85564	3.44147	4.28036	3.47107	3.43254	4.14311	2.2256	3.55793	2.6145	3.61532	2.86362	1.61435	3.67975	3.99074	2.1407	4.58995	4.17072	3.09185	3.74094	3.28334	4.20082	4.17053	4.32788	3.83337	0.252835
ENSG00000269554	2.42841	2.57657	2.67369	2.89954	1.38334	2.72229	1.93354	2.67557	3.15279	2.13412	2.17592	3.32158	0.839313	2.06079	1.74675	2.76548	2.15684	1.47213	2.67402	3.071	1.8749	3.7267	3.20121	2.46664	3.02804	2.29319	2.20341	3.1581	3.17858	2.63771	0.343919
ENSG00000203301	0.812213	0.349157	0.617383	0.227091	0	0.672768	0	0	1.29431	0	0	1.71061	0	0	0	0.196579	0	0	0.853298	0.635696	0	1.44307	0.249064	0	0.38713	0	0.813549	0.528909	1.69042	0.695246	0.768869
ENSG00000234396	0	0	0	0	0	0	0	0	0	0	0	0	0	0	0.14519	0	0	0	0	0	0	0.523077	0.189779	0	0	0	0	0	0.89528	0.0851799	0.963671
ENSG00000157933	6.15186	4.45479	7.17522	6.03768	5.99705	6.00562	3.82618	6.04626	6.56026	5.7672	5.98789	6.4409	4.6528	4.57809	4.28824	6.22908	5.40553	4.24252	6.45797	6.37267	3.37829	5.61361	5.90205	5.4281	5.53296	5.12487	5.12513	5.9758	6.721	6.06306	0.229304
ENSG00000116151	0.947871	0.166232	0.940214	1.59477	2.98482	1.9354	0	0.861143	2.74651	1.08239	0.932885	4.35295	0	1.66922	0.00641765	1.89884	0.909875	0	2.76661	3.38994	0.125371	2.78659	2.22154	0.792997	0.485926	0.632424	3.84253	3.72551	2.96578	1.95361	0.648551
ENSG00000272161	0	0	0	0	1.63776	0	0	0	0.191011	0	0	1.24442	0	0	0	0	0	0	0	0.51814	0	0.971971	0.0332514	0	0	0	0.933911	1.24223	0.393385	0	0.883602
ENSG00000269753	0	0	0	0	2.63185	0	0	0	0.909309	0	0	1.83002	0	0	0	0	0	0	0.435358	1.38972	0	1.58771	0.216707	0	0	0	1.5059	2.18422	1.20256	0	0.852451
ENSG00000269896	0.741467	0.49948	0.307439	1.47036	2.89157	1.34234	0	1.02338	2.01669	1.30105	1.12695	2.93409	0	1.78142	0	1.29545	1.19584	0	1.30031	2.25376	0.55423	3.41459	2.55604	1.30683	1.41988	0.557076	3.36386	3.2069	2.05282	1.35066	0.59757
ENSG00000272420	0.203789	0.0241078	0	0.484508	3.92498	0.646512	0	1.08098	1.3007	1.25559	0.906103	1.79047	0	0.967967	0.176836	0.780035	0.50481	0	1.0082	1.35766	0	2.58191	1.65427	1.11802	1.29492	0.426651	0.21582	1.88126	1.54245	1.03344	0.787067
ENSG00000271921	0	0	0	0	0	0	0	0	0	0	0	0	0	0	0	0	0	0	0	0	0	0.985228	0.029584	0	0	0	0	0	0	0	0.998965
ENSG00000271847	0	0.24351	0	0	0	0	0	0	0.147697	0	0	0.500205	0	0	0	0	0	0	0	0	0	1.72743	0.375748	0	0	0	1.4815	1.3871	0	0	0.917442
ENSG00000178642	0	0	0	0	1.0892	0	0	0	0	0	0	0	0	0	0	0	0	0	0	0	0	0.461245	0	0	0	0	0	0.170114	0	0	0.980012
ENSG00000157916	5.83159	6.32172	5.93195	5.97096	5.00286	5.85496	5.25963	6.22228	6.23242	5.87382	5.99156	6.14568	4.64577	5.54737	5.88413	5.97907	5.83796	4.95017	6.13592	6.28937	5.04422	6.1695	6.12091	6.0932	6.33048	5.75059	6.21793	6.26531	6.20283	6.24198	0.0739078
ENSG00000157911	3.85711	4.57329	3.62278	4.03186	3.89438	3.90123	2.50028	3.94435	3.77992	3.35299	3.60786	3.86511	2.55025	3.45968	2.78162	3.4031	3.75478	3.10902	4.37743	4.00103	2.95107	4.22268	4.05627	3.14067	3.3499	3.20958	5.04198	4.02565	3.79508	3.71185	0.283049
ENSG00000149527	0.32473	2.36306	0	5.30978	5.53074	3.95584	2.55362	6.11691	4.04749	0.986344	4.00667	3.00721	0	2.95264	2.76323	2.36656	4.78231	0	0	0	2.57095	4.88599	5.43512	3.17573	3.82237	0.718671	2.38232	3.08206	0	5.43168	0.569001
ENSG00000224387	0	0	0	1.25869	1.64187	0	0	0.733528	0	0	0	0	0	0	0	0	0.620975	0	0	0	0	0.897054	1.54213	0	0	0	0.287812	0	0	1.01587	0.866509
ENSG00000229393	0	0	0	1.29954	1.75811	0	0	0.715914	0	0	0	0	0	0	0	0	0.654256	0	0	0	0	1.03443	1.65515	0	0	0	0.521686	0	0	1.01158	0.864812
ENSG00000157881	3.8256	3.67815	4.01857	4.42052	3.75125	3.9328	3.84095	4.04256	4.31463	4.13048	4.06963	4.20867	3.66207	3.41365	2.94092	4.36758	3.72146	4.22753	4.28045	4.05189	2.36192	4.45119	4.12126	4.04763	4.43783	3.66081	4.17295	4.45019	4.46288	4.11426	0.113628
ENSG00000197921	0	0	1.12416	0.560053	2.78929	0	0	2.3421	0	0	0	0	0.591636	0	0	0	0	0	0.115712	0	0	2.22517	0	0	0	0	1.16816	0.226166	0	0.0183616	0.896506
ENSG00000272449	1.13083	0.466305	1.53831	1.63331	2.60847	1.40525	3.14149	2.70704	1.87464	1.70878	0.668939	1.83309	0	2.77273	1.32655	2.678	0.930345	0	0.957429	0.140286	0.468868	3.31094	1.85147	2.77601	4.00558	1.00273	0.819188	1.90826	1.44316	1.23948	0.618275
ENSG00000238164	1.48353	1.13839	0	2.82859	0	1.91956	2.81822	0	2.73055	3.242	0.435883	1.84966	0	2.41436	1.57308	2.94051	1.71338	0	1.25265	0	0.94478	1.94788	2.74191	4.50222	3.61536	2.1448	0	2.61915	1.04322	1.22343	0.658246
ENSG00000157873	6.51677	6.54661	5.69949	6.62662	3.6744	6.7381	7.1266	5.7124	7.34691	6.79339	6.01202	6.81046	4.25347	6.66932	5.67945	7.38499	6.27683	2.955	6.52741	6.5164	4.21719	6.10407	7.21612	7.31055	7.96315	6.2954	5.07212	6.75248	6.9443	6.8724	0.226388
ENSG00000225931	0	0	0	0	0	0	0.24046	0	0	0	0	0.0269275	0	0	0	0	0	0	0	0	0	0	0	0	0.0923753	0	0	0	0	0	0.982892
ENSG00000228037	1.08153	0	0	0.0204831	0	1.20349	2.46696	0	1.82628	2.16859	0.00306297	1.5603	0	0.172427	0	1.2037	0	0	1.05233	1.38698	0	0	1.23792	2.68105	2.64228	1.46114	0.715355	0.594074	1.71243	1.01729	0.697409
ENSG00000157870	3.77575	4.60698	3.17628	4.712	4.87856	4.15748	3.39698	3.91289	4.27207	4.85706	4.0213	4.75496	2.19125	4.3231	2.47245	4.62345	3.59873	0.19256	4.77837	3.74781	2.37384	4.09275	4.33224	5.0643	4.89651	4.26554	4.07586	4.19629	4.23262	3.98132	0.231285
ENSG00000142606	0	0	0	0.202933	0	0.052785	0	0	0	0	0	0.270418	0	0	0	0.781949	0	0	0.384531	0	0	0	0.110608	1.69469	0	0.655371	5.0469	0.0923345	0	0	0.970992
ENSG00000237058	0	0	0	0	0	0	0	0	0	0	0	0	0	0	0	0	0	0	0	0	0	0	0	0	0	0	0.370757	0	0	0	1
ENSG00000215912	0	0	0	0	0	0	0	0	0	0	0	1.69554	0	0	0	0	0	0	0	0	0	0	0	0	0	0	2.11815	0.268049	0	0	0.968033
ENSG00000233234	0	0	0	0	0	0	0	0	0	0	0	0	0	0	0	0	0	0	0	0	0	0	0	0	0	0	0	0	0	0	NA
ENSG00000231630	0	0	0	0	0	0	0	0	0	0	0	0	0	0	0	0	0	0	0	0	0	0	0	0	0	0	1.54066	0	0	0	1
ENSG00000169717	0	0	0	0	0	0	0	0	0	0	0	0	0	0	0	0	0	0	0	0	0	0	0	0	0	0	8.46042	0	0	0	1
ENSG00000177133	1.25203	0	5.93882	0.54587	3.52802	1.13637	0	0	1.32092	0.981483	0.985072	1.6082	1.76036	5.76459	0	2.01184	0	0	5.6606	1.86501	3.24403	1.88369	0.945113	0.827062	0.815514	6.66663	3.9493	5.68165	1.48002	1.59046	0.716674
ENSG00000142611	1.30797	0	4.92955	0.475953	1.557	1.10774	0	0	1.76098	0.856124	0.830437	1.73428	1.16793	2.16389	0	2.44619	0	0	4.38644	1.71928	2.11244	0.52212	0.634016	0.68833	0.208168	3.62516	0.842187	4.24036	1.51076	1.31246	0.73971
ENSG00000226286	0	0	1.05681	0	0	0	0	0	0	0	0	0	0	0	0	0	0	0	0	0	0	0	0	0	0	1.00882	0	0	0	0	0.967083
ENSG00000272235	0	0	0	0	0	0	0	0	0	0	0	0	0	0	0	0	0	0	0	0	0	0	0	0	0	0	0	0	0	0	NA
ENSG00000130762	1.88565	0	0	4.17687	0.595892	3.37268	0	2.92044	3.3092	4.19782	3.6023	2.34839	0	4.70947	2.57531	3.00809	4.7736	0.0471375	5.22955	1.57085	3.12692	4.85042	4.49532	5.21008	0.737527	4.52389	3.11577	4.72565	0	4.05231	0.486133
ENSG00000272088	0	0	0	0	0	0	0	0	0	0.134695	0	0.325534	0	0	0	0	0.00231538	0	0.398259	0	0	0.647163	0.246528	0.995828	0	0	0	0.587312	0	0	0.91891
ENSG00000162591	5.32366	2.53947	6.78801	4.56532	1.1996	5.29985	2.89149	5.67048	4.77073	4.19528	4.01853	6.22204	2.90261	3.01848	1.96427	5.561	4.96772	1.89859	4.75844	5.18597	2.21932	3.01414	5.76657	4.13351	4.33739	3.79729	3.09573	4.74339	4.53538	5.61646	0.399485
ENSG00000207776	0	0	0	0	0	0	0	0	0	0	0	0	0	0	0	0	0	0	0	0	0	0	0	0	0	0	0	0	0	0	NA
ENSG00000238260	0.653034	0.643059	0.91959	1.43878	2.69222	1.13605	0.994057	0.766316	2.11088	1.57038	1.13076	2.40993	0	1.64828	0	1.4211	1.4601	0	2.50122	2.29107	0	3.00021	2.50363	2.01988	2.73537	0.641491	2.06441	2.63246	3.16943	2.37378	0.523921
ENSG00000158109	6.26777	5.78928	6.58276	6.5358	6.622	6.18707	5.47741	6.43192	6.61589	6.36749	6.3182	6.314	5.15222	5.80851	5.99151	6.042	5.99341	5.68696	6.29047	6.29321	4.87811	6.61577	6.06751	6.34118	5.90616	5.9084	5.62545	6.15027	6.52883	6.43297	0.0803881
ENSG00000116213	4.40974	4.21371	4.42917	4.64648	4.04097	4.51593	4.50101	4.37405	4.761	4.44376	4.4424	4.76242	3.10996	3.93287	3.18449	4.70653	4.25964	3.45	4.90687	4.74934	3.54542	4.97397	4.68457	4.79273	5.2493	4.30309	5.0612	4.91501	4.96211	4.60579	0.161239
ENSG00000078900	0	0	0	0	1.61392	0.919997	2.22202	2.63923	1.69057	0	1.39173	3.74677	0	0	0	1.31509	2.26436	0	0	0	0	0	2.61201	0	0.759748	0	1.1258	0	0	2.66455	0.804715
ENSG00000227589	0	0	0	0	0	0	0	0	0	0	0	0	0	0	0	0	0	0	0	0	0	0.696895	0	0	0	0	0	0	0	0	1
ENSG00000235131	0	0	0	0	0	0	0	0	0	0	0	0	0	0	0	0	0	0	0	0	0	0	0	0	0	0	0	0	0	0	NA
ENSG00000227372	4.0739	3.80834	4.5743	4.52316	3.61642	4.33713	2.45161	3.69649	4.7453	4.25098	4.11324	4.91532	3.22928	3.39538	2.74245	4.21246	3.86069	3.14951	4.82165	5.30959	2.97607	4.50633	4.58073	3.92991	4.35136	3.80135	4.71522	4.94851	5.27608	4.47537	0.233148
ENSG00000162592	0	0	0	0	0	0	0	0	0	0	0	0	0	0	0	0	0	0	0	0	0	0	0	0	0	0	5.54429	0	0	0	1
ENSG00000235169	0.934302	1.14339	1.80485	2.18324	0.221723	1.79864	4.27979	0.732481	2.78606	1.18544	1.04808	1.93449	3.47522	3.04093	2.129	1.97722	3.19354	0	1.46866	3.31461	1.80029	3.97945	2.83909	0.909865	1.82806	2.11855	5.55089	3.43997	2.25012	2.11538	0.627693
ENSG00000130764	5.49757	5.49264	5.95424	6.08522	5.44122	5.66349	4.3805	5.96079	5.98129	5.75437	5.80957	6.1413	5.03065	4.93	4.95213	5.47184	5.49541	6.59109	5.94367	6.17161	4.90635	5.7967	5.87073	5.42309	5.73355	5.43002	5.68363	5.89756	6.18613	5.75052	0.148088
ENSG00000266075	0	0	0	0.161366	0	0	0	0	0.344426	0.00524009	0	0.233222	0	0	0	0	0	0	0	1.23188	0	1.12277	0.763481	0.121183	0.924392	0	2.01522	0.579023	0.809206	0.298937	0.88715
ENSG00000272153	2.07889	2.00393	1.76568	2.40394	1.80556	2.33683	1.1264	2.1949	2.55148	2.39217	2.21672	2.66971	0.787695	1.90577	1.9104	2.35083	2.49707	0.0951187	2.77863	3.24657	2.08197	3.37948	3.17184	2.73268	3.22427	2.27695	4.25666	3.10093	2.98515	2.53897	0.460395
ENSG00000116198	3.46642	3.65572	4.13559	4.11376	3.22007	3.44701	2.43246	3.44167	3.72862	3.54871	3.7417	3.75782	2.18618	3.07956	2.58942	3.54549	3.38716	2.87076	3.98387	3.79949	2.45972	3.86397	3.64945	3.32448	3.38939	3.2109	4.30514	3.82916	3.95463	3.56393	0.204021
ENSG00000169598	2.41597	2.13597	2.39177	2.96729	2.98889	2.58464	1.90777	2.00933	3.19558	2.73884	2.29328	3.244	1.16865	2.16873	1.79536	2.68493	2.38258	0.67101	3.25068	3.78717	2.18156	3.72552	3.03751	3.11789	3.61513	2.39721	1.79343	3.18867	3.57228	2.83572	0.322028
ENSG00000198912	4.23302	3.9072	4.18648	4.36972	3.41897	4.39893	3.98051	4.32768	4.44487	4.29659	4.35549	4.5907	2.72498	3.89568	3.62477	4.46361	4.08542	3.20786	4.50326	4.50343	3.22797	4.00318	4.40921	4.4307	4.93221	3.91461	4.78175	4.89572	4.79104	4.38603	0.158527
ENSG00000236423	0	0	0	0	0	0	0	0	0	0	0	0	0	0	0	0	0	0	0	0	0	0	0	0	0	0	2.89415	0	0	0	1
ENSG00000233304	0	0	0	0	0	0	0	0	0	0	0	0	0	0	0	0	0	0	0	0	0	0	0	0	0	0	0	0	0	0	NA
ENSG00000226374	0	0	0	0	0	0	0	0	0	0	0.26266	0	0	0	0	0	0	0	0	0	0	0	0.903091	0	0	0	2.31158	0	0.369484	0.580516	0.968439
ENSG00000229280	0	0	0	0	0	0	0	0	0	0	0	0	0	0	0	0	0	0	0	0	0	0	0	0	0	0	0	0	0	0	NA
ENSG00000235054	0	0	0	0	0	0	0	0	0	0	0	0	0	0	0	0	0	0	0	0	0	0	0	0	0	0	2.32039	0	0	0	1
ENSG00000227169	0	0	0	0	0	0	0	0	0	0	0	0	0	0	0	0	0	0	0	0	0	0	0	0	0	0	0.606337	0	0	0	1
ENSG00000232596	0	0	0	0	0	0	0	0	0	0	0	0	0	0	0	0	0	0	0	0	0	0	0	0	0	0	0.410947	0	0	0	1
ENSG00000196581	0	0	0	0	2.52431	0	0	0	1.57154	0	0	0.680607	0	1.42478	0	0.314841	0	0	0	2.70465	0.337544	0	0.629479	0	1.30802	0	0.35048	0.0431814	0.20679	0.415129	0.87497
ENSG00000231510	0	0	0	0	0	0	0	0	0	0	0	0	0	0	0	0	0	0	0	0	0	0	0	0	0	0	1.50675	0	0	0	1
ENSG00000260972	0	0	0	0	0	0	0	0	0	0	0	0	0	0	0	0	0	0	0	0	0.498737	0	0	0	0	0	0.906702	0	0	0	0.981033
ENSG00000264341	0	0	0	0	0	0	0	0	0	0	0	0	0	0	0	0	0	0	0	0	0	0	0	0	0	0	0	0	0	0	NA
ENSG00000236948	0	0	0	0	0	0	0	0	0	0	0	0	0	0	0	0	0	0	0	0	0	0	0	0	0	0	0	0	0	0	NA
ENSG00000216045	0	0	0	0	0	0	0	0	0	0	0	0	0	0	0	0	0	0	0	0	0	0	0	0	0	0	0	0	0	0	NA
ENSG00000264101	0	0	0	0	0	0	0	0	0	0	0	0	0	0	0	0	0	0	0	0	0	0	0	0	0	0	0	0	0	0	NA
ENSG00000131697	3.10166	2.29599	2.5948	2.68286	2.64556	3.1485	1.65471	3.42409	3.20225	2.43794	2.40175	3.81417	1.22732	2.39129	0.916306	3.35727	2.348	1.20347	3.75004	3.38208	1.56697	4.60834	2.83836	2.40113	2.71739	2.06252	4.38543	4.45914	3.31143	2.97343	0.411143
ENSG00000266687	0	0	0	0	0	0	0	0	0	0	0	0	0	0	0	0	0	0	0	0	0	0	0	0	0	0	0	0	0	0	NA
ENSG00000069424	3.48033	2.45827	2.80453	3.07129	6.01587	2.90939	6.00702	2.63773	2.49164	2.76794	2.53124	3.41396	2.60418	3.59446	1.9275	5.01385	2.47657	2.37084	3.11881	2.60511	0.619766	4.25787	2.66375	4.31067	5.97707	2.04936	2.628	2.77966	2.90292	2.36334	0.490789
ENSG00000116254	0	1.00475	1.75464	0.000642512	5.19833	0	0	0	0	0.482241	2.49567	0	0	0	0	0	0	0	0	0	0	6.57063	0.793889	0	0	0.439203	5.62399	0	0	0.151559	0.905825
ENSG00000116251	7.79168	6.88432	8.00834	7.85968	6.66561	7.9624	7.07356	7.8903	8.43981	7.66816	7.58664	8.05241	5.97861	7.05009	5.83929	7.42613	7.31892	6.90962	7.83849	9.01928	6.70331	7.01915	7.7238	7.27917	7.28067	7.25755	6.13484	7.74386	8.46551	8.05852	0.182171
ENSG00000226944	0.195278	0.975261	0	1.07088	0.969164	0.559034	0	0	0.480613	0.415159	0.258118	0.694492	0	1.303	0.23167	0	1.50903	0	0.458729	0	1.03386	1.95776	1.1609	0.186776	0	0.737497	0	1.90594	0	0	0.750852
ENSG00000158286	2.94488	3.17314	3.21863	4.85721	3.42925	3.60132	1.53494	2.10182	4.73601	3.94931	4.01227	4.94843	4.95632	4.331	3.19115	2.84225	4.36275	1.04376	3.79193	3.3358	3.16632	4.42525	5.46289	3.87373	2.38493	3.3595	2.47637	4.93312	4.34528	4.41323	0.345175
ENSG00000116237	5.27734	5.28902	5.76672	5.45262	4.55553	5.07486	3.44585	5.4171	5.37548	5.21405	5.2992	5.25561	4.59412	4.65928	3.48842	5.06342	5.03546	5.611	5.25887	4.42819	3.71916	5.58053	5.09087	4.8882	4.23078	4.63641	4.03895	5.31016	5.43809	5.18605	0.151405
ENSG00000225077	0	0	0	0	0	0	0	0	0	0	0	0	0	0	0	0	0	0	0	0	0	0	0	0	0	0	1.36056	0	0	0	1
ENSG00000173673	0	0	0	0	0	0	0	0	0	0	0	0	0	0	0	0	0	0	0	0	0	0	0	0	0	0	0	0	0	0	NA
ENSG00000158292	4.67834	1.24884	2.33299	3.57472	2.64902	4.33252	1.46498	4.02043	4.57874	4.04188	3.55557	4.35227	2.88787	2.17651	2.48058	4.51892	2.35984	0.783593	4.6972	4.35472	0.335903	4.64183	3.78303	5.28826	3.78286	2.47549	2.62073	2.32082	4.56736	4.2184	0.388131
ENSG00000097021	3.03529	3.35098	4.15512	3.62077	5.75515	3.00272	3.57785	4.40466	3.99161	4.36612	4.15023	3.39864	2.17713	4.34792	2.70063	3.9753	3.00482	0.849449	4.27003	3.34736	1.43981	5.76535	3.446	4.44132	3.97436	3.54387	5.22092	2.5587	3.94301	4.24854	0.376188
ENSG00000069812	0	0	0	0	0	0	0	3.69875	3.49314	1.50083	3.56213	1.80984	0	0	0	0.367064	2.07384	0	0	0	0	0	0.863607	0.607985	0	0	1.52346	0	0	4.51278	0.850993
ENSG00000187017	0	1.50443	0	0.0594937	1.37647	2.99415	1.23136	4.88285	4.6914	3.13964	3.06045	4.22812	0	4.53908	5.08188	1.35897	2.47081	0	3.34523	0	0	5.05747	2.85389	4.83971	0.0502431	0	7.09191	0	0	4.08443	0.70413
ENSG00000265392	0	0	0	0	0	0	0	0	0	0	0	0	0	0	0	0	0	0	0	0	0	0	0	0	0	0	0	0	0	0	NA
ENSG00000231868	0	0	0	0	0	0	0	0	0	0	0	0	0	0	0	0	0	0	0	0	0	0	0	0	0	0	1.17219	0	0	0	1
ENSG00000215788	4.38699	3.99292	3.38754	3.61066	6.53159	4.36892	3.68887	5.84357	4.80951	4.22923	4.62549	4.94666	3.07489	3.80736	1.83755	4.12452	3.93971	1.22847	5.93585	4.2453	1.40568	7.05971	4.79936	4.95296	7.02728	2.74399	4.04837	4.20958	4.35591	5.07454	0.407843
ENSG00000171680	4.52331	3.96332	3.48742	3.71441	5.82014	4.44876	0	6.3556	4.64101	3.5084	4.40896	4.33864	3.09664	3.08039	0.621558	3.67091	3.89024	1.3355	5.64821	3.96493	1.37068	6.35449	4.24671	3.59424	6.52903	2.6337	3.65315	3.99087	4.25968	4.82409	0.421967
ENSG00000162408	2.97897	2.8887	2.90134	3.2545	2.66097	3.03135	2.09916	3.36983	3.53005	3.15529	3.13383	3.61144	1.72416	2.24512	2.12239	3.02604	2.72816	2.68698	3.51195	3.60822	2.31962	3.16271	3.28317	3.18205	4.2207	2.83811	3.34458	3.2053	3.79714	3.14187	0.292952
ENSG00000253022	0	0	0	0	0	0	0	0	0	0	0	0	0	0	0	0	0	0	0	0	0	0	0	0	0	0	0	0	0	0	NA
ENSG00000229519	0	0	0	0	0	0	0	0	0	0	0	0	0	0	0	0	0	0	0	0	0	0	0	0	0	0	0	0	0	0	NA
ENSG00000173662	0	0	0	0	0	0	0	0	0	0	0	0	0	0	0	0	0	0	0	0	0	0	0	0	0.0428155	0	3.29872	0	0	0	0.999552
ENSG00000204859	4.41586	4.35282	4.71465	4.90925	3.76454	4.71516	5.06045	4.54414	5.21292	4.50496	4.39087	5.17985	2.99463	4.32775	4.53252	4.96835	4.46382	3.17427	5.29562	5.52417	3.49722	5.20634	5.50459	4.77158	5.49281	4.21575	6.06019	5.45524	5.33589	5.02344	0.228717
ENSG00000162413	5.02644	4.99766	6.21473	6.15026	4.28459	5.23163	4.80008	5.48599	5.49883	5.45606	5.75376	5.41206	4.99313	4.39589	3.64551	4.71387	5.02109	6.66467	5.45812	5.598	4.23784	5.4982	5.66457	4.35932	4.62451	4.9294	4.75297	5.07001	5.79044	5.24354	0.232658
ENSG00000116273	4.45036	3.83162	5.07116	4.86596	3.145	4.63613	3.45968	4.76719	5.40218	4.64018	4.69423	5.14777	2.70172	3.25934	2.69098	4.47831	3.97591	3.14886	4.70832	5.04986	2.57344	4.44934	4.66948	3.81246	3.82515	3.91455	6.4926	4.47271	5.39238	5.00359	0.350785
ENSG00000041988	3.86095	3.77398	4.19213	4.05666	3.4099	4.01915	3.05273	3.71184	4.44364	3.79654	3.76734	4.20186	2.49059	3.35941	2.69161	3.76126	3.28481	3.07515	4.35705	4.3727	2.73424	3.98359	4.2012	3.42613	3.96169	3.39548	4.19504	4.34527	4.64557	4.11633	0.198063
ENSG00000007923	4.03769	4.59464	4.021	4.4068	3.67391	4.15425	3.39876	4.51357	4.3112	4.36726	4.20224	4.40444	3.83322	4.44605	3.4336	4.12597	3.98987	4.09041	4.47224	4.57942	3.1532	3.82444	4.09293	4.29213	4.60966	4.03334	4.50215	4.27954	4.51699	4.25018	0.102324
ENSG00000228750	0	0	0	0	0	0	0	0	0	0	0	0	0	0	0	0	0	0	0	0	0	0	0	0	0	0	2.41583	0	0	0	1
ENSG00000239166	0	0	0	0	0	0	0	0	0	0	0	0	0	0	0	0	0	0	0	0	0	0	0	0	0	0	0	0	0	0	NA
ENSG00000237436	0	0	0	0	0	0	0	0	0	0	0	0	0	0	0	0	0	0	0	0	0	0	0	0	0	0	0.561808	0.286095	0	0	0.98244
ENSG00000171735	2.56792	2.52098	3.73097	3.00087	4.46686	2.78416	1.28396	2.35798	2.76555	3.12005	2.95939	2.80261	2.48905	2.70109	1.60001	3.08273	2.51945	2.21392	3.2044	2.64431	1.02268	3.65648	3.03229	2.42866	3.2413	2.4347	3.47096	3.0895	3.03948	2.67918	0.394432
ENSG00000227950	0	0	0	0	0	0	0	0	0	0	0	0	0	0	0	0	0	0	0	0	0	0	0	0	0	0	0	0	0	0	NA
ENSG00000237365	0	0	0	0	0	0	0	0	0	0	0	0	0	0	0	0	0	0	0	0	0	0	0	0	0	0	0	0	0	0	NA
ENSG00000207056	0	0	0	0	0	0	0	0	0	0	0	0	0	0	0	0	0	0	0	0	0	0	0	0	0	0	0	0	0	0	NA
ENSG00000237402	0	0	0	0	0	0	0	0	0	0	0	0	0	0	0	0	0	0	0	0	0	0	0	0	0	0	1.82708	0	0	0	1
ENSG00000237728	0	0	0	0	0	0	0	0	0	0	0	0	0	0	0	0	0	0	0	0	0	0	0	0	0	0	3.7359	0	0	0	1
ENSG00000225126	0	0	0	0	0	0	0	0	0	0	0	0	0	0	0	0	0	0	0	0	0	0	0	0	2.56151	0	0.846183	0	0	0	0.988609
ENSG00000270171	0	0	0	0	2.50284	0	0	0	0	0	0	0	0	0	0	0	0	0	0	0	0	1.0896	0	0	0	0	1.23788	0	0	0	0.967933
ENSG00000270035	0	0	0	0	1.46279	0.183656	0	0	0	0	0	0	0	0.0350045	0	0	0.133078	0	0.313615	0	0	1.36591	0.109103	0	1.23585	0	0.71421	0	0.15653	0	0.899885
ENSG00000269978	0	0	0	0	2.01388	1.22856	0	0	0.05344	0	0	0.364813	0	1.17489	0	1.05024	0.90884	0	1.53259	0	0	3.28774	0.970798	0	2.17287	0	2.55397	0.485789	1.46286	0.335611	0.828945
ENSG00000049245	7.08077	6.21625	7.31366	6.80206	5.81268	6.83775	5.79991	6.74796	6.87683	6.34946	6.52637	6.79267	5.24986	5.8336	4.42456	6.97074	5.9079	5.62392	7.19935	6.70501	4.17122	6.25332	6.40337	5.98378	6.13927	5.91556	5.88061	6.50795	6.94699	6.66273	0.148393
ENSG00000269925	1.88865	0.888491	1.75146	1.91098	1.93818	1.85905	1.48319	2.17828	2.1291	1.86171	1.90124	2.03218	0.459014	1.32937	0.643257	2.92821	1.63514	0	2.6904	2.872	0.616213	2.42132	2.35692	1.78424	2.24706	1.54978	1.81701	2.58218	2.8021	2.5046	0.386077
ENSG00000049246	4.07572	3.28363	4.45441	4.63857	4.71699	4.11525	0.299272	4.03351	4.66457	4.64738	4.59428	4.45601	2.57505	3.1192	3.4646	3.8181	3.5727	3.16365	5.09895	4.74548	2.5669	5.12246	4.31533	3.2909	2.66677	3.71764	3.95885	4.54503	4.80685	4.57322	0.246195
ENSG00000236266	0.561663	0	0.817877	0.645727	0.327032	0.731847	0	0.820975	1.66736	0.71788	0.884439	0.376973	0	0.190789	0.0034371	0.760436	0	0	1.79918	1.81612	0	2.26346	1.05457	0	0	0	1.08279	1.28758	1.64273	1.62989	0.713297
ENSG00000049247	0	0.885949	0	0	0	0	0.577525	0	0	0	0	0	0	0	0	0	0	0	0	0	0	0	0.473539	0	0.257798	0	0	0	0	0	0.949057
ENSG00000049249	0	0	0	0	0	0	1.25263	0	0	0	0	0	0	0	0	0	0	0	0	0	0	0	0	0	0.634194	0	0	0	0	0	0.982542
ENSG00000270330	0	0	0	0	0	0	0	0	0	0	0	0	0	0	0	0	0	0	0	0	0	0	0	0	0	0	0	0	0	0	NA
ENSG00000116288	7.5463	7.95689	8.00652	7.51978	7.57467	7.6015	6.94298	7.25802	7.69589	7.40038	7.36125	7.66848	7.01132	7.23414	6.8087	7.40335	7.1008	7.76681	8.03362	7.81694	6.36002	7.97472	7.73163	6.94571	7.27058	7.19258	7.25109	7.92173	7.69524	7.28925	0.0758351
ENSG00000200344	0	0	0	0	0	0	0	0	0	0	0	0	0	0	0	0	0	0	0	0	0	0	0	0	0	0	0.913562	0	0	0	1
ENSG00000116285	7.50191	4.64329	8.11567	6.99206	4.22571	7.50611	1.11734	7.07222	6.93893	6.07624	7.72549	6.93539	4.42999	5.84189	7.9985	6.9799	6.58488	7.18411	6.672	7.80828	7.71574	7.15711	6.31106	5.88355	3.42618	7.03794	4.97935	7.45912	6.43336	6.72407	0.220912
ENSG00000238290	0	0	0	0	0	0	0	0	0	0	0	0	0	0	0	0	0	0	0	0	0	0	0	0	0	0	1.61381	0.397153	0	0	0.991514
ENSG00000232848	0	0	0	0	0	0	0	0	0	0	0	0	0	0	0	0	0	0	0	0	0	0	0	0	0	0	0	0	0	0	NA
ENSG00000229305	0	0	0	0	0	0	0	0	0	0	0	0	0	0	0	0	0	0	0	0	0	0	0	0	0	0	0	0	0	0	NA
ENSG00000200975	0	0	0	0	0	0	0	0	0	0	0	0	0	0	0	0	0	0	0	0	0	0	0	0	0	0	0	0	0	0	NA
ENSG00000227634	0	0	0	0	0	0	0	0	0	0	0	0	0	0	0	0	0	0	0	0	0	0	0	0	0	0	0	0	0	0	NA
ENSG00000233645	0	0	0	0	0	0	0	0	0	0	0	0	0	0	0	0	0	0	0	0	0	0	0	0	0	0	0	0	0	0	NA
ENSG00000265414	0	0	0	0	0	0	0	0	0	0	0	0	0	0	0	0	0	0	0	0	0	0	0	0	0	0	0	0	0	0	NA
ENSG00000251977	0	0	0	0	0	0	0	0	0	0	0	0	0	0	0	0	0	0	0	0	0	0	0	0	0	0	0	0	0	0	NA
ENSG00000162426	2.38594	1.46495	3.54303	2.96588	3.85137	2.49076	0	1.48361	3.37077	2.80366	3.15423	3.46603	0.988277	2.69882	0	1.4566	1.05663	0.304445	3.5034	3.111	0	4.24535	3.21874	2.05967	2.03567	1.87011	2.45277	2.02934	3.94903	2.96461	0.474644
ENSG00000252254	0	0	0	0	0	0	0	0	0	0	0	0	0	0	0	0	0	0	0	0	0	0	0	0	0	0	0	0	0	0	NA
ENSG00000142599	6.01196	5.59106	6.40158	6.53536	5.05147	6.16109	4.70855	5.26009	6.61381	6.0626	5.98504	6.41522	5.13831	5.49999	3.62963	5.79798	5.37145	6.46086	5.91887	6.02327	4.10497	5.57614	6.37445	5.56541	5.81993	5.32058	5.9297	6.33654	7.27981	5.91759	0.21567
ENSG00000232912	0.554109	0.268165	0.28224	0.732328	0	0.469664	1.89598	0	0.841688	1.02085	0.490657	1.35288	0	0	0	0.320184	0	0.433737	0.370374	0.393527	0	0	1.1448	0.813914	1.95985	0	3.11769	1.03554	1.1568	0.189462	0.826057
ENSG00000221083	0	0	0	0	0	0	0	0	0	0	0	0	0	0	0	0	0	0	0	0	0	0	0	0	0	0	0	0	0	0	NA
ENSG00000270282	0	0	0	0	0	0	0	0	0	0	0	0	0	0	0	0	0	0	0	0	0	0	0	0	0	0	0	0	0	0	NA
ENSG00000234619	0	0	0	0	0	0	0	0	0	0	0	0	0	0	0	0	0	0	0	0	0	0	0	0	0	0	0	0	0	0	NA
ENSG00000224315	0	0	0	0	0	0	0	0	0	0	0	0	0	0	0	0	0	0	0	0	0	0	0	0	0	0	0	0	0	0	NA
ENSG00000222511	0	0	0	0	0	0	0	0	0	0	0	0	0	0	0	0	0	0	0	0	0	0	0	0	0	0	0	0	0	0	NA
ENSG00000226545	0	0	0	0	0	0	0	0	0	0	0	0	0	0	0	0	0	0	0	0	0	0	0	0	0	0	0	0	0	0	NA
ENSG00000228423	0	0	0	0	0	0	0	0	0	0	0	0	0	0	0	0	0	0	0	0	0	0	0	0	0	0	0	0	0	0	NA
ENSG00000229716	0	0	0	0	0	0	0	0	0	0	0	0	0	0	0	0	0	0	0	0	0	0	0	0	0	0	0	0	0	0	NA
ENSG00000074800	9.36284	8.96806	9.97343	9.4252	9.09511	9.27389	10.5884	10.2299	9.30002	8.97347	9.92659	9.11942	7.65843	9.65887	8.72827	9.67541	9.6243	7.32927	9.58771	9.07169	7.05592	8.69133	8.9597	8.97958	9.25893	8.58759	8.64218	8.98381	9.03463	9.63307	0.14412
ENSG00000236269	0	0	0	0	0	0	0.987747	0	0	0	0	0	0	0	0	0.0232124	0	0	0	0	0	0	0	0	0	0	0	0	0	0	0.99919
ENSG00000230679	0.0288836	0	0	0	0	0.497427	0	0	0	0	0	0.823679	0	0	0	0	0.361219	0	0.126613	0	0	1.58561	0.529837	0	0.225719	0	4.31895	1.57758	0	0	0.954039
ENSG00000201725	0	0	0	0	0	0	0	0	0	0	0	0	0	0	0	0	0	0	0	0	0	0	0	0	0	0	0	0	0	0	NA
ENSG00000238249	0	0	0	0	0	0	0	0	0	0	0	0	0	0	0	0	0	0	0	0	0	0	0	0	0	0	0	0	0	0	NA
ENSG00000232208	0	0	0	0	0	0	0	0	0	0	0	0	0	0	0	0	0	0	0	0	0	0	0	0	0	0	0	0	0	0	NA
ENSG00000232663	0	0	0	0	0	0	0	0	0	0	0	0	0	0	0	0	0	0	0	0	0	0	0	0	0	0	0	0	0	0	NA
ENSG00000131686	0	0	0	0	0	0	0	4.03139	0	0	0	0	0	0	0	0	0	0	0	0	0	0	0	0	0	0	0	0	0	0	1
ENSG00000265141	0	0	0	0	0	0	0	0	0	0	0	0	0	0	0	0	0	0	0	0	0	0	0	0	0	0	0	0	0	0	NA
ENSG00000197241	0	0	0	0	0	0	0	0	0	0	0	0	0	0	0	0	0	0	0	0	0	0	0	0	0	0	0	0	0	0	NA
ENSG00000142583	2.90873	1.59903	0.821994	0.175824	2.43767	2.62304	3.68028	0.658534	1.60398	1.60529	0.769736	1.60652	0	1.48549	0	0.387289	1.20457	3.77063	2.60444	1.47616	0	1.90701	3.39527	5.47364	2.50625	0	5.45787	0.0525465	0.865452	2.15555	0.699127
ENSG00000252404	0	0	0	0	0	0	0	0	0	0	0	0	0	0	0	0	0	0	0	0	0	0	0	0	0	0	0	0	0	0	NA
ENSG00000180758	2.0175	2.49375	2.1209	2.7128	0	2.27183	2.08197	4.56659	3.56291	1.80448	4.21386	2.70667	2.54544	1.5379	2.85073	3.64718	3.73789	3.99927	2.51967	3.0703	1.56903	1.51767	2.88304	2.1408	2.16922	1.81039	2.17919	2.84755	2.65339	4.49933	0.439975
ENSG00000207865	0	0	0	0	0	0	0	0	0	0	0	0	0	0	0	0	0	0	0	0	0	0	0	0	0	0	0	0	0	0	NA
ENSG00000228526	0	0	0.0392942	0.0413577	0	0	0	0	0.086932	0	0	0	0	0	0	0	0.8358	0	0.243661	0.955747	0	0	0.716024	0	0	0	0	0	0	0	0.929174
ENSG00000234546	0.334499	2.08209	1.32171	1.99358	0	1.01553	0.323914	2.14218	2.02161	0	0.959697	1.86564	0	0	0	1.1825	1.87628	0	1.53022	2.53822	0.304615	1.35135	2.65387	0	0.570432	0.142762	3.27293	1.42864	1.3706	1.72386	0.676197
ENSG00000049239	5.75762	5.56893	5.40518	5.3707	3.01123	5.61127	4.03531	5.8295	5.85504	4.75398	4.8898	6.25499	4.007	4.04749	6.25831	5.58286	5.39788	5.31046	5.78814	6.79015	3.99631	4.80594	5.46181	4.93851	4.92664	4.86574	4.49275	5.24084	6.06541	5.26877	0.24435
ENSG00000252841	0	0	0	0	0	0	0	0	0	0	0	0	0	0	0	0	0	0	0	0	0	0	0	0	0	0	0	0	0	0	NA
ENSG00000171621	5.99711	3.00081	6.33532	4.89786	2.64746	5.3728	0.959009	5.0123	5.70879	5.04679	5.56884	5.56695	3.50725	4.08743	4.95851	5.5701	4.52618	4.91248	5.07802	5.47147	4.1714	4.13619	5.11601	5.31266	2.56456	4.43364	4.28945	5.3642	6.18089	5.23818	0.266851
ENSG00000252956	0	0	0	0	0	0	0	0	0	0	0	0	0	0	0	0	0	0	0	0	0	0	0	0	0	0	0	0	0	0	NA
ENSG00000235263	0	0	0	0	0	0	0	0	0	0	0	0	0	0	0.205922	0	0	4.01581	0	0	0	0	0	0	0	0	0	0	0	0	0.998232
ENSG00000171612	3.0597	1.65221	1.97413	2.29703	3.37512	3.07637	1.60863	2.25252	2.02966	2.35281	2.32629	2.76116	1.81901	2.48948	3.10002	2.4383	2.88654	3.67316	2.79994	2.39182	0.93329	3.40407	2.70456	1.98177	1.99557	2.49883	4.85779	3.09272	2.34238	2.03417	0.493517
ENSG00000231181	0	0	0	0	0	0.584283	0	0	0	0	0	0.138346	0	0	0.419362	0	0.313936	0	0.0490593	0.363774	0	0.495338	0	0	0	0	0.532707	0.669066	0	0	0.850703
ENSG00000188807	2.43733	2.36062	1.94287	2.49744	2.74814	2.58805	1.59687	2.73968	3.11547	2.43349	2.52949	3.19488	2.5055	2.44042	0.639011	2.38441	2.38124	4.29862	3.4374	3.63431	1.37101	4.18341	2.95648	2.17947	2.58975	1.91661	3.84369	2.91806	3.4762	2.76961	0.391858
ENSG00000171608	3.40481	1.93634	3.31659	3.24246	2.48464	2.97774	6.86031	2.49966	3.35562	3.05182	3.0971	3.7219	1.3027	2.99853	1.35265	4.63038	2.70589	0	3.31003	3.91356	1.1228	2.50533	3.20834	4.8169	6.49244	2.51241	3.23578	3.63837	3.6837	3.39636	0.558103
ENSG00000179840	0	0	0	0	0	0	2.29269	0	0	0	0	0	0	0	0	0	0	0	0	0	0	0	0	0	0.651051	0	0	0	0	0	0.990208
ENSG00000233268	0	0	0	0	0	0	0	0	0	0	0	0	0	0	0	0	0	0	0	0	0	0	0	0	0	0	0	0	0	0	NA
ENSG00000231789	0.42766	0.438119	0.0175623	0.589415	0	1.40771	2.5023	0.828071	1.80657	0.272334	0.46685	1.19165	0	1.86601	0	1.02654	1.53319	0	0	2.82615	1.21725	2.43175	1.9438	0.649867	1.3693	0.336833	0.919352	3.01024	1.76965	1.5756	0.663064
ENSG00000171603	5.71259	5.50987	6.57316	6.50491	7.58576	6.0928	4.43362	6.898	7.22698	6.35707	6.24507	6.88219	4.98739	5.88874	2.70093	6.05709	6.83425	4.20543	6.7926	7.19166	5.28508	7.01337	6.75585	6.07027	5.73379	5.48183	5.31488	6.50074	7.66514	7.05831	0.208714
ENSG00000271264	0	0	0	0	0	0	0	0	0	0	0	0	0	0	0	0	0	0	0	0	0	0	0	0	0	0	0	0	0	0	NA
ENSG00000178585	4.6137	3.43643	3.90053	4.21483	5.01129	4.78983	2.92684	7.87698	5.41127	3.70289	5.5906	4.17587	4.18821	3.84078	2.79138	5.15752	5.57338	2.95323	4.36793	4.36619	3.60072	4.81793	5.05096	3.74352	3.38787	4.35069	5.32302	5.15634	4.10383	5.97245	0.446138
ENSG00000162441	3.80478	3.55072	4.16281	4.16423	3.57404	3.79166	3.0614	4.07882	4.34799	3.91911	3.77752	3.96387	3.1143	3.09154	2.67278	3.60337	3.54016	3.11118	4.12233	4.41835	2.38373	3.81619	3.74692	3.75958	3.23421	3.21966	5.36849	3.8397	4.29046	4.12817	0.317283
ENSG00000228150	0	0	0	0	0	0	0	0	0	0	0	0	0	0	0	0	0	0	0	0	0	0	0	0	0	0	0	0	0	0	NA
ENSG00000173614	2.12938	2.7597	2.01741	2.48538	1.47772	2.11461	2.07594	2.57209	2.29842	2.61217	2.4362	2.30764	2.33036	2.26432	1.78461	2.02764	2.2711	2.91188	2.3202	1.90315	1.10343	2.28876	2.30373	2.63793	2.41789	1.84684	2.56119	2.94642	2.35392	2.27084	0.240639
ENSG00000202415	0	0	0	0	0	0	0	0	0	0	0	0	0	0	0	0	0	0.558138	0	0	0	0	0	0	0	0	0	0	0	0	1
ENSG00000265521	0	0	0	0	0	0	0	0	0	0	0	0	0	0	0	0	0	0	0	0	0	0	0	0	0	0	0	0	0	0	NA
ENSG00000162444	8.36991	3.46851	4.98087	3.57235	3.1145	8.52965	4.53601	4.63449	4.47495	3.76905	4.66106	3.79532	4.74044	4.73131	1.70964	3.4424	4.39076	2.91563	5.54356	3.97719	2.28325	4.36286	4.3885	3.48117	6.8171	3.72355	3.90096	5.57672	4.92072	4.97559	0.493619
ENSG00000225786	0	0	0	0	0	0	0	0	0	0	0	0	0	0	0	0	0	0	0	0	0	0	0	0	0	0	0	0	0	0	NA
ENSG00000130939	4.30372	4.80375	4.8904	5.09868	4.32001	4.28483	3.7027	5.0375	4.80144	4.87447	5.01691	4.60399	3.83762	3.494	3.05161	4.29535	4.31864	4.81342	4.50952	5.09331	3.95424	4.63415	4.56406	4.3245	4.24628	4.49234	4.15158	4.87693	5.2546	4.76927	0.152367
ENSG00000224340	0	0	0	0	0	0	0	0	0	0	0	0	0	0	0	0	0	0	0	0	0	0	0	0	0	0	0	0	0	0	NA
ENSG00000233623	0	0	0	0	0	0	0	0	0	0	0	0	0	0	0	0	0	0	0	0	0	0	0	0	0	0	0	0	0	0	NA
ENSG00000201746	0	0	0	0	0	0	0	0	0	0	0	0	0	0	0	0	0	0	0	0	0	0	0	0	0	0	0	0	0	0	NA
ENSG00000054523	3.53005	3.7656	3.84706	3.8467	5.78569	3.45496	2.92368	3.81223	3.70879	3.86581	4.01063	3.7854	3.25099	2.76598	2.44442	3.78515	3.72596	6.05152	4.46575	4.08572	2.66735	3.95575	3.52253	3.33886	3.04258	3.06352	4.39555	3.75863	4.30904	3.85414	0.391611
ENSG00000264881	0	0	0	0	0	0	0	0	0	0	0	0	0	0	0	0	0	0	0	0	0	0	0	0	0	0	0	0	0	0	NA
ENSG00000199562	0	0	0	0	0	0	0	0	0	0	0	0	0	0	0	0	0	0	0	0	0	0	0	0	0	0	0	0	0	0	NA
ENSG00000265945	0	0	0	0	0.744114	0	0	0	0	0	0	0	0	0	0	0	0	0	0	0	0	0	0	0	0	0	0	0	0	0	1
ENSG00000142657	7.29683	5.9381	5.32117	6.44522	5.35718	6.92874	9.26231	6.41238	6.63154	5.36556	8.08051	5.83701	4.42241	5.67612	5.52136	7.22931	7.43382	4.4698	6.07622	5.9088	4.18621	6.10486	5.60265	6.01818	7.36013	6.02699	7.02724	6.73934	5.29091	7.49373	0.336568
ENSG00000271989	0	0	0	0	0	0	0	0	0	0	0	0	0	0	0	0	0	0	0	0	0	0	0	0	0	0	3.85612	0	0	0	1
ENSG00000175279	2.92954	4.07195	3.05681	4.09132	3.27012	3.12432	2.22112	3.2741	3.45456	3.43615	3.42721	4.0944	1.88776	4.35561	2.53225	3.49008	3.65977	1.79605	3.76342	3.48069	2.73275	5.09042	3.96124	3.24378	2.89299	3.37164	6.87642	4.5502	3.6246	3.3139	0.507569
ENSG00000241563	0.354482	0.481948	0	0.620032	4.17218	0.413724	0	0.103483	0.99013	0.855569	0.406284	1.1876	0	1.3718	0.263114	0.582861	0.402674	0	1.13031	1.03461	0	2.58229	1.54671	0.944623	0.442729	0.348872	4.32192	1.86274	1.08297	0.639123	0.809944
ENSG00000160049	3.74528	3.69441	3.93745	4.37592	3.60235	3.77933	3.19462	4.02183	4.20156	3.90368	4.04675	4.06609	2.76246	3.39026	2.73838	3.81224	3.61873	2.93384	4.0508	4.38445	2.57158	3.73403	3.93559	3.52576	3.56957	3.55792	3.9473	3.93103	4.35254	3.92008	0.159086
ENSG00000142655	4.5813	4.094	4.70233	6.50099	4.40325	4.75016	3.74216	4.6787	4.90637	4.49468	4.70633	4.7195	3.63291	4.10681	4.31747	4.71048	4.33787	3.9201	4.70846	4.78182	2.78026	4.59364	5.6293	4.43903	4.34207	4.03254	4.8712	4.77163	5.0096	4.91402	0.312158
ENSG00000243267	0	0	0	0	0	0	0	0	0	0	0	0	0	0	0	0	0	0	0	0	0	0	0	0	0	0	0	0	0	0	NA
ENSG00000130940	1.75466	0.805076	3.19954	4.32821	0	3.76581	0.908352	5.3613	3.33394	4.46129	3.86195	3.72068	2.95402	2.95295	0.579008	4.31402	4.57571	4.03978	1.38066	1.11811	1.80273	1.97959	4.93053	3.91084	1.53206	4.23454	1.93318	2.81768	3.7236	4.12797	0.465862
ENSG00000272078	0	0	1.00913	1.75803	0	1.60906	0	2.51798	1.22452	1.74021	1.42611	1.26381	0.432439	0.265528	0	2.10303	2.16369	0	0	0	0	0	2.72924	1.16649	0	1.72674	0	0.624066	1.51463	2.15073	0.687974
ENSG00000225158	0	0	0	0	0	0	0	0	0	0	0	0	0	0	0	0	0	0	0	0	0	0	0	0	0	0	0	0	0	0	NA
ENSG00000175262	0	0	0	0	0	0	0	0	0	0	0	0	0	0	0	0	0	2.52733	0	0	1.33689	0	0	0	0	0	0.780231	0	0	0	0.971114
ENSG00000215785	0	0	0	0	0	0	0	0	0	0	0	0	0	0	0	0	0	0	0	0	0	0	0	0	0	0	1.32243	0	0	0	1
ENSG00000264181	0	0	0	0	0	0	0	0	0	0	0	0	0	0	0	0	0	0	0	0	0	0	0	0	0	0	0	0	0	0	NA
ENSG00000207213	0	0	0	0	0	0	0	0	0	0	0	0	0	0	0	0	0	0	0	0	0	0	0	0	0	0	0	0	0	0	NA
ENSG00000120948	6.35293	5.93813	6.75368	6.65266	6.01024	6.54272	5.50751	6.54478	6.87635	6.50011	6.49301	6.78818	5.25851	5.81052	5.42903	6.74199	6.3537	5.91525	7.14972	7.04666	5.07452	6.71093	6.7369	6.52812	6.67304	6.03613	6.4741	7.01643	7.1331	6.77959	0.109302
ENSG00000009724	1.80634	1.05173	2.17917	2.59029	2.29143	2.27674	0.529182	2.4921	2.5969	2.23671	1.88376	3.1126	0.135677	0.778714	6.97239	2.16031	2.04904	1.12673	3.28665	2.834	1.20437	2.35543	2.01315	2.65879	2.35734	1.84134	1.95807	2.29633	2.95061	1.92973	0.708292
ENSG00000271895	4.42249	3.48849	4.61074	4.72177	5.35443	4.90082	3.04981	4.82626	4.97299	4.88416	4.40793	5.65523	2.51393	3.91425	3.16949	4.56173	4.25487	3.55107	5.7641	5.23247	3.39405	5.64317	5.31282	5.0254	5.37337	4.2819	5.30217	5.22709	5.46156	4.61745	0.209543
ENSG00000116649	6.42392	6.09881	6.61689	6.0752	5.75094	6.42064	5.77434	6.65876	6.63426	5.89957	6.13875	6.63075	5.57115	5.1698	5.47684	6.34283	5.71724	6.11888	7.45683	6.53607	6.5763	6.24085	6.21229	5.54781	6.53952	5.8127	5.85893	5.80201	6.59557	6.14147	0.179724
ENSG00000171824	5.75896	4.98989	5.87812	5.66428	5.53825	5.9829	4.96203	5.91563	6.24803	5.52626	5.48987	6.0009	4.03527	4.95255	3.88267	5.86293	5.35702	4.71388	7.0366	6.48498	4.17305	6.00384	5.88215	5.52247	5.84559	5.19733	5.76583	5.88978	6.48889	6.0093	0.215811
ENSG00000226849	2.18044	1.27285	2.01447	2.26974	1.63816	2.69945	0.970212	2.44351	2.81283	1.87706	1.79223	2.53662	0.509489	1.42377	0.808695	2.56103	1.9725	0.320753	3.82061	3.19052	0.671767	2.68298	2.87656	2.20221	2.66845	1.45514	2.36156	2.72299	2.87219	2.7481	0.471502
ENSG00000230337	0	0.236719	0	0	0.770346	0.728515	0	0	0	0	0	0	0	0	0	0	0	0	0.559365	0	0	0.594836	0	0	0	0	3.0138	0	0	0	0.966936
ENSG00000198793	3.76573	3.72378	4.04195	4.17603	3.6828	3.89234	2.80854	3.81899	3.95335	4.03887	4.00768	4.07663	2.97183	3.37378	3.08397	3.91836	3.71539	3.9717	4.31636	3.82544	2.58855	4.10871	4.09394	3.92026	3.99895	3.61806	5.14873	4.24206	4.26816	3.74155	0.26501
ENSG00000225602	0	0	0	0	0	0	0	0	0	0	0	0	0	0	0	0	0	0	0	0	0	0	0	0	0	0	0	0	0	0	NA
ENSG00000253086	0	0	0	0	0	0	0	0	0	0	0	0	0	0	0	0	0	0	0	0	0	0	0	0	0	0	0	0	0	0	NA
ENSG00000271794	0	0	0	0	0	0	0	0	0	0	0	0	0	0	0	0	0	0	0	0	0	0	0	0	0	0	0	0	0	0	NA
ENSG00000171819	4.41215	1.71092	4.6053	2.89688	0.648739	3.26914	0	2.76862	3.85786	3.50563	3.61227	2.27326	2.14799	1.20055	0	1.21431	1.8075	2.58663	10.0904	0.361374	0	3.0687	2.88738	1.7647	0	1.82794	0	0.794947	1.36266	3.45639	0.801649
ENSG00000207451	0	0	0	0	0	0	0	0	0	0	0	0	0	0	0	0	0	0	0	0	0	0	0	0	0	0	0	0	0	0	NA
ENSG00000238173	0	0	0	0	0	0	0	0	0	0	0	0	0	0	0	0	0	0	0	0	0	0	0	0	0	0	0	0	0	0	NA
ENSG00000120942	3.17718	2.99582	3.33695	3.52781	2.21917	3.23805	2.47848	3.49154	3.47108	2.98615	3.00694	3.61639	1.96771	2.20624	2.48957	2.96617	2.96937	3.22591	3.70127	3.7573	2.3178	3.03367	3.15724	2.94491	3.18507	2.87848	3.97647	3.18567	3.68593	3.05925	0.234487
ENSG00000238199	0	0	0	0	0	0	0	0	0	0	0	0	0	0	0	0	0	0	0	0	0	0	0	0	0	0	0	0	0	0	NA
ENSG00000224338	0	0	0	0	0	0	0	0	0	0	0	0	0	0	0	0	0	0	0	0	0	0	0	0	0	0	0	0	0	0	NA
ENSG00000204624	0	0	0	0	1.91744	0	0	0	0	0	0	0	0	0	0	0	0	0	0	0	0	2.05279	0	0	0	0	3.38166	0	0	0	0.959516
ENSG00000235643	0	0	0	0	0	0	0	0	0	0	0	0	0	0	0	0	0	0	0	0	0	0	0	0	0	0	2.0223	0	0	0	1
ENSG00000116661	2.69682	4.95003	3.33823	3.61742	7.71678	4.79729	1.52428	4.32954	3.92197	2.80967	3.73418	3.62662	2.70423	4.46178	4.20765	3.57035	4.40215	1.91293	5.82126	2.89621	5.86099	7.81405	4.82054	3.0898	2.70953	3.65289	4.78833	4.22822	3.02534	4.63584	0.497586
ENSG00000132879	4.06654	4.91222	4.57075	4.95225	6.98046	5.00881	3.95063	5.10373	5.20046	4.41063	4.72879	5.17507	3.72467	5.17543	3.98651	4.7393	4.91157	2.27739	5.83367	5.19882	4.16835	6.64217	5.94507	4.77525	5.36147	4.52837	5.36627	6.02646	5.22881	5.39869	0.301656
ENSG00000116663	3.5131	4.03804	3.42656	4.08685	3.58229	3.6896	4.75701	3.82611	4.11664	3.57709	4.06621	3.91288	2.69399	3.28105	3.68765	4.4557	3.8319	3.79993	3.91896	3.70537	3.30341	3.68909	4.16556	3.46283	4.59438	3.77077	4.75194	3.9699	3.73067	3.81046	0.199302
ENSG00000116670	4.30022	3.6631	4.16596	4.10723	3.9438	4.43041	4.66198	4.43657	4.43569	3.99984	3.97987	4.27533	3.08974	3.94787	4.02512	4.78405	3.93381	4.07339	5.01144	4.40471	3.71474	4.35346	4.31961	3.65164	4.39854	4.12045	6.08257	3.96651	4.55475	4.0601	0.315115
ENSG00000162490	0	0	0	0	0.245495	0	0	0	0	0	0	0	0	0	0	0	0	0	1.08589	0	0	0	0	0	0	0	0	0	0	0	0.992204
ENSG00000177674	5.14963	5.06525	4.96941	4.97415	3.05969	5.29838	7.37608	5.10419	5.1712	4.46036	4.99968	5.74139	3.63104	5.10964	3.42309	5.97337	4.98451	4.29437	5.60144	4.85216	4.55109	4.91989	6.09745	4.26828	6.1881	4.44124	4.81432	5.43179	4.95302	5.29939	0.332289
ENSG00000215910	0	0	0	0	0	0	0	0	0	0	0	0	0	0	0	0	0	0	0	0	0	0	0	0	0	0	5.27883	0	0	0	1
ENSG00000177553	0	0	0	0	0	0	0	0	0	0	0	0	0	0	0	0	0	0	0	0	0	0	0	0	0	0	1.96422	0	0	0	1
ENSG00000177000	3.66154	3.31249	3.71456	3.66646	2.91906	3.55724	2.83428	3.55273	3.7053	3.53738	3.4573	4.26046	3.65372	3.32711	2.63901	4.45793	2.6161	2.88624	4.61397	4.80629	2.295	4.37797	3.77796	3.84185	4.48598	3.58607	3.96382	4.39317	3.82802	3.3268	0.252062
ENSG00000011021	4.37312	4.21813	4.39962	4.39257	4.63724	4.445	3.01361	3.94504	4.83748	4.25427	4.02711	4.58023	3.22277	3.73429	3.16328	4.77764	3.5563	3.15028	5.23818	5.22533	2.64647	5.15535	4.55805	4.33649	4.35634	3.78437	5.27927	4.93705	5.11277	4.44348	0.19972
ENSG00000242349	1.68339	1.95821	1.29711	1.30431	1.58071	2.00211	1.57189	1.41583	2.27855	1.48834	1.17531	2.5256	3.45291	1.36676	1.24178	3.05584	1.86958	0	1.78609	1.9954	1.06368	4.32661	3.67382	2.91852	3.05151	1.47708	5.58192	2.86104	2.12131	1.68281	0.640304
ENSG00000175206	2.53949	1.65806	4.33791	0.898958	2.22953	3.03349	1.89131	2.43585	1.45375	2.32315	2.50474	1.54896	13.9966	1.30245	1.38122	2.99424	2.74735	2.06132	2.88626	2.86462	1.11475	2.84804	2.87531	3.05407	2.4255	1.79698	3.80835	3.2341	2.38182	2.34942	0.830054
ENSG00000120937	0	0	2.14243	0	0.976256	0	0	0	0	0	0	0	11.1773	0	0	0	0	0	0.0341032	0.119826	0	0	0	0	0	0	1.06974	0	0	0	0.986603
ENSG00000224904	0	0	0	0	0	0	0	0	0	0	0	0	0	0	0	0	0	0	0	0	0	0	0	0	0	0	0	0	0	0	NA
ENSG00000199347	0	0	0	0	0	0	0	0	0	0	0	0	0	0	0	0	0	0	0	0	0	0	0	0	0	0	2.0295	0	0	0	1
ENSG00000201801	0	0	0	0	0	0	0	0	0	0	0	0	0	0	0	0	0	0	0	0	0	0	0	0	0	0	0	0	0	0	NA
ENSG00000116685	5.32159	4.97751	6.09974	5.85739	4.30775	5.31948	5.85746	5.80911	5.57416	5.79387	5.58763	5.76223	4.48961	4.949	5.11126	5.39895	5.45244	5.03641	5.4289	5.14887	4.65306	5.74027	5.58106	6.13392	5.77688	5.18035	6.17594	5.68141	5.81855	5.43433	0.121824
ENSG00000083444	6.25738	5.62349	6.47877	6.02061	4.54031	6.11566	5.58531	6.78176	6.58439	5.91672	5.85834	6.65288	5.49777	5.61817	5.81402	6.37942	5.62325	4.69807	6.48767	6.73765	4.63468	5.79651	5.97692	5.3966	5.73472	5.51591	4.72065	6.18399	6.94839	6.11999	0.159559
ENSG00000116688	5.85651	5.51095	6.01305	6.78511	5.94051	5.88138	5.84297	6.50152	6.02995	6.46203	6.82224	5.93573	7.29213	5.31858	5.39017	6.03761	5.67627	7.32093	5.97387	5.85968	4.00547	5.81083	6.17871	5.97402	5.86232	5.96792	5.90714	6.54322	6.22253	6.13209	0.181682
ENSG00000270914	0	0	0	0	0	0	0	0	0	0	0	0	0	0	0	0	0	0	0	0	0	0	0	0	0	0	0	0	0	0	NA
ENSG00000116691	4.64332	3.65674	4.7107	4.69062	4.11483	4.68625	5.68855	4.29669	4.85662	4.4788	4.34117	5.17854	3.27157	3.85798	3.57217	5.2168	3.81508	3.8833	5.85763	5.64997	3.48279	4.23715	4.8803	4.63827	5.68636	4.02036	5.56423	5.18743	5.54974	4.59376	0.220292
ENSG00000202461	0	0	0.422043	0.382008	0	0	0	0	0.127633	0.167968	0	0.405463	0	0	0	0.0409412	0	0	1.01254	1.27082	0	0	0.0976347	0	0	0	0	0	1.57584	0.416321	0.904957
ENSG00000243539	0	0	0	0	0	0	0	0	0	0	0	0	0	0	0	0	0	0	0	0	0	0	0	0	0	0	0	0	0	0	NA
ENSG00000120949	2.73223	0	0	0	0	2.18705	4.75735	0	0	0	0	0.858572	0.0438034	0	0	0.598669	0	0	1.19536	0	0	0	0	0.206169	1.2874	0.13481	1.97629	0	0.735122	0	0.913343
ENSG00000201135	0	0	0	0	0	0	0	0	0	0	0	0	0	0	0	0	0	0	0	0	0	0	0	0	0	0	0	0	0	0	NA
ENSG00000227875	0	0	0	0	0	0	0	0	0	0	0	0	0	0	0	0	0	0	0	0	0	0	0	0	0	0	0	0	0	0	NA
ENSG00000028137	6.75619	4.124	5.03699	4.87296	3.36661	6.52162	8.92206	4.33754	5.46704	4.76684	4.40956	5.53432	4.02886	4.27575	4.95213	6.80021	4.1836	3.59895	6.19525	4.45547	2.40441	4.5044	4.74893	5.99604	7.60095	4.57791	2.74087	4.72526	5.29498	4.9674	0.454104
ENSG00000263676	0	0	0	0	0	0	0	0	0	0	0	0	0	0	0	0	0	0	0	0	0	0	0	0	0	0	0	0	0	0	NA
ENSG00000225196	0	0	0	0	0	0	0	0	0	0	0	0	0	0	0	0	0	0	0	0	0	0	0	0	0	0	0	0	0	0	NA
ENSG00000252969	0	0	0	0	0	0	0	0	0	0	0	0	0	0	0	0	0	0	0	0	0	0	0	0	0	0	0	0	0	0	NA
ENSG00000048707	3.92085	2.99237	4.47052	4.06609	3.31105	3.92189	1.99251	4.54326	4.27352	3.73518	4.11646	3.89263	3.23602	2.95642	2.14335	4.02277	3.78094	3.67567	4.47203	3.91162	2.34836	3.44596	4.08043	3.45148	3.43108	3.52018	3.63516	4.72583	4.08591	4.2448	0.228901
ENSG00000239149	1.63027	0	1.92585	1.56724	0	1.80839	0	2.34458	2.75689	0.649794	1.44699	0.829409	0.365824	0.454305	0	2.20075	1.17729	0	2.40852	1.659	0.196144	1.20925	2.35522	0.539162	0.904197	0.497918	0.708729	2.60801	1.70857	2.47842	0.578812
ENSG00000229484	0.378221	0	0	0	0	0	0	0	0	0	0	0	0	0	1.35951	0	0	0	0	0	0	0	0	0	0	0	0	0	0	0	0.990407
ENSG00000162496	7.17186	4.11258	6.4828	6.81776	3.89996	6.99419	3.53771	5.89987	6.77914	5.78149	6.67839	5.96789	4.9031	5.93715	7.02773	6.15515	5.9832	5.07133	7.72986	5.64014	5.48864	5.79184	7.56168	5.67116	4.86396	6.07155	4.75581	7.37225	5.7901	6.99986	0.236243
ENSG00000221340	0.594681	0	0	1.25764	0	0.729366	0	0	0	0	0.0211862	0	0	0	0	0.00464832	0	0	1.0046	0	0	0	0.885986	0	0	0	0	1.08277	0	0.312146	0.872904
ENSG00000272482	3.15531	0	2.55032	1.6521	0	2.95022	0	0.499778	2.87767	1.50567	2.15281	1.64741	0.0956959	1.06844	0.391795	0.84975	1.16022	0	3.85764	1.25708	0	1.72835	2.91309	0.468544	0	0.85155	0	2.15147	1.75971	2.95112	0.672498
ENSG00000204518	0	0	0	0	0	0	0	0	0.0328049	0	0	0	0	0	0	0	0	0	0	0	0	0	0	0	0	0	0	0	0	1.25922	0.999102
ENSG00000226166	0	0	0	0	0	0	0	0	0	0	0	0	0	0	0	0	0	0	0	0	0	0	0	0	0	0	0	0	0	0	NA
ENSG00000188984	0	0	0	0	0	0	0	1.57133	0	0	0	0	0	0	0	0	0	0	0	0	0	0	0	0	0	0	0	0	0	0	1
ENSG00000238771	0	0	0	0	0	0	0	0	0	0	0	0	0	0	0	0	0	0	0	0	0	0	0	0	0	0	0	0	0	0	NA
ENSG00000157330	0	0	0	0	0	0	0	0	0	0	0	3.38011	0	0	0	0.312819	0	0	0	0	0	0	0	0	0	0	4.74843	0	0	0	0.973182
ENSG00000116726	0	0	0	0	0	0	0	0	0	0	0	0	0	0	0	0	0	0	0	0	0	0	0	0	0	0	0	0	0	0	NA
ENSG00000116721	0	0	0	0	0	0	0	0	0	0	0	0	0	0	0	0	0	0	0	0	0	0	0	0	0	0	0	0	0	0	NA
ENSG00000228338	0	0	0	0	0	0	0	0	0	0	0	0	0	0	0	0	0	0	0	0	0	0	0	0	0	0	3.73197	0	0	0	1
ENSG00000204513	0	0	0	0	0	0	0	0	0	0	0	0	0	0	0	0	0	0	0	0	0	0	0	0	0	0	0.203473	0	0	0	1
ENSG00000231103	0	0	0	0	0	0	0	0	0	0	0	0	0	0	0	0	0	0	0	0	0	0	0	0	0	0	0	0	0	0	NA
ENSG00000179172	0	0	0	0	0	0	0	0	0	0	0	0	0	0	0	0	0	0	0	0	0	0	0	0	0	0	0	0	0	0	NA
ENSG00000120952	0	0	0	0	0	0	0	0	0	0	0	0	0	0	0	0	0	0	0	0	0	0	0	0	0	0	0	0	0	0	NA
ENSG00000243073	0	0	0	0	0	0	0	0	0	0	0	0	0	0	0	0	0	0	0	0	0	0	0	0	0	0	0	0	0	0	NA
ENSG00000187545	0	0	0	0	0	0	0	0	0	0	0	0	0	0	0	0	0	0	0	0	0	0	0	0	0	0	0	0	0	0	NA
ENSG00000204510	0	0	0	0	0	0	0	0	0	0	0	0	0	0	0	0	0	0	0	0	0	0	0	0	0	0	0	0	0	0	NA
ENSG00000207434	0	0	0	0	0	0	0	0	0	0	0	0	0	0	0	0	0	0	0	0	0	0	0	0	0	0	0	0	0	0	NA
ENSG00000234064	0	0	0	0	0	0	0	0	0	0	0	0	0	0	0	0	0	0	0	0	0	0	0	0	0	0	0	0	0	0	NA
ENSG00000232423	0	0	0	0	0	0	0	0	0	0	0	0	0	0	0	0	0	0	0	0	0	0	0	0	0	0	0	0	0	0	NA
ENSG00000250894	0	0	0	0	0	0	0	0	0	0	0	0	0	0	0	0	0	0	0	0	0	0	0	0	0	0	0	0	0	0	NA
ENSG00000204508	0	0	0	0	0	0	0	0	0	0	0	0	0	0	0	0	0	0	0	0	0	0	0	0	0	0	0	0	0	0	NA
ENSG00000239810	0	0	0	0	0	0	0	0	0	0	0	0	0	0	0	0	0	0	0	0	0	0	0	0	0	0	0	0	0	0	NA
ENSG00000250113	0	0	0	0	0	0	0	0	0	0	0	0	0	0	0	0	0	0	0	0	0	0	0	0	0	0	0	0	0	0	NA
ENSG00000204505	0	0	0	0	0	0	0	0	0	0	0	0	0	0	0	0	0	0	0	0	0	0	0	0	0	0	0	0	0	0	NA
ENSG00000233336	0	0	0	0	0	0	0	0	0	0	0	0	0	0	0	0	0	0	0	0	0	0	0	0	0	0	0	0	0	0	NA
ENSG00000229978	0	0	0	0	0	0	0	0	0	0	0	0	0	0	0	0	0	0	0	0	0	0	0	0	0	0	0	0	0	0	NA
ENSG00000236179	0	0	0	0	0	0	0	0	0	0	0	0	0	0	0	0	0	0	0	0	0	0	0	0	0	0	0	0	0	0	NA
ENSG00000179412	0	0	0	0	0	0	0	0	0	0	0	0	0	0	0	0	0	0	0	0	0	0	0	0	0	0	0	0	0	0	NA
ENSG00000224199	0	0	0	0	0	0	0	0	0	0	0	0	0	0	0	0	0	0	0	0	0	0	0	0	0	0	0	0	0	0	NA
ENSG00000229571	0	0	0	0	0	0	0	0	0	0	0	0	0	0	0	0	0	0	0	0	0	0	0	0	0	0	0	0	0	0	NA
ENSG00000204503	0	0	0	0	0	0	0	0	0	0	0	0	0	0	0	0	0	0	0	0	0	0	0	0	0	0	0	0	0	0	NA
ENSG00000233394	0	0	0	0	0	0	0	0	0	0	0	0	0	0	0	0	0	0	0	0	0	0	0	0	0	0	0	0	0	0	NA
ENSG00000204502	0	0	0	0	0	0	0	0	0	0	0	0	0	0	0	0	0	0	0	0	0	0	0	0	0	0	0	0	0	0	NA
ENSG00000231219	0	0	0	0	0	0	0	0	0	0	0	0	0	0	0	0	0	0	0	0	0	0	0	0	0	0	0	0	0	0	NA
ENSG00000207511	0	0	0	0	0	0	0	0	0	0	0	0	0	0	0	0	0	0	0	0	0	0	0	0	0	0	0	0	0	0	NA
ENSG00000182330	0	0	0	0	0	0	0	0	0	0	0	0	0	0	0	0	0	0	0	0	0	0	0	0	0	0	0	0	0	0	NA
ENSG00000237700	0	0	0	0	0	0	0	0	0	0	0	0	0	0	0	0	0	0	0	0	0	0	0	0	0	0	0	0	0	0	NA
ENSG00000204501	0	0	0	0	0	0	0	0	0	0	0	0	0	0	0	0	0	0	0	0	0	0	0	0	0	0	0	0	0	0	NA
ENSG00000228229	0	0	0	0	0	0	0	0	0	0	0	0	0	0	0	0	0	0	0	0	0	0	0	0	0	0	0	0	0	0	NA
ENSG00000204495	0	0	0	0	0	0	0	0	0	0	0	0	0	0	0	0	0	0	0	0	0	0	0	0	0	0	0	0	0	0	NA
ENSG00000204491	0	0	0	0	0	0	0	0	0	0	0	0	0	0	0	0	0	0	0	0	0	0	0	0	0	0	0	0	0	0	NA
ENSG00000204488	0	0	0	0	0	0	0	0	0	0	0	0	0	0	0	0	0	0	0	0	0	0	0	0	0	0	0	0	0	0	NA
ENSG00000204486	0	0	0	0	0	0	0	0	0	0	0	0	0	0	0	0	0	0	0	0	0	0	0	0	0	0	0	0	0	0	NA
ENSG00000204485	0	0	0	0	0	0	0	0	0	0	0	0	0	0	0	0	0	0	0	0	0	0	0	0	0	0	0	0	0	0	NA
ENSG00000224581	0	0	0	0	0	0	0	0	0	0	0	0	0	0	0	0	0	0	0	0	0	0	0	0	0	0	0	0	0	0	NA
ENSG00000157358	0	0	0	0	0	0	0	0	0	0	0	0	0	0	0	0	0	0	0	0	0	0	0	0	0	0	0	0	0	0	NA
ENSG00000204481	0	0	0	0	0	0	0	0	0	0	0	0	0	0	0	0	0	0	0	0	0	0	0	0	0	0	0	0	0	0	NA
ENSG00000204480	0	0	0	0	0	0	0	0	0	0	0	0	0	0	0	0	0	0	0	0	0	0	0	0	0	0	0	0	0	0	NA
ENSG00000204479	0	0	0	0	0	0	0	0	0	0	0	0	0	0	0	0	0	0	0	0	0	0	0	0	0	0	0	0	0	0	NA
ENSG00000204478	0	0	0	0	0	0	0	0	0	0	0	0	0	0	0	0	0	0	0	0	0	0	0	0	0	0	0	0	0	0	NA
ENSG00000162494	0	4.62856	0	0	1.04279	0	0	0.296491	0	0	0	0	0.144751	0	0	0	0.166945	4.99243	1.23426	0	0	0	0	0	0	0	0.144887	0	0	0.522555	0.943492
ENSG00000259961	0	0	0	0	0	0	0	0	0	0	0	0	0	0	0	0	0	0	0	0	0	0	0	0	0	0	0	0	0	0	NA
ENSG00000215909	0	0	0	0	0	0	0	0	0	0	0	0	0	0	0	0	0	0	0	0	0	0	0	0	0	0	0	0	0	0	NA
ENSG00000162493	5.30645	1.62259	3.37001	5.46214	2.94488	4.83646	0	4.25818	5.86951	4.18055	4.17862	5.65934	2.9614	1.46447	0	5.33666	3.54213	3.92821	5.07166	5.43203	1.42426	2.56718	4.46144	3.95958	0	4.61371	2.46472	3.26733	5.05252	5.19152	0.397482
ENSG00000222952	0	0	0	0	0	0	0	0	0	0	0	0	0	0	0	0	0	0	0	0	0	0	0	0	0	0	0	0	0	0	NA
ENSG00000266358	0	0	0	0	0	0	0	0	0	0	0	0	0	0	0	0	0	0	0	0	0	0	0	0	0	0	0	0	0	0	NA
ENSG00000237445	0	0	0	0	0	0	0	0	0	0	0	0	0	0	0	0	0	0	0	0	0	0	0	0	0	0	0	0	0	0	NA
ENSG00000253085	0	0	0	0	0	0	0	0	0	0	0	0	0	0	0	0	0	0	0	0	0	0	0	0	0	0	0	0	0	0	NA
ENSG00000116731	4.09786	3.40828	4.37006	4.85576	4.06367	4.26946	3.9128	4.38019	4.75012	4.18175	4.26497	4.43677	2.81707	3.04141	1.92997	4.26284	4.13682	3.77081	4.67149	5.18754	2.37403	3.88761	4.48705	4.2305	4.11452	3.61217	4.14797	4.72417	4.86113	4.67266	0.224043
ENSG00000252151	0	0	0	0	0	0	0	0	0	0	0	0	0	0	0	0	0	0	0	0	0	0	0	0	0	0	0	0	0	0	NA
ENSG00000231606	0	0	0	0	0	0	0	0	0	0	0	0	0	0	0	0	0	0	0	0	0	0	0	0	0	0	0	0	0	0	NA
ENSG00000234593	0	0	0	0	0	0	0	0	0	0	0	0	0	0	0	0	0	0	0	0	0	0	0	0	0	0	0.378335	0	0	0	1
ENSG00000189337	3.32766	3.54311	2.91476	2.87587	4.76254	3.54257	0.98607	4.00651	4.07492	2.20452	3.75836	3.62629	1.04677	3.64674	0.988689	4.04694	3.30786	0	3.88083	4.23587	1.86267	2.39012	2.97811	1.80196	6.21306	1.98906	2.49854	3.59217	2.39252	4.49017	0.529511
ENSG00000235829	0	0	0	0	0	0	0	0	0	0	0	0	0	0	0	0	0	0	0	0	0	0	0	0	0	0	0	0	0	0	NA
ENSG00000175147	0	0.706173	0	2.87066	1.71476	0	0	0	1.30562	0.495312	0.269174	1.39402	0	1.17331	0	0	0.820991	0	0	2.38778	2.78887	0.253696	1.20095	0.477787	0	1.86646	0	0	0	1.81305	0.775758
ENSG00000171729	2.80722	4.73268	4.12035	5.37419	3.21881	3.3302	1.64071	3.10849	4.57107	4.79581	4.14169	4.47007	1.75676	5.13494	1.44054	4.68633	3.98424	0.222002	3.81181	5.36448	4.81052	3.66966	4.83627	4.42613	3.53547	5.16746	2.5314	3.27681	3.6168	4.92208	0.306193
ENSG00000204464	0	0	0	0	0	0	0	0	0	0	0	0	0	0	0	0	0	0	0	0	0	0	0	0	0	0	0.322815	0	0	0	1
ENSG00000215720	0	0	0	0	0	0	0	0	0	0	0	0	0	0	0	0	0	0	0	0	0	0	0	0	0	0	0	0	0	0	NA
ENSG00000142621	0	0	0	0	0	0	0	0	0.513764	0	0	3.47562	0	0	0	1.58502	0	0	0	0	0	0	0	0	0	0	4.56438	0.0730267	0	0	0.957335
ENSG00000233485	0	1.02078	0	0	0	0	0	0	0	0	0	0	0	0	0	0	0	0	0	0	0	0	1.29566	0	0	0	1.05615	0.93185	0	0	0.919924
ENSG00000236045	0	0	0	0	0	0	0	0	0	0	0	0	0	0	0	0	0	0	0	0	0	0	0	0	0	0	0	0	0	0	NA
ENSG00000228140	0	0	0	0	0	0	0	0	0	0	0	0.957941	0	0	0	0	0	0	0	0	0	0	0	0	0	0	3.66824	0	0	0	0.990995
ENSG00000142634	5.95873	6.5351	5.50022	6.75862	5.88346	5.6635	8.71396	5.89317	6.1877	6.61865	6.09098	6.16858	3.965	4.78576	4.56658	6.94429	5.47167	2.38522	5.42466	5.78322	5.7389	5.82957	6.47207	7.13433	8.02485	6.68506	7.79449	6.58447	6.20839	6.32885	0.313879
ENSG00000162438	1.42804	0	0.739049	0	0	0.0815436	0	0	0.321414	0	0	0	0	0	0	0	0	0	2.2693	0.24379	11.8695	0	0.37498	0	0.325059	0	0	0	0	0	0.983199
ENSG00000142615	2.43303	1.76683	2.12373	0.434668	0	0.989134	0	0.377727	1.33364	0.558395	0.611483	0.433295	0	0.226761	0.567012	0.0710696	0	0	3.52039	1.27779	12.5631	0.253345	1.30023	0.459361	0.78689	0.922977	1.17229	0.197874	0.549635	0.361832	0.937613
ENSG00000215704	0.417554	1.81684	0	0	0	0	0	0	0	0	0	0	0	0	0	0	0	0	1.34561	0.402648	10.4309	0	0	0	0	0	0.563422	0	0	0	0.984971
ENSG00000132906	2.94648	4.36153	3.49915	3.61964	3.02899	3.07423	2.58538	2.17545	4.15757	3.13032	3.2181	4.6833	2.34189	3.45999	2.24813	3.4077	2.65205	2.16264	4.04069	5.9554	3.60347	4.87116	4.12148	3.13629	3.18822	2.9586	4.77852	4.76528	4.60195	3.72332	0.417848
ENSG00000116138	2.51884	2.57015	2.28582	3.05736	2.37089	2.72143	1.67426	2.81012	2.94249	2.62984	2.54817	3.08029	1.53424	2.93706	2.48095	2.72399	2.83447	2.54054	2.96657	3.31928	1.85447	3.00511	3.00891	2.81503	2.93011	2.2598	3.18387	3.39007	3.27182	2.88914	0.208997
ENSG00000251866	0	0	0	0	0	0	0	0	0	0	0	0	0	0	0	0	0	0	0	0	0	0	0	0	0	0	0	0	0	0	NA
ENSG00000272510	0	0	0	0	0	0	0	0	0	0	0	0	0	2.02463	2.36976	0	0	0.126276	0	0	0	0	0	0.842311	0	0	0	0.00786418	0	0	0.956331
ENSG00000116771	0	0.854977	0	0	0	0	1.35499	0	0	2.16087	0	0	0	6.09454	5.09997	0	1.00974	3.27962	0	0	0	0	0	3.52635	1.42212	0	1.0543	0	0	0	0.888182
ENSG00000237301	0	0	0	0	0	0	0	0	0	0	0	0.203613	0	0	0	0	0	0	0	0	0	0	0	0	0	0	0.61123	0	0	0	0.988513
ENSG00000235084	0.486098	1.46807	0.741469	0.456758	0.369157	0.625806	0.295182	0.384679	0.498539	0.339329	0.219231	1.09427	0	0.579532	0	0.631871	0.557695	0.587964	1.10403	0.807921	0	1.35559	0.817549	0.32124	0.691306	0.273139	3.72923	1.45529	0.678111	0.321206	0.841318
ENSG00000252417	0	0	0	0	0	0	0	0	0	0	0	0	0	0	0	0	0	0	0	0	0	0	0	0	0	0	0	0	0	0	NA
ENSG00000236500	0	0	0	0	0	0	0	0	0	0	0	0	0	0	0	0	0	0	0	0	0	0	0	0	0	0	0	0	0	0	NA
ENSG00000197312	4.26215	3.2498	3.41659	4.47544	2.54603	4.28524	2.72428	4.271	4.19649	3.36213	4.02537	3.93923	2.39511	2.89394	3.7933	4.21141	4.23786	4.67989	4.20901	3.78449	2.56072	3.1224	4.26341	3.62543	3.72945	3.04515	3.01891	3.67446	4.56654	4.4808	0.216264
ENSG00000271742	0	0	0	0	0	0	0	0	0	0	0	0	0	0	0	0	0	0	0	0	0	0	0	0	0	0	1.23515	0	0	0	1
ENSG00000116786	6.28618	5.84903	6.44728	6.08839	6.6941	6.12081	5.63827	6.43443	6.39738	5.80555	6.01142	6.11124	5.57569	5.26078	4.15182	6.79978	5.65803	6.89864	6.65815	6.36716	4.53653	5.87768	6.099	5.68846	6.51209	5.4645	6.57443	6.20081	6.46357	6.30061	0.129897
ENSG00000237938	0.50405	0.735772	0.544377	0.579768	0	0.465676	0	0.658046	0.699269	0.171695	0.426919	0.709417	0	0	0	1.36588	0.689601	0	0.932062	1.33563	0	0.510846	0.810693	0.651309	1.16382	0.223731	0.238985	1.27987	1.10123	0.99765	0.610446
ENSG00000162461	2.08539	2.64493	3.02372	2.0218	2.99389	1.89106	0	1.28987	2.68261	2.81483	1.57377	2.74573	2.5984	2.57735	1.96478	2.41968	1.9089	4.77054	2.90909	3.30596	1.75713	2.96892	2.38559	4.08357	2.7976	1.60786	2.68313	3.09063	3.16973	2.41693	0.491037
ENSG00000162460	0	0	0	0	0	0	0	0	0	2.43956	0	0	0	3.43197	5.13323	0	0	0	0	0	0	0	0	4.43297	0	0	0	0	0	0	0.930779
ENSG00000224459	0	0	4.05614	0	0	0	0	0	0	0	0	0	0	0	0	0	0	0	0	0	0	0	0	0	0	0	0	0	0	0	1
ENSG00000162458	5.22033	4.22193	8.64633	6.01145	0.522535	5.16369	0	4.42496	5.84677	5.79709	5.12707	6.11449	4.70424	4.86501	2.06744	5.76568	5.05949	1.56642	4.92898	5.83748	3.86358	3.94001	6.14691	5.78717	5.18621	4.98284	4.53945	4.78627	6.60752	5.34878	0.463859
ENSG00000224321	0.65329	0	0	0	0	0.487367	0	0	0	0.608612	0	0	0	0	0.782775	0	0	0	0	0	0	0	0	1.70946	0	0	0	0	0	0	0.948924
ENSG00000233954	4.23695	3.56502	4.23424	4.259	4.57583	4.16905	4.48631	4.58636	4.41087	4.50218	4.38891	3.86479	5.42138	4.24627	2.99114	4.04317	4.24746	4.78917	3.82667	4.6289	2.77749	4.16452	4.03111	4.25349	4.00297	4.04408	3.50835	4.03982	4.20883	4.48236	0.239503
ENSG00000178715	0.752425	0	0.869335	0.209221	0	0.854371	0.497374	1.07253	0.513794	0.561115	0.464538	0.588887	0	0	0	0.85644	0.164676	0.434611	1.1999	1.86597	0	0	0.520904	0.414005	0.608542	0.199896	0	0.847363	1.24037	0.828968	0.74684
ENSG00000179743	2.02116	2.03229	2.82871	2.86863	2.61481	2.43056	1.75083	2.13208	3.01745	2.55185	2.54572	2.98916	1.52313	2.15213	1.09774	2.53533	2.21095	2.81378	3.27577	3.23269	1.20665	3.66738	2.88384	2.48906	3.08698	2.0914	3.9147	2.93896	3.52671	2.75286	0.354611
ENSG00000065526	4.78647	3.77944	5.53437	4.9789	4.1635	4.88178	3.98543	4.82607	5.03878	4.3904	4.62908	5.23217	3.16906	3.77019	3.1538	5.07925	4.46183	4.16802	5.39946	5.53766	3.40931	4.53254	4.63697	4.58779	4.58361	4.0749	4.53781	5.28866	5.34274	4.90188	0.18225
ENSG00000238818	0	0	0	0	0	0	0	0	0	0	0	0	0	0	0	0	0	0	0	0	0	0	0	0	0	0	0	0	0	0	NA
ENSG00000270620	0	0	0	0	0	0	0	0	0	0	0	0	0	0	0	0	0	0	0	0	0	0	0	0	0	0	0	0	0	0	NA
ENSG00000116809	4.41831	4.23095	4.65226	4.4716	3.98005	4.54266	4.29381	4.34409	4.85717	4.38637	4.43113	4.58848	3.27161	3.95959	3.05912	5.04822	4.23972	3.76876	4.83092	4.95119	3.33425	4.57754	4.98717	4.53846	5.20343	4.14041	5.38401	5.16819	5.12955	4.77827	0.179029
ENSG00000234607	0	0	0	0	0	0	0	0	0	0	0	0	0	0	0	0	0	0	0	0	0	0	0	0	0	0	0	0	0	0	NA
ENSG00000231353	0	0	0	0	0	0	0	0	0	0	0	0	0	0	0	0	0	0	0	0	0	0	0	0	0	0	0	0	0	0	NA
ENSG00000224966	0	0	0	0	0	0	0	0	0	0	0	0	0	0	0	0	0	0	0	0	0	0	0	0	0	0	0	0	0	0	NA
ENSG00000183888	0	0	0	0	1.32308	1.88987	0	0	0	0	0	0	0	0	0	0	0.780016	0	0	0	0	0	0	0	0	0	0	0	0	0	0.961627
ENSG00000173641	7.53801	6.89664	9.19846	6.85563	2.24703	6.95228	1.21346	4.0912	6.21102	6.80236	7.3404	6.61018	10.4412	4.06492	0.696092	4.88202	5.25551	9.98806	4.937	5.31627	1.66474	3.31767	6.04268	5.28725	2.48178	6.29084	5.26871	5.05535	7.62709	5.4315	0.486237
ENSG00000186510	0	2.18565	0.118454	0	1.27758	0.820305	0	0.044251	0	0	0	0.275858	0	6.48542	0	0	1.64003	0	0	1.15603	1.32149	5.07568	0.823733	0	0	2.14349	3.41263	5.69202	1.46372	0	0.854044
ENSG00000232456	0	0.649693	0	0	3.49082	0	0	0	0	0	0	0	0	2.13585	0	0	0	0	0	0	0	1.49199	0	0	0	0	0	0	0	0	0.957746
ENSG00000184908	0	0.985	0	0	1.27273	0	0	0	0	0	0	0	0.85524	7.32968	0	0	3.88081	0	0.613381	1.01445	0	1.80915	0.00151385	0	0	0	2.27675	4.77213	0.613702	0	0.914872
ENSG00000185519	0	2.83797	0	0	4.82373	0	0	1.31002	0.648047	0	0	0.0391384	1.79875	3.20613	0	0	0.386887	0	0	0	1.05288	3.76294	0	0.142438	0	0.0392072	0.581122	1.15427	0.199013	0.542396	0.873462
ENSG00000142627	5.02518	3.68879	4.06791	5.27234	1.45684	4.886	0	5.63014	5.96555	3.96547	6.58844	5.00931	3.51548	4.38258	3.90772	5.32	5.72638	1.95898	5.37167	3.65688	3.18775	3.9684	4.52229	4.49441	3.87669	4.34763	2.31365	5.20144	5.09383	6.81382	0.380561
ENSG00000227959	0	0	0	1.09653	0	0.0946713	0	0.48711	1.42274	0	1.15435	0.137279	0	0.0930213	0	0.223061	1.67079	0	0	0	0	0	0.201065	1.15541	0	0.204802	0	0.603334	0.909973	2.10399	0.845054
ENSG00000224621	0	0	0	0.552583	0	0	0	0	0.171405	0	0.642367	0	0	0	0	0	1.29403	0	0	0	0	0	0	1.17645	0	0.160452	0	0.100739	0	1.1066	0.895792
ENSG00000142632	2.78264	4.36449	2.92804	4.14207	0.136247	3.63648	1.33716	5.07557	4.46443	2.32254	3.8773	4.11353	1.19313	2.38746	0.691376	3.13187	4.46664	0	3.3442	4.19716	2.79908	2.06431	4.1652	2.79343	3.17604	3.35342	2.37931	4.97992	4.02889	4.66702	0.40266
ENSG00000237276	0	1.5427	0	0	0	0	0	1.47418	0.818687	0	1.62414	0.777367	0	0.31249	0	0.092602	2.35121	0	0.453654	0.129889	0.401707	0	0	0	0	0.448865	0.516063	2.20675	0.0651997	1.51049	0.818512
ENSG00000204377	0	1.99251	0.899234	1.51211	2.23006	0.221073	0	1.37	0.727774	1.19088	1.50365	1.94418	0.0957134	0.866932	0.108889	0.681465	1.05881	0	1.36001	2.02625	0.103639	2.60744	1.3218	0.713901	1.02923	0.945482	2.37843	2.31114	1.90002	0.500491	0.590116
ENSG00000132881	1.42478	3.00144	2.4914	3.07934	2.55505	1.81199	1.03173	2.62176	2.56889	2.15087	2.57534	3.36295	1.27719	2.20001	1.14248	2.14576	2.33761	0.467121	2.87153	3.42884	1.44142	3.37918	2.41885	1.73194	2.07972	2.17361	3.51601	3.48542	3.16518	2.0659	0.347936
ENSG00000233929	1.47774	0	1.80838	0	0.314467	1.36009	0.958114	1.87847	0.548419	0.0536688	0.65685	1.36424	0	0.237599	1.607	1.43058	0.587447	2.40491	1.29509	0.298608	0.563863	0.358167	0.786075	0	0	0.575598	1.33525	1.83666	0.0645386	1.14909	0.676724
ENSG00000037637	3.39678	2.94351	4.55725	3.91649	2.96737	3.41923	2.92952	4.12241	3.9757	3.16257	3.55184	3.97911	2.43424	2.52483	1.88245	3.49655	3.15935	3.12024	4.06194	3.99208	1.99908	3.58807	3.85823	3.03454	3.33918	2.92684	3.51911	3.81235	4.37866	3.85873	0.263387
ENSG00000055070	5.72569	5.6535	6.4568	6.01673	4.30789	5.69135	5.70344	6.02272	6.09132	5.77378	6.00234	6.12063	4.78427	5.24012	4.47772	5.92936	5.2277	5.46328	5.92198	6.27005	3.95932	5.1864	5.85523	5.65601	5.88631	5.4226	5.0086	5.97201	6.40945	5.69224	0.137653
ENSG00000226457	0	0	0	0	0	0	0	0	0	0	0	0	0	0	0	0	0	0	0	0	0	0	0	0	0	0	0	0	0	0	NA
ENSG00000187144	0	0	0	0	0	0	0	0	0	0	0	0	0	0	0	0	0	0	0	0	0	0	0	0	0	0	3.55461	0	0	0	1
ENSG00000157191	5.80817	5.45	5.56373	5.39976	4.32119	5.72809	5.89125	6.05182	5.7943	4.96702	5.26082	5.52602	3.6001	5.07428	4.14173	6.3123	5.20006	2.51526	5.88701	6.04326	3.77066	5.07387	5.40739	5.46264	6.81608	4.82347	6.09014	5.63205	5.61731	5.71222	0.230391
ENSG00000226029	1.0054	0.809909	1.94542	1.49253	2.54677	1.35342	0	0.965394	2.27915	1.43077	1.30744	2.12584	0	0.674615	0	1.66605	1.02865	0	2.92284	3.0021	0.0018464	1.96001	2.00206	1.16259	1.81662	0.889009	1.51706	2.19373	2.59362	2.08229	0.543159
ENSG00000080947	1.89313	2.12853	2.84019	2.89652	3.40488	2.18937	0.224005	1.6168	3.36204	2.50723	2.24247	3.47954	0.646227	1.79085	0	2.33588	1.93517	0	3.56722	4.10934	1.00483	3.88528	3.20126	2.14809	2.77153	1.84017	2.50973	3.43838	3.82264	3.10331	0.439584
ENSG00000206652	0	0	0	0	0	0	0	0	0	0	0	0	0	0	0	0	0	0	0	0	0	0	0	0	0	0	0	0	0	0	NA
ENSG00000261135	0	0	0	0	0.0693024	0	0	0	0	0	0	0	0	0	0	0	0	0	0.156963	0	0.0523873	0.576053	0	0	0	0	2.11642	0.0419509	0	0	0.985391
ENSG00000224174	0	0	0	0	0	0	0	0	0	0	0	0	0	0	0	0	0	0	0	0	0	0	0	0	0	0	0.440999	0	0	0	1
ENSG00000233421	0	0	0	0	0	0	0	0	0	0	0	0	0	0	0	0	0	0	0	0	0	0	0	0	0	0	4.14778	0	0	0	1
ENSG00000268674	0	0	0	0	0	0	0	0	0	0	0	0	0	0	0	0	0	0	0	0	0	0	0	0	0	0	0	0	0	0	NA
ENSG00000225710	0	0	0	0	0	0	0	0	0	0	0	0	0	0	0	0	0	0	0	0	0	0	0	0	0	0	0	0	0	0	NA
ENSG00000266584	0	0	0	0	0	0	0	0	0	0	0	0	0	0	0	0	0	0	0	0	0	0	0	0	0	0	0	0	0	0	NA
ENSG00000219481	3.22947	4.98062	3.71224	4.14286	3.65956	3.44629	0.279615	3.0888	4.40551	3.86209	3.12413	3.98287	1.596	2.82647	2.22616	3.10239	3.15651	1.42792	3.69	4.64513	1.79239	3.54781	3.77692	3.86413	3.26042	2.9646	4.96311	3.50348	4.34893	3.95057	0.338288
ENSG00000271732	0	0.349769	0	0	0	0	0	0	0	0	0	0	0	0	0	0	0	0	0	0	0	0	0	0	0	0	1.45157	0	0	0	0.991691
ENSG00000215908	4.77217	4.64696	4.84603	4.93224	5.5487	5.06218	3.9324	4.86203	5.54608	5.15012	4.73215	5.70779	3.39043	4.82138	5.9518	5.07428	4.7688	3.76432	5.57782	5.77301	3.82692	5.0812	5.51709	5.483	6.01341	4.59563	5.52012	5.51905	5.78244	5.3341	0.165541
ENSG00000186301	1.78901	3.90788	1.31142	2.56283	1.55155	3.09852	0.236343	3.50453	2.23981	3.98507	2.33055	2.56033	0.258356	4.68623	8.12062	2.942	3.41671	0	2.18369	2.26213	4.18761	3.26515	3.46047	3.60744	3.64285	3.36226	5.78967	4.69435	1.89133	3.05968	0.652703
ENSG00000207513	0	0	0	0	0	0	0	0	0	0	0	0	0	0	0	0	0	0	0	0	0	0	0	0	0	0	0	0	0	0	NA
ENSG00000237847	0	0	0	0	0	0	0	0	0	0	0	0	0	0	0	0	0	0	0	0	0	0	0	0	0	0	0	0	0	0	NA
ENSG00000264742	0	0	0	0	0	0	0	0	0	0	0	0	0	0	0	0	0	0	0	0	0	0	0	0	0	0	0	0	0	0	NA
ENSG00000236698	0	0	0	0	0	0	0	0.175477	0	0	0	0.418784	0	0.154736	0.393159	0	0	0	0	0.20917	0	0	0	0	0	0	1.19359	0	0.0853916	0	0.958493
ENSG00000268869	0	0	0	0	0	0	0	0	0	0	0	1.85244	0	1.61305	0.208156	0	0	0	0	0	0	0.257382	0	0	0	0	2.77844	0	0	0	0.951213
ENSG00000268991	0	0	0	0	0	0	0	0	0	0	0	0	0	0	0	0	0	0	0	0	0	0	0	0	0	0	0	0	0	0	NA
ENSG00000058453	3.88963	3.48483	4.00876	4.34502	4.20578	4.0972	2.02981	4.23768	4.93344	3.92407	4.00496	5.90273	2.28956	3.3424	1.50457	4.23665	3.67575	2.1156	4.73737	4.9175	3.11261	4.45562	4.45648	3.8465	4.33758	3.69965	3.79298	4.28472	5.09899	4.65	0.347375
ENSG00000207389	0	0	0	0	0	0	0	0	0	0	0	0	0	0	0	0	0	0	0	0	0	0	0	0	0	0	0	0	0	0	NA
ENSG00000227684	0	0	0	0	0	0	0	0	0	0	0	0	0	0	0	0	0	0	0	0	0	0	0	0	0	0	0	0	0	0	NA
ENSG00000186715	0.167465	1.91291	0	1.23644	0.104381	1.5983	0	1.59836	0.711102	4.33556	0.86421	0.942158	0	5.72201	5.9562	2.61457	1.77536	0	0.54258	1.01269	4.54069	1.94471	2.27617	3.64463	1.83539	3.68064	3.81646	2.94519	0.740283	1.27979	0.699866
ENSG00000223643	0	0	0	0	0	0	0	0	0	0	0	0	0	0	0	0	0	0	0	0	0	0	0	0	0	0	0	0	0	0	NA
ENSG00000230239	0	0	0	0	0	0	0	0	0	0	0	0	0	0	0	0	0	0	0	0	0	0	0	0	0	0	0	0	0	0	NA
ENSG00000263811	0	0	0	0	0	0	0	0	0	0	0	0	0	0	0	0	0	0	0	0	0	0	0	0	0	0	0	0	0	0	NA
ENSG00000228549	0	0.786158	0	0	0.184603	0	0	0	0	0.764424	0	0.669195	0	0	0	0	0	0	0	0.0805807	0.577488	0	0	0	0	1.02427	4.3907	0	0.0528138	0	0.96749
ENSG00000238142	3.3016	3.32981	3.03044	3.78309	2.43728	3.25359	1.50493	2.72721	3.48132	3.56576	2.91213	3.87228	1.85859	3.07192	2.86598	3.4946	2.95553	1.82456	3.50598	2.90654	2.86698	2.67962	2.96455	3.25002	3.84398	3.11438	2.85743	3.56421	3.75798	3.26878	0.216546
ENSG00000235241	1.7125	2.30409	1.71473	2.35111	1.58259	1.72924	0	1.33712	2.05023	2.27033	1.80412	2.45947	0.687277	1.65324	1.03499	2.00872	1.39105	0.766682	2.19165	1.98885	1.20069	1.71549	1.75717	2.01536	2.7266	1.77417	1.87487	2.30934	2.7349	1.88204	0.365875
ENSG00000207005	0	0	0	0	0	0	0	0	0	0	0	0	0	0	0	0	0	0	0	0	0	0	0	0	0	0	0	0	0	0	NA
ENSG00000272426	0	0	0	0	0	0	0	0	0	0	0	0	0	0	0	0	0	0	0	0.488825	0	0.0372758	0	0	0	0	1.23442	0	0	0	0.985304
ENSG00000117122	4.19621	0.694933	4.83695	3.03703	0	3.81385	0	4.54987	5.75835	2.94195	2.57588	4.05955	1.48456	1.8162	0	3.79377	3.16897	0	3.68151	4.80967	2.26987	3.29212	3.73289	2.71163	0.624126	2.01947	3.68137	2.89449	5.36747	4.76058	0.516056
ENSG00000226526	0	0	0	0	0	0	0	0	0.0908288	0	0	0	0	0	0	0	0	0	0	0	0	0	0	0	0	0	0	0	0	0	1
ENSG00000159363	4.57043	4.71252	4.27346	4.55782	6.27901	4.6606	4.01891	4.73529	4.46372	4.35798	4.54711	4.50906	2.84841	4.34397	2.37299	5.18312	5.19418	3.56479	5.26302	4.2594	5.11075	6.77819	4.86208	4.67304	5.65011	4.54208	4.55489	5.20791	4.74923	4.56205	0.32528
ENSG00000117118	5.73105	5.99988	5.95874	5.84993	5.27227	5.73623	5.60763	5.63817	5.67227	5.94722	5.74765	5.74892	6.40992	6.1115	6.31639	5.72719	5.5022	6.77693	5.88451	5.28249	4.66779	5.27638	5.16634	5.96581	5.65006	5.77731	5.81539	5.56976	5.66877	5.5489	0.159163
ENSG00000117115	0.912558	0	0.743872	0.482398	5.74322	3.93946	6.59049	3.11599	1.51536	4.95214	0.436143	2.03919	0	2.36223	0	3.28644	4.74761	7.55761	3.84088	0	0	2.76723	1.65016	3.55744	4.52938	0.847023	0.765832	0.420553	0.35642	1.11878	0.722952
ENSG00000252180	0	0	0	0	0	0	0	0	0	0	0	0	0	0	0	0	0	0	0	0	0	0	0	0	0	0	0	0	0	0	NA
ENSG00000204362	0	0	0	0	0	0	0	0	0	0	0	0	0	0	0	0	0	0	0	0	0	0	0	0	0	0	0	0	0	0	NA
ENSG00000142623	0	0	0	0	0	0	0	2.91477	3.17424	0	6.54638	0	0	0	0.228559	0	4.64053	0	0	0	0	0	0.511089	0	0	0	0	0	0	5.7114	0.909502
ENSG00000142619	0	0	0	6.67219	0	0	0	1.70019	0	0	3.49631	0	0	0	0	0	0.721849	0	0	0	0	0	2.71598	0	0	0	0	0	0	2.62203	0.941826
ENSG00000266634	0	0	0	0.49099	0	0	0	0	0	0	0	0	0	0	0	0	0	0	0	0	0	0	0	0	0	0	0	0	0	0	1
ENSG00000159339	0.555801	0	0	0	0	0	7.39999	0	0	0	0	1.32665	0	0	0.146445	3.85351	0	0	0	0	0	0	0	0	5.6106	0	0	0	0	0	0.946444
ENSG00000269468	0	0	0	0	0	0	0	0	0	0	0	0	0	0	0	0	0	0	0	0	0	0	0	0	0	0	0	0	0	0	NA
ENSG00000256049	0	0	0	0	0	0	0	0	0	0	0	0	0	0	0	0	0	0	0	1.05527	0	0	0	0	0	0	0	0	0	0	1
ENSG00000179051	4.97105	4.61294	4.4219	5.38725	4.25419	5.43271	5.44205	6.31787	5.67101	5.00664	5.5904	5.22414	3.18031	4.42032	3.49898	5.63621	5.84232	2.79822	5.22322	5.54047	3.93838	4.43271	5.42403	5.47752	6.12729	4.62218	5.57841	5.41225	5.36121	5.85744	0.211947
ENSG00000239020	0	0	0	0	0	0	0	0	0	0	0	0	0	0	0	0	0	0	0	0	0	0	0	0	0	0	0	0	0	0	NA
ENSG00000074964	4.55354	3.46916	6.65141	5.37769	4.97078	4.54695	1.04199	5.19662	5.32743	4.87784	5.18023	4.56359	3.97002	5.07322	5.71856	4.38381	4.98254	4.68679	4.69725	4.00478	4.67426	3.68991	4.95257	4.705	3.85628	4.4298	2.97686	4.99312	4.75194	5.13131	0.32198
ENSG00000236648	0	0	0	0	0	0	0	0	0	0	0	0	0	0	0	0	0	0	0	0	0	0	0	0	0	0	1.09409	0	0	0	1
ENSG00000117148	0	0	0	0	0	0	0	0	0	0	0	0	0	0	0	0	0	0	0	0	0	0	0	0	0	0	4.07141	0	0	0	1
ENSG00000261781	0	0	0	0	0	0	0	0	0	0	0	0	0	0	0	0	0	0	0	0	0	0	0	0	0	0	0	0	0	0	NA
ENSG00000117154	1.78627	2.24354	2.67329	2.69387	5.81134	2.72642	0	0.0608704	1.97516	0.52512	0.0379228	1.46694	0	0.837968	0	1.70183	0.971631	0	3.26823	0.476821	0	1.66883	2.99798	0	4.59011	0	1.5595	0.487597	1.15899	1.38828	0.77869
ENSG00000230035	0	0	0	0	0	0	0	0	0	0	0	0	0	0	0	0	0	0	0	0	0	0	0	0	0	0	2.41089	0	0	0	1
ENSG00000225387	0	0	0	0	0	0	0	0	0	0	0	0	0	0	0	0	0	0	0	0	0	0.265235	0	0	0	0	0	0	0	0	1
ENSG00000179023	0	0	0	2.87029	0	2.58484	0	0	0	0	0	0	0	3.70586	1.82668	0.252	1.48745	0	0	0	0.992567	0	0	0	0	1.95577	0	1.46255	0	0	0.875015
ENSG00000235282	0	0	0	0	0	0	0	0	0	0	0	0	0	0	0	0	0	0	0	0	0	0	0	0	0	0	0	0	0	0	NA
ENSG00000225478	0	0	0	0	0	0	0	0	0	0	0	0	0	0	0	0	0	0	0	0	0	0	0	0	0	0	0	0	0	0	NA
ENSG00000009709	0	0	0	0	0	0	0	0	0	0	0	0	0	0	0	0	0	0.851522	0	0	0	0	0	0	0	0	0	0	0	0	1
ENSG00000179002	0	0	0	0	0	0	0	0	0	0	0	0	0	0	0	0	0	0	0	0	0	0	0	0	0	0	0	0	0	0	NA
ENSG00000159423	5.4036	4.48014	4.54844	5.81669	5.46953	5.15072	2.54362	4.31248	4.55412	3.3415	5.04721	4.33919	4.09308	7.37608	8.14954	3.69996	3.92616	5.46641	4.67882	3.96841	1.68077	4.16904	5.52498	2.92615	3.78392	3.97594	2.91542	3.96517	4.35127	4.89995	0.465132
ENSG00000265606	0	0	0	0	0	0	0	0	0	0	0	0	0	0	0	0	0	0	0	0	0	0	0	0	0	0	0	0	0	0	NA
ENSG00000221662	0	0	0	0	0	0	0	0	0	0	0	0	0	0	0	0	0	0	0	0	0	0	0	0	0	0	0	0	0	0	NA
ENSG00000169991	2.81327	3.44228	4.24558	4.08297	3.97462	4.70759	2.56404	7.67242	4.46081	3.68422	4.90104	3.55448	1.55128	3.14929	2.22898	3.86705	4.62618	2.62327	2.64234	2.52532	3.8369	3.77438	4.2117	2.75848	3.36623	2.73139	1.72336	3.23308	4.13679	5.18044	0.547877
ENSG00000272084	0.00685198	0	0.854472	1.18271	0.14989	0.249266	0	1.098	1.00654	0.402066	0.602491	0.416948	0	0.412087	0	0.868713	0	0	0.811414	1.21598	0	2.11347	1.58967	0.0595059	0.792038	0.0497154	1.42095	0.707981	1.20506	1.0628	0.736255
ENSG00000127481	4.80415	4.63399	5.31608	6.04308	3.97265	4.77775	4.41016	5.19768	4.95829	4.92621	5.17437	4.99432	3.52244	4.33367	3.78986	5.37221	4.52823	5.06442	5.22879	5.54532	3.43886	5.10181	5.14074	4.81648	4.73757	4.87864	6.10102	5.20348	5.50724	4.89509	0.206953
ENSG00000266098	0.203141	0	0.240059	1.29462	0	0.402599	0	0	0.194786	0	0.0998141	0.151302	0	0	0	0.963679	0.0862921	0	0.715861	1.16197	0	0.726533	1.1397	0	0.0318709	0	0.946831	0.789531	0.956856	0.747504	0.74541
ENSG00000230424	0.977749	0.504866	0.461755	0.0833093	0.197462	0.828207	0	0.217965	0.807475	0.356287	0.33234	0.488985	0.530993	0	0	0.388792	0.321039	0	0.957182	1.52684	0	0.593616	0.893226	0	0.326429	0.0121237	0.82019	0.789241	1.13821	0.595563	0.714917
ENSG00000127463	3.56648	3.2603	3.86016	3.5873	3.23312	3.59842	2.56388	4.21054	3.88631	3.35591	3.37208	3.93721	2.66225	2.71865	2.51641	3.7426	3.18731	3.21448	3.94504	4.14003	2.07675	3.76781	3.51744	3.23777	3.40593	3.09443	3.82238	3.70768	4.11353	3.73152	0.190674
ENSG00000053372	4.74258	4.51696	4.32924	4.47444	4.26994	4.82555	4.15801	5.21375	4.80088	4.2238	4.61443	5.0462	3.26783	3.62463	3.89975	4.47842	4.21061	4.02554	4.86278	4.88155	3.9946	4.04891	4.62474	4.42401	4.57345	4.32017	4.9796	4.43077	4.86046	4.66742	0.15226
ENSG00000211454	0.245536	0	0	0	1.37909	1.12423	0	0.802407	0.952476	2.17885	0	0.695905	0	2.22407	4.85167	0	0	0	1.12149	1.24608	3.28967	1.07242	0.709597	5.01817	0.0269487	4.44214	1.63116	0.605667	0.573281	0.396743	0.796811
ENSG00000162482	1.17526	2.22166	0.690481	0.723499	1.75343	2.79933	0	1.66769	2.16975	4.26267	1.07724	1.85348	0	5.22904	6.32777	0.973874	1.08766	0	1.88499	2.35714	7.34934	2.01543	1.81271	6.31078	1.15133	7.6674	2.24109	1.86668	1.78458	1.66588	0.710135
ENSG00000270728	0.702067	1.13973	0.561012	1.10714	1.81139	1.08123	0	1.56266	1.5613	1.10379	0.447772	1.77695	0	0.747085	0.125511	0.554522	1.07277	0.440538	1.69756	1.90686	0.272985	1.01637	0.922585	1.87589	0.21748	0.738518	1.3478	1.17865	1.30898	1.07099	0.50373
ENSG00000053371	5.74129	6.53757	5.61677	5.89354	5.21715	5.86757	4.93939	6.01654	6.82805	5.89217	5.79626	6.32188	4.6807	6.19232	5.38157	5.58945	5.47535	5.2572	5.92479	6.55522	5.0199	5.91148	5.85926	6.01904	5.62082	5.72006	6.2183	5.91885	6.28097	6.25263	0.152997
ENSG00000200403	0	0	0	0	0	0	0	0	0	0	0	0	0	0	0	0	0	0	0	0	0	0	0	0	0	0	0	0	0	0	NA
ENSG00000040487	3.71162	4.67405	3.43918	3.71759	3.88545	3.85661	2.90835	4.14208	4.19588	3.68883	3.47006	3.93681	2.40419	3.57854	3.83494	4.03215	3.61433	3.0301	4.3483	3.98711	3.18203	4.91322	4.34782	4.35618	4.21135	3.8111	4.96193	4.39496	4.27496	3.91184	0.222635
ENSG00000265192	0	0	0	0	0	0	0	0	0	0	0	0	0	0	0	0	0	0	0	0	0	0	0	0	0	0	0	0	0	0	NA
ENSG00000077549	7.13904	6.83389	7.7988	7.57839	6.25621	7.09673	7.8122	7.23516	7.72551	7.57098	7.54543	7.48485	6.15572	6.33574	5.29905	7.46279	6.60657	6.76592	7.18983	7.44946	4.78907	6.61496	7.46054	7.16223	7.32718	6.80424	7.60693	7.10758	7.69273	7.48576	0.101399
ENSG00000240490	0	0	0	0	0	0	0	0	0	0	0	0	0	0	0	0	0	0	0	0	0	0	0	0	0	0	0	0	0	0	NA
ENSG00000201609	0	0	0	0	0	0	0	0	0	0	0	0	0	0	0	0	0	0	0	0	0	0	0	0	0	0	0	0	0	0	NA
ENSG00000239027	0	0	0	0	0	0	0	0	0	0	0	0	0	0	0	0	0	0	0	0	0	0	0	0	0	0	0	0	0	0	NA
ENSG00000235185	0	0	0	0	0	0	0	0	0	0	0	0	0	0	0	0	0	0	0	0	0	0	0	0	0	0	2.13596	0	0	0	1
ENSG00000173436	4.43069	4.3718	4.95957	4.81021	4.64364	4.45375	3.36531	4.39701	5.14394	5.12152	5.11183	4.65829	4.80478	4.5715	3.12121	4.5302	3.99598	4.25272	4.50267	4.41982	2.89993	5.01937	5.16794	4.60305	4.15469	4.49673	4.15147	4.64095	4.80592	4.85766	0.137278
ENSG00000226396	2.84713	2.50417	2.91767	2.54911	2.07616	2.98574	2.543	2.74203	4.54375	3.12501	3.03473	3.25572	2.09815	3.30711	1.82824	3.73595	2.4746	0.87344	2.81866	4.76264	1.71966	4.00214	4.94881	3.35542	3.78177	2.32708	3.85426	3.52996	4.10769	4.13137	0.387994
ENSG00000158747	7.28718	4.12206	7.59878	7.90388	5.95768	7.55816	1.25177	7.31481	9.52932	7.65672	7.93725	8.06085	5.47487	5.87339	1.57528	8.2644	5.76576	3.54524	7.05442	9.51057	3.51522	7.02245	8.77423	8.08628	4.66163	6.75158	6.03246	6.74738	8.29465	8.75627	0.318419
ENSG00000158748	0	0	0	0	0.679626	0	0	0	0	0	0	0	0	0	0	0	0	0	0	0	0	0	0	0	0	0	0	0	0	0	1
ENSG00000162542	3.79503	4.07365	4.28129	4.76148	1.02079	4.20613	2.84878	3.26946	4.25365	3.7494	3.85596	4.07149	1.89719	3.98945	2.49865	3.6815	4.31209	0.895551	4.13359	4.1639	3.29618	3.31571	5.15419	3.6926	4.43535	3.97733	2.50548	4.99245	4.56716	4.22417	0.299094
ENSG00000178828	0	0	0	0	0	0.573412	0	0	0	3.35228	0	0	0	4.21941	0	0	0	0	0	0	4.61336	0	0	3.00549	0	0	0	0	0	0	0.916654
ENSG00000235434	1.47274	0	0	0	0	0.901906	0	0	0	0	0	0	0	1.45481	0	0	0	0	0	0	0	0	0	0	0	0	0	0	0	0	0.94482
ENSG00000169914	2.68466	2.92151	2.8713	3.3334	3.18571	3.21234	1.76669	3.12297	3.79325	3.41736	3.1203	3.72122	1.43152	2.47062	1.27456	3.47428	2.75231	1.96624	3.26836	3.97066	1.82908	3.4984	3.72592	3.35207	3.21744	2.80251	4.75184	3.26234	4.41533	3.4373	0.366491
ENSG00000188784	0	0	0	0	0	0	0	0	0	0	0	0	0	0	0	0	0	0	0	0	0	0	0	0	0	0	0	0	0	0	NA
ENSG00000242688	0	0	0	0	0	0	0	0	0	0	0	0	0	0	0	0	0	0	0	0	0	0	0	0	0	0	0	0	0	0	NA
ENSG00000188257	9.38367	3.25934	9.03048	9.56036	0	7.70573	2.48682	6.34276	5.6912	7.98071	8.00685	8.76167	9.15087	2.84035	9.38179	6.63898	7.75568	5.23645	9.63153	9.09759	3.11877	4.57449	8.44152	9.6564	1.25444	6.58203	4.61373	7.10731	4.73515	7.0122	0.338004
ENSG00000127472	2.57739	0.565474	4.45219	3.81065	2.27582	1.83625	0	0.319931	0.130331	4.17511	3.84602	3.13744	5.90947	0	1.82416	2.93551	0.925931	0	0.743759	6.77233	0	0	3.99614	1.24653	0.441516	2.24167	4.49014	1.59866	1.46006	1.05303	0.714899
ENSG00000117215	0	0	0	0	0	0	0	0	0	0	0	0	0	0	0	0	0	0	0	0	0	0	0	2.6048	2.80375	0	0	0	0	0	0.967964
ENSG00000158786	0	0	0	5.6884	0	0	0	4.26975	0	0	0	0	0	0	0	0	0	0	0	0	0	0	0	0	0	0	0	0	0	0	0.974117
ENSG00000227066	0	0	0	0	0	0	0	0	0	0	0	0	0	0	0.989189	0	0	0	0	0	0	0	0	0	0	0	1.37428	0	0	0	0.97518
ENSG00000187980	0	0	0	0	0	0	0	0	0	1.12421	0	0	0	0	0	0	0	0	0	0	0	0	0	0	0	0	0	0	0	0	1
ENSG00000225986	0	1.61519	0	2.72653	1.85792	0.424838	0	0	0.63259	5.77816	4.3446	1.25157	0	0.121449	0	0.2017	0.927358	0	0	0	0	1.79589	3.5102	3.57853	0	4.17011	3.43837	1.40717	2.57334	0.514152	0.790582
ENSG00000162543	0	0.907345	0	2.41138	1.46968	1.05776	0	0	2.37202	3.74734	3.13709	5.28024	0.637343	1.64617	1.57705	2.70987	0.651746	0	0	0.0181577	0	2.65702	2.03225	1.84515	0	2.10378	4.73926	2.74572	2.05663	0	0.735365
ENSG00000228105	0	0	0	0	0	0	0	0	0	0	0	0	0	0	0	0	0	0	0	0	0	0	0	0	0	0	1.91206	0	0	0	1
ENSG00000158816	0	0	0	1.20168	0	0	0	0	0	0	0	0.46784	0	0.760975	0	0	0	0	0	0	0	3.02245	0	0	0	0	3.08034	0	0	0	0.938957
ENSG00000226664	0	0	0	0	0	0	0	0	0	0	0	0	0	0	0	0	0	0	0	0	0	0	0	0	0	0	0	0	0	0	NA
ENSG00000236963	0	0	0	0	0	0	0	0	0	0	0	0	0	0	0	0	0	0	0	0	0	0	0	0	0	0	2.16911	0	0	0	1
ENSG00000226487	0	0	0	0	0	0	0	0	0	0	0	0	0	0	0	0	0	0	0	0	0	0	0	0	0	0	0	0	0	0	NA
ENSG00000162545	4.81248	5.75179	4.47452	5.99085	8.32645	5.17602	0.464807	5.27518	6.10128	6.66925	5.77738	5.28313	3.91868	6.45385	5.24345	7.04369	3.24569	2.12476	4.1622	5.92843	2.52154	6.06912	6.14107	6.57283	4.34922	4.79183	3.58247	4.61041	5.99822	5.69857	0.402682
ENSG00000090432	4.93786	4.83936	4.9226	5.45247	4.04784	5.03993	4.16804	5.39056	5.26365	5.19788	5.28222	5.3401	4.48786	4.67383	4.26754	4.88087	4.78904	4.84294	5.35413	5.11849	3.85681	4.9548	5.15436	4.79818	4.9384	4.78143	4.96767	5.07119	5.45999	5.05143	0.104006
ENSG00000215520	0	0	0	0	0	0	0	0	0	0	0	0	0	0	0	0	0	0	0	0	0	0	0	0	0	0	0	0	0	0	NA
ENSG00000183114	0.694414	4.99323	0	0	3.63766	0	0	0	0	0.424291	0.491243	1.34637	1.45665	1.08442	0	0	0	0	0	0	0	0.853134	0.824691	0	0.641832	0	0.426704	1.62489	1.01981	0.0571048	0.89929
ENSG00000158825	3.41082	2.23911	2.85914	2.84351	1.63559	2.99606	8.32477	4.82713	5.25924	4.03211	5.80705	3.9323	2.48751	4.075	5.7411	4.12603	4.65062	0.807217	3.46633	1.9154	0	1.46027	3.33203	4.93481	5.58913	1.86883	1.79583	3.54774	4.0866	6.26567	0.585814
ENSG00000158828	5.66636	6.89971	5.94279	5.96373	6.67107	5.60143	5.36302	5.64756	5.76155	5.8045	5.85894	5.46998	5.8929	5.3724	5.18774	5.26176	5.54132	7.33653	6.10909	5.42303	3.93314	5.40621	5.66885	5.14814	5.18772	5.31981	7.01857	5.91251	5.81738	5.68282	0.226666
ENSG00000257033	0	0	0	0	0	0	0	0	0	0	0	0	0	0	0	0	0	0	0	0	0	0	0	0	0	0	0	0	0	0	NA
ENSG00000244038	6.97068	7.31206	7.27423	7.2031	5.50444	7.05047	6.86026	7.60173	7.61149	6.83417	6.78806	7.59502	6.27676	6.59619	6.37769	7.48205	7.15015	5.60068	7.1245	7.77888	7.12729	7.50115	7.02465	6.98118	7.91162	7.10596	7.40998	7.65908	7.56715	7.21919	0.108303
ENSG00000117245	2.24878	3.65881	0.230466	0.564019	2.57906	2.05777	0	0.0245633	1.77273	0.37124	0.356032	2.81124	0.744247	1.30079	0	2.58319	0	0	1.03174	0.563407	0	1.14947	1.0886	0.305378	4.67358	0	5.99441	2.15249	1.84432	1.09214	0.797489
ENSG00000235432	0	0	0	0	0	0	0	0	0	0	0	0	0	0	0	0	0	0	0	0	0	0	0	0	0	0	0	0	0	0	NA
ENSG00000189410	0	0	0	0	4.16576	0	0	0.608719	1.1268	0	0	0	0	0.189514	0	0	0	0	0	1.00362	0	0	0.664184	0	0	0	3.75564	0.903629	0.59904	0	0.926733
ENSG00000233069	0	0	0	0	0	0	0	0	0	0	0	0	0	0	0	0	0	0	0	0	0	0	0	0	0	0	4.79489	0	0	0	1
ENSG00000127483	6.20746	5.76534	6.55054	6.51662	5.30181	6.17851	5.09022	6.11109	6.98656	6.29569	6.24554	6.38383	4.71193	5.30367	4.60549	6.41654	5.95661	5.14696	6.77106	7.1972	4.78113	5.8996	6.34659	6.11613	6.26868	5.7483	5.92985	6.86026	7.15006	6.87764	0.163833
ENSG00000075151	4.73016	4.54664	4.64275	5.12132	4.67058	4.62822	4.01563	4.87186	4.89191	4.77198	4.74578	4.92634	3.41268	3.83765	3.08292	4.67264	3.94884	4.6277	4.80735	4.72508	2.6287	5.3076	4.63149	4.41884	4.58905	4.04366	6.55808	5.48705	5.033	4.65431	0.313972
ENSG00000251914	0	0	0	0	0	0	0	0	0	0	0	0	0	0	0	0	0	0	0	0	0	0	0	0	0	0	0	0	0	0	NA
ENSG00000221808	0	0	0	0	0	0	0	0	0	0	0	0	0	0	0	0	0	0	0	0	0	0	0	0	0	0	0	0	0	0	NA
ENSG00000233072	0	0	0	0	0	0	0	0	0	0	0	0	0	0	0	0	0	0	0	0	0	0	0	0	0	0	0	0	0	0	NA
ENSG00000236073	0	0	0	0	0	0	0	0	0	0	0	0	0	0	0	0	0	0	0	0	0	0	0	0	0	0	0	0	0	0	NA
ENSG00000235112	0	0	0	0	0	0	0	0	0	0	0	0	0	0	0	0	0	0	0	0	0	0	0	0	0	0	0	0	0	0	NA
ENSG00000266867	0	0	0	0	0	0	0	0	0	0	0	0	0	0	0	0	0	0	0	0	0	0	0	0	0	0	0	0	0	0	NA
ENSG00000117298	6.96282	7.1937	7.08833	6.67557	3.95545	7.02096	6.01269	6.23544	7.06366	6.56353	5.75553	6.52271	5.47712	5.23108	5.13154	7.06477	5.58424	3.88661	7.01245	7.12463	5.7493	6.39264	6.59215	6.05984	6.3294	5.77291	5.49041	6.71916	6.63538	6.34687	0.144571
ENSG00000236936	0	0	0	0	0	0	0	0	0	0	0	0	0	0	0	0	0	0	0	0	0	0	0	0	0	0	0	0	0	0	NA
ENSG00000231105	0	0	0	0	0	0	0.129401	0	0	0	0	0	0	0	0	0	0	0	0.0937424	0	0	0.153417	0	0.206722	0.793886	0	1.98764	0	0	0	0.976108
ENSG00000236216	0	0	0	0	0	0	0	0	0	0	0	0	0	0	0	0	0	0	0	0	0	0	0	0	0	0	0	0	0	0	NA
ENSG00000228823	0	0	0	0	0	0	0	0	0	0	0	0	0	0	0	0	0	0	0	0	0	0	0	0	0	0	0	0	0	0	NA
ENSG00000236009	0	0	0	0	0	0	0	0	0	0	0	0	0	0	0	0	0	0	0	0	0	0	0	0	0	0	0	0	0	0	NA
ENSG00000227001	0.755442	1.05637	0.463361	2.03178	0.570638	1.28042	0	1.79106	1.39022	0.996409	0.865615	1.21404	0	0.486761	0	0.64791	0.985367	0	1.24583	1.76542	0	1.81411	1.20432	1.04265	0.881037	1.03861	3.22519	1.7687	1.47403	1.09037	0.702125
ENSG00000187952	0	1.12226	0	0.27752	0	0	0	0.69836	0.100843	0	0	0	0	0.114894	0	0	0.0515795	0	0.0416449	0.327865	0	0	0.233084	0	0.00841518	0	0.292551	0	0	0.0639783	0.932072
ENSG00000186543	0	0	0	0	0	0	0	0	0	0	0	0	0	0	0	0	0	0	0	0	0	0	0	0	0	0	0	0	0	0	NA
ENSG00000142794	1.32296	1.63	0.911009	2.3056	0.945264	1.83972	0	2.35006	2.01876	1.42466	1.22801	1.83771	0	1.05484	0	1.04635	1.5471	0	1.80853	2.02491	0.315979	2.08212	1.69844	1.58425	1.21933	1.52952	3.51993	2.17964	1.85936	1.60485	0.614324
ENSG00000176378	0	0	0	0	0	0	0	0	0	0	0	0	0	0	0	0	0	0	0	0	0	0	0	0	0	0	0	0	0	0	NA
ENSG00000162551	5.19431	6.62431	3.18729	2.51607	3.5456	5.5527	9.26458	3.17495	2.48435	2.69846	2.43531	4.83436	3.81516	4.8013	5.8576	7.08602	3.62917	0	3.75982	2.38508	1.82885	4.54041	4.0214	3.64458	6.79185	2.84856	3.50465	4.2931	3.56768	2.76419	0.585417
ENSG00000233431	0	0	0	0	0	0	1.15577	0	0	0	0	0	0	0	0	0	0	0	0	0	0	0	0	0	0	0	0	0	0	0	1
ENSG00000221781	0	0	0	0	0	0	0	0	0	0	0	0	0	0	0	0	0	0	0	0	0	0	0	0	0	0	0	0	0	0	NA
ENSG00000076864	0	6.12883	0	3.24019	6.88186	2.86884	2.16486	1.83271	2.48716	3.14037	1.95718	2.29476	2.21429	6.5401	4.42442	4.0774	5.03784	0	4.90956	1.2516	5.8475	5.79137	4.2303	4.4478	0.93298	6.70801	2.89215	8.41369	0.215643	2.16972	0.611932
ENSG00000090686	4.46468	5.16541	4.70266	4.74445	4.34681	4.60113	4.6708	4.6851	4.91291	4.37366	4.32858	4.69727	3.17185	3.51055	3.15538	4.63226	4.62243	3.10541	5.04736	5.14906	3.21202	4.78903	4.63832	4.60913	5.07767	4.23803	4.34678	5.00834	4.97169	4.69721	0.142102
ENSG00000231978	0	0	0	0	0	0	0	0	0	0	0	0	0	0	0	0	0	0	0	0	0	0	0	0	0	0	0	0	0	0	NA
ENSG00000187942	2.38097	0.679714	3.81884	2.38294	0	2.03498	0	0.567317	2.19646	2.45876	2.03625	2.86886	0.406625	0.10326	0	1.28631	2.503	0	3.21163	0.836334	0	0.657235	1.99216	1.53686	1.35268	1.53443	0.767811	1.74828	2.99569	1.84015	0.635394
ENSG00000142798	6.88859	5.38223	7.73586	7.0534	0.642289	6.44762	0.155362	5.92188	6.09727	6.73082	6.53961	6.74798	5.68649	4.73404	2.19161	5.75576	5.20474	4.5069	7.40856	5.18736	3.57891	3.74397	6.06802	5.56644	4.9747	5.88608	3.63556	6.39697	7.34112	6.06506	0.320052
ENSG00000232037	0	0	0	0	0	0	0	0	0	0	0	0	0	0	0	0	0	0	0	0	0	0	0	0	0	0	0	0	0	0	NA
ENSG00000219073	2.82988	0.630816	2.88241	1.076	0	1.62535	0.0812174	0.885073	1.99576	0.989167	1.07998	0.792736	0	0.721719	0.839305	0.477009	0.335818	0	4.26985	1.48329	13.3721	0.510162	2.13888	1.2237	1.25965	3.35711	2.23995	0.866654	0.979864	0.901665	0.905947
ENSG00000264385	0	0	0	0	0	0	0	0	0	0	0	0	0	0	0	0	0	0	0	0	2.90714	0	0	0	0	0	0	0	0	0	1
ENSG00000263991	0	0	0	0	0	0	0	0	0	0	0	0	0	0	0	0	0	0	0	0	6.01027	0	0	0	0	0	0	0	0	0	1
ENSG00000201919	0	0	0	0	0	0	0	0	0	0	0	0	0	0	0	0	0	0	0	0	4.42576	0	0	0	0	0	0	0	0	0	1
ENSG00000142789	4.28662	2.2074	3.80127	2.72745	1.31841	3.3393	1.55995	2.52178	3.69415	2.51861	2.73561	2.51573	1.47673	2.21764	2.54168	1.94647	1.95764	1.34029	5.7058	3.19567	14.7756	2.10531	3.8597	2.94168	2.9467	4.93338	2.52642	2.43159	2.66599	2.58285	0.811895
ENSG00000263582	0	0	0	0	0	0	0	0	0	0	0	0	0	0	0	0	0	0	0	0	3.45118	0	0	0	0	0	0	0	0	0	1
ENSG00000263929	0	0	0	0	0	0	0	0	0	0	0	0	0	0	0	0	0	0	0	0	7.31608	0	0	0	0	0	0	0	0	0	1
ENSG00000201273	0	0	0	0	0	0	0	0	0	0	0	0	0	0	0	0	0	0	0	0	5.81181	0	0	0	0	0	0	0	0	0	1
ENSG00000228397	0	0	0	0	0	0	0	0	0	0	0	0	0	0	0	0	0	0	0	0	0	0	0	0	0	0	1.22594	0	0	0	1
ENSG00000218510	4.60494	4.03905	4.29555	4.50589	3.32484	4.72845	3.74085	4.53831	4.43108	4.15032	3.98267	4.83838	3.08413	3.90343	3.39824	4.39374	4.21433	3.23424	4.9286	4.9241	6.141	4.76853	4.6649	4.28624	5.14257	3.89277	4.54785	5.13035	4.84214	4.34964	0.298743
ENSG00000070831	6.96313	6.4296	6.93046	7.1089	6.0445	6.9439	7.59093	7.1798	7.15561	6.77209	6.80222	7.07697	5.45898	5.98756	5.37337	7.14611	6.68703	5.4334	6.96408	6.85393	5.0742	6.16501	6.51767	6.79098	6.92655	6.42846	5.99511	6.72254	7.07917	7.08335	0.136471
ENSG00000230068	0	0	0	0	0	0	0	0	0	0	0	0	0	0	0	0	0	0	0	0	0	0	0	0	0	0	0	0	0	0	NA
ENSG00000271428	0	0	0	0	0	0	0	0	0	0	0	0	0	0	0	0	0	0	0	0	0	0	0	0	0	0	0	0	0	0	NA
ENSG00000271840	0	0	0	0	0	0	0	0	0.636493	0	0.184008	0	0	0	0	0.941907	0	0	1.08228	0.841598	0	0.0888154	1.06673	0	1.28301	0	0	0.369899	1.48762	0.962189	0.82715
ENSG00000162552	0	2.99169	0	2.53915	0	1.26953	0	4.51474	3.13619	0.851984	2.45677	3.69163	0	0.81384	0	0.204093	2.44605	0.0288433	0	5.00174	0.622454	2.96484	3.17055	1.90498	0	1.86276	0.391508	1.32492	2.99954	3.22921	0.700689
ENSG00000266564	0	0	0	0	0	0	0	0	0	0	0	0	0	0	0	0	0	0	0	0	0	0	0	0	0	0	0	0	0	0	NA
ENSG00000234397	0	0	0	0	0	0	0	0	0	0	0	0	0	0	0	0	0	0	0	0	0	0	0	0	0	0	0	0	0	0	NA
ENSG00000184677	3.92209	4.58591	4.711	4.44288	2.92026	4.06136	3.1263	3.81342	4.32353	4.05313	3.94875	4.62577	2.47585	3.30625	2.27218	4.29265	3.7608	2.79693	4.39904	4.6249	3.17396	4.43461	4.47076	4.6605	5.07822	3.82722	4.12449	4.52517	4.83123	3.88855	0.223191
ENSG00000237200	0.0615707	0	1.10677	0.669884	0	0.4407	0	0.10173	0.353108	0	0	0.218507	0	0	0	0.733014	0.176087	0	0.743618	0.909369	0	0.358967	0.638936	0.26618	0	0	0.0342391	0.801749	0.887905	0.670364	0.748696
ENSG00000070886	0	0.469989	0	0	0.0295399	0	0	0	0	0	0	0	0	0	0	0	0	0	0	0	0	0.841365	0	0	2.43992	0	2.20722	0	0	0	0.949855
ENSG00000173372	7.94831	7.47197	7.29369	6.8881	5.08404	6.83321	5.67049	4.28528	6.02215	6.72058	6.06922	7.22531	5.1018	6.21628	5.46105	8.74473	5.96244	3.22493	7.23773	5.90367	4.16378	6.22174	6.15974	7.38671	10.6033	6.03234	4.15883	5.91532	5.88614	5.60466	0.424724
ENSG00000159189	7.98435	7.69018	7.29812	7.10162	5.39826	6.85649	5.20059	4.23154	5.94441	6.7628	6.17425	7.27353	5.2443	6.1192	5.53094	8.45177	6.37249	3.22842	7.18339	5.95186	4.38665	6.22009	6.08426	7.55188	10.4488	6.0348	4.19342	5.81429	5.7443	5.4762	0.414207
ENSG00000173369	8.08166	7.8709	7.4513	7.20686	5.66713	6.99827	5.70278	4.06481	6.06307	6.89815	6.29891	7.58555	5.43945	6.26452	5.7705	9.0383	6.38383	3.2621	7.22737	6.04149	4.41061	6.53576	6.33617	7.5992	10.8438	6.19718	4.27887	5.99078	5.81194	5.54799	0.421167
ENSG00000133216	1.47461	1.11156	1.29662	1.99106	1.63681	1.27955	0	1.31432	2.08842	3.26957	0	2.72938	0.646398	1.20312	0	1.74966	0.743726	0	2.82598	3.76202	0.956462	2.49492	1.84506	3.71174	1.66747	0	1.95907	3.33073	1.34259	0.988565	0.599836
ENSG00000265422	0	0	0	0	0	0	0	0	0	0	0	0	0	0	0	0	0	0	0	0	0	0	0	0	0	0	0	0	0	0	NA
ENSG00000216157	0	0	0	0	0	0	0	0	0	0	0	0	0	0	0	0	0	0	0	0	0	0	0	0	0	0	0	0	0	0	NA
ENSG00000225952	0	0	0	0	0	0	0	0	0	0	0	0	0	0	0	0	0	0	0	0	0	0	0	0	0	0	0	0	0	0	NA
ENSG00000264014	0	0	0	0	0	0	0	0	0	0	0	0	0	0	0	0	0	0	0	0	0	0	0	0	0	0	0	0	0	0	NA
ENSG00000272796	0	0	0	0	0	0	0	0	0	0	0	0	0	0	0	0	0	0	0	0	0	0	0	0.91079	0	0	0	0	0	0	1
ENSG00000215906	0	0	0	0	0	0	0	0	0	0	0	0	0	0	0	0	0	0	0	0	0	0	0	0	0	0	0	0	0	0	NA
ENSG00000227868	0	0	0	0	0	0	0	0	0	0	0	0	0	0	0	0	0	0	0	0	0	0	0	0	0	0	6.98193	0	0	0	1
ENSG00000004487	5.4215	5.46591	5.45482	6.09669	5.01668	5.68237	5.02695	5.8661	6.17721	5.66234	5.59836	6.26277	4.20162	4.82645	4.02299	5.63107	5.81059	5.20407	5.84436	6.43876	4.56051	6.26921	5.96451	5.5337	5.53034	5.30504	7.56893	5.86576	6.3037	5.93126	0.266623
ENSG00000240553	0	0	0	0	0	0	0	0	0	0	0	0	0	0	0	0	0	0	0	0	0	0	0	0	0	0	0	0	0	0	NA
ENSG00000263793	0	0	0	0	0	0	0	0	0	0	0	0	0	0	0	0	0	0	0	0	0	0	0	0	0	0	0	0	0	0	NA
ENSG00000266802	0	0	0	0	0	0	0	0	0	0	0	0	0	0	0	0	0	0	0	0	0	0	0	0	0	0	0	0	0	0	NA
ENSG00000169641	3.72582	3.66092	3.54476	3.75207	3.17399	3.62202	1.95326	4.12768	3.86013	3.58718	3.57096	3.76998	2.99455	2.89931	1.10237	4.27978	3.19941	0.985793	3.41295	3.46366	1.36131	2.79361	3.75127	4.00693	3.49544	2.72286	4.37538	3.78615	4.02951	3.75729	0.256096
ENSG00000229010	0	0	0	0	0	0	0	0	0	0	0	0	0	0	0	0	0	0	0	0	0	0	0	0	0	0	0	0	0	0	NA
ENSG00000206935	0	0	0	0	0	0	0	0	0	0	0	0	0	0	0	0	0	0	0	0	0	0	0	0	0	0	0	0	0	0	NA
ENSG00000252578	0	0	0	0	0	0	0	0	0	0	0	0	0	0	0	0	0	0	0	0	0	0	0	0	0	0	0	0	0	0	NA
ENSG00000179546	0	0	0	0	1.06915	0	0	0	0	0	0	0	0	0	0	0	0	0	0	0	0	0	0	2.43207	0	0	0	0	0	0	0.984841
ENSG00000215381	0	0	0	0	0	0	0	0	0	0	0	0	0	0	0	0	0	0	0	0	0	0	0	0	0	0	2.15243	0	0	0	1
ENSG00000261326	2.79896	2.36024	3.19126	3.65419	2.36536	3.09896	0.8977	2.95547	4.13439	3.51171	3.15342	4.10759	1.27059	2.38098	1.85118	3.06677	3.43468	1.44318	4.47385	4.54301	2.26172	3.95408	4.30513	3.30984	3.51404	2.71725	3.29878	4.57334	4.528	3.98528	0.317125
ENSG00000125944	5.03408	4.75986	5.23457	5.16383	4.53526	5.16569	4.54346	5.20868	5.65082	4.84961	4.92475	5.54672	3.70102	4.09119	3.40707	5.30226	4.83114	3.93842	5.42966	5.73648	3.4597	4.88612	5.0138	4.86518	5.03665	4.47187	4.85123	5.2995	5.76496	5.34456	0.160905
ENSG00000125945	4.14326	4.55198	3.32797	4.54906	3.11859	4.25931	1.17407	4.30659	4.13145	3.71681	4.07147	4.1361	2.41838	2.43704	1.48737	3.15971	4.59801	2.3359	4.60253	5.09674	2.38009	3.10596	4.27469	3.19514	3.65049	3.06862	4.22514	4.37544	4.18559	4.29412	0.301238
ENSG00000249087	2.91793	3.36104	2.78327	3.57579	3.16829	3.01232	0.404239	2.53167	3.44508	3.05252	2.85563	3.75878	1.23203	2.30427	0.63477	2.26109	3.27304	1.825	3.95711	4.24528	1.33438	3.50605	3.97693	2.41243	3.03531	2.12568	3.86407	4.55956	3.83479	3.43446	0.378924
ENSG00000271420	0	1.87714	0	0	0	0	0	0.654396	0.0720621	1.18402	0	0.703632	0	0.0905042	1.15951	0	1.51461	1.13425	0	1.41895	1.6224	0	2.01968	0.552141	0	1.0148	0	1.14502	0.0325759	0.197703	0.754592
ENSG00000204219	3.76169	6.06355	5.04419	5.24475	1.72896	4.20965	0.712101	5.04254	5.04892	5.57558	4.62158	4.95193	4.49554	4.94086	5.68798	4.33372	6.06176	7.53519	4.69054	6.28769	6.19154	3.74746	5.69452	4.76431	3.10944	5.49227	2.46759	5.41298	4.71751	5.23067	0.380691
ENSG00000232482	0	0	0	0	0	0	0	0	0	0	0	0	0	0	0	0	0	0	0	0	0	0	0	0	0	0	0	0	0	0	NA
ENSG00000088280	5.03125	5.43906	4.30595	5.01159	3.30889	5.06045	0	5.73676	5.63372	4.45621	4.90745	5.37797	3.99999	4.09002	3.37813	4.70743	5.55602	4.83727	5.92081	6.60367	3.55477	4.75032	5.4578	3.79273	2.67663	4.67517	5.01545	5.64429	5.38612	5.64336	0.303649
ENSG00000007968	0	0	0	0	0	0	3.3643	2.21454	0.425671	1.55731	2.41253	0	0	0	0	0.995727	0.638668	0	0	0	0	0	0	1.86875	3.27233	0.14845	3.24712	0	0	1.91415	0.808381
ENSG00000235052	0	0	0	0.205518	0	0	0	0	0	0	0	0	0	0	0	0	0	0	0	0	0	0	0.0503057	0	0	0	1.4475	1.04304	0	0	0.969058
ENSG00000117318	7.41637	6.03058	8.73388	8.11767	4.88252	7.34049	4.90029	6.82162	7.18634	6.74677	7.09568	8.03654	6.71042	6.6975	4.44086	7.45781	5.64416	4.71794	7.82771	7.60556	4.84159	7.86867	7.5848	6.71089	6.06579	6.75242	4.00629	8.621	7.22841	7.18984	0.239795
ENSG00000197880	0	0	0	0	0	0	0	0	0	0	0	0	0	0	0	0	0	0	0	0	0	0	0	0	0	0	0	0.726827	0	0	1
ENSG00000229239	0	0	0	0	0	0	0	0	0	0	0	0	0	0	0	0	0	0	0	0	0	0	0	0	0	0	0	0	0	0	NA
ENSG00000142676	9.81741	8.78435	9.53218	9.54677	7.8209	10.0331	9.0435	10.0653	10.2107	9.34602	9.37872	9.79875	7.9874	8.7992	8.01204	9.48847	9.35384	8.15204	9.72562	10.9284	9.06085	9.07453	9.6379	9.36182	9.71437	9.4965	8.15116	9.58674	10.1226	9.97641	0.150966
ENSG00000203589	0	0	0	0	0	0	0	0	0	0	0	0	0	0	0	0	0	0	0	0	0	0	0	0	0	0	0	0	0	0	NA
ENSG00000244609	0	0	0	0	0	0	0	0	0	0	0	0	0	0	0	0	0	0	0	0	0	0	0	0	0	0	0	0	0	0	NA
ENSG00000011007	4.80528	4.04648	4.45081	4.80111	3.51511	4.71298	3.82097	5.04294	4.81632	4.27846	4.61912	4.75084	3.24534	3.69871	4.1064	5.07107	4.43501	4.2303	4.59476	4.84876	3.96728	4.36049	4.61327	4.39105	4.65982	5.03389	4.8311	4.8451	4.85258	4.71309	0.122219
ENSG00000236810	1.92835	2.18618	1.7904	2.15607	1.09426	2.07567	1.6059	2.0596	2.21636	1.43832	1.3298	2.24649	1.01883	1.40175	1.15833	1.62535	1.53813	0.144948	2.5123	2.77029	0.903404	2.50185	2.36436	1.59968	2.05999	1.31183	2.28695	2.33253	2.28302	1.96373	0.363512
ENSG00000057757	5.65903	5.5428	5.81879	5.77828	6.67635	5.73629	5.11261	6.10682	6.08503	5.54537	5.84558	5.85303	4.37521	4.87645	4.61581	5.65819	5.48729	5.39027	6.46624	5.9374	4.32405	5.94566	5.93036	5.34247	5.7485	5.3898	6.39474	5.77585	6.04371	6.25316	0.157919
ENSG00000011009	5.27858	5.40028	5.14748	5.92073	4.82794	5.51342	5.86527	5.82965	5.69665	5.48482	5.69559	5.93168	4.38022	6.07602	5.45731	5.92821	5.89596	4.56722	5.63413	5.40141	4.56188	5.59432	6.02065	5.91908	6.33921	5.56947	5.26413	5.99591	5.62562	5.80285	0.128106
ENSG00000117308	2.8469	3.41775	2.32149	4.33726	2.89232	3.25827	2.91303	3.13221	3.92979	4.0372	4.33342	3.61202	1.39275	4.3947	4.53234	4.39804	5.46708	0.711306	2.93949	2.80455	2.52342	3.56571	4.00862	4.44259	4.3848	5.56492	3.46046	2.90818	3.08072	4.55077	0.376654
ENSG00000117305	4.20994	5.13735	4.33097	4.69903	3.06157	4.25675	3.68687	4.21856	4.2744	4.50647	4.24167	4.30023	3.2393	5.03835	6.29518	4.24291	4.1484	3.80741	4.50507	4.06679	3.14223	4.32605	4.50383	4.27141	4.30701	4.41039	4.08686	4.8888	4.20954	4.25048	0.329709
ENSG00000179163	5.15958	5.466	5.51286	6.45439	3.22221	4.89045	4.64402	3.96332	5.33398	5.76455	4.42162	5.67283	3.3284	5.46218	4.81049	5.52165	5.97041	3.34724	4.77335	5.32161	3.88148	5.14145	5.39568	6.29874	6.22574	5.19465	5.39492	6.33699	5.14163	4.79629	0.217884
ENSG00000188822	0	0	0	0	0	0	2.16122	0	0	0	0	0	0	0	0	0	0	0	0	0	0	0	0	2.64055	4.12056	0	0	0	0	0	0.959817
ENSG00000264347	0	0	0	0	0	0	0	0	0	0	0	0	0	0	0	0	0	0	0	0	0	0	0	0	0	0	0	0	0	0	NA
ENSG00000238538	0	0	0	0	0	0	0	0	0	0	0	0	0	0	0	0	0	0	0	0	0	0	0	0	0	0	0	0	0	0	NA
ENSG00000229106	0	0	0	0	0	0	0.0799231	0	0	0	0	0	0	0	0	0	0	0	0	0	0	0	0	0.238338	1.5278	0	0	0	0	0	0.992817
ENSG00000232557	0	0	0	0	0	0	0	0	0	0	0	0	0	0	0	0	0	0	0	0	0	0	0	0	0	0	0	0	0	0	NA
ENSG00000264926	0	0	0	0	0	0	0	0	0	0	0	0	0	0	0	0	0	0	0	0	0	0	0	0	0	0	0	0	0	0	NA
ENSG00000230228	0	0	0	0	0	0	0	0	0	0	0	0	0	0	0	0	0	0	0	0	0	0	0	0	0	0	0	0	0	0	NA
ENSG00000189266	4.08625	3.67625	4.10308	3.98306	2.62726	3.94491	3.40697	3.44851	4.10109	3.86232	3.52484	3.98758	2.46129	3.32183	1.73004	4.24662	3.25095	2.301	3.83547	4.31838	1.99429	2.99577	3.65382	3.7099	3.59819	3.49489	2.64205	4.36985	4.30395	3.69146	0.208511
ENSG00000188529	2.7371	2.64639	2.86273	2.66355	1.30805	2.78941	2.42194	2.71283	2.95992	2.42171	2.341	3.0354	1.17443	1.72761	1.20333	2.80591	2.59119	1.50311	2.87889	3.13469	1.35811	2.32634	2.60143	2.53029	2.27936	2.22494	2.82101	3.25048	3.1695	2.71479	0.257988
ENSG00000215905	0	0	0	0	0	0	0	0	0	0	0	0	0	0	0	0	0	0	0	0	0	0	0	0	0	0	0	0	0	0	NA
ENSG00000225315	0	0	0	0	0	0	0	0	0	0	0	0	0	0	0	0	0	0.342812	0	0	0	0	0	0	0	0	0.676726	0	0	0	0.982532
ENSG00000142661	0	0	0	0	0	0	0	0.249931	0	0	0	0	6.06513	3.28414	0	0	2.58864	7.05337	0	0	0	0	1.34378	1.62552	0	0	3.23718	0	0	0	0.910073
ENSG00000230703	0	0	0	0	0	0	0	0	0	0	0	0	0	0	0	0	0	0	0	0	0	0	0	0	0	0	0	0	0	0	NA
ENSG00000142677	0.0589952	0	0	0.266808	0	0.642772	0	5.58446	2.56413	2.64984	3.46031	0.429505	0	1.28135	2.37447	0.99668	2.34398	0	0	0	7.3291	2.15261	0.687347	5.09783	0	1.13057	0.326745	1.53465	0	3.76277	0.824291
ENSG00000185436	0	1.58836	0	1.58299	1.51343	1.54923	1.31765	2.72724	1.40085	0.911026	1.34199	1.24897	0.488186	1.36291	2.46858	2.02348	2.60123	1.10453	0	1.1016	1.82879	3.43758	2.56084	3.11115	2.32708	1.05843	0.664023	2.84325	0.19165	1.99285	0.569561
ENSG00000230023	0	0	0	0	0	0	0	0	0	0	0	0	0	0	0	0	0	0	0	0	0	0	0	0	0	0	0	0	0	0	NA
ENSG00000221032	0	0	0	0	0	0	0	0	0	0	0	0	0	0	0	0	0	0	0	0	0	0	0	0	0	0	0	0	0	0	NA
ENSG00000266511	0	0	0	0	0	0	0	0	0	0	0	0	0	0	0	0	0	0	0	0	0	0	0	0	0	0	0	0	0	0	NA
ENSG00000232298	0	0	0	0	0	0	0	0	0	0	0	0	0	0	0	0	0	0	0	0	0	0	0	0	0	0	0.908918	0	0	0	1
ENSG00000158055	0	0	0	4.85396	0	0	0	5.63325	4.67292	0	5.87983	0	0	0	0	0	4.646	0	0	0	0	0	1.51541	0	0	0	1.91639	0	0	6.16951	0.837254
ENSG00000001460	1.2416	1.12655	0.487558	1.30848	2.12732	1.47945	0	1.49145	1.58137	1.47903	1.34202	2.55991	0	1.28226	0	1.64601	1.12013	0	1.00904	1.65185	0.0656435	2.6167	1.75706	1.30127	0.338961	0.790519	4.52686	1.83151	1.90189	1.63662	0.732065
ENSG00000001461	2.06776	2.7367	1.57678	2.67875	5.0927	2.64487	1.93565	3.37633	2.49616	3.32778	2.80854	2.79107	2.14633	2.69766	0.389967	3.14755	3.43009	0.480999	3.03896	2.42223	2.24696	3.0103	4.78708	3.07257	2.49505	3.01421	2.19181	4.03997	2.76662	2.99822	0.479871
ENSG00000117602	1.95175	0.0321276	0.860708	3.07005	3.51261	2.77495	2.12261	3.47696	2.49804	2.59177	3.14616	3.39931	0.682702	2.21675	0	2.98086	3.63879	0	3.32163	0.0880151	2.46372	3.72242	4.99601	3.33318	3.05143	3.01389	1.53864	3.80685	1.85571	3.31845	0.527416
ENSG00000266551	0	0	0	0	0	0	0	0	0	0	0	0	0	0	0	0	0	0	0	0	0	0	0	0	0	0	0	0	0	0	NA
ENSG00000264443	0	0	0	0	0	0	0	0	0	0	0	0	0	0	0	0	0	0	0	0	0	2.04263	0	0	0	0	0	0.716042	0	0	0.987912
ENSG00000184454	0	0	0	0.391758	0	0.98388	0	0	0	0	0	0	0	0.962372	0.325392	1.62854	3.42051	0	7.1555	0	2.7127	2.90511	1.61622	0.441796	0	2.55133	0	1.91339	0	0	0.904327
ENSG00000227312	0	0	0	0	0	0	0	0	0	0	0	0	0	0	0	0	0	0	0	0	0	0	0	0	0	0	0	0	0	0	NA
ENSG00000239106	0	0	0	0	0	0	0	0	0	0	0	0	0	0	0	0	0	0	0	0	0	0	0	0	0	0	0	0	0	0	NA
ENSG00000133226	5.88169	5.14163	6.04848	6.13763	5.33365	6.19151	5.11915	6.06794	6.68613	5.93298	5.78036	6.68257	4.58686	4.91126	4.10113	6.06243	5.71349	5.15721	6.91049	7.19116	4.28819	5.83464	6.4143	5.82414	5.95982	5.34779	6.18997	6.2112	7.11984	6.44292	0.194032
ENSG00000238986	0	0	0	0	0	0	0	0	0	0	0	0	0	0	0	0	0	0	0	0	0	0	0	0	0	0	0	0	0	0	NA
ENSG00000169504	7.80829	5.83116	9.52501	8.29972	5.49845	7.40382	4.35942	7.31733	8.11646	7.6357	7.74168	7.83933	6.83365	6.49691	4.6241	7.94981	6.33741	4.73136	8.63941	6.65466	4.34005	4.9097	7.25713	6.53545	5.6236	7.00906	5.35365	6.76138	8.41532	7.32468	0.298947
ENSG00000238482	0	0	0	0	0	0	0	0	0	0	0	0	0	0	0	0	0	0	0	0	0	0	0	0	0	0	0	0	0	0	NA
ENSG00000020633	2.31689	0.327548	2.18422	2.02498	0	2.72834	6.62232	3.67687	2.93347	1.53819	1.22391	1.88451	0	1.393	0.717754	4.16219	2.80715	0	0.784435	0	0	0.525388	1.7983	4.55425	5.87565	1.73452	2.36783	1.87198	1.06787	1.63992	0.728508
ENSG00000229162	0	0	0	0	0	0	0	0	0	0	0	0	0	0	0	0	0	0	0	0	0	0	0	0	0	0	0.490594	0	0	0	1
ENSG00000261025	0	0	0	0	0	0	0	0	0	0	0	0	0	0	0	0	0	0	0	0	0	0	0	0	0	0	0	0	0	0	NA
ENSG00000264371	0	0	0	0	0	0	0	0	0	0	0	0	0	0	0	0	0	0	0	0	0	0	0	0	0	0	0	0	0	0	NA
ENSG00000233755	0	0	0	0	0	0	0	0	0	0	0	0	0	0	0	0	0	0	0	0	0	0	0	0	0	0	0.590743	0	0	0	1
ENSG00000233419	0	0	0	0	0	0	0	0	0	0	0	0	0	0	0	0	0	0	0	0	0	0	0	0	0	0	0	0	0	0	NA
ENSG00000231953	0	0	0	0	0	0	0	0	0	0	0	0	0	0	0	0	0	0	0	0	0	0	0	0	0	0	1.74795	0	0	0	1
ENSG00000117614	5.51456	4.9693	5.93838	5.65694	4.16698	5.58673	4.80114	5.32877	5.91567	5.3939	5.19425	5.5725	3.88268	4.79085	3.4919	5.21517	5.04703	4.77375	5.64647	6.22125	4.0851	4.75138	5.22994	5.15903	5.27328	5.00725	4.71441	5.64243	5.84227	5.53646	0.178963
ENSG00000117616	5.53334	5.28616	5.98813	5.95443	5.20005	5.71888	5.192	5.39183	6.13187	5.7488	5.50664	5.95113	4.31418	5.43295	4.69327	6.29862	6.20652	3.74713	6.10428	6.14421	4.29679	6.61718	6.29535	6.07321	6.65444	5.35844	5.46131	6.69519	6.15885	6.01979	0.158018
ENSG00000272432	0	0	0	0	0.459343	0	0	0.119435	0	0	0	0	0	0	0	0	0	0	0.086608	0	0	0.449866	0.0553306	0	0.125307	0	2.1011	0.482372	0.164234	0.0416807	0.967436
ENSG00000261349	0.0878658	0	0.623513	0.703665	0.00125985	0.410949	0.749313	0.185419	1.59917	0.196669	0.0138635	1.10545	0	0	0	0.977763	1.40266	0	0.977614	1.82965	0	0.50629	1.09831	1.29783	1.67656	0	0.640992	1.36859	1.91215	1.33136	0.661245
ENSG00000187010	0	0	0	0	0	0	1.26717	0	0	0	0	0	0	0	0	0	1.94285	0	0	0.0243823	0	0	0	0	0.719723	0	0	0	0	0	0.964303
ENSG00000224183	0.247095	0	0.0287458	0	0	0.66543	0.206273	0.286249	0.905078	0	0	0.412696	0	0	0	0	0.115026	0	0.141819	0.93916	0	0	0.0414039	0	0.389211	0	0	0.682935	0.908546	0.587779	0.793716
ENSG00000259984	0	0	0	0	0	0	0	0	0	0	0	0	0	0	0	0	0	0	0	0	0	0	0	0	0	0	0	0	0	0	NA
ENSG00000183726	6.3826	6.48244	6.57383	6.23282	5.38928	6.27663	5.89965	6.54988	6.16269	6.09285	6.03683	6.0958	4.94465	5.37724	4.11311	6.39251	6.26052	4.20859	6.1984	5.77362	4.40702	5.10058	5.85167	5.81631	5.88715	5.52811	4.8301	6.21641	6.19333	6.20738	0.12449
ENSG00000252515	0	0	0	0	0	0	0	0	0	0	0	0	0	0	0	0	0	0	0	0	0	0	0	0	0	0	0	0	0	0	NA
ENSG00000238889	0	0	0	0	0	0	0	0	0	0	0	0	0	0	0	0	0	0	0	0	0	0	0	0	0	0	0	0	0	0	NA
ENSG00000188672	0	0	0	0	0.338931	0	1.97018	0	0	0	0	0	0	0	0	0	2.37963	0	0	0	0	2.16141	0	0	0.570002	0	2.04145	0	0	0	0.897376
ENSG00000238084	0	0	0	0	0	0	0	0	0	0	0	0	0	0	0	0	0	0	0	0	0	0	0	0	0	0	0	0	0	0	NA
ENSG00000266468	0	0	0	0	0	0	0	0	0	0	0	0	0	0	0	0	0	0	0	0	0	0	0	0	0	0	0	0	0	0	NA
ENSG00000204178	4.06071	4.61564	4.21326	4.09278	4.16718	4.04552	3.41795	4.12577	4.34593	3.94033	4.36631	4.12834	2.82118	3.21837	4.30957	4.28406	4.47722	4.746	4.15395	4.80892	4.32991	4.24138	4.34742	4.0385	4.14792	4.08306	5.19589	4.54163	4.36495	4.41692	0.197969
ENSG00000157978	3.75055	4.23426	4.57785	3.74667	4.94979	4.00286	3.966	4.15646	4.28507	3.9706	3.99682	3.83982	2.43004	3.68767	3.66568	4.52826	4.69402	2.71954	4.1225	3.94006	4.23181	4.70232	4.91258	4.40629	6.24989	3.86503	3.2207	4.88588	4.28269	4.53789	0.347245
ENSG00000225643	0.704755	0	2.35266	0.747594	1.2816	0.822839	0	0.563665	1.02693	0.505063	0.607179	0.448312	0	0	0	1.02249	0.466461	0	0.650491	0.711952	0.64738	0.338995	0.907647	0.170926	1.45021	0.0329483	0	1.03953	0.930342	0.677377	0.769085
ENSG00000117643	3.39555	3.09996	3.24671	3.52122	3.30684	2.763	0	2.24135	4.21382	2.91144	3.00275	3.57549	1.79017	3.43872	2.65955	3.30713	2.34458	0.363912	3.28804	4.0936	0.178101	4.24003	3.70955	2.45633	3.7421	2.63326	1.95447	4.42312	3.99931	3.66344	0.351835
ENSG00000233478	0	0	0	0	0	0	0	0	0	0	0	0	0	0	0	0.0153075	0	0	0	0	0	0	0	0	0.40258	0	0	0	0	0	0.998689
ENSG00000162430	6.53439	5.8767	6.09239	6.28673	5.18926	6.60172	3.34871	6.28357	6.53975	5.78829	6.04274	6.42178	4.94981	5.68962	3.67655	6.57247	6.01759	5.31843	6.55173	6.58411	5.17471	6.05889	6.5983	5.43299	6.01184	5.71917	4.65806	6.71117	6.6462	5.99325	0.133407
ENSG00000228172	0	0	0.12464	0.6208	0	0	0	0	0.333216	0	0	0.875218	0	0	0	0	0	0	0	0.172411	0	0	0	0	0	0	2.186	0	0	0	0.966459
ENSG00000117640	5.05455	6.70173	5.59883	5.82671	5.26137	5.15197	3.90176	5.04096	5.64485	5.69947	5.64278	5.65972	5.68953	5.30195	4.96119	5.08347	5.09351	5.71614	5.92746	6.29419	4.09769	5.78001	5.82474	5.37968	5.36337	5.26581	6.54568	5.88746	5.97465	5.42322	0.186557
ENSG00000223474	0	1.84494	0	0.2735	0	0	0	0	0	0	0	0.590749	0	0	0	0	0.180632	0	0.644176	0.732859	0	1.03875	0.00026099	0.459104	0	0	2.07038	0.951413	0.24534	0	0.88405
ENSG00000272478	0	0	0	0	0	0	0	0	0	0	0	0	0	0	0	0	0	0	0	0	0	0	0	0	0	0	0	0	0	0	NA
ENSG00000127423	0	0.590489	0	0	0.147444	0	1.40332	0.350615	0	0	0.520529	0	0	0	0	0	0	0	0	0	0	0	0	0	0.398651	0	4.81381	0	0	0.106711	0.974801
ENSG00000236528	0	0	0	0	0	0	0	0	0	0	0	0	0	0	0	0	0	0	0	0	0	0	0	0	0	0	0	0	0	0	NA
ENSG00000182749	3.10655	5.10645	3.44206	5.11879	2.94882	3.28006	2.54036	5.00782	4.49564	3.20724	3.98134	4.80374	1.18649	4.49696	1.76243	3.55392	3.08855	0.838455	4.29526	5.95147	2.10598	3.73873	3.99741	3.49906	4.23595	3.35373	6.56508	3.50785	4.81394	4.71752	0.442282
ENSG00000207302	0	0	0	0	0	0	0	0	0	0	0	0	0	0	0	0	0	0	0	0	0	0	0	0	0	0	0	0	0	0	NA
ENSG00000117632	3.93964	2.96616	3.9436	3.74746	7.02983	4.0388	5.02077	4.84458	4.33611	4.31796	4.26332	4.18982	2.2753	3.82717	1.33401	4.43881	3.71411	1.97626	6.5355	5.93665	1.76705	5.14715	3.48513	4.48765	4.59837	3.78734	7.32028	3.72846	5.44851	4.69771	0.435563
ENSG00000229786	0	0	0	0	0	0	0	0	0	0	0	0	0	0	0	0	0	0	0	0	0	0	0	0	0	0	2.50181	0	0	0	1
ENSG00000223624	0	0	0	0	0	0	0	0	0	0	0	0	0	0	0	0	0	0	0	0	0	0	0	0	0	0	1.3173	0	0	0	1
ENSG00000264021	0	0	0	0	0	0	0	0	0	0	0	0	0	0	0	0	0	0	0	0	0	0	0	0	0	0	0	0	0	0	NA
ENSG00000266763	0	0	0	0	0	0	0	0	0	0	0	0	0	0	0	0	0	0	0	0	0	0	0	0	0	0	0	0	0	0	NA
ENSG00000158006	2.86691	3.32116	2.66191	3.54379	2.01074	3.18202	2.87067	3.73566	3.14777	3.49755	3.09453	3.00458	1.93824	3.55977	3.20425	3.27793	3.61595	3.60874	3.61061	2.9189	4.22757	3.51184	3.37399	4.08053	3.59267	3.58416	4.00316	4.0901	3.19335	3.42934	0.220789
ENSG00000207237	0	0	0	0	0	0	0	0	0	0	0	0	0	0	0	0	0	0	0	0	0	0	0	0	0	0	0	0	0	0	NA
ENSG00000252190	0	0	0	0	0	0	0	0	0	0	0	0	0	0	0	0	0	0	0	0	0	0	0	0	0	0	0	0	0	0	NA
ENSG00000252691	0	0	0	0	0	0	0	0	0	0	0	0	0	0	0	0	0	0	0	0	0	0	0	0	0	0	0	0	0	0	NA
ENSG00000158008	0	0.804691	0	0	3.81196	0.7782	0	1.53166	0	0.437063	0	0.949135	0.871173	0	0	0	0	2.29124	5.96608	1.44382	0.658956	0.973868	0.185473	0	2.66427	0	0.83181	0	2.35608	0	0.880997
ENSG00000158014	0	0.627174	0	0.690072	0	0	0	0	0	0	0	0	1.01457	4.00504	0	0	0	1.36977	0	0	5.97965	0	0	0	0	0	0	4.24104	0	0	0.931102
ENSG00000158022	0.355314	0	0.501213	4.16552	0	0.361988	0.173823	1.04338	0.74638	0	0.639663	0.221037	6.75883	0.0947715	0	0.238487	3.44914	10.1091	1.22205	0	0	0	1.206	0.205428	0	0	0	0	2.88873	0.783681	0.914535
ENSG00000265320	0	0	0	0	0	0	0	0	0	0	0	0	0	0	0	0	0	0	0	0	0	0	0	0	0	0	0	0	0	0	NA
ENSG00000175087	1.8964	1.68397	1.70861	2.73215	2.35342	2.28001	1.49996	2.57961	2.44505	2.24727	2.26559	2.22981	0.397857	1.36513	1.82491	2.01627	2.6785	1.35614	2.31769	2.48739	1.9874	2.45298	2.21491	2.42044	2.3636	2.19857	2.82922	3.4356	2.51393	2.67858	0.377458
ENSG00000197245	4.74674	1.51979	3.15759	3.35815	1.2654	4.70487	0	2.49532	4.3662	2.96136	3.2753	4.88753	2.30807	2.35919	0	3.86001	2.59678	1.7703	4.33009	2.26743	1.39782	2.15656	3.44041	3.04404	1.35135	2.92599	1.47511	4.0699	4.52576	3.64645	0.439982
ENSG00000142684	0	0	0	0	0	0	0	0	0	0	0	0.138403	0	0	0	0	0	0	0.330763	0.893616	0	0	0	0	0	0	0	0	0.462127	0	0.964063
ENSG00000236782	0	0	0	0	0	0	0	0	0	0	0	0	0	0	0	0	0	0.219097	0	0.789533	0	0.129901	0	0	0	0	0.0434337	0.725278	0	0	0.951184
ENSG00000142675	0.630782	0	1.02101	4.28591	2.45603	4.06415	0.396999	4.1719	3.95364	3.42084	3.86878	4.02962	0.294749	3.2645	0.907867	4.12827	4.90157	5.31095	2.44956	2.9658	3.89719	4.4788	4.76152	4.08487	2.41229	3.99516	2.7818	5.52585	2.87782	4.33706	0.437443
ENSG00000188782	0	0	0	0	0	0	0	0	0	0	0	0	0	0	0	0	0	0	0	0	0	0	0	0	0	0	4.89	0	0	0	1
ENSG00000236155	0	0.85462	0	0	0	0	0	0	0	0	0	0.203869	0	2.08029	1.81995	0	0	0	0	0	0	1.76824	0	0	0	0	1.1368	3.66406	0	0	0.925994
ENSG00000130695	1.96543	2.11099	1.36165	2.6489	2.96843	2.37183	2.86751	3.35272	2.63715	2.43094	2.82567	2.48495	3.58799	2.46545	1.84346	3.00934	2.731	4.99319	4.60234	2.49088	1.62483	3.24227	2.32275	2.75609	3.21088	2.35408	5.6533	3.84507	2.68947	3.21903	0.505847
ENSG00000270733	0	0	0	0	0	0	0	0	0	0	0	0	0	0	0	0	0	0.510295	0	0	0	0	0	0	0	0	0	0	0	0	1
ENSG00000142669	7.57601	6.40187	7.76498	6.95783	6.15886	7.21786	9.53969	8.13213	7.24181	6.92453	7.39565	6.95363	5.60149	6.34678	5.27307	7.96707	7.01643	4.09531	7.18328	6.30324	5.66799	6.59327	6.5669	7.14427	8.18171	6.77384	5.09917	6.75645	6.66669	7.63619	0.292978
ENSG00000158062	4.4161	3.91517	3.62078	3.90914	4.05278	4.63155	5.17433	3.51282	4.51227	3.85827	3.80476	6.29491	2.71156	4.60824	2.82729	5.65222	4.16175	1.7175	4.38765	5.04754	3.21098	5.93359	4.80653	4.25307	5.99968	3.65551	6.05733	6.32962	5.00884	4.11416	0.314355
ENSG00000169442	4.8686	1.86773	2.95038	3.30711	0.926411	4.2655	8.0609	2.42774	2.45583	3.48675	2.94761	3.14391	1.4506	3.36567	2.5002	7.35261	3.45528	0	2.24183	1.2081	0.972263	1.97106	3.05888	7.25914	8.54232	3.1359	0.2544	4.00601	2.38381	3.11678	0.64299
ENSG00000176092	0	0	0	2.32792	0	0	0	4.74587	4.07512	0.751037	5.28796	0	0	0	0	0.879762	3.61835	0	0	0	0	0	0.587972	2.6159	0	0	2.52688	0	0	5.62004	0.831779
ENSG00000225854	0	0	0	0	0	0	0	1.70096	0.610142	0	1.25636	0	0	0	0	0	0	0	0	0	0	0	0	0	0	0	0	0	0	1.85222	0.933584
ENSG00000265143	0	0	0	0	0	0	0	0	0	0	0	0	0	0	0	0	0	0	0	0	0	0	0	0	0	0	0	0	0	0	NA
ENSG00000176083	0	0	0	0	0	0	2.34239	0	0	0	0	0.802582	0	0	0	0.881357	0	0	0	0	0	0	0.0225755	0	0.20185	0	6.92439	0.596007	0	0	0.975864
ENSG00000131914	0	0	0	0	0	0	0	0	0	0	0	0	0	0	0	0	0	0	0	0	0	0	0	0	0	0	3.61678	0	0	0	1
ENSG00000117682	5.02677	4.03061	4.36919	4.33355	4.73002	4.74986	3.18469	4.67194	4.2314	4.32636	4.22218	4.156	2.88238	3.76695	3.17918	4.10083	4.25231	2.62386	4.11894	3.9382	2.93446	4.63105	4.09828	4.22378	3.99019	3.90384	4.20598	4.31945	4.23058	4.18693	0.200193
ENSG00000223583	0	0	0	0	0	0	0	0	0	0	0	0	0	0	0	0	0	0	0	0	0	0	0	0	0	0	0	0	0	0	NA
ENSG00000225891	0	0	0.0465704	0.135117	0	0	0	0	0.49774	0	0	0.87872	0	0	0	0.036626	0	0	0.598425	1.66657	0	1.38513	0.477763	0.193075	0.752559	0	3.25902	1.041	1.42572	0.450696	0.898576
ENSG00000198830	6.87841	6.61241	7.3175	7.00697	6.05693	7.13647	7.38113	7.15572	7.70453	6.97167	6.90141	7.61113	5.33269	6.36475	5.2834	7.36655	6.68573	5.84715	7.44488	8.00014	5.78435	7.56707	7.27271	7.01956	7.39824	6.4679	6.86982	7.68327	7.74963	7.31316	0.137148
ENSG00000224129	0	0	0	0	0	0	0	0	0	0	0	0	0	0	0	0	0	0	0	0	0	0	0	0	0	0	0	0	0	0	NA
ENSG00000117676	3.47602	4.2206	2.40119	3.91143	3.69175	3.87541	7.62308	4.22244	3.65427	4.77412	3.47443	4.19755	1.16452	4.7369	2.76309	6.07049	4.84703	0.255192	3.57763	1.77116	3.50271	4.47918	4.83982	6.22269	6.4846	4.47683	3.44584	5.59169	2.51537	3.93579	0.490749
ENSG00000238705	0	0	0	0	0	0	0	0	0	0	0	0	0	0	0	0	0	0	0	0	0	0	0	0	0	0	0	0	0	0	NA
ENSG00000243905	0	0	0	0	0	0	0	0	0	0	0	0	0	0	0	0	0	0	0	0	0	0	0	0	0	0	0	0	0	0	NA
ENSG00000252802	0	0	0	0	0	0	0	0	0	0	0	0	0	0	0	0	0	0	0	0	0	0	0	0	0	0	0	0	0	0	NA
ENSG00000229247	0	0	0	0	0	0	0	0	0	0	0	0	0	0	0	0	0	0	0	0	0	0	0	0	0	0	0	0	0	0	NA
ENSG00000238316	0	0	0	0	0	0	0	0	0	0	0	0	0	0	0	0	0	0	0	0	0	0	0	0	0	0	0	0	0	0	NA
ENSG00000235069	0	0	0	0	0	0	0	0	0	0	0	0	0	0	0	0	0	0	0	0	0	0	0	0	0	0	0	0	0	0	NA
ENSG00000260063	0	0	0	0	0	0	0	0	0	0	0	0.644094	0	0	0	0	0	0	0.0532978	0.190513	0	0.534613	0.0135683	0	0.12737	0	2.52662	1.19695	0.0697614	0	0.961374
ENSG00000117713	4.7981	4.58597	5.05158	5.42562	4.09472	4.95688	4.68608	4.98866	5.21656	4.82601	4.84989	5.3906	3.58401	3.99515	3.56312	5.15846	4.93723	4.04328	5.45808	5.41392	3.63912	4.78316	4.92363	5.06442	5.53029	4.69276	5.30251	5.61436	5.41857	5.11379	0.143255
ENSG00000266138	0	0	0	0	0	0	0	0	0	0	0	0	0	0	0	0	0	0	0	0	0	0	0	0	0	0	0	0	0	0	NA
ENSG00000060642	3.12065	4.01041	3.07418	4.01962	2.50321	3.46571	2.90413	3.91398	3.77376	3.23828	3.31863	3.71824	1.3434	2.7737	3.58288	3.32048	3.55778	1.4013	3.61681	3.78902	2.45903	3.89205	3.68768	3.20521	3.29566	3.16387	5.76007	4.0056	3.94015	3.68751	0.426593
ENSG00000241188	0	0	0	0	0	0	0	0	0	0	0	0	0	0	0	0	0	0	0	0	0	0	0	0	0	0	0	0	0	0	NA
ENSG00000204160	4.60636	2.98324	4.12885	4.42474	3.60642	4.50023	7.09869	4.24088	4.30716	4.14048	4.34584	4.31956	2.82979	3.2779	3.44916	4.75323	4.37536	2.42716	4.17215	4.04329	2.47077	4.25069	4.32609	4.27098	5.69977	3.74692	3.78518	4.87408	4.58973	4.45535	0.429708
ENSG00000175793	2.19675	0.183996	2.36661	6.27391	2.28868	4.64478	1.283	10.3722	8.8335	6.26096	10.4198	2.65584	0	4.02804	1.79737	6.93963	8.98954	0.977507	1.24423	0.699765	0.794817	1.92701	7.17267	6.03234	0.76987	6.371	0.986129	2.17506	1.45363	10.2415	0.636103
ENSG00000142751	3.79662	4.24021	3.9673	4.28473	3.6328	3.90803	3.50565	4.28731	4.12004	3.87668	3.92779	4.10446	2.56505	3.39835	3.14158	3.9773	3.79473	3.0214	4.22768	4.10784	2.82248	4.26109	4.35075	4.04433	4.39696	3.7323	4.00317	4.19735	4.29701	3.96764	0.125088
ENSG00000198746	3.72346	3.84767	3.67663	4.01978	3.38277	3.88057	3.45716	4.21906	3.96609	3.71028	3.70091	3.91005	2.3643	3.15824	2.89303	3.78512	3.57162	3.75474	4.19332	3.77042	2.39133	3.74132	3.87896	3.80334	4.30205	3.55502	4.54058	3.97541	4.19752	3.84754	0.189852
ENSG00000090273	6.26976	7.13917	6.8388	6.61853	6.44671	6.39573	5.6647	6.41181	6.8254	6.5927	6.46691	7.0716	5.79978	5.88644	5.9606	6.54654	5.91573	6.08274	6.86848	6.76641	5.33081	6.71624	6.66184	5.91505	6.36555	6.34348	7.07794	6.67133	6.93692	6.47026	0.101998
ENSG00000131910	0	4.69512	0	0	0	0	0	0	0	0	0	0	2.99508	4.7811	6.49957	1.45201	0	0.870496	0	0	4.27268	0	0	2.92428	4.26287	4.9522	1.4253	0	0	0	0.826879
ENSG00000175707	0	0.8089	0	3.74246	0	3.29886	0	4.38641	2.5996	2.76243	3.55849	2.6382	0	3.54405	1.66489	3.09261	4.35876	0	0	0	3.55761	4.34604	3.87381	3.53719	0.298716	3.7786	2.65498	4.56364	0	3.88411	0.528608
ENSG00000172746	0	0	0	0	0	0	0	0	0	0	0	0	0	0	0	0	0	0	0	0	0	0	0	0	0	0	0	0	0	0	NA
ENSG00000224064	0	0	0	0	0	0	0	0	0	0	0	0	0	0	0	0	0	0	0	0	0	0	0	0	0	0	0	0	0	0	NA
ENSG00000225294	0	0	0	0	0	0	0	0	0	0	0	0	0	0	0	0	0	0	0	0	0	0	0	0	0	0	0	0	0	0	NA
ENSG00000253368	3.96172	2.40552	5.18993	5.44593	4.94072	4.00054	0	6.21874	5.05406	4.24681	6.03163	5.13181	4.13662	4.52669	1.86618	4.15701	3.22153	0.701852	5.00371	2.98309	3.87514	4.57587	4.23368	3.30706	3.11322	6.34932	2.199	3.06985	4.95613	4.99665	0.383313
ENSG00000158246	3.68758	0.412673	6.7613	6.4137	0	5.05581	0	7.14747	5.72864	5.862	7.24077	5.42058	4.40939	2.60246	0	4.84046	5.42501	0.853824	3.9637	2.97634	0.00696325	2.38898	4.74601	4.32929	0.288802	4.88398	3.91271	3.52044	5.50835	6.47413	0.487478
ENSG00000090020	3.96993	4.39585	4.38292	5.50251	3.92875	4.3356	4.22495	4.53784	4.7665	4.89936	4.12108	4.27926	3.64155	3.51672	1.47605	4.93892	4.96973	1.88028	3.78811	4.08264	2.69576	4.51049	4.74017	4.64453	4.7216	5.56683	4.4118	4.52907	4.78997	4.48512	0.249452
ENSG00000229985	0	0	0	0	0	0	0	0	0	0	0	0	0	0	0	0	0	0	0	0	0	0	0	0	0	0	0	0	0	0	NA
ENSG00000214973	0	0	0	0	0	0	0	0	0	0	0	0	0	0	0	0	0	0	0	0	0	0	0	0	0	0	0	0	0	0	NA
ENSG00000225159	0	0	0	0	0	0	0	0	0	0	0	0	0	0	0	0	0	0	0	0.312178	0	0	0	0	0	0	0	0	0	0	1
ENSG00000225990	0	0	0	0	0	0	0	0	0	0	0	0	0	0	0	0	0	0	0	0	0	0	0	0	0	0	0	0	0	0	NA
ENSG00000224311	0	0	0	0	0	0	0	0	0	0	0	0	0	0	0	0	0	0	0	0	0	0	0	0	0	0	1.95257	0	0	0	1
ENSG00000142784	5.21869	5.51384	5.68838	5.87021	5.19608	5.50238	6.05261	5.55244	5.89197	5.57463	5.53693	5.70511	5.06456	4.93619	4.15484	5.60676	5.41976	5.81672	5.78526	5.83352	4.31123	5.56315	5.76669	5.36079	5.63953	5.35124	6.69949	5.90256	6.0878	5.6719	0.178652
ENSG00000252098	0	0	0	0	0	0	0	0	0	0	0	0	0	0	0	0	0	0	0	0	0	0	0	0	0	0	0	0	0	0	NA
ENSG00000243659	0	0	0	0	0.923525	0	0	0	0	0	0	0	0	0	0	0	0	0	0	0	0	1.04805	0	0	0.0640712	0	0	0	0	0	0.967506
ENSG00000186501	5.03333	5.1711	5.30183	5.34522	5.32072	5.23214	4.59107	5.22024	5.51902	5.03518	5.26932	5.68822	4.0421	4.90023	4.53525	5.21819	5.00769	4.17776	5.9637	5.67173	3.95552	5.84993	5.98274	5.00839	5.44444	4.94169	5.70164	5.76667	5.73436	5.3685	0.135356
ENSG00000206888	0	0	0	0	0	0	0	0	0	0	0	0	0	0	0	0	0	0	0	0	0	0	0	0	0	0	0	0	0	0	NA
ENSG00000241547	0.59989	0.300163	0.663822	0.86383	0.256409	0.707181	0.300711	1.40592	1.45857	0.404077	0.792269	1.61891	0	0.00313205	0	1.1161	0.984557	0	1.04754	1.79804	0	1.29527	1.03028	0.851409	0.717632	0.485739	0.686199	1.4271	1.43892	1.25369	0.583658
ENSG00000142765	1.9757	0	0.978538	6.25951	4.20269	4.14021	6.16429	6.39963	5.37445	2.56455	5.87125	5.16608	0	2.45743	0.96142	5.06699	6.07568	0	0.882587	0.780832	5.95326	4.98442	6.93316	5.25683	6.5896	5.47246	1.97523	4.66479	1.60276	6.6483	0.460516
ENSG00000142733	6.44522	4.37965	6.33701	6.18956	3.627	6.53524	1.67288	6.50602	6.75454	5.4389	6.3603	6.44848	5.08263	5.14279	2.68757	6.9726	5.72823	4.07457	6.73553	5.1058	3.35426	4.96057	6.23615	4.94456	5.19361	5.10437	4.23798	6.19018	6.50739	6.71773	0.234943
ENSG00000142748	5.98509	5.57144	2.78016	2.4162	0	5.91518	0	1.14911	1.9458	2.33953	2.99648	3.18103	4.81347	5.49874	6.72157	10.471	2.16657	2.77351	2.31514	1.65326	3.1206	3.8968	3.38037	3.41258	4.25527	3.30858	2.54422	5.41236	2.68261	1.89866	0.69
ENSG00000174950	0	0	0	0	0	1.81031	0	3.21219	2.93258	0	3.17257	5.08336	0	0	0	3.12123	3.32753	0	0	0	0	2.24615	2.43373	0	0	0	0.0189052	0	0	3.70971	0.823732
ENSG00000231207	0	0	0	0	0	0	0	0	0	0	0	0	0	0	0	0	0	0	0	0	0	0	0	0	0	0	0	0	0	0	NA
ENSG00000181773	1.44736	0.0967638	0.193671	0.559203	2.11523	1.2821	0	0.681587	0.547163	0.270141	0.237077	1.21385	1.6364	0.307349	0	2.25071	0	0	0	0	0	3.13661	1.04975	0	0	0.393038	0	2.04343	0.458863	0	0.815486
ENSG00000158195	6.55593	5.7668	7.06834	6.75693	4.63502	6.52584	6.54662	6.65211	6.67398	6.39254	6.94224	6.81272	4.70987	5.36047	3.66819	6.71183	6.08335	3.88618	6.95971	6.91101	4.84494	5.21005	6.14345	6.24281	6.54719	5.93782	6.1175	6.29466	7.07882	6.41156	0.145729
ENSG00000241169	0	0	0	0	0	0	0	0	0	0	0	0	0	0	0	0	0	0	0	0	0	0	0	0	0	0	0	0	0	0	NA
ENSG00000237429	0	0	0	0.806898	0.128201	0	0	0	0.740767	0.781329	0.487706	0.183545	0	0	0	0.552504	0	0	0	0	0	2.08844	0.935884	0.0743834	0.541699	0	0.359727	0	1.15182	0.401233	0.882016
ENSG00000126705	4.31951	5.07046	5.53781	5.09178	4.43133	4.68085	1.89024	5.31203	5.74536	4.50135	5.29298	5.64089	3.74043	3.87453	2.45541	4.61837	4.73756	4.56167	5.27638	5.64225	2.64408	5.20469	4.63574	3.72536	4.96284	4.03887	4.57339	5.57838	5.95657	5.56005	0.228065
ENSG00000000938	5.0652	2.94835	3.61461	3.51471	2.32532	4.57636	9.07923	2.25143	3.93599	3.03032	2.98854	4.97083	2.32182	2.84593	2.79339	7.20689	3.29706	1.13431	4.13693	2.30264	1.50075	2.18998	3.51823	3.74995	7.71401	2.85924	2.34467	3.7708	4.14864	3.65793	0.617487
ENSG00000235912	0.309104	0.443135	0.406911	0	0.482417	0.383579	0	0.423399	0	0.0851575	0.19201	0.296462	0.0399602	0.0103502	0	0.639686	0.194125	0.125012	0.588285	0.686556	0	1.08854	0.226064	0.299956	0.50845	0.0583699	2.00785	0.767491	0.34218	0.471766	0.84425
ENSG00000233975	0	0	0	0	0	0	0	0	0	0	0	0	0	0	0	0	0	0	0	0	0	0	0	0	0	0	0	0	0	0	NA
ENSG00000126709	6.98941	7.7022	7.74728	6.33268	7.1902	6.85491	7.3883	6.00806	7.03	6.46202	6.25139	6.72186	6.17428	8.28666	6.54213	8.01493	6.59844	4.03566	7.58388	7.26122	4.89672	9.24408	6.56801	6.21029	7.05856	6.25861	7.14095	8.38353	7.16244	6.46145	0.263961
ENSG00000225886	0	0	0	0	0	0	0.639591	0	0	0	0	0	0	0.12894	0	0.341568	0	0	0.196496	0	0	0.491859	0	0	0	0	0	0.32418	0	0	0.920043
ENSG00000206767	0	0	0	0	0	0	0	0	0	0	0	0	0	0	0	0	0	0	0	0	0	0	0	0	0	0	0	0	0	0	NA
ENSG00000226662	0	0	0	0	0	0	0	0	0	0	0	0	0	0	0	0	0	0	0	0	0	0	0	0	0	0	0	0	0	0	NA
ENSG00000207095	0	0	0	0	0	0	0	0	0	0	0	0	0	0	0	0	0	0	0	0	0	0	0	0	0	0	0	0	0	0	NA
ENSG00000009780	3.56082	2.21305	3.61981	3.38279	2.87141	3.47626	1.68125	3.3406	3.84744	3.35733	3.25618	3.83538	1.94005	2.47746	1.60616	3.52527	2.84679	2.41401	4.01937	3.62879	1.89793	3.67994	3.57794	3.06783	3.24719	2.7183	4.40242	4.01977	4.05154	3.60601	0.289053
ENSG00000231344	0	0	0	0	0	0	0	0	0	0	0	0	0	0	0	0	0	0	0	0	0	0.563354	0	0	0	0	0	0	0	0	1
ENSG00000230833	0	0	0	0	0	0	0	0	0	0	0	0	0	0	0	0	0	0	0	0	0	0	0	0	0	0	0	0	0	0	NA
ENSG00000117758	6.02705	4.92869	5.73826	5.55816	5.48219	5.87132	4.30139	5.38338	5.51177	5.21476	5.32012	5.54927	3.79403	4.55695	3.47812	6.51279	5.25228	3.91043	5.84699	5.13506	3.63881	5.47924	5.3114	4.94644	5.28223	6.10545	4.2459	6.94757	5.68553	5.35367	0.258377
ENSG00000269971	0.267345	0	0	0	0	0	0	0	0	0	0	0	0	0	0	1.02025	0	0	0	0	0	0.59043	0.528178	0	0.337326	0	0	2.0573	0.188485	0.234825	0.94692
ENSG00000270031	0.722651	0	1.03368	0.36728	0.329907	0.468353	0	0	0.55065	0.421455	0.529886	0.618615	0	0.254872	0	1.81903	0.132421	0	1.03094	0.527844	0	1.23331	1.10912	0.505739	1.28087	1.0409	0	2.77771	1.33483	0.763253	0.800436
ENSG00000223062	0	0	0	0	0	0	0	0	0	0	0	0	0	0	0	0	0	0	0	0	0	0	0	0	0	0	0	0	0	0	NA
ENSG00000117751	4.84718	4.23305	5.03367	5.08089	4.4278	4.8875	4.34204	5.18279	5.19588	4.69633	4.78121	5.21018	3.35199	3.83969	3.27622	4.58683	4.4598	3.73821	5.13222	5.06201	3.17228	4.59052	4.68434	4.59546	4.80699	4.24833	4.93854	4.84759	5.35124	4.89497	0.148476
ENSG00000252947	0	0	0	0	0	0	0	0	0	0	0	0	0	0	0	0	0	0	0	0	0	0	0	0	0	0	0	0	0	0	NA
ENSG00000130775	4.48883	3.3796	3.76735	3.4188	2.24185	3.79842	7.59804	2.0327	3.47296	3.48306	2.75752	3.97746	1.76542	3.39796	1.99794	6.01292	3.70843	0.806343	4.02347	2.26897	1.21247	3.01105	3.08607	5.05551	7.29269	2.89241	4.54184	4.11998	2.85503	3.30569	0.554455
ENSG00000117748	5.38555	4.92123	5.43938	5.59704	5.10807	5.50557	5.88898	5.39819	5.74375	4.96453	5.023	5.75496	4.24139	4.62968	3.84239	5.38387	5.01474	5.56248	5.73653	6.08483	3.65881	5.74121	5.2172	5.18846	6.00269	4.75122	6.56297	5.83724	5.70296	5.47143	0.197182
ENSG00000130768	0	0	0	0.932348	0.0466374	1.46624	0	0	0	2.77353	0	1.57295	0	1.71659	0	2.82716	3.08675	0	0	0	3.697	0.415849	1.4609	2.91058	0.964983	3.32822	0.628847	3.94591	0	0	0.75681
ENSG00000227050	0	0	0	0	0	0	0	0	0	0	0	0	0	0	0	0	0	0	0	0	0	0	0	0	0	0	0	0	0	0	NA
ENSG00000158156	2.91842	2.78964	3.37817	3.49526	3.24278	2.92066	5.05607	2.98191	3.41189	3.31399	3.15935	3.72699	2.04757	2.98665	3.48068	3.59944	3.35685	2.14732	3.20966	3.40786	3.44995	3.25155	3.77861	3.40788	4.18419	3.65789	3.27296	3.91046	3.83163	3.39803	0.347195
ENSG00000158161	3.13659	2.83707	3.28496	3.32351	3.07457	3.25683	3.46013	3.70002	3.55723	3.10816	3.39627	3.45945	2.30306	3.5884	2.16972	3.73767	3.25488	2.58919	3.60468	3.64021	2.28052	3.91792	3.58983	3.42937	3.75956	2.77835	4.74113	4.05518	3.82489	3.66675	0.303346
ENSG00000238231	0	0	0	0.391968	0	0.258708	0	0	1.08882	0	0	0	0	0.0217504	0	0.616131	0.410798	0	0.518624	0.337515	0	0	0.670171	0	0	0	0.321949	0.475948	0.502292	1.21212	0.840272
ENSG00000240750	0	0	0	0	0	0	0	0	0	0	0	0	0	0	0	0	0	0	0	0	0	0	0	0	0	0	0	0	0	0	NA
ENSG00000228589	0.0596895	0.0773284	0.416402	0	0	0.123277	0.259735	0	0	0	0	0	0	0	0	0.607165	0	0	0.657386	0.116258	0	0.0156153	0	0	0.358412	0	0.353496	0.743875	0.262778	0	0.846677
ENSG00000228943	0	0	0	0	0	0	0	0	0	0	0	0	0	0	0	0	0	0	0	0	0	0	0	0	0	0	0	0	0	0	NA
ENSG00000214812	0	0	0	0	0	0	0	0	0	0	0	0	0	0	0	0	0	0	0	0	0	0	0	0	0	0	0	0	0	0	NA
ENSG00000253005	0	0	0	0	0	0	0	0	0	0	0	0	0	0	0	0	0	0	0	0	0	0	0	0	0	0	0	0	0	0	NA
ENSG00000252429	0	0	0	0	0	0	0	0	0	0	0	0	0	0	0	0	0	0	0	0	0	0	0	0	0	0	0	0	0	0	NA
ENSG00000169403	2.74508	1.5865	1.70363	2.08756	0.742748	2.0253	6.32795	1.50702	1.35742	1.86193	2.41759	2.5732	0	1.95203	0	4.09234	1.90687	0	1.6389	0.291079	0.185645	0.448685	1.47295	2.90336	4.58088	1.50449	1.11366	1.40963	0.938025	1.78862	0.744782
ENSG00000126698	6.13328	5.70414	6.50771	6.14304	5.78499	6.17385	5.55127	6.05594	6.51985	6.00812	5.965	6.2174	4.85016	5.37722	4.50546	6.12978	5.51562	4.99261	6.38611	6.3919	3.97028	5.68761	5.92241	5.72335	6.01426	5.46589	5.63497	6.24777	6.62238	6.10848	0.126845
ENSG00000215902	0	0	0	0	0	0	0	0	0	0	0	0	0	0	0	0	0	0	0	0	0	0	0	0	0	0	0	0	0	0	NA
ENSG00000130770	5.20412	6.07585	5.71084	5.74856	6.519	5.50393	5.65717	5.92162	5.97123	6.07919	5.71456	6.24521	6.31864	6.79171	5.87255	5.91581	5.7724	5.97946	6.09728	6.4023	4.89508	7.00984	6.34791	6.29675	6.29089	5.98613	7.22751	6.91196	6.13233	6.07916	0.162913
ENSG00000270605	0.645692	2.39681	0.294775	2.17432	1.86218	1.38845	2.54871	1.14862	2.14021	1.7	0.813089	4.04559	1.05791	2.60185	2.45747	2.65212	2.01133	2.59665	2.18334	2.06192	1.50614	3.76482	2.71235	2.96715	4.09069	2.00568	1.61853	2.89879	1.6867	1.30908	0.500546
ENSG00000271398	0	0	0	0	0	0	0	0	0	0	0	0	0	0	0	0	0	0	0	0	0	0	0	0	0	0	0	0	0	0	NA
ENSG00000130766	4.25767	3.91076	3.7602	3.93842	3.23487	4.09545	4.74686	4.51334	4.14908	3.80541	4.30504	4.34645	2.33244	4.14985	4.2444	4.47494	3.97494	2.78848	3.60268	5.92573	3.05341	3.81506	3.80336	3.97702	3.75474	3.84218	4.79405	3.79959	4.38338	4.17327	0.336456
ENSG00000130772	3.04579	3.55549	3.09875	3.71821	2.34936	3.16729	4.02274	4.10577	3.21029	3.6031	3.63948	3.64039	2.09438	2.92562	3.44478	3.15789	3.23107	2.85044	3.09172	2.88958	2.27275	3.15758	3.30528	3.93518	4.24735	3.39881	3.76432	3.21509	3.3654	3.34945	0.231926
ENSG00000204138	3.79555	3.6129	4.00572	4.15954	2.83248	3.99371	2.84617	4.41978	4.86592	3.93505	4.54855	4.24184	2.62988	3.75893	3.34201	4.14884	4.31988	3.20268	4.75157	4.29067	2.78623	3.40714	4.24759	4.00836	4.19274	3.60407	3.94993	4.42875	4.65817	4.92461	0.208867
ENSG00000206779	0	0	0	0	0	0	0	0	0	0	0	0	0	0	0	0	0	0	0	0	0	0	0	0	0	0	0	0	0	0	NA
ENSG00000229820	0	0	0	0	0	0	0	0	0	0	0	0	0	0	0	0	0	0	0	0	0	0	0	0	0	0	0	0	0	0	NA
ENSG00000221216	0	0	0	0	0	0	0	0	0	0	0	0	0	0	0	0	0	0	0	0	0	0	0	0	0	0	0	0	0	0	NA
ENSG00000180198	3.97347	3.50769	3.10594	4.6014	1.98507	4.08567	4.46918	4.63218	4.38694	3.86974	4.29536	3.97979	1.92239	2.97522	3.68472	4.3103	4.58217	2.92725	3.75046	4.64125	3.13416	2.74588	3.96751	4.16127	4.44876	3.57115	5.92282	4.18486	4.22731	4.42641	0.356355
ENSG00000242125	1.493	0.967178	0.82849	1.9249	0	1.42766	2.83117	2.7194	2.33912	1.19137	2.20645	3.06432	0	0.424774	0.73718	2.82483	1.71389	0	1.73356	2.83271	0.872004	1.24237	1.67837	1.59251	2.42945	1.60464	0.565001	2.09237	1.4404	2.64624	0.500828
ENSG00000200087	2.33525	1.54042	1.84034	1.93868	0.115499	2.37367	3.08338	3.10969	3.27454	1.94774	2.92998	3.49823	0.550268	1.19986	1.30448	3.64881	2.28691	0	2.62505	3.41601	1.52075	1.64404	2.56393	2.33324	3.25532	2.18837	0.990403	2.80356	2.1903	3.58945	0.409828
ENSG00000238821	0	0	0	0	0	0	0	0	0	0	0	0	0	0	0	0	0	0	0	0	0	0	0	0	0	0	0	0	0	0	NA
ENSG00000231468	0	0	0	0	0	0	0	0	0	0	0	0	0	0	0	0	0	0	0	0	0	0	0	0	0	0	0	0	0	0	NA
ENSG00000180098	3.43204	2.79677	3.51448	3.69507	2.72373	3.51455	2.91898	3.45995	3.70067	3.29729	3.46501	3.70582	1.94109	2.64856	1.53181	3.59008	3.20084	1.92965	3.78968	3.86818	2.1256	2.97484	3.21409	3.25238	3.62977	2.94053	2.87582	3.32872	3.82095	3.50497	0.19303
ENSG00000197989	4.35004	2.72636	4.65271	4.46181	3.00733	4.71271	4.04113	4.22276	5.08433	4.30884	4.46192	4.48552	2.40798	3.66057	2.50732	5.25714	4.59796	3.00363	4.87352	5.41109	3.21333	4.08641	4.72761	4.64607	5.04456	3.8817	3.21113	4.55648	5.0302	4.98602	0.233967
ENSG00000221539	0	0	0	0	0	0	0	0	0	0	0	0	0	0	0	0	0	0	0	0	0	0	0	0	0	0	0	0	0	0	NA
ENSG00000120656	4.25025	3.78363	4.22714	4.16386	3.21812	4.19293	4.21556	4.51808	4.58299	3.9481	4.01932	4.26228	3.25315	3.41056	2.9657	4.222	3.72671	3.7442	4.5314	4.42263	2.94047	4.16594	3.88447	3.69263	4.15988	3.56122	5.04592	4.24236	4.46345	4.40748	0.212907
ENSG00000188060	1.92174	0	0.395014	0.809998	0	1.74151	1.26349	1.11958	1.94579	0.840663	0	0.961898	0	0.0607585	0	1.82373	1.81179	0	0.450777	0	0	0	0.324811	1.0949	2.43463	0	1.19542	0.288394	1.13	1.01973	0.713899
ENSG00000229388	0.170106	0	0.528031	0.228961	0	0	0	0	0.0818726	0	0	0.38141	0.249527	0	0	0	0	1.83579	1.38621	0.0481659	0	0.945992	0	0	0	0	0.721198	0	0.301724	0	0.905271
ENSG00000270103	0.391076	0	0	0	0	0.950589	0	0	0	0	0	0	0	0	0	0	0	0.86268	0.282789	0	0	0	0	0	0	0	0.252848	0	0	0	0.935089
ENSG00000162419	2.32103	1.69437	2.37328	2.41157	1.67671	2.44505	2.30141	2.6854	2.809	2.11976	2.19898	2.70215	0.756396	1.51464	0.913831	2.49518	1.97033	1.61013	2.6663	3.02933	0.926636	2.40844	2.30765	2.37842	2.90756	1.7558	2.99825	2.50081	2.92915	2.51682	0.279514
ENSG00000252777	0	0	0	0	0	0	0	0	0	0	0	0	0	0	0	0	0	0	0	0	0	0	0	0	0	0	0	0	0	0	NA
ENSG00000198492	5.32117	5.22291	5.03204	5.4554	4.09282	5.48765	4.71349	5.89812	5.43905	4.98886	5.15352	5.67485	3.81153	4.37232	4.24422	5.547	5.2698	4.71084	5.4127	5.37226	3.98073	4.78979	5.08585	5.0807	5.39609	4.82396	5.56741	5.33054	5.45712	5.35479	0.145318
ENSG00000116329	0	0	0	0	0	0	0	0	0	0	0	0	0	0	0	0	0	0	0	0	0	0	0	0	0	0	0	0	0	0	NA
ENSG00000226852	0	0	0	0	1.19323	0	0	0	0	0	0	0	0	0	0	0	0	0	0	0	0	0	0	0	0	0	0	0	0	0	1
ENSG00000233427	0	0	0	0	0	0	0	0	0	0	0	0	0	0	0	0	0	0	0	0	0	0	0	0	0	0	0	0	0	0	NA
ENSG00000199756	0	0	0	0	0	0	0	0	0	0	0	0	0	0	0	0	0	0	0	0	0	0	0	0	0	0	0	0	0	0	NA
ENSG00000159023	3.53874	3.55978	2.88959	4.28763	4.56594	3.63789	4.72958	3.81372	3.82574	3.64353	3.43243	3.18231	2.30914	3.15299	3.69817	4.15912	3.82068	3.2086	2.31233	4.16057	3.18075	3.53553	3.81799	4.64088	4.51601	3.77776	3.80934	4.0757	4.14369	3.77402	0.223737
ENSG00000225616	0	0	0	0	0	0	0	0	0	0	0	0	0	0	0	0	0	0	0	0	0	0	0	0	0	0	0	0	0	0	NA
ENSG00000206704	0	0	0	0	0	0	0	0	0	0	0	0	0	0	0	0	0	0	0	0	0	0	0	0	0	0	0	0	0	0	NA
ENSG00000253304	4.51997	2.15901	5.09529	5.17958	1.98396	4.23883	0	3.56279	6.41752	5.11558	4.09814	5.245	1.8761	3.15607	1.63898	4.11028	2.40719	0.574846	4.76169	6.01882	0	2.24621	5.44061	3.58724	2.89448	2.74745	4.80717	3.11251	7.08309	5.61844	0.500443
ENSG00000225750	0	0	0	0	0	0	0	0	0	0	0	0	0	0	0	0	0	0	0	0	0	0	0	0	0	0	0	0	0	0	NA
ENSG00000116350	6.92773	6.12579	6.8245	7.02307	5.72423	6.98134	6.3421	6.75182	7.29333	6.8406	6.71725	7.04814	5.30107	5.97865	5.84798	7.17407	6.43305	5.96892	7.04334	7.30531	5.25083	6.5856	6.96053	6.69206	6.97958	6.2799	6.5103	7.18126	7.42346	7.02563	0.112237
ENSG00000227637	0.50379	0	0	0.719116	0	0.765712	0	0	1.31872	0.172176	0.26411	0.307412	0	0	0	1.14618	0.882271	0	1.15174	1.84487	0	0.308595	1.06477	0.0564014	0.172763	0	0.531784	1.26091	1.73559	1.35018	0.743703
ENSG00000116353	3.7713	3.41988	3.35946	3.41366	3.46548	3.79288	2.13324	3.82932	3.77499	3.13973	3.23151	3.78106	2.99656	3.05958	2.66949	3.08936	3.41778	3.71769	3.97742	3.83482	2.07483	3.16184	3.3796	2.69092	2.88706	2.93079	3.87001	3.54249	3.99681	3.52243	0.172312
ENSG00000237934	0	0	0	0	0	0	0	0	0	0	0	0	0	0	0	0	0	0	0	0	0	0	0	0	0	0	2.70344	0	0	0	1
ENSG00000060656	3.72244	1.85891	4.1496	5.29307	3.63422	4.02786	0	4.16918	6.38356	3.10923	3.37591	4.93297	3.03257	2.94019	3.00755	4.6581	4.77447	3.96923	5.9038	5.08416	3.28404	4.62531	5.09516	2.21049	2.24084	3.26988	3.5555	3.8234	5.1831	5.00591	0.406141
ENSG00000221550	0	0	0	0	0	0	0	0	0	0	0	0	0	0	0	0	0	0	0	0	0	0	0	0	0	0	0	0	0	0	NA
ENSG00000230523	0	0	0	0	0	0	0	0	0	0	0	0	0	0	0	0	0	0	0	0	0	0	0	0	0	0	0	0	0	0	NA
ENSG00000266678	0	0	0	0	0	0	0	0	0	0	0	0	0	0	0	0	0	0	0	0	0	0	0	0	0	0	0	0	0	0	NA
ENSG00000225011	0	0	0	0	0	0	0	0	0	0	0	0	0	0	0	0	0	0	0	0	0	0	0	0	0	0	0	0	0	0	NA
ENSG00000221126	0	0	0	0	0	0	0	0	0	0	0	0	0	0	0	0	0	0	0	0	0	0	0	0	0	0	0	0	0	0	NA
ENSG00000228176	0	0	0	0	0	0	0	0	0	0	0	0	0	0	0	0	0	0	0	0	0	0	0	0	0	0	0	0	0	0	NA
ENSG00000222787	0	0	0	0	0	0	0	0	0	0	0	0	0	0	0	0	0	0	0	0	0	0	0	0	0	0	0	0	0	0	NA
ENSG00000270927	0	0	0	0	0	0	0	0	0	0	0	0	0	0	0	0	0	0	0	0	0	0	0	0	0	0	0	0	0	0	NA
ENSG00000233399	0	0	0	0	0	0	0	0	0	0	0	0	0	0	0	0	0	0	0	0	0	0	0	0	0	0	0	0	0	0	NA
ENSG00000233372	0	0	0	0	0	0	0	0	0	0	0	0	0	0	0	0	0	0	0	0	0	0	0	0	0	0	0	0	0	0	NA
ENSG00000231251	0	0	0	0	0	0	0	0	0	0	0	0	0	0	0	0	0	0	0	0	0	0	0	0	0	0	0	0	0	0	NA
ENSG00000236335	0	0	0	0	0	0	0	0	0	0	0	0	0	0	0	0	0	0	0	0	0	0	0	0	0	0	1.01635	0	0	0	1
ENSG00000231949	0	0	0	0	0	0	0	0	0	0	0	0	0	0	0	0	0	0	0	0	0	0	0	0	0	0	0	0	0	0	NA
ENSG00000162510	0	0	0	0	0	0	0	0	0.301894	0	0	0	0	0	0	0	0	0	0	0.19843	0	0	0	0	0	0	0	0	0.0256163	0	0.974409
ENSG00000186056	0.866164	0	0.747294	1.52748	0	1.61372	1.159	1.32483	2.62427	0.432776	0.344538	2.13966	0	0	0	0.997317	1.14763	0	1.60762	2.52251	0.125368	1.12173	1.79162	1.62557	2.08821	0.452264	0.351349	1.70384	2.37619	1.9433	0.605671
ENSG00000162511	7.03927	5.91174	6.54905	5.88901	4.7196	6.32014	10.4184	4.14069	5.26071	5.45774	5.01187	6.46266	4.00065	5.22206	4.27147	8.31963	5.68086	2.13877	5.99721	4.46667	3.57206	5.08237	5.46158	7.5279	9.35793	5.05469	2.98378	5.90848	5.03433	5.10485	0.477225
ENSG00000264773	0	0	0	0	0	0	0	0	0	0	0	0	0	0	0	0	0	0	0	0	0	0	0	0	0	0	0	0	0	0	NA
ENSG00000229607	0	0	0	0	0	0	0	0	0	0	0	0	0	0	0	0	0	0	0	0	0	0	0	0	0	0	0	0	0	0	NA
ENSG00000223382	0	2.19379	0	0	0	0	0	0	0	0.852811	0	0.390793	0	0	0	0	0	0	0	0	0	0	0.069951	0	0	0	1.29003	0	1.03929	0	0.94274
ENSG00000222784	0	0	0	0	0	0	0	0	0	0	0	0	0	0	0	0	0	0	0	0	0	0	0	0	0	0	0	0	0	0	NA
ENSG00000235143	0	0	0	0	0	0	0	0	0	0	0	0	0	0	0	0	0	0	0	0	0	0	0	0	0	0	0	0	0	0	NA
ENSG00000162512	4.85381	7.10925	5.40188	5.75843	6.16663	5.10548	0.683908	4.35861	5.87194	6.17315	5.32939	6.25744	3.90266	3.73952	2.65317	5.37128	4.11718	1.37973	6.69304	4.22685	2.19347	4.5489	5.79587	4.77581	6.73353	4.89915	2.54779	4.47775	6.48968	4.85691	0.343434
ENSG00000134644	5.27866	5.04838	5.49634	5.47991	4.68883	5.54653	3.8949	5.49035	5.66469	5.01863	5.01831	5.50026	3.81841	4.33957	3.71666	5.27344	5.17676	4.9512	5.70805	5.78519	3.63844	4.99737	5.23134	4.86335	4.88874	4.54361	4.59126	5.63929	5.79158	5.49244	0.137982
ENSG00000200154	0	0	0	0	0	0	0	0	0	0	0	0	0	0	0	0	0	0	0	0	0	0	0	0	0	0	0	0	0	0	NA
ENSG00000202107	0	0	0	0	0	0	0	0	0	0	0	0	0	0	0	0	0	0	0	0	0	0	0	0	0	0	0	0	0	0	NA
ENSG00000200181	0	0	0	0	0	0	0	0	0	0	0	0	0	0	0	0	0	0	0	0	0	0	0	0	0	0	0	0	0	0	NA
ENSG00000237329	0	0	0	0	0	0	0	0	0	0	0	0	0	0	0	0	0	0	0	0	0	0	0	0	0	0	0	0	0	0	NA
ENSG00000232768	0	0	0	0	0	0	0	0	0	0	0	0	0	0	0	0	0	0	0	0	0	0	0	0	0	0	0	0	0	0	NA
ENSG00000215900	0	0	0	0	0	0	0	0	0	0	0	0	0	0	0	0	0	0	0	0	0	0	0	0	0	0	0	0	0	0	NA
ENSG00000225142	0	0	0	0	0	0	0	0	0	0	0	0	0	0	0	0	0	0	0	0	0	0	0	0	0	0	0	0	0	0	NA
ENSG00000084628	0	4.20012	0	0	4.10751	0	0	1.0348	0	0	0	0	0	0	0	0	0	3.20469	0	0	0	2.04342	0.288665	0	0	0	0	0	0	0	0.912325
ENSG00000060688	3.87697	3.66162	3.79455	4.00622	3.16105	4.07289	3.85753	4.21102	4.3617	3.69453	3.73066	4.36457	2.4858	3.06737	2.40317	3.95477	3.51136	2.90782	4.37694	4.26084	2.23244	4.05801	4.0333	3.79784	4.34474	3.36686	4.38306	4.10093	4.46146	4.07276	0.164095
ENSG00000229447	1.31794	0.397453	1.44445	1.10269	0.881626	1.74641	0.250795	1.33847	2.11146	0.878914	0.757575	1.57925	0.0360172	0.0862584	0	1.77947	0.833791	0	2.59455	2.28487	0	1.37663	1.58988	1.1559	1.31671	0.418608	0.958307	1.70428	2.30834	2.01788	0.579039
ENSG00000121766	4.95366	4.93704	5.23419	5.09788	5.92423	5.09633	4.27906	5.23154	5.18684	4.97983	5.03712	5.21057	4.6993	4.62993	3.28738	4.97652	4.67819	4.32553	5.71963	5.10074	3.3735	5.3935	5.1564	4.61893	4.9582	4.5204	6.60225	5.262	5.32457	5.0974	0.256834
ENSG00000229044	0	0	0	0	0	0	0	0	0	0	0	0	0	0	0	0	0	0	0	0	0	0	0	0	0	0	0	0	0	0	NA
ENSG00000121769	4.81876	5.98758	6.95527	3.46945	6.05026	4.47101	3.23803	3.64443	5.92508	3.96496	4.78412	5.85947	11.0831	6.73083	1.6194	4.96871	5.7043	9.94608	3.86829	4.81472	0.220623	3.6603	6.15503	3.18234	5.18275	5.56761	4.88258	3.52244	6.44966	5.58231	0.560605
ENSG00000168528	2.54056	4.28905	1.8961	7.18802	0	5.4129	3.41991	6.02222	4.98742	5.64349	5.42435	4.42297	0.454418	6.29129	6.79238	4.75886	7.18629	5.22923	1.54332	0.100107	4.1149	3.51162	6.15564	6.08543	1.95834	5.77712	2.89249	5.13745	2.02371	5.35313	0.42709
ENSG00000268950	0	0	0	1.62462	0	0	0	0	0	0	0	0	0	0	0	0	0.404835	0	0	0	0	0	0	0	0	0	0	0	0	0	0.991407
ENSG00000215899	0	0	0	0	0	0	0	0	0	0	0	0	0	0	0	0	0	0	0	0	0	0	0	0	0	0	0	0	0	0	NA
ENSG00000206981	0	0	0	0	0	0	0	0	0	0	0	0	0	0	0	0	0	0	0	0	0	0	0	0	0	0	0	0	0	0	NA
ENSG00000228682	0	0	0	0	0	0	0.655524	0	0.217717	0	0	0	0	0	0	0	0	0	0	0	0	0	0	0	0	0	0	0	0	0	0.988547
ENSG00000223907	0	0	0	0	0	0	1.23785	0	1.1221	0	0	0	0	0	0	0	0	0	0	0	0	0	0	0	0	0	0	0	0	0	0.968742
ENSG00000229167	0	0	0.909468	0.271045	0	0.407657	0	0	0.074904	1.69911	0.0325842	0	0	0.128423	0	0	1.54214	0	0	0	0	0	0.599571	0.759209	1.95813	0	0	2.18344	0.763756	0	0.855559
ENSG00000142910	7.21895	4.82358	8.06633	6.58621	2.70448	7.11893	0	4.52742	6.77371	6.18876	5.96392	6.58354	5.84549	6.84618	3.26678	6.56711	5.84961	4.20827	6.26783	5.53031	3.64321	4.81914	6.37719	5.57134	7.0933	5.67554	3.17351	7.1355	7.09711	6.42334	0.316528
ENSG00000121764	0	0	0	0	0	0	0	0	0	0	0	0	0	0	0	0	0	0	0	0	0	0.124891	0	0	0	0	0	0.730217	0	0	0.994102
ENSG00000162517	5.94132	5.8515	6.6427	6.04662	5.49577	6.02902	5.60161	6.3119	6.3273	5.80032	5.99116	6.20334	4.66896	5.46934	4.95144	6.32526	5.31258	4.42512	6.45701	6.01938	4.17962	5.97682	6.17931	5.47759	5.98566	5.46143	5.93025	7.26557	6.46751	6.00651	0.204865
ENSG00000235790	1.57181	0	2.40638	2.74666	1.71757	1.92873	0	2.13392	3.42613	2.31286	1.44531	1.59816	0	0	0	1.76264	0.0790056	0	3.32676	3.92997	0	1.1572	3.36259	1.47523	0	1.17551	2.9449	2.38196	2.9135	3.12822	0.6052
ENSG00000264078	0	0	0	0	0	0	0	0	0	0	0	0	0	0	0	0	0	0	0	0	0	0	0	0	0	0	0.980961	0	0	0	1
ENSG00000084636	5.47544	3.75364	6.86517	7.13532	5.00195	6.02149	0	6.39796	7.80333	6.38039	5.5885	5.96783	3.93481	4.12502	1.23101	5.58862	4.43415	2.29904	7.01048	8.21162	2.26388	5.5459	7.48083	5.63894	3.59123	5.53922	6.10836	6.52466	7.3675	7.26403	0.360289
ENSG00000121753	1.53147	1.81539	1.13088	1.73106	5.87821	1.45217	0	0.959965	2.17506	1.3273	1.02415	1.81786	1.7965	0.533796	0	0.734761	0	0	2.10633	1.59672	0	4.12541	2.23994	1.88751	0.791598	0.770553	2.98373	2.68327	2.41393	1.39224	0.759359
ENSG00000266580	0	0	0	0	0	0	0	0	0	0	0	0	0	0	0	0	0	0	0	0	0	0	0	0	0	0	0	0	0	0	NA
ENSG00000254545	0	0	0	0	0	0	0	0	0	0	0	0	0	0	0	0	0	0	0	0	0	0	0	0	0	0	0	0	0	0	NA
ENSG00000134668	1.77671	0	1.2401	3.57664	0	1.30874	0.7509	2.98291	1.98984	0	0	0	0	0	0	3.65842	0	0	1.26079	0	0	1.42617	1.64333	0	1.30351	0	4.08786	0	1.91195	0.447549	0.786774
ENSG00000203620	0	0	0	0	0	0	0	0	0	0	0	0	0	0	0	0	0	0	0	0	0	0	0	0	0	0	0	0	0	0	NA
ENSG00000269967	0.747592	0	0	0.330753	0	0.479026	0	0	0.280535	0	0	0	0	0	0	1.18219	0	0	0.382164	0.934449	0	0	0.313273	0	0.224827	0	0	0.210624	0.483207	0.956258	0.84416
ENSG00000184007	6.94059	5.76719	6.55834	7.13639	6.65173	6.79106	6.33683	6.19397	6.6267	6.32426	6.07172	6.44446	5.89181	5.50175	4.90597	6.70203	6.02439	7.03521	6.54081	6.53967	4.82416	6.10315	6.38101	6.13294	6.41742	6.1612	6.14004	6.693	6.47015	6.16503	0.123788
ENSG00000212673	0.966613	0	0	1.38162	0	0.875595	0	0	1.02416	0	0	0.330345	0	0	0	1.12695	0.27782	0	0.894498	1.41195	0	0.329299	0.637845	0.120492	0.264908	0	0	0.87701	0.577238	0.989587	0.73932
ENSG00000228634	0	0	0	0	0	0	0	0	0	0	0	0	0	0	0	0	0	0	0	0	0	0	0	0	0	0	0	0	0	0	NA
ENSG00000121774	6.35953	5.72188	6.53127	6.61428	5.64705	6.45538	6.10262	6.40733	7.05084	6.13642	6.12086	6.74129	4.88424	5.43768	4.41528	6.3215	5.95119	4.9708	6.53679	7.22695	4.73166	6.12163	6.09103	5.98444	6.05599	5.71473	6.16951	6.3928	7.05448	6.52425	0.163825
ENSG00000203325	0	0	0	0	0	0	0	0	0	0	0	0	0	0	0	0	0	0	0	0	0	0	0	0	0	0	0	0	0	0	NA
ENSG00000121775	3.50266	2.85425	3.64367	3.67927	2.71457	3.53001	2.97516	3.56542	4.22124	3.21481	3.16805	3.85869	1.86642	2.74831	2.43933	3.59372	3.00106	1.99116	3.72923	4.0164	1.80985	3.65281	3.66858	3.2276	3.65618	2.86768	4.02799	3.93443	4.38017	3.91925	0.251502
ENSG00000266203	0	0	0	0	0	0	0	0	0	0	0	0	0	0	0	0	0	0	0	0	0	0	0	0	0	0	0	0	0	0	NA
ENSG00000025800	4.76723	4.59654	5.22377	5.11023	4.24814	4.77077	4.17099	5.14114	5.17803	4.83371	5.06605	5.08546	4.13397	3.98498	3.62178	5.08735	4.56629	5.06152	5.03846	4.96159	3.37242	4.90306	4.93807	4.46825	4.57848	4.49418	5.29548	5.04774	5.41848	5.07905	0.129258
ENSG00000084652	5.40431	5.76607	5.89387	5.69804	4.5531	5.38788	4.76584	5.89306	6.00049	5.73059	5.78777	6.25423	4.053	4.95321	5.11474	5.70569	5.31031	4.19837	6.03224	6.04025	4.47419	6.0344	6.03672	5.40552	5.78781	5.28599	6.20677	6.0432	6.48785	5.73526	0.151981
ENSG00000160050	1.88464	3.30833	2.14108	2.17025	3.04392	2.11944	3.94323	1.96485	2.81444	2.44056	1.94516	3.52575	2.2613	2.27789	0.261308	2.29458	1.84277	4.8009	2.54322	2.94818	0.886369	4.27431	2.80316	2.18249	2.54901	1.72536	4.75911	3.53654	3.01372	2.4331	0.469251
ENSG00000224066	0	0.443284	0.198699	0.621107	0.259571	0.727726	0	0.0654125	1.24219	0.345287	0.0943236	2.66375	0	0.532513	0	0.604236	0.386167	0	1.19905	1.56943	0	2.43077	1.87435	0.495478	0.734936	0.0400218	2.64524	2.75991	1.65554	0.831745	0.729366
ENSG00000160051	1.68074	2.2967	1.49872	2.31248	2.5361	2.35162	1.46008	2.44308	2.61758	2.03769	1.8481	3.72192	0.396184	2.05849	0.254011	2.26944	2.08495	1.05515	2.95241	3.22683	1.41799	3.96076	2.84554	1.96306	2.28123	1.86797	4.98526	3.92957	3.123	2.38505	0.551253
ENSG00000222046	0	0	0	0	0	0	0	0	1.63129	0	0	5.17458	0	0	0	2.64081	0	0	0.438072	0.776515	0	1.10452	0.742024	0	0	0	2.58952	1.79665	0.772818	0	0.916753
ENSG00000160055	3.40517	3.62724	3.70483	3.76244	2.6983	3.85261	3.3126	3.13434	4.20106	3.58701	3.50667	5.17419	2.36481	3.81175	2.34969	4.18856	3.56115	1.0269	4.33149	4.55049	2.49223	5.2551	4.65182	3.4385	4.10454	3.26488	5.06204	5.44367	4.62944	4.06128	0.321507
ENSG00000084623	7.62627	7.65411	7.6741	7.64903	6.55552	7.69855	7.27466	7.95528	7.91294	7.41064	7.55386	7.72656	6.46596	6.87271	6.50724	7.69171	7.29704	7.51668	7.62531	8.04594	6.52121	7.26044	7.6099	7.07236	7.24099	7.27092	6.87862	7.72519	7.88024	7.68354	0.0836602
ENSG00000220785	4.69719	4.84068	4.65011	4.10287	2.5552	4.91218	0	3.0269	5.25123	4.075	4.07099	4.97878	3.43443	4.6676	2.00032	5.29141	4.03344	1.87037	4.70312	6.51999	3.65049	6.09152	5.09133	4.37667	3.97314	3.73155	3.89809	5.39055	5.71709	5.0596	0.364597
ENSG00000183615	4.46286	4.6413	3.389	3.64096	1.3356	4.10768	0.155125	2.12821	4.54994	3.46851	3.37868	3.90264	2.4463	5.33149	2.97408	5.37684	2.96364	1.26784	3.78401	3.08895	2.60324	4.95215	4.99386	3.65384	1.79501	3.30499	1.37711	5.4434	5.29541	4.11213	0.376142
ENSG00000182866	2.04094	0	1.06039	2.25297	0	1.45372	6.42496	0.263798	1.55571	1.92769	1.06453	1.9817	0	2.05692	0.925631	4.07852	1.44948	0	0.850012	0.143375	0	0.418629	2.287	5.08476	5.91129	2.13749	0.26993	2.86118	1.28046	2.28612	0.755038
ENSG00000252450	0	0	0	0	0	0	0	0	0	0	0	0	0	0	0	0	0	0	0	0	0	0	0	0	0	0	0	0	0	0	NA
ENSG00000116478	5.72503	6.09907	6.19121	6.79989	4.16553	6.13468	6.57647	6.13774	6.91962	6.74304	6.5361	6.70629	4.50223	5.83468	5.12415	6.46104	6.3577	3.57114	6.21068	6.97684	4.97642	6.57571	6.73766	6.9197	7.04059	6.35909	6.40769	7.06101	6.84388	6.87799	0.128229
ENSG00000175130	6.20122	6.28231	4.93101	6.18007	8.29093	6.82225	7.06887	5.31817	7.34589	6.06515	4.49744	7.51683	5.16778	5.40033	4.75678	6.36468	6.75303	2.84142	7.49676	9.55278	4.14783	5.58101	6.90536	6.52671	6.88597	6.52023	8.45176	7.88453	7.12121	5.90979	0.345793
ENSG00000233775	0	0	0	0	0	0	0	0	0	0	0	0	0	0	0	0	0	0	0	1.217	0	0	0	0	0	0	0.614514	0.0125669	0	0	0.982232
ENSG00000162526	3.09313	3.04993	3.01045	3.16228	2.72324	3.21985	2.67298	3.1815	3.75923	3.12727	2.91467	3.92383	1.25465	2.82969	2.5237	3.61777	3.21625	1.62283	3.73986	4.09707	1.84367	3.25294	3.65609	3.6856	4.20706	2.81165	5.83114	3.9188	4.12793	3.51599	0.457373
ENSG00000225828	3.44345	3.59986	3.26299	3.65729	3.41995	3.59209	2.96955	3.50129	4.39009	3.442	3.29887	4.58187	1.56894	3.68919	3.22826	3.88392	3.46438	1.50256	4.07643	4.863	1.94841	3.87319	4.41089	3.99764	4.72474	3.09687	8.05552	4.48832	4.46316	3.93908	0.553195
ENSG00000160058	5.5101	5.91178	5.59432	5.63657	5.43652	5.64965	4.63344	5.62727	5.84542	5.36027	5.32075	5.65748	4.24031	4.98073	5.13555	5.62131	5.60797	4.53336	5.91211	6.36205	4.78233	5.93279	5.84031	5.35393	5.55507	5.24064	6.36112	5.93309	6.04135	5.7155	0.138366
ENSG00000224333	0	0	0	0	0	0	0	0	0	0	0	0	0	0	0	0	0	0	0	0	0	0	0	0	0	0	0	0	0	0	NA
ENSG00000270850	0	0	0	0	0	0	0	0	0	0	0	0	0	0	0	0	0	0	0	0	0	0	0	0	0	0	0	0	0	0	NA
ENSG00000229259	0	0	0	0	0	0	0	0	0	0	0	0	0	0	0	0	0	0	0	0	0	0	0	0	0	0	0	0	0	0	NA
ENSG00000263529	0	0	0	0	0	0	0	0	0	0	0	0	0	0	0	0	0	0	0	0	0	0	0	0	0	0	0	0	0	0	NA
ENSG00000273274	0	0	0	0	0	0	0	0	0	0	0	0	0	0	0	0	0	0	0	0	0	0.470584	0	0	0	0	0	0	0	0	1
ENSG00000160062	2.45107	0.986382	2.37313	2.4939	1.0099	2.30766	0	1.71289	2.91345	1.8592	1.92179	2.75894	0.420665	0.773769	0.000777197	2.39998	1.79179	0.701346	2.85856	2.52535	0.601379	1.59135	2.10414	1.21373	0.465486	1.49952	1.73185	2.59261	3.25775	2.31901	0.487909
ENSG00000176261	3.28156	3.24578	3.77681	3.74651	3.10482	3.4045	3.28715	3.28596	3.57982	3.54265	3.56682	3.85314	2.46513	3.0225	2.6059	3.68274	3.24888	2.98264	3.59596	3.26709	2.42633	4.10374	3.76336	3.63745	3.86539	3.40168	3.94431	3.81596	3.63977	3.46538	0.172278
ENSG00000200591	0	0	0	0	0	0	0	0	0	0	0	0	0	0	0	0	0	0	0	0	0	0	0	0	0	0	0	0	0	0	NA
ENSG00000162521	4.70118	4.83675	4.92095	5.33985	4.5481	4.95741	4.6847	5.00928	5.63731	4.80857	4.81501	5.56747	3.5182	4.06652	3.43959	5.04344	4.92502	3.95868	5.2875	5.70436	3.94738	5.1413	4.99338	4.94254	5.12788	4.70985	5.94154	5.23623	5.60029	5.05025	0.184474
ENSG00000162520	2.69599	2.15325	4.4013	3.40235	0.821328	2.34034	0	2.57047	2.7485	3.5652	4.55637	3.95553	2.19509	0	0	2.70912	2.31734	5.60396	2.72195	1.67482	0	0.180942	3.03292	2.99447	0.624198	3.51254	2.12994	1.621	3.81893	2.26561	0.599978
ENSG00000224409	0	0.300626	0	0	0	0	0	0	0	0	0	0	0	0	0	0	0	0	0	0	0	0	0	0	0	0	0	0	0	0	1
ENSG00000162522	3.6035	6.91793	3.12024	6.06695	3.48124	5.43402	0	6.43263	5.05624	5.29015	5.87691	5.77128	1.79283	5.55987	3.1955	5.30922	6.69063	1.37152	4.06419	5.56227	5.6886	4.19915	6.30637	5.93821	1.45374	6.33516	3.6092	6.49989	4.55165	5.65185	0.332504
ENSG00000134684	4.52545	5.23201	4.38441	4.38631	4.59348	4.50518	4.70328	5.27475	4.39269	4.18038	4.48337	4.59872	3.20958	3.46671	4.0849	5.29846	4.36431	4.08181	4.52907	4.38813	3.74351	4.53561	4.34963	3.98545	4.50716	4.64842	4.98121	4.72667	4.42653	4.45265	0.16865
ENSG00000116497	3.25692	3.15264	3.32837	3.52496	3.14282	3.41905	3.1959	3.20842	3.95301	3.22837	3.02995	3.97373	1.51992	2.4339	1.79151	3.43829	3.04006	1.63837	3.98542	4.27215	1.54117	3.6008	3.49515	3.42892	4.03132	2.67062	5.06288	3.84552	4.04527	3.54765	0.368357
ENSG00000160097	1.15702	4.3196	2.50116	0.411742	4.98899	1.34848	0	0	1.46622	1.48106	3.24019	2.74207	4.80969	0.240194	3.20999	0.826048	3.83697	6.30559	1.35121	3.54375	0	3.7658	2.4446	1.1782	0	3.3785	3.20654	2.02014	2.73802	1.51885	0.66245
ENSG00000121905	0	0	0	0	8.13194	0	0	0	0.404219	0	0	0	0	0	0	0	0	0	0	0.631456	0	1.57032	0.127253	0	0	0	3.39414	0	0.942867	0.0317524	0.969885
ENSG00000121900	4.22769	3.90435	4.44326	6.34863	4.98641	4.9219	0	6.53636	5.95255	7.36769	6.50755	5.14329	3.10512	5.22629	2.92569	5.18438	5.80141	1.83566	4.05542	4.82274	3.93104	4.94609	6.24393	7.01896	3.99513	6.38246	4.58184	6.18605	5.81611	6.56037	0.337318
ENSG00000221423	0	0	0	0	0	0	0	0	0	0	0	0	0	0	0	0	0	0	0	0	0	0	0	0	0	0	0	0	0	0	NA
ENSG00000116514	4.58263	4.24693	5.15841	4.95534	3.89268	4.39827	5.48284	4.9556	5.0582	4.9001	5.04175	4.79323	2.96715	4.24054	2.92701	5.2674	4.71975	3.7231	4.79786	4.42337	2.70167	4.02148	4.50972	4.91086	4.64969	3.98515	7.52769	4.43813	5.1427	5.34113	0.403432
ENSG00000267885	0	0	0	0	0	0	0	0	0	0	0	0	0	0	0	0	0	0	0	0	0	0	0	0	0	0	0	0	0	0	NA
ENSG00000217644	0	0	0	0	0	0	0	0	0	0	0	0	0	0	0	0	0	0	0	0	0	0	0	0	0	0	0	0	0	0	NA
ENSG00000239670	0	0	0	0	0	0	0	0	0	0	0	0	0	0	0	0	0	0	0	0	0	0	0	0	0	0	1.24787	0	0	0	1
ENSG00000004455	5.5705	5.27915	5.28004	5.35611	4.2693	5.70138	5.64696	5.65822	5.73353	5.40036	5.35565	5.6384	4.46424	5.75065	5.31629	5.57217	5.39551	4.97771	5.84363	5.56113	4.10934	5.1886	5.46472	5.61129	5.38532	5.12058	5.21371	6.13966	5.70774	5.60084	0.128487
ENSG00000236065	0	0	0	0	0	0	0	0	0	0	0	0	0	0	0	0	0	0	0	0	0	0	0	0	0	0	1.59892	0	0	0	1
ENSG00000142920	0.985716	2.02868	1.04346	1.00753	3.4442	1.79407	0	1.25443	2.52212	1.99388	0.704956	2.08887	0.893628	1.28807	0	1.41337	1.42161	0	2.43994	3.0071	0	2.79939	2.10133	1.18406	1.15763	0.278028	5.31396	2.38901	2.67363	2.05811	0.714656
ENSG00000116525	2.42286	3.26744	3.06322	3.60326	3.31085	2.8558	2.25798	4.07194	2.96117	2.42575	2.73255	2.84611	1.14071	2.24506	0.475113	2.75953	3.09063	2.09235	3.59344	3.0448	1.18944	3.67791	3.41369	2.85449	3.28268	2.62315	2.54608	3.17469	2.90481	3.12179	0.331189
ENSG00000160094	4.49994	3.95034	5.72601	5.27937	4.16728	4.74608	2.96413	4.58242	5.20594	4.44681	4.44516	5.12769	3.56794	4.03407	2.24859	4.54122	4.58939	3.55261	5.21834	5.06297	3.09163	4.84718	5.05078	4.03577	4.58722	4.025	4.06197	4.97906	5.32946	4.75982	0.235201
ENSG00000270115	0	0	0.589534	0	0	0	0	0	0	0	0	0	0	0	0	0	0.0925841	0	0	0.0940818	0	0.335091	0.52359	0	0	0	0.575081	0.286563	0.0756408	0	0.884033
ENSG00000184389	0	0	0	0	0	0	0	0	0	0	0	0	0	0	0	0	0	0	0	0	0	0	0	0	0	0	0.0916087	0	0	0	1
ENSG00000225313	3.14292	2.88619	3.57566	2.51638	1.81881	3.10736	5.11083	2.51624	2.75956	2.6928	2.72805	3.15369	1.78461	2.75964	2.51844	3.6307	2.524	1.5551	3.97497	2.77175	1.4331	3.35333	3.20702	2.82152	4.63079	2.71397	2.43199	3.36201	2.92559	2.3992	0.448801
ENSG00000134686	6.72106	5.89481	7.38605	6.6828	5.27289	6.72695	7.81283	6.19619	6.62386	6.35596	6.37636	6.69587	5.49691	6.22015	5.66806	7.23005	5.98098	6.83744	7.48249	6.32911	4.46156	6.28988	6.43493	5.77949	6.919	6.16206	6.40237	6.6221	6.66144	6.09812	0.187857
ENSG00000266239	0.0467812	0	0.781188	0	0	0.277509	1.40044	0	0	0	0	0	0	0	0	0.923689	0	0	0.808244	0	0	0	0	0	0.277505	0	0	0.0362603	0	0	0.922409
ENSG00000222112	2.319	1.11394	2.57856	1.80195	0	2.35131	3.47402	1.59625	1.70519	1.54361	1.58229	1.79208	1.25699	1.24008	0.643515	3.01748	1.77576	1.67039	3.51265	1.91366	0.174193	1.73108	1.75618	1.11875	2.00004	1.52061	0.461821	2.23062	2.02223	1.56809	0.529193
ENSG00000233246	0	0	0	0	0	0	0	0	0	0	0	0	0	0	0	0	0	0	0	0	0	0	0	0	0	0	5.4142	0	0	0	1
ENSG00000221225	0	0	0	0	0	0	0	0	0	0	0	0	0	0	0	0	0	0	0	0	0	0	0	0	0	0	0	0	0	0	NA
ENSG00000234512	0	0	0	0	0	0	0	0	0	0	0	0	0	0	0	0	0	0	0	0	0	0	0	0	0	0	0	0	0	0	NA
ENSG00000121903	0.457131	0.164678	0.704193	0.996783	0	0.56199	0	0.566716	0.597551	0.531095	0.547405	0.805587	0	0	0	0.212595	0.387986	0	1.09672	1.29871	0	0.698677	0.613741	0.384441	0.0699185	0.218139	1.6886	0.876317	1.09535	0.390382	0.72889
ENSG00000235907	0	0	0	0	0	0	0	0	0	0	0	0	0	0	0	0	0	0	0	0	0	0	0	0	0	0	0	0	0	0	NA
ENSG00000121904	0	0	0	0	1.24495	0	0	0	0	0	0	0	0	0	0	0	0	0	0.182601	0	0	0	0	0	0	0	0	0	0	0	0.994942
ENSG00000227000	0	0	0	0	0	0	0	0	0	0	0	0	0	0	0	0	0	0	0	0	0	0	0	0	0	0	0	0	0	0	NA
ENSG00000176256	0	0	0	0	0	0	0	0	0	0	0	0	0	0	0	0	0	0	0	0	0	0	0	0	0	0	8.86065	0	0	0	1
ENSG00000231163	0	0	0	0	0	0	0	0	0	0	0	0	0	0	0	0	0	0	0	0	0	0	0	0	0	0	5.86256	0	0	0	1
ENSG00000201148	0	0	0	0	0	0	0	0	0	0	0	0	0	0	0	0	0	0	0	0	0	0	0	0	0	0	0	0	0	0	NA
ENSG00000142698	0	0	0	0	0	0	0	0	0	0	0	0	0	0	0	0	0	0	0	0	0	0	0	0	0	0	5.42668	0	0	0	1
ENSG00000221053	0	0	0	0	0	0	0	0	0	0	0	0	0	0	0	0	0	0	0	0	0	0	0	0	0	0	0	0	0	0	NA
ENSG00000270241	0	0	0	0	0	0	0	0	0	0	0	0	0	0	0	0	0	0	0	0	0	0	0	0	0	0	0	0	0	0	NA
ENSG00000207941	0	0	0	0	0	0	0	0	0	0	0	0	0	0	0	0	0	0	0	0	0	0	0	0	0	0	0	0	0	0	NA
ENSG00000163866	3.511	3.64611	3.95198	3.0828	2.74064	3.38343	2.75478	3.22156	3.0632	3.14449	3.33967	3.2682	2.64642	2.91556	3.32566	3.53017	2.82821	2.70066	3.52705	2.70652	1.73432	3.18342	2.82778	3.13126	3.35475	2.83942	3.73117	3.31636	3.20762	3.06312	0.217106
ENSG00000189280	0	0	0	3.58155	0.0249834	0.505747	0	6.69009	4.1393	0	5.80148	0	0	0	0	0	4.47996	0	0	0	0	0.687056	3.31171	0	0	0	2.52003	0	0	5.8881	0.840526
ENSG00000189433	0	0	0	1.77618	0	0	0	5.0511	0	0	0.308251	0	0	0	0	0	0	0	0	0	0	0	0.62257	0	0	0	0	0	0	1.22809	0.973136
ENSG00000216162	0	0	0	0	0	0	0	0	0	0	0	0	0	0	0	0	0	0	0	0	0	0	0	0	0	0	0	0	0	0	NA
ENSG00000188910	0	0	0	3.18787	0	0	0	7.06992	3.47744	1.16395	5.19198	0.57563	0	0	0	0.214662	3.66725	0	0.321883	0	0	0	2.80941	1.10979	0	1.06106	0.733992	0	0	5.24027	0.85975
ENSG00000255811	0	0	0	0	0	0	0	0	0	0	0	0	0	0	0	0	0	0	0	0	0	0	0	0	0	0	0	0	0	0	NA
ENSG00000187513	6.95227	4.68373	7.00984	5.16843	2.74564	6.61545	0	3.78658	5.81183	4.38255	4.65634	6.42014	5.25906	4.73764	3.60968	6.17956	3.90737	4.60404	6.54812	5.07488	2.25173	3.5857	5.04221	4.38063	4.04935	4.06665	3.67584	6.30808	6.13747	5.3357	0.331104
ENSG00000230163	2.33106	2.52978	2.55835	2.25184	0.957814	2.28466	1.26766	2.16937	2.25616	2.34388	2.35968	2.73404	0.774778	1.82751	1.89775	2.74958	2.3349	0.382747	2.7923	2.54501	1.1427	2.80625	2.24057	2.66242	2.86149	1.94564	2.09482	2.82221	2.62176	2.17537	0.25454
ENSG00000116544	0	0	0	0	5.30176	0	0	0	0	0	0	0	0	0	0	0	0	0	0	0	0	3.25184	0	0.026691	1.94177	0	4.15518	0.124185	0	0	0.938214
ENSG00000252728	0	0	0	0	0	0	0	0	0	0	0	0	0	0	0	0	0	0	0	0	0	0	0	0	0	0	0	0	0	0	NA
ENSG00000241014	2.51616	2.05093	2.66501	2.76511	1.52359	2.68844	1.65096	2.09666	2.9301	2.03286	1.94751	3.45237	0.302736	1.957	0.728139	3.05777	1.78928	0	3.39362	3.0075	0.993585	2.67561	2.8741	2.80635	3.21383	1.53916	2.93936	3.00506	3.38334	2.73241	0.348112
ENSG00000243749	6.14566	5.59686	6.10185	5.95102	3.39387	6.08197	4.94701	5.23904	6.30101	5.36826	5.17096	6.26153	4.26844	5.32499	4.22538	6.36069	5.23559	2.7118	6.52735	5.98258	4.30785	5.36852	5.82906	5.36437	5.78659	4.90555	5.66979	6.421	6.43258	6.0654	0.171553
ENSG00000163867	2.9246	2.92584	3.12132	3.13178	2.44922	2.97865	2.38864	3.03	3.30434	2.9412	2.85867	3.28629	1.7985	2.46821	1.66804	3.23742	2.73759	1.2773	3.50108	3.64398	1.83516	3.55717	3.18201	3.2377	3.72842	2.63114	3.26616	3.46455	3.49454	3.20804	0.227285
ENSG00000233940	0	0	0	0	0	0	0	0	0	0	0	0	0	0	0	0	0	0	0	0	0	0	0	0	0	0	0	0	0	0	NA
ENSG00000197056	2.39539	1.99875	2.35943	2.79856	0.977414	2.61167	0.375355	2.6625	3.23598	2.49937	2.49372	3.02743	0.717262	1.79953	1.3532	2.42245	2.21939	0.422441	3.0183	3.36879	1.24558	2.36804	2.77315	2.46731	2.77405	1.93362	3.40094	3.07526	3.30663	3.08923	0.332944
ENSG00000228348	0	0	0	0	0	0	0	0	0	0	0	0	0	0	0	0	0	0	0	0	0	0	0	0	0	0	0	0	0	0	NA
ENSG00000116560	6.88056	6.23664	6.69796	6.79555	6.14734	7.03137	6.10241	7.10348	7.16999	6.52489	6.50979	7.40438	5.2875	5.89127	5.17403	6.83477	6.68704	5.64297	7.54217	7.73229	5.67947	6.7725	6.93259	6.65976	6.94642	6.32032	6.8596	7.1103	7.40432	6.94148	0.146923
ENSG00000201868	0	0	0	0	0	0	0	0	0	0	0	0	0	0	0	0	0	0	0	0	0	0	0	0	0	0	0	0	0	0	NA
ENSG00000263591	0	0	0	0	0	0	0	0	0	0	0	0	0	0	0	0	0	0	0	0	0	0	0	0	0	0	0	0	0	0	NA
ENSG00000146463	4.10745	3.75326	4.15771	4.34547	3.78969	4.21918	2.90639	4.29644	4.4655	3.91968	3.75453	4.51773	2.68972	3.35756	2.50155	4.16211	4.07348	3.0556	4.50831	4.9146	2.70591	4.08874	4.46968	3.67772	4.10852	3.57184	4.95517	4.50733	4.63247	4.20935	0.210386
ENSG00000240374	0	0	0	0	0	0	0	0	0	0	0	0	0	0	0	0	0	0	0	0	0	0	0	0	0	0	0	0	0	0	NA
ENSG00000201542	0	0	0	0	0	0	0	0	0	0	0	0	0	0	0	0	0	0	0	0	0	0	0	0	0	0	0	0	0	0	NA
ENSG00000229994	2.29071	2.16636	2.53038	2.47213	0.581799	2.5309	1.4367	2.3214	2.85628	2.32375	2.40955	2.63933	0.594055	1.76273	1.08017	2.09231	2.39952	0.595645	2.03911	3.68542	2.08812	2.22166	2.70619	1.91792	1.99244	2.07504	1.04809	3.11469	2.96783	2.52538	0.440665
ENSG00000227409	0	0	0	0	0	0	0	0	0	0	0	0	0	0	0	0	0	0	0	0	0	0	0	0	0	0	0	0	0	0	NA
ENSG00000202129	0	0	0	0	0	0	0	0	0	0	0	0	0	0	0	0	0	0	0	0	0	0	0	0	0	0	0	0	0	0	NA
ENSG00000142687	4.07278	4.64066	3.91482	4.46158	4.30569	4.48058	4.57926	4.28909	4.46858	3.98941	3.94976	4.67872	3.96796	4.10988	3.88463	4.89446	4.63889	4.13444	4.93697	4.5828	4.04221	5.10745	4.78208	4.39952	4.68469	4.49307	4.52849	5.15858	4.49437	4.44721	0.144646
ENSG00000236274	0	0	0	0	0	0	0	0	0	0	0	0	0	0	0	0	0	0	0	0	0	0	0	0	0	0	0	0	0	0	NA
ENSG00000020129	3.72661	4.87002	4.66354	4.80125	8.52376	3.99471	3.35756	4.22133	5.24402	4.31497	4.38039	4.90318	3.87358	3.81513	2.7065	4.36347	3.81325	3.22104	5.36588	5.05403	2.58406	5.92203	4.843	3.8554	4.14163	4.06565	4.85866	4.97818	4.99258	4.75803	0.491524
ENSG00000239636	0.0658329	0	0	0.0329356	0.678211	0	1.7971	0.0197763	0.512875	0	0	0.772224	0	0	0	1.07621	0	0	0.606959	0	0	0	0	0.858984	2.36723	0	0.19041	0	0.390918	0.284401	0.893855
ENSG00000116819	1.12466	0	0.881199	0.874035	4.37258	1.41203	0.58673	2.89834	2.70923	1.05652	1.28119	2.63054	0	0.166464	0	1.75609	0.823462	0	2.84396	2.62606	0	2.90972	2.00287	1.28521	2.06189	0.729218	2.65645	0.584608	2.43818	2.89156	0.674853
ENSG00000126067	5.75684	5.73495	5.98488	5.82331	5.27427	5.76413	5.7991	6.13186	6.02227	5.60378	5.74856	5.9609	4.62846	5.03983	5.38752	6.01666	5.42884	5.85984	5.96994	5.72211	4.37416	5.63839	5.68366	5.48655	5.84842	5.29995	5.57104	5.68985	6.01817	5.81916	0.0836137
ENSG00000239859	0	0	0	0	0	0	0	0	0	0	0	0	0	0	0	0	0	0	0	0	0	0	0	0	0	0	0	0	0	0	NA
ENSG00000142686	3.93299	3.86149	4.84307	4.04241	5.43102	3.71706	2.5723	4.11783	4.29154	4.45157	4.13841	4.28933	3.0553	2.38098	1.88246	4.27621	2.97461	3.53564	4.90479	4.03822	1.58323	4.09117	4.03804	3.61851	3.92129	3.29343	4.44563	3.68844	4.78217	3.98213	0.30952
ENSG00000092853	0	0	0	0	0	0	1.75411	1.03024	0	0	0	0	0	0	0	0	0	0	0	0	0	0	0	0	0.905277	0	3.18741	0	0	0	0.960084
ENSG00000232335	0	0	0	0	0	0	0	0	0	0	0	0	0	0	0	0	0	0	0	0	0	0	0	0	0	0	0	0	0	0	NA
ENSG00000134698	4.05419	2.98319	4.22611	4.39668	3.34338	4.05187	4.54256	4.42536	4.31417	3.98279	4.11835	4.24162	2.9835	2.81791	2.57988	4.76096	3.9375	3.49619	4.21821	4.10544	2.87098	3.64534	4.23341	3.88252	4.88709	3.89392	3.94812	3.85469	4.62357	4.26697	0.2041
ENSG00000092847	3.05347	3.35966	3.56196	3.54583	3.2164	3.12434	3.13114	3.39614	3.61604	3.18246	3.05403	3.38318	2.05599	2.27329	1.47967	3.46066	3.0239	1.97547	3.60702	3.62436	1.97601	3.52009	3.61971	3.37842	3.63159	2.81035	3.29482	3.38084	3.74012	3.43212	0.16867
ENSG00000271164	0	0	0	0	0	0	0	0	0	0	0	0	0	0	0	0	0	0	0	0	0	0	0	0	0	0	0	0	0	0	NA
ENSG00000271914	0.179387	0.772101	0.732269	0.776801	1.83193	0.235501	0.29024	0.822578	0.749835	0.323995	0.297559	1.37104	0	0.10841	0	1.1028	0.122151	0	1.22176	0.794322	0	1.90652	1.20808	0.903538	1.45585	0.0752457	2.16505	1.40163	0.678998	0.458367	0.684312
ENSG00000126070	2.23639	1.65264	2.32248	2.36304	1.80881	2.18916	1.00012	2.03303	2.4999	2.05905	2.081	2.49672	0.753103	1.16256	0.839111	2.41319	1.78021	0.887003	2.94767	2.74121	0.691425	3.4127	2.42974	1.92327	2.15665	1.62569	2.4898	2.65005	2.74481	2.28043	0.421448
ENSG00000271554	0	0	0	0	0	0	0	0	0	0	0	0	0	0	0	0	0	0	0	0	0	0	0	0	0	0	0	0	0	0	NA
ENSG00000232862	0	0	0	0	0	0	0	0	0	0	0	1.53415	0	0	0	0	0	0	0	0	0	0.345429	0	0	0	0	4.37074	0	0	0	0.985171
ENSG00000092850	0	0	0	0	1.35239	0.291898	0	0	2.93725	0	0	6.51948	0	1.77544	0	3.93944	0	0	0.240277	0.291033	0.96794	3.28132	0.753169	0	0	0	7.02385	2.85596	0.837308	0	0.872145
ENSG00000116863	5.06099	5.69636	5.20562	5.32432	4.73128	5.15112	5.08955	5.75323	5.54883	4.9809	5.33866	6.48844	3.77894	4.99153	4.05684	5.50328	5.06721	4.74264	5.56795	5.42522	3.71023	5.15749	5.33024	4.8119	5.43573	4.6298	6.08997	5.47767	5.38365	5.44864	0.210852
ENSG00000171812	3.11096	0.690864	5.94641	4.6505	1.74889	3.62365	0	3.0205	4.5864	3.08127	4.14981	3.29484	1.5971	1.03064	0	3.00736	3.62047	0	5.32971	2.93985	0	3.07832	3.74436	2.04269	3.99361	3.93432	1.22681	4.18504	3.64605	3.77229	0.541269
ENSG00000054116	5.01219	5.57931	5.38161	5.26249	4.49352	5.17942	4.50992	5.35591	5.26553	5.22824	5.32028	5.194	4.03504	4.5743	3.93079	5.15605	5.02603	3.856	5.2044	4.8333	3.78658	5.53977	5.31725	4.86949	5.29505	4.84141	5.71827	5.94134	5.29475	5.22078	0.162609
ENSG00000116871	6.89901	5.5821	7.23492	7.10692	6.87601	6.77938	6.35479	6.99874	6.597	7.09867	7.06505	6.49048	6.9944	5.32036	3.33632	7.08699	6.10077	7.46461	7.0701	5.99038	3.62158	6.60874	6.742	6.12438	6.51427	6.25795	5.52826	6.5814	6.87144	6.62508	0.147899
ENSG00000264592	0	0	0	0	0	0	0	0	0	0	0	0	0	0	0	0	0	0	0	0	0	0	0	0	0	0	0	0	0	0	NA
ENSG00000054118	6.08679	5.98065	6.39418	6.39813	5.23345	6.19351	6.0018	6.39929	6.38971	6.08964	6.25895	6.3734	5.0556	5.14032	4.99882	6.27271	6.00282	6.6326	6.43657	6.40469	4.70614	5.99702	6.56827	5.91636	6.29875	5.76332	6.10432	6.57662	6.52012	6.31705	0.0908071
ENSG00000231849	0	0	0	0	0	0	0	0	0	0	0	0	0	0	0	0	0	0	0	0	0	0	0	0	0	0	0	0	0	0	NA
ENSG00000214193	1.73206	0.660687	1.86598	2.19919	2.28237	4.7082	2.98065	4.90146	3.71244	2.10019	2.75177	2.21026	1.02746	3.81297	0.00571986	3.45316	4.77612	0.315585	2.32656	3.99847	0	2.36509	4.11534	3.50815	2.32339	0.806345	4.06522	6.28773	3.09893	4.42099	0.580328
ENSG00000142694	5.59985	4.80729	6.3257	5.29899	2.86043	6.07807	3.53301	6.15052	6.44839	4.92972	4.78858	5.62289	3.65226	5.58242	2.76711	5.76644	5.57112	2.21165	5.60649	6.03237	2.5605	4.28472	5.84865	4.6589	6.14548	4.4025	4.12057	6.19493	6.14325	6.03013	0.232235
ENSG00000116883	3.02834	1.83265	3.76604	2.58199	4.41673	4.97021	1.557	5.33244	4.75673	2.59675	2.9567	3.70864	2.16197	4.21249	1.12151	4.26634	4.78602	2.07419	3.99289	5.63731	0.0778307	3.80572	4.74663	3.40903	4.41883	1.53296	4.23674	6.58922	4.84596	5.0994	0.466579
ENSG00000196182	5.1732	3.94985	5.85584	5.71222	3.82378	5.04722	6.30836	5.23462	5.32366	5.55217	5.67858	5.34468	4.54528	4.62421	4.57974	5.78625	5.23976	6.1826	5.22222	5.94744	4.50426	5.40486	5.39739	4.84688	5.58261	5.18586	6.46823	5.39713	5.36591	5.28421	0.189135
ENSG00000181817	5.03178	4.56473	5.24238	5.24782	4.73094	4.96771	5.56768	5.02331	5.18849	5.44792	5.22025	5.23014	4.80105	4.64339	4.28203	5.05082	4.54254	5.9518	5.15976	5.11815	3.42524	5.40204	5.38765	4.97767	5.70817	4.81391	5.19118	5.19054	5.38396	4.90133	0.157354
ENSG00000222821	0	0	0	0	0	0	0	0	0	0	0	0	0	0	0	0	0	0	0	0	0	0	0	0	0	0	0	0	0	0	NA
ENSG00000116885	2.55877	2.68171	2.38908	2.71869	3.04713	2.92672	0	2.3898	3.09139	2.47095	2.50667	4.5326	1.41156	2.79216	0	3.27867	2.73732	1.03768	3.12829	3.29224	1.26298	4.68008	3.05451	1.26448	0.465026	2.23797	6.23517	3.78794	3.5063	2.49039	0.603246
ENSG00000201448	0	0	0	0	0.0584805	0	0	0	0	0	0	0.14872	0	0	0	0	0	0	0	0	0	1.0532	0	0	0	0	0	0.0708067	0.0370548	0	0.989685
ENSG00000116898	5.40326	5.1682	5.09975	5.17036	4.40526	5.31358	4.60485	5.20042	5.03078	5.11272	5.2179	4.92159	4.84919	4.94675	5.04779	5.27129	4.92872	5.86585	5.00239	4.82791	4.04188	5.19898	5.18784	4.69435	5.00337	5.02376	6.89422	5.20759	5.14875	5.01517	0.270202
ENSG00000119535	4.67996	2.62843	3.23262	3.55462	2.51458	4.22428	10.9862	0.578927	2.75487	2.75166	2.52833	5.77214	2.98045	2.76344	3.46878	7.75088	3.11346	1.05276	3.72257	2.22045	1.25962	3.053	3.43789	3.24809	8.8056	3.30105	1.12054	3.28934	3.09131	3.26508	0.698164
ENSG00000230214	0	0	0	0	0	0	0	0	0	0	0	0	0	0	0	0	0	0	0	0	0	0	0	0	0	0	0	0	0	0	NA
ENSG00000234481	0	0	0	0	0	0	0	0	0	0	0	0	0	0	0	0	0	0	0	0	0	0	0	0	0	0	0	0	0	0	NA
ENSG00000163873	0	0	0	0.777727	2.58231	1.16762	0	0	0.773636	3.21323	2.23708	0	0	0	0	0	0	0	5.1138	0	0	4.38763	1.57922	1.87465	0	1.10224	0.377904	0	0	0.810892	0.859177
ENSG00000264698	0	0	0	0	0	0	0	0	0	0	0	0	0	0	0	0	0	0	0	0	0	0	0	0	0	0	0	0	0	0	NA
ENSG00000207328	0	0	0	0	0	0	0	0	0	0	0	0	0	0	0	0	0	0	0	0	0	0	0	0	0	0	0	0	0	0	NA
ENSG00000223944	0	0	0	0	0	0	0	0	0	0	0	0	0	0	0	0	0	0	0	0	0	0	0	0	0	0	0	0	0	0	NA
ENSG00000252368	0	0	0	0	0	0	0	0	0	0	0	0	0	0	0	0	0	0	0	0	0	0	0	0	0	0	0	0	0	0	NA
ENSG00000230451	0	0	0	0	0	0	0	0	0	0	0	0	0	0	0	0	0	0	0	0	0	0	0	0	0	0	0	0	0	0	NA
ENSG00000233621	2.3693	3.78091	3.42537	2.6663	1.07328	2.86573	1.68182	3.44153	2.90042	2.11993	2.4091	2.44652	1.20354	2.62452	2.67026	3.2687	2.91218	2.20527	3.0585	2.37132	1.69001	3.06149	4.15724	2.87814	2.60336	2.52582	2.74495	2.41335	2.28912	2.79959	0.382047
ENSG00000163874	4.91278	4.72179	4.69616	5.01903	0.968102	5.14205	5.55711	5.90757	4.18781	4.47399	5.21329	5.39222	3.0936	4.17321	4.15614	6.46558	5.23702	3.27176	3.6403	3.77317	3.33462	4.28147	6.11091	5.11242	4.88385	5.09571	3.75669	3.99347	3.23303	5.43893	0.31319
ENSG00000163875	4.89894	4.53141	5.48916	5.3579	5.16926	5.15776	4.10411	5.20337	5.46799	5.01678	4.94547	5.20096	3.51775	4.37841	3.58864	5.10701	5.05373	4.22067	5.28672	5.39931	3.83927	6.28222	6.06836	4.69844	4.74263	4.56387	5.51726	5.21703	5.46729	5.24495	0.218075
ENSG00000263675	0	0	0	0	0	0	0	0	0	0	0	0	0	0	0	0	0	0	0	0	0	0	0	0	0	0	0	0	0	0	NA
ENSG00000163877	3.02604	2.73938	3.03368	3.13015	2.25842	3.2269	2.64922	3.44756	3.26589	3.029	3.14237	3.53171	1.52561	2.03862	2.2017	3.17697	2.94781	1.84233	3.31196	3.37694	1.67252	3.16627	3.26137	3.13059	3.47161	2.78591	4.10694	3.1758	3.582	3.18244	0.291941
ENSG00000232273	0	0	0	0	0	0.0678612	0	0.0760234	0	0	0	0	0	0	0	0	0	0	0	0	0	0	0	0	0	0	0	0	0	0	0.969219
ENSG00000237749	0	0	0	0	0	0	0	0	0	0	0	0	0	0	0	0	0	0	0	0.90986	0	0	0	0	0	0	0.0221771	0	0.0170783	0	0.998512
ENSG00000163879	2.05988	3.08916	2.48981	2.98489	3.161	3.43041	0	0.96455	3.42388	2.88549	2.85092	5.47503	1.25026	3.57073	2.17672	3.95158	3.11515	0	3.8012	4.33497	3.0284	5.32822	4.05631	2.09862	0.910796	3.2936	6.22736	4.70893	3.76937	2.26312	0.532248
ENSG00000134697	4.41058	3.83867	4.30084	4.03162	2.81857	4.45308	3.71319	4.75266	4.57079	4.01344	4.09141	4.49332	3.07088	3.17152	3.18094	4.56802	4.21069	4.19867	4.51053	4.43877	2.94866	4.2454	4.19253	3.8895	4.10113	3.88736	4.75514	4.19029	4.62175	4.36295	0.14954
ENSG00000169218	3.31721	0	2.57083	1.45971	0	2.42356	0	2.8677	6.0291	1.50985	1.5168	5.40483	0	0.602465	0	2.93005	1.11737	0	0	1.99447	0	0	3.54304	2.34011	0.552379	2.49498	0	0	6.32038	5.20487	0.73878
ENSG00000116922	3.1219	2.79678	3.12928	3.19283	2.4154	3.29703	1.96123	3.31936	3.26541	2.76025	2.89304	3.33416	1.33809	2.18422	1.53217	2.77031	2.97002	2.03085	3.35646	3.57308	1.81009	2.9411	3.11442	2.59767	2.91022	2.54135	3.02154	3.2241	3.56154	3.12401	0.222974
ENSG00000134690	0.626074	0.826583	0.135866	0.884971	0	0.816667	4.53961	3.64747	1.48486	2.40562	2.61149	0.290408	0	0.518119	0	1.77808	1.6637	0	0.737383	0.516529	0	0.326793	0.720251	3.13487	3.19536	2.24038	5.71883	0.690939	0.63217	2.48611	0.777442
ENSG00000183317	0	0	0	0	2.23989	0	0	0	0	3.24587	0	0	0	0	0	0	0	0	0	0	0.447719	3.46135	0	3.252	0	0.444576	4.97766	0	0	0	0.909309
ENSG00000200421	0	0	0	0	0	0	0	0	0	0	0	0	0	0	0	0	0	0	0	0	0	0	0	0	0	0	0	0	0	0	NA
ENSG00000238871	0	0	0	0	0	0	0	0	0	0	0	0	0	0	0	0	0	0	0	0	0	0	0	0	0	0	0	0	0	0	NA
ENSG00000214141	0	0	0	0	0	0	0	0	0	0	0	0	0	0	0	0	0	0	0	0	0	0	0	0	0	0	0	0	0	0	NA
ENSG00000227416	0	0	0	0	0	0	0	0	0	0	0	0	0	0	0	0	0	0	0	0	0	0	0	0	0	0	0	0	0	0	NA
ENSG00000185090	0	2.0946	0.252488	1.37341	3.18487	0.936143	0.56078	1.28581	1.36539	1.24524	1.18274	0.628154	0	0.553218	1.36876	0.703432	1.49568	0.722195	0.975626	0	1.76001	4.2022	1.54664	1.00617	0.802323	0.887571	1.69047	0.847939	0.478858	1.30937	0.751708
ENSG00000196449	4.39475	4.10086	4.04393	4.28634	3.75815	4.38751	4.16636	4.9162	4.2268	4.03921	4.41158	4.65167	2.70895	3.7461	3.77049	4.59331	4.2547	3.05449	4.28549	4.22704	3.66954	4.7508	4.33932	4.13514	4.43859	4.14416	5.64168	4.25031	4.2258	4.49383	0.263661
ENSG00000197982	5.41538	5.93043	6.01199	5.47	6.11646	5.43488	4.20385	5.20156	5.60118	5.44133	5.64479	5.5505	4.88475	5.47225	4.98298	5.28636	5.09768	4.57993	5.81668	5.13733	4.54409	6.75521	6.03611	4.89471	5.00482	5.35389	5.71965	5.69715	5.40437	5.34653	0.207346
ENSG00000188786	2.71275	2.42241	2.75355	2.93758	2.26755	2.58913	3.66701	3.13007	3.09035	2.64697	3.15146	3.18596	1.137	1.7216	1.11329	3.06281	2.59118	2.25639	3.03895	3.11357	1.16446	2.88707	2.53616	2.49114	2.96793	2.26543	3.88612	2.65999	3.08574	3.11232	0.327759
ENSG00000230610	0	0	0	0	0	0	0	0	0	0	0	0	0	0	0	0	0	0	0	0	0	0	0	0	0	0	0	0	0	0	NA
ENSG00000235673	0	0	0	0	0	0	0	0	0	0	0	0	0	0	0	0	0	0	0	0	0	0	0	0	0	0	0	0	0	0	NA
ENSG00000204084	3.42038	2.54608	4.29623	3.91468	2.65572	3.36322	3.07909	3.00729	3.8646	3.6079	3.54424	3.82931	2.05194	2.57125	2.31788	3.77092	2.6342	1.78794	4.03343	4.58146	1.8095	3.33237	3.27094	3.31444	3.78349	3.10813	2.85932	3.63921	4.06191	3.48872	0.300295
ENSG00000252448	0	0	0	0	0	0	0	0	0	0	0	0	0	0	0	0	0	0	0	0	0	0	0	0	0	0	0	0	0	0	NA
ENSG00000222282	0	0	0	0	0	0	0	0	0	0	0	0	0	0	0	0	0	0	0	0	0	0	0	0	0	0	0	0	0	0	NA
ENSG00000183431	5.0642	4.72443	5.38134	5.19349	4.15024	5.13479	4.77919	5.38449	5.35185	4.95815	5.01488	5.5206	3.50756	4.16015	3.57326	5.17836	4.75901	4.92194	5.50046	5.48068	3.66597	4.84664	5.00615	4.81777	5.26332	4.58262	5.48969	5.13603	5.65267	5.10152	0.135905
ENSG00000212541	0	0	0	0	0	0	0	0	0	0	0	0	0	0	0	0	0	1.60516	0.165626	0	0	0	0	0	0	0	0	0	0	0	0.996442
ENSG00000183386	4.71837	4.21113	6.15301	6.29811	2.73866	4.80915	5.4554	5.1235	5.76765	5.85949	5.50666	6.06532	3.62511	3.80962	2.40479	5.29999	5.30357	9.88623	5.63923	5.54591	3.18797	3.61475	5.30704	4.35413	4.65199	4.71042	4.25763	4.31325	6.69866	5.17982	0.509557
ENSG00000183520	4.09177	4.24221	4.3011	4.89667	3.36345	4.04582	3.24003	4.32282	4.29946	4.42605	4.48494	4.63816	3.3145	3.06687	2.80638	4.09248	3.93661	5.99002	4.52786	4.08951	3.07397	3.82456	4.16196	3.66357	3.84384	3.92296	4.39483	3.90329	4.58523	4.17762	0.333728
ENSG00000185668	0	1.3566	0	2.12902	2.28253	0	0	5.21802	0	0	1.53323	0	0	0	0	0	0	0	5.83773	0	0	0	0	0	0	0	1.33355	0	0	0.153012	0.917268
ENSG00000224592	0	0	0	0	1.30215	0	0	2.88113	0	0	0	0	0	0	0	0	0	0	1.14151	0	0	0	0	0	0	0	0	0	0	0	0.970753
ENSG00000223589	0	0	0	0	0	0	0	0	0	0	0	0	0	0	0	0	0	0	0	0	0	0	0	0	0	0	0	0	0	0	NA
ENSG00000265596	0	0	0	0	0	0	0	0	0	0	0	0	0	0	0	0	0	0	0	0	0	0	0	0	0	0	0	0	0	0	NA
ENSG00000237290	0	0	0	0	0	0	0	0	0	0	0	0	0	0	0	0	0	0	0	0	0	0	0	0	0	0	1.82453	0	0	0	1
ENSG00000200796	0	0	0	0	0	0	0	0	0	0	0	0	0	0	0	0	0	0	0	0	0	0	0	0	0	0	0	0	0	0	NA
ENSG00000238063	0	0	0	0	0	0	0	0	0	0	0	0	0	0	0	0	0	0	0	0	0	0	0	0	0	0	2.14269	0	0	0	1
ENSG00000215895	0	0	0	0	0	0	0	0	0	0	0	0	0	0	0	0	0	0	0	0	0	0	0	0	0	0	0	0	0	0	NA
ENSG00000116954	5.02213	3.71086	4.63932	4.41235	3.30388	4.70757	3.6444	4.99437	4.41868	4.22936	4.31316	4.18994	2.88855	3.37276	2.4298	4.4398	3.75603	2.99324	4.52186	4.32372	2.25208	3.50074	3.84599	3.83117	3.93442	3.5854	4.35168	3.91404	4.38634	4.37243	0.222312
ENSG00000228436	3.13212	1.30583	1.39354	1.09853	2.08407	2.68796	0.263006	1.66956	1.40986	0.889785	0.603863	1.25905	2.76904	0.782011	0.133757	1.47707	0.81578	1.5931	1.98424	1.82468	0	2.2774	1.29855	0.724026	0.722272	0.793225	2.28025	1.56859	1.6933	1.24113	0.574559
ENSG00000214114	3.64417	3.54338	4.06221	4.27114	1.99156	3.98063	3.95342	4.05197	4.24613	4.1616	4.4967	4.38441	2.44996	3.92525	2.62479	4.15452	4.05866	3.02816	3.85884	3.91893	3.14193	4.04446	4.33661	4.02541	4.19731	3.91059	4.63381	4.44171	4.11975	4.31248	0.171481
ENSG00000131233	0	0	0	0	0	0	0	0	0	0	0	0	0	0	0	0	0	0	0	0	0	0	0	0	0	0	0	0	0	0	NA
ENSG00000158315	0.333348	0	0	3.40459	1.83678	0.356691	0	3.43359	1.8337	1.95492	2.95625	0	0	0	0	0	2.85508	0	0	0	0	1.01985	1.16328	0	0	1.78741	3.2203	0	0	3.59528	0.749137
ENSG00000199963	0	0	0	0	0	0	0	0	0	0	0	0	0	0	0	0	0	0	0	0	0	0	0	0	0	0	0	0	0	0	NA
ENSG00000207466	0	0	0	0	0	0	0	0	0	0	0	0	0	0	0	0	0	0	0	0	0	0	0	0	0	0	0	0	0	0	NA
ENSG00000235549	0	0	0	0	0	0	0	0	0	0	0	0	0	0	0	0	0	0	0	0	0	0	0	0	0	0	0	0	0	0	NA
ENSG00000174574	5.60498	5.21556	5.92626	5.9753	5.49604	5.37544	5.55248	5.28177	5.38157	5.85516	5.77492	5.98706	4.84704	5.25924	4.90482	5.81274	5.29642	4.63702	5.51504	5.41393	3.92214	6.3521	5.82242	5.54706	5.71764	5.62284	7.22352	5.75106	5.77902	5.29192	0.241372
ENSG00000168653	8.61411	8.59775	9.02793	8.61511	8.78599	8.59594	7.37514	8.59999	8.55386	8.92658	8.91529	8.76222	9.30018	8.29378	7.54687	8.45757	8.31852	9.00955	8.57506	8.84702	6.90688	8.88635	8.66952	8.15252	7.9209	8.40847	7.7591	8.65949	8.92145	8.61212	0.0904328
ENSG00000127603	4.62824	4.04145	5.72282	4.87252	4.61407	4.40956	3.36756	5.19227	4.74861	5.21753	4.93438	5.3283	3.90586	3.89596	2.89153	6.40541	4.20231	3.19467	4.25205	5.3337	2.62893	4.44629	4.65084	4.35248	4.68142	4.29692	4.4477	5.0721	5.88887	4.67557	0.300728
ENSG00000206654	0	0	0	0	0	0	0	0	0	0	0	0	0	0	0	0	0	0	0	0	0	0	0	0	0	0	0	0	0	0	NA
ENSG00000222378	0	0	0	0	0	0	0	0	0	0	0	0	0	0	0	0	0	0	0	0	0	0	0	0	0	0	0	0	0	0	NA
ENSG00000270040	0.00659612	0	1.11155	0	0	0	0	0	0.745585	0.168559	0	0.47118	0	0	0	0.979724	0	0	0	1.90304	0	0	0.81793	0	0	0	0.894232	0	1.58206	0.622421	0.865917
ENSG00000226438	0	0	0	0	0	0	0	0	0	0	0	0	0	0	0	0	0	0	0	0	0	0	0	0	0	0	0	0	0	0	NA
ENSG00000217897	0	0	0	0	0	0	0	0	0	0	0	0	0	0	0	0	0	0	0	0	0	0	0	0	0	0	0	0	0	0	NA
ENSG00000255103	1.15158	0.26675	1.87947	1.10641	0	0.698564	0	2.18919	0.62402	0.695112	0.917518	2.0053	0.124712	0.616406	0	1.20066	0.775952	0.522562	1.38563	1.35568	0	0	0.442394	0.196424	0.0244169	0.352869	0.848466	1.53826	2.20506	0.556965	0.664168
ENSG00000183682	0	0	0	0	0.586254	0	0	0	0.752928	0.101902	0	1.25615	0	0	0	0.0556216	0	0	2.13665	2.24245	0	0.779451	0.888383	0.44674	0.747141	0	2.43477	4.23312	1.12711	0.568937	0.884943
ENSG00000237624	0	0	0.0771541	0	0	0	0	0.0537572	0	0	0	0.519067	1.56725	0	0	0	0	0	0.626796	2.25126	0	0	0.73845	0	0	0	3.89142	1.394	0.70705	0	0.929688
ENSG00000182109	2.45835	2.79337	2.69415	2.91925	2.98377	2.75659	1.96182	2.85057	3.40156	2.99776	2.69928	3.86747	1.19681	2.87212	2.11613	3.05416	2.89993	1.84485	3.81178	4.41453	2.15987	4.29673	4.06114	3.19414	3.76312	2.50689	4.01006	4.82482	3.7388	3.35645	0.373345
ENSG00000243970	1.19829	1.22385	1.89437	1.9624	1.16453	1.64689	0	1.71134	2.11612	1.65701	1.46862	2.49511	0	0.842122	0	1.38421	1.38311	0	2.2787	2.79534	0	2.2271	2.04233	1.29349	1.25493	1.07819	1.64734	2.48678	2.60895	1.93946	0.494168
ENSG00000090621	6.78632	6.43889	6.65749	7.20168	4.85858	6.55674	6.31632	6.83883	6.75424	6.47343	6.32431	6.77796	6.26348	5.49999	5.3488	6.75264	6.3989	8.15658	6.59015	7.53262	7.70496	5.75253	6.41487	6.24928	6.51328	7.01559	7.31589	6.46964	6.96993	6.59881	0.199394
ENSG00000201457	1.17619	0.456327	1.02426	1.78162	0	1.11668	0	0.444843	1.14279	0.392749	0.123393	1.86388	0.206785	0	0	1.62532	0.969666	0	1.4954	2.31301	1.00502	0.527863	0.792329	0.865248	0.39228	0.7571	1.42402	1.25877	1.24651	0.86856	0.657744
ENSG00000228060	0	0	0	0	0	0	0	0	0	0	0	0	0	0	0	0	0	0	0.180212	0.334865	0.311048	0	0	0	0	0	4.0895	0.0758541	0	0	0.992394
ENSG00000163909	4.58963	4.34492	6.98351	3.5605	2.61623	4.12558	0	2.05025	5.72978	3.59575	3.15151	5.4678	5.31693	3.91699	1.82475	5.67385	2.13159	2.30638	4.98352	4.95304	5.55801	4.96015	5.05975	3.07521	3.6293	3.2536	5.37955	5.58791	5.86043	4.68557	0.420366
ENSG00000225903	0	0	0	0	0	0	0	0	0	0	0	0	0	0	0	0	0	0	0	0	0	0	0	0	0	0	0	0	0	0	NA
ENSG00000116981	0	0	0	0	0.823926	0	0	0	0	0	0	0	1.67317	0	0	0	0	3.58559	0	0	0	0	0	0	0	0	0	0	0	0	0.975985
ENSG00000116983	0	0.975565	0	0	6.80874	0	0	0	0	0	0	0	0	2.4008	0	0.135497	0	1.56163	0	2.22744	1.85464	1.50389	0	0	0	0	3.54912	0	0	0	0.928041
ENSG00000084072	3.60015	3.31223	4.09355	4.23266	2.9999	3.86901	3.43218	3.94979	4.15264	3.83049	3.73992	4.20622	2.53749	3.21045	2.70789	3.87319	3.67427	2.93139	4.50378	4.38612	3.12439	3.84178	4.07798	3.87049	4.14774	3.48643	4.70386	4.24734	4.29295	3.96742	0.206083
ENSG00000225333	0	0	0	0	0	0	0	0	0	0	0	0	0	0	0	0	0	0	0	0	0	0	0	0	0	0	0	0	0	0	NA
ENSG00000252413	0	0	0	0	0	0	0	0	0	0	0	0	0	0	0	0	0	0	0	0	0	0	0	0	0	0	0	0	0	0	NA
ENSG00000116985	0.924323	0.824733	0.873694	1.5398	1.41377	0.858095	0.83891	0.944235	2.1384	2.38014	1.69901	1.83615	0	0.429928	0	1.54326	1.46172	0	5.98457	1.02434	2.14385	2.49545	2.40495	2.68048	1.52903	1.43999	2.49864	2.83885	1.63776	2.14088	0.754885
ENSG00000198754	0	0	0	0	0	0	0	0.445867	0	0	0	0	0.167778	0	0	0	0	0	2.0414	0.4466	0	0	0	0	0	0	6.14438	0.404366	0	0	0.980324
ENSG00000261798	0	0	0	0	0	0	0	0	0	0	0	0	0	0	0	0	0	0	1.02475	0	0	0.60749	0	0	0.169199	0	1.16138	0.683435	0	0	0.926221
ENSG00000229213	0	0	0	0	0	0	0	0	0	0	0	0	0	0	0	0	0	0	0	0	0	0	0	0	0	0	0	0	0	0	NA
ENSG00000043514	3.83205	3.48676	3.988	4.88407	3.53437	4.25501	3.40415	4.82744	4.71599	4.17708	4.41909	4.64567	3.28929	3.66803	2.89632	4.09477	4.28374	2.75063	4.67938	4.77821	3.72603	4.75198	5.05854	3.97843	4.2442	3.82415	4.60591	5.07491	5.09508	4.85462	0.182924
ENSG00000202222	0	0	0	0	0	0	0	0	0	0	0	0	0	0	0	0	0	0	0	0	0	0	0	0	0	0	0	0	0	0	NA
ENSG00000116990	0	0	0	5.04169	0	0.0015936	0.795523	4.92774	2.15037	1.16123	2.98276	0	0	0	2.06143	0.947178	2.69706	0	0.47861	0	3.60569	1.73676	2.38499	2.14899	1.63442	1.90805	1.03568	1.83171	0	3.69911	0.738806
ENSG00000236546	0	0	0	0	0	0	0	0	0	0	0	0	0	0	0	0	0	0	0	0	0	0	0	0	0	0	0.365616	0	0	0	1
ENSG00000207356	0	0	0	0	0	0	0	0	0	0	0	0	0	0	0	0	0	0	0	0	0	0	0	0	0	0	0	0	0	0	NA
ENSG00000168389	2.20373	0	0.0160167	2.23809	3.54083	2.26792	2.15086	6.3072	2.88791	2.91475	2.91732	2.90141	0	2.38108	6.6561	5.81289	2.58887	0	4.68498	1.85175	0	3.95612	2.38752	5.1846	1.41246	0.900069	5.78069	4.11825	2.47058	4.60249	0.593433
ENSG00000228477	0.20879	0	0	0.691006	0.894342	0.308637	0.230953	4.18595	1.0005	0.851401	0.966072	0.772561	0	0.18864	4.1869	3.54169	0.752415	0	2.9053	0.668509	0	2.01436	1.13715	2.90459	0	0	2.84865	2.40378	0.743506	2.90823	0.72717
ENSG00000131236	7.56674	6.51352	8.5766	7.71149	6.10974	7.38655	9.07568	7.54399	7.62717	7.48213	7.91606	7.71353	5.37627	6.56052	5.60052	8.00774	6.99543	4.67653	8.13898	6.92995	5.08497	6.44566	7.03913	7.36168	7.98984	6.986	6.87367	7.24172	7.92013	7.42364	0.221869
ENSG00000131238	6.01284	5.67871	6.59566	6.36373	6.22914	6.18638	7.26547	5.77242	6.51956	5.89327	5.65782	6.36342	4.4515	5.38857	3.45668	6.74935	5.92102	3.55175	6.38732	6.2844	4.40949	6.11036	6.02788	5.58749	7.35142	5.40764	5.5148	6.08095	6.73499	6.00788	0.209111
ENSG00000226745	0	0	0	0	0	0.20463	0	0	0	0	0	0	0	0	0	0	0	0	0	0	0	0	0	0	0	0	1.41055	0	0	0	0.994998
ENSG00000117000	4.04722	2.77973	4.17962	4.17043	3.29564	4.16249	4.16788	4.27175	4.2442	3.60522	3.61993	3.92029	2.47479	2.53028	2.4871	4.18343	3.29269	2.91699	4.32575	4.25211	1.80129	3.40955	3.83071	3.48168	3.57147	3.0913	4.33316	3.84532	4.2522	4.16886	0.169357
ENSG00000207508	0	0	0	0	0	0	0	0	0	0	0	0	0	0	0	0	0	0	0	0	0	0	0	0	0	0	0	0	0	0	NA
ENSG00000188800	0	0	0	0	0	0	0	0	0	0	0	0	0	0	0	0	0	0	0	0	0	0	0	0	0	0	7.64094	0	0	0	1
ENSG00000259943	3.32291	2.90141	4.00559	3.92427	4.11378	3.80079	2.28858	3.20044	3.88584	3.65211	3.54807	4.12591	2.32952	3.40335	1.75206	3.4241	3.25569	2.82759	4.47444	3.99223	2.0036	4.44309	4.21119	3.61692	3.86971	3.17519	4.24311	4.41743	4.3532	3.67142	0.215783
ENSG00000084073	5.0097	5.06362	5.69106	5.23677	4.10962	4.99747	4.29044	5.21167	5.27538	5.09747	5.17936	5.51191	3.93735	4.43288	4.22959	4.96906	4.8811	3.77969	5.18477	4.97513	3.50812	4.38855	4.97277	4.78776	4.30698	4.72014	4.06248	5.03945	5.89071	5.07521	0.192619
ENSG00000231296	0	0	0	0	0	0	0	0	0	0	0	0	0	0	0	0	0	0	0	0	0	0	0	0	0	0	0	0	0	0	NA
ENSG00000049089	1.67895	2.24122	4.05384	4.96284	5.52866	3.61058	4.89623	2.43886	3.48491	2.70843	2.04841	4.87928	0.149528	4.18707	0	3.1079	4.34137	0	3.54229	1.49849	0.662729	7.73757	4.63649	4.01165	4.11266	3.68099	2.69053	4.622	3.67655	1.87969	0.601888
ENSG00000227311	0	0	0	0	0	0	0	0	0	0	0	0	0	0	0	0	0	0	0	0	0	0	0	0	0	0	0	0	0	0	NA
ENSG00000084070	5.78091	4.55504	5.42126	5.86924	5.77206	5.28337	9.24249	5.30783	5.23747	5.0501	4.67611	5.96172	3.48959	4.5215	5.04342	6.6828	5.39797	4.38009	5.46298	4.44813	3.70436	6.08595	5.01571	7.1424	8.35462	5.23357	4.98686	5.12597	4.99322	5.03104	0.425385
ENSG00000213172	0	0	0	0	0	0	0	0	0	0	0	0	0	0	0	0	0	0	0	0	0	0	0	0	0	0	0	0	0	0	NA
ENSG00000187801	0	0	0	0.221883	0.950011	0	0.812802	0.608852	0.616272	0	0	0.197704	0	0	0	0.0563716	0	0	0	0.283257	0	0.892699	0	0	0.290558	0	1.12407	0	0.473131	0.0511705	0.832667
ENSG00000260920	0	0	0.255711	0.427528	1.84881	0	0.644757	0.824263	0.685333	0	0	0.158909	0	0	0	0.22218	0	0	0	0.0895552	0	1.47161	0.153653	0.224715	0.756018	0	1.04601	0	0.576122	0.190492	0.855884
ENSG00000187815	1.58139	0.587665	1.94556	2.17696	1.5116	1.64169	1.0525	1.5424	1.9629	1.78789	1.60783	2.27713	0.147599	0.828899	0.118886	1.59644	1.25623	0	2.11835	1.94629	0.53126	1.28944	2.08011	1.71128	2.23231	1.02441	2.743	1.8763	2.3056	1.87137	0.464338
ENSG00000238287	0.153804	0.355156	0.610404	0.903368	0	0.460187	0	0	0.437518	0.718497	0.42817	0.942051	0	0.182526	0	0.276401	0.176773	0	0.359792	1.04776	0	1.574	1.11562	0.46382	0.914336	0	1.44596	1.6275	1.3387	0.517771	0.694419
ENSG00000164002	1.83516	1.68944	1.66116	2.0823	1.39391	2.03299	1.44524	1.92371	2.18713	1.96208	1.76313	2.31908	0.251423	1.26872	1.07114	1.96691	1.8666	0.203622	1.85298	1.96379	0.687565	1.795	2.11067	2.25564	2.76729	1.38994	2.27767	2.06361	2.50984	2.00561	0.379001
ENSG00000227278	0	0	0	0	0	0	0	0	0	0	0	0	0	0	0	0	0	0	0	0	0	0	0	0	0	0	0	0	0	0	NA
ENSG00000238186	0	0	0	0	0.317295	0	0	0	0.661675	0	0	0.328295	0	0	0	0	0	0	0	0.371899	0	0	0.135945	0	0.413986	0	1.64067	0.325955	0.467255	0	0.936479
ENSG00000117010	1.35563	1.92338	1.41575	1.27327	1.06734	1.38852	0.379708	1.05543	1.63521	1.46268	1.04404	1.83564	1.15099	2.00891	2.71676	1.47372	1.11683	0	1.98668	1.61718	0.669603	0.984288	1.50432	1.26204	2.02155	1.14791	2.36756	1.90915	1.98541	1.37449	0.486999
ENSG00000236505	0	0	0	0	0	0	0	0	0	0	0	0	0	0	0	0	0	0	0	0	0	0	0	0	0	0	0	0	0	0	NA
ENSG00000233910	0	0	0	0	0	0	0	0	0	0	0	0	0	0	0	0	0	0	0	0	0	0	0	0	0	0	0	0	0	0	NA
ENSG00000117016	0.844074	1.38453	4.26722	2.61229	5.93203	1.4386	0	1.30537	1.89248	2.94023	2.24474	2.76113	0.444513	0.981819	0	2.97627	1.06677	0	2.60106	2.08278	0	0.576831	2.43392	2.03407	1.33668	2.30746	2.68483	1.31738	3.34637	1.85338	0.710893
ENSG00000237899	0	0	0	0	0	0	0	0	0	0	0	0	0	0	0	0	0	0	0	0	0	0	0	0	0	0	1.63267	0	0	0	1
ENSG00000272145	0.963022	1.65913	1.85466	2.76279	2.01282	1.52676	1.00506	1.18763	2.60196	2.40122	2.14969	2.88477	0.502543	2.20234	1.01248	1.76967	2.52572	1.4957	2.62986	3.07794	0.718794	2.99227	3.2545	2.55898	2.82851	1.84246	2.80126	3.19015	3.34841	2.28031	0.374969
ENSG00000066136	4.61091	4.33525	4.91297	5.03082	4.15591	4.94254	5.10572	4.99077	5.28129	4.75609	4.71157	5.23047	4.15589	4.36194	3.83033	4.76617	4.84226	4.60783	4.9465	5.319	3.54192	4.45698	4.88937	4.74384	5.38603	4.48181	4.7604	5.39322	5.39035	5.05336	0.120234
ENSG00000198974	0	0	0	0	0	0	0	0	0	0	0	0	0	0	0	0	0	0	0	0	0	0	0	0	0	0	0	0	0	0	NA
ENSG00000207962	0	0	0	0	0	0	0	0	0	0	0	0	0	0	0	0	0	0	0	0	0	0	0	0	0	0	0	0	0	0	NA
ENSG00000117013	1.99819	0	4.27297	3.8665	2.46525	2.02988	0	1.23063	2.72669	4.55515	4.20561	4.16304	0.857099	0	0	1.82182	2.71455	2.78198	2.13721	1.62122	0.76424	1.42502	3.34709	2.8374	0	2.77869	1.44845	0.93152	4.31832	2.53604	0.551251
ENSG00000264582	0	0	0	0	0	0	0	0	0	0	0	0	0	0	0	0	0	0	0	0	0	0	0	0	0	0	0	0	0	0	NA
ENSG00000179862	3.82916	4.34443	4.55915	4.36813	3.14005	5.98422	2.69727	5.79305	5.20375	5.1177	4.58907	5.06584	3.92049	4.69857	4.76097	4.37258	5.67909	4.13106	3.04419	4.43538	5.09952	3.23682	4.98072	3.73999	5.75061	4.1007	5.83551	4.00579	5.03041	5.39289	0.245585
ENSG00000229528	0	0	0	0	0	0	0	0	0	0	0	0	0	0	0	0	0	0	0	0	0	0	0	0	0	0	1.74772	0	0	0	1
ENSG00000228940	0	0	0	0	0	0	0	0	0	0	0	0	0	0	0	0	0	0	0	0	0	0	0	0	0	0	0	0	0	0	NA
ENSG00000233118	0	0	0	0	0	0	0	0	0	0	0	0	0	0	0	0	0	0	0	0	0	0	0	0	0	0	0	0	0	0	NA
ENSG00000171793	3.25753	3.70655	5.52961	5.30686	2.54693	3.06108	3.3053	3.74907	4.72083	4.91342	4.17984	5.51709	2.14745	3.04117	4.08897	3.79489	3.17102	2.9793	4.1035	3.89868	1.8453	3.25905	4.75229	4.57534	3.62979	3.49765	4.60819	3.16811	5.76237	4.18073	0.338541
ENSG00000171790	0	0	1.19132	0.816737	0	0	0	0	1.15048	0.97215	0.00410351	1.93114	0	0	0.846741	0.875834	0.214167	0	0.242042	1.67872	0	0.977321	1.71173	1.54252	0.106836	0	6.63221	0.8862	2.36212	0.894463	0.904309
ENSG00000010803	4.90993	4.64035	5.95503	6.01638	3.75836	5.10542	3.23145	4.2267	5.54015	5.7789	5.60093	5.72695	4.45117	4.59745	3.30001	5.05546	4.89354	4.51605	5.34151	5.90512	4.35966	5.34664	5.9366	4.88874	4.37422	5.10341	5.76969	5.39259	6.16214	5.11402	0.189508
ENSG00000215893	0	0	0	0	0	0	0	0	0	0	0	0	0	0	0	0	0	0	0	0	0	0	0	0	0	0	0	0	0	0	NA
ENSG00000235358	0	0	0	0	0	0	0	0	0	0	0	0	0	0	0	0	0	0	0	0	0	0	0	0	0	0	5.42097	0	0	0	1
ENSG00000213987	0	0	0	0	0	0	0	0	0	0	0	0	0	0	0	0	0	0	0	0	0	0	0	0	0	0	0	0	0	0	NA
ENSG00000204060	0.52031	0.720422	2.21938	2.46267	1.64226	1.34677	0	1.24901	2.39052	1.61881	1.51909	3.09706	0.566205	0.4009	0	0.733201	1.48571	0.985698	1.73706	3.77457	0	4.67767	2.53852	0.523144	0.280285	1.04204	3.12592	3.4691	3.73614	2.29755	0.664714
ENSG00000229901	0	0	0.860524	0.874185	0	0.598239	0	0	1.19692	1.07587	0.900038	1.84375	0	0.0381071	0	0.348529	0.536176	0	1.16831	2.37659	0	1.51846	2.81955	0	0.00398062	0.473979	0.50088	3.44194	2.70973	1.22923	0.788881
ENSG00000252563	0	0	0	0	0	0	0	0	0	0	0	0	0	0	0	0	0	0	0	0	0	0	0	0	0	0	0	0	0	0	NA
ENSG00000127129	0	0	1.96941	2.32182	0	2.77096	0	3.66652	4.88727	0.597109	3.3139	1.01057	0	2.49136	0	2.70975	3.3087	0	0.480528	0	0.305253	1.72196	3.45476	4.47892	0	0.0862981	0	0.0180504	1.65098	5.41898	0.73755
ENSG00000127124	1.58809	0.519863	0.447298	0.579821	1.89357	2.15152	1.31442	2.73669	0.679383	0.382592	1.19664	0.868732	0.0480097	0.274949	0	2.50523	1.89394	0	1.46725	0.65487	0	2.39781	1.99414	0.609903	1.43031	0.14529	0.675296	2.39023	0.741304	0.855072	0.625706
ENSG00000230881	0	0	0	0	0	0	0	0	0	0	0	0	0	0	0	0	0	0	0	0	0	0	0	0	0	0	0	0	0	0	NA
ENSG00000230638	0	0	0	0.0592986	0	1.27288	0	3.40839	0.168924	0	1.98035	0	0	0	0	1.47715	2.09066	0	0	0	0	0	1.22424	0	0	0	0	0.931483	0	1.51591	0.891536
ENSG00000264896	0	0	0	0	0	0	0	0	0	0	0	0	0	0	0	0	0	0	0	0	0	0	0	0	0	0	0	0	0	0	NA
ENSG00000227538	0	0	0	0	0	0	0	0	0	0	0	0	0	0	0	0	0	0	0	0	0	0	0	0	0	0	0.211471	0	0	0	1
ENSG00000228776	0	0	0	0	0	0	0	0	0	0	0	0	0	0	0	0	0	0	0	0	0	0	0	0	0	0	0	0	0	0	NA
ENSG00000044012	0	0	0	0	0	0	0	0	0	5.58636	0	0	0	0	1.74235	0	0	0	0	0	0	0	0	7.44199	0	3.97664	0	0	0	0	0.947616
ENSG00000197273	0	0	0	0	0	0	0	0	0	7.97042	0	0.260008	0	0	0	0	0	0	0	0	0	0	0	10.2162	0	0	0	0	0	0	0.97222
ENSG00000198815	4.95223	3.87012	4.88165	4.91834	4.24655	5.04711	3.84162	4.83211	5.18576	4.48866	4.44202	4.92458	3.54304	3.64583	3.11774	4.8947	4.39383	4.76076	5.37583	5.16894	3.40048	4.67712	4.71685	4.50934	4.52322	4.22096	4.83677	5.00391	5.35231	4.93017	0.157618
ENSG00000227527	0.0553217	0	0	0	0	0	0	0	0	0	0	0.114327	0	0	0	0	0	0	0	0	0	1.06488	0.0811853	0	0	0	1.19581	0.475067	0	0	0.948361
ENSG00000177181	0	0	0	0	2.98026	0	0.467905	0	0	1.55397	0.582066	0	0.929749	0	0	1.55361	0	0	0	0	0	1.19854	0	0	0	0.498288	0.951078	0	0	0	0.910501
ENSG00000235002	0	0	0	0	0	0	0	0	0	0	0	0	0	0	0	0	0	0	0	0	0	0	0	0	0	0	0	0	0	0	NA
ENSG00000066185	0.397482	1.84402	0	0.909651	1.81482	0.83917	0	0	1.24943	0.213664	0	3.26323	0	2.05481	1.15462	1.5705	0.12686	0.317432	0.866795	1.64496	0.452497	3.01304	1.18683	0	0.490513	0.354717	5.67768	2.35579	0.464343	0.183911	0.837421
ENSG00000127125	5.34965	5.61588	5.35945	5.56977	4.20797	5.46439	4.57208	5.53265	5.48493	5.27687	5.215	5.38306	3.98216	5.25856	4.56706	5.1629	5.40641	4.03765	5.424	5.16624	4.53444	4.93512	5.56003	5.39925	5.53074	5.32822	4.32575	5.65438	5.32741	5.36362	0.0953541
ENSG00000186409	0	0.165711	0.582768	0.257241	0.944477	0.655548	0	0	1.20751	0.0417523	0	2.67736	0	1.26427	0	1.19582	0.0910308	0	1.23226	1.56289	0	2.88605	0.866183	0	0	0	2.71953	2.50767	1.23882	0.465703	0.764903
ENSG00000230116	0	0	0	0	0	0	0	0	0	0	0	0	0	0	0	0	0	0	0	0	0	0	0	0	0	0	0	0	0	0	NA
ENSG00000236876	0.63141	0	0.542757	0	0	0.22574	1.34567	0	0	0	0	0	0	0	0	1.03234	0	0	0.514398	0	0	0	0	0	0.862458	0	0	0	0.222298	0	0.896696
ENSG00000200254	0	0	0	0	0	0	0	0	0	0	0	0	0	0	0	0	0	0	0	0	0	0	0	0	0	0	0	0	0	0	NA
ENSG00000236180	0	0	0	0	0	0	0	0	0	0	0	0	0	0	0	0	0	0	0	0	0	0	0	0	0	0	0	0	0	0	NA
ENSG00000171960	3.6886	3.46607	3.74986	3.79471	3.11633	3.97231	3.97961	4.10045	4.13728	3.67169	3.76578	4.00399	2.6826	3.1019	2.07284	3.93326	3.67665	2.34781	4.17015	4.24585	2.22365	3.2075	3.83996	3.84237	4.29119	3.40542	4.65951	4.36762	4.2167	4.10904	0.221605
ENSG00000234917	0	0	0.0514689	0.220679	1.7612	0.170208	0	0.269553	0.562892	0	0	0.719377	0	0	0	0	0	0	1.37121	1.06666	0	0.978646	1.05103	0.00821059	0.786393	0	3.08142	1.45604	0.632048	0.22698	0.873182
ENSG00000065978	9.28745	8.01998	9.64742	9.34991	7.02557	9.01198	9.07113	9.16144	9.1596	9.30627	9.19035	9.04611	8.71064	8.01926	7.2949	9.20641	8.33932	9.7408	9.33011	8.91057	7.1086	7.47243	8.80621	8.64255	8.69852	8.66956	10.356	8.85055	9.24583	8.91307	0.156786
ENSG00000164007	0	0	0	0	0	0.852033	0	0	0	0	0	0	0	3.67489	0	0	0	0	7.64129	0	0	0	0	0	0	0	0	0	0	0	0.979571
ENSG00000117385	4.9579	4.71834	5.2283	4.58922	3.22264	4.90106	3.84054	5.37158	5.41561	4.36148	4.28455	5.10655	3.36386	4.07247	4.2628	5.34637	4.06015	2.27034	5.80984	5.56997	3.03476	5.90328	4.87818	4.48682	5.47715	3.87357	5.57804	4.98891	5.52969	5.0091	0.219547
ENSG00000164008	2.65786	2.6418	2.80805	2.84519	2.57922	2.74392	2.25923	2.62201	2.82305	2.58472	2.51678	2.61767	1.88363	2.46087	2.24242	2.48446	2.154	2.09265	3.38193	3.1064	1.31307	3.22577	2.91483	2.49001	2.80449	2.21552	3.97961	2.81856	2.92687	2.83893	0.349669
ENSG00000228452	1.18291	0.92619	1.4308	1.51615	1.31564	1.42104	0.384466	1.33284	1.47616	1.10877	1.02274	1.59796	0.153164	0.485972	0	0.976646	0.86342	1.27436	2.03674	1.73814	0	1.46855	1.11322	1.23813	0.876248	0.636746	3.30985	1.28502	1.49278	1.25653	0.670666
ENSG00000177868	4.63163	3.30145	4.59284	4.37971	4.20337	4.58292	3.81653	3.9843	4.81551	4.25228	4.12	4.68169	2.92923	3.62586	2.6675	4.02255	3.49841	3.23958	5.23604	5.03857	1.96869	4.83898	4.14635	3.84411	4.15516	3.55593	5.78144	4.26788	4.82308	4.52619	0.297715
ENSG00000164010	3.23587	3.60369	3.05188	3.56629	1.93424	3.37563	2.64372	3.49137	3.41448	2.92527	3.03257	3.32795	1.22891	2.66165	2.87717	3.40567	3.15128	0.987402	3.64126	2.89626	2.50022	4.08871	3.51276	2.94543	3.5293	2.73702	2.77314	3.98402	3.37189	3.47196	0.263925
ENSG00000228192	0	0.241299	0	0	0	0	0	0	0	0	0	0	0	0	0	0	0	0	0.0249825	0	0	0	0	0	0	0	1.05205	0.429561	0	0	0.977193
ENSG00000164011	3.04907	3.526	3.40484	3.79809	2.52465	3.3304	2.66618	3.10127	3.93283	3.51511	3.38245	3.79907	2.1932	3.23245	3.30791	3.21055	3.29637	2.26291	4.13288	4.1076	2.4061	3.84769	4.05616	3.30316	4.10602	3.05387	3.73094	4.39208	4.26823	3.51333	0.230124
ENSG00000233708	0	0	0	0	0	0	0	0	0	0	0	0	0	0	0	0	0	0	0	0	0	0	0	0	0	0	2.45496	0	0	0	1
ENSG00000237090	0	0	0	0	0	0	0	0	0	0	0	0	0	0	0	0	0	0	0	0	0	0	0	0	0	0	0	0	0	0	NA
ENSG00000225099	0	0	0	0	0	0	0	0	0	0	0	0	0	0	0	0	0	0	0	0	0	0	0	0	0	0	0	0	0	0	NA
ENSG00000117394	4.54693	3.35414	6.01859	7.01649	5.76385	4.97368	5.42835	7.79852	6.99442	3.9696	6.31411	5.52897	3.90075	5.35902	1.63369	3.92395	5.73713	1.70522	9.38907	4.69491	1.46402	4.63963	5.1964	4.06512	4.76462	3.9494	3.42944	4.04836	4.77376	7.6415	0.490844
ENSG00000227533	0	0	1.96669	1.30473	0.949453	0.0171537	0	1.61822	1.69964	0.252661	0.792411	1.24888	0	0.122085	0	0	0	0	2.72233	0	0	2.43209	1.11038	0	0	0	0.536821	0.18851	1.05718	1.48184	0.78747
ENSG00000207256	0	0	0	0	0	0	0	0	0	0	0	0	0	0	0	0	0	0	0	0	0	0	0	0	0	0	0	0	0	0	NA
ENSG00000252803	0	0	0	0	0	0	0	0	0	0	0	0	0	0	0	0	0	0	0	0	0	0	0	0	0	0	0	0	0	0	NA
ENSG00000186973	0	0	0	2.09625	1.71949	0	0	1.84066	2.85104	0	0.392818	6.47582	0	0.867958	0	4.10621	0.600319	0	0	0	0	4.37408	3.25875	0	0	0	4.00907	0	0	2.12035	0.849642
ENSG00000117395	4.82195	4.79679	5.10925	4.93014	4.63753	4.88888	4.21725	5.28448	5.0341	4.69807	4.93755	5.2809	3.72153	4.86355	5.62781	4.88771	4.61656	4.23315	5.25026	4.90864	3.70634	5.82299	4.99946	4.35741	4.67827	4.52463	5.79533	5.15304	5.19072	5.07224	0.16962
ENSG00000243710	0	0	0	0	0.128932	0	0.340266	0	0.780893	0	0	4.27699	0	0	0	1.64725	0	0	0	0	0	1.75891	0	0	0	0	4.83881	0.554726	0	0	0.932386
ENSG00000199240	0	0	0	0	0	0	0	0	0	0	0	0	0	0	0	0	0	0	0	0	0	0	0	0	0	0	0	0	0	0	NA
ENSG00000179178	0	0	0	2.70399	3.80639	3.10396	0	3.62154	3.09453	3.56275	2.44593	3.98136	0	3.9742	0	6.71076	5.06695	0	0.241386	1.34831	5.68042	5.66869	5.12438	4.43544	0	4.78186	1.73569	6.42638	0	2.38315	0.623932
ENSG00000253313	0	0	0	3.21083	0	3.64901	0	4.13455	2.85819	4.18543	3.17519	1.88149	0	4.5207	1.22771	4.01791	4.73525	0	0	0	3.95619	3.92619	3.55615	4.76783	0	4.87542	0	5.13163	0	3.79949	0.580173
ENSG00000066056	5.76623	3.2298	3.86238	4.11111	2.54012	5.61198	0	2.75802	4.49136	3.67168	3.84859	4.43744	3.7491	3.8594	1.80304	5.74518	3.08417	3.06336	5.00816	3.47633	1.11594	3.54054	3.95862	3.63643	4.7546	3.09252	2.60731	5.32546	5.3245	4.23712	0.36644
ENSG00000117400	0	0	0	0	0	0	0	0	0	0	0	0	0	0	0	0	0	0	0	0	0	0	0	0	0	0	0.510974	0	0	0	1
ENSG00000234694	1.27457	0	0.141287	0.223861	0	1.79135	0	1.23741	0.756224	0.475181	0.314558	1.169	0	0.642785	0	0.85079	0.856474	0	1.64382	0	0.606427	1.00595	1.30503	0.427008	0.283435	0.755075	3.22871	2.22478	0.635173	0.748764	0.793139
ENSG00000117399	1.20823	1.17138	0.22858	1.34992	0	1.41093	5.0312	4.73425	2.13719	3.08174	3.88624	0.334111	0	1.8434	0.241689	2.39409	2.65803	0	1.37029	0.71878	0	0	0.895109	3.87013	4.24379	3.09799	6.64947	1.86041	0.252847	3.54132	0.732612
ENSG00000066322	6.44108	5.62497	6.07897	6.62563	5.61988	6.33411	5.76143	7.54735	6.23877	5.87009	6.76453	5.98329	4.41606	5.62284	4.51268	6.44282	6.29096	3.65569	6.79909	5.40778	4.72882	5.26071	6.30166	5.94936	6.18681	6.01282	4.99195	6.71066	6.05842	6.84137	0.225427
ENSG00000159479	5.37978	4.97884	5.44032	5.17502	4.52423	5.30708	4.8076	5.73474	5.39892	5.06155	5.32289	5.19861	3.63134	4.65288	4.67646	5.38278	5.12108	3.68475	5.44827	5.2703	4.11907	5.82773	5.26278	4.95747	5.25638	4.95829	5.41146	5.59551	5.33295	5.40024	0.133207
ENSG00000229431	1.60184	1.07268	0.553167	0.27952	1.35334	1.43616	0.260147	1.81258	1.05842	0.692799	1.0492	1.07283	0	0.633961	0.744379	1.47665	1.23262	0	1.94461	1.77434	0.657155	3.42447	1.40467	1.14537	1.40475	0.971806	3.40267	2.35329	1.39199	1.25861	0.657238
ENSG00000198198	3.75038	3.39395	3.73456	4.15226	3.05201	3.93294	3.17102	3.81175	4.01946	3.80133	3.75588	4.32069	2.45461	3.24414	2.56744	4.07943	3.62949	2.59354	4.3478	4.52031	2.71971	4.53876	4.28452	4.06497	4.26363	3.4963	4.83596	4.70988	4.45426	3.8999	0.224454
ENSG00000229372	0	0	0	0	0	0	0	0	0	0	0	0.0947187	0	0	0	0	0	0	0	0.207275	0	0	0.460319	0	0	0	0	0	0	0	0.977378
ENSG00000178922	4.95271	4.51177	5.42792	5.27541	3.92087	5.0418	1.99513	4.1352	5.63169	5.03463	4.46851	5.43639	3.09511	4.68141	4.58422	5.00835	4.58452	2.93041	5.25579	5.99087	4.918	5.21009	5.36167	4.8921	4.49579	4.81534	3.51722	5.31652	5.85508	5.11606	0.220253
ENSG00000229348	0	0	0	0	0	0	0	0	0	0	0	0	0	0	0	0	0	0	0	0	0	0.982775	0	0	0	0	0.505984	0	0	0	0.982246
ENSG00000142949	5.9672	3.61097	4.10846	6.4354	4.44655	6.14693	0	6.38444	5.73244	5.81289	5.99951	6.04077	1.62815	4.54807	5.67909	5.29703	6.53095	0.848563	5.71912	5.21084	4.83757	5.01927	6.16331	5.95165	2.42818	5.36727	4.00875	5.35805	5.82084	6.1241	0.257142
ENSG00000066135	3.83992	4.67242	3.77882	4.48969	3.50178	4.08788	3.45733	4.69818	4.4185	3.92262	3.85055	4.39555	2.37504	3.26911	2.97773	4.10398	4.13991	2.81201	4.20136	4.59718	2.56969	4.05042	4.16584	4.0877	4.252	3.58796	3.35416	4.39746	4.5425	4.26035	0.176795
ENSG00000236200	0.719896	1.53106	0	1.35529	0	1.20202	0.263444	1.41185	1.20448	0.371597	0.345573	1.08768	0	0	0.272571	0.805134	1.04944	0	1.59634	1.34208	0	1.65857	1.57591	0.870052	1.60135	0.0871316	2.17412	1.50219	1.18227	1.18898	0.615779
ENSG00000126091	3.62936	3.43551	4.20597	3.89917	3.92704	3.48883	1.77543	2.90686	4.04814	3.74612	3.76505	3.9124	3.05084	2.63324	2.27442	3.35404	2.41902	4.86032	4.44593	4.15206	1.55112	4.28301	3.83665	2.63479	2.95798	2.89403	5.34626	3.44736	4.38682	3.57579	0.358254
ENSG00000229444	0	0	0	0	0	0	0	0	0	0	0	0	0	0	0	0	0	6.88602	0	0	0	0.00705971	0	0	0	0	1.41413	0	0	0	0.992883
ENSG00000252201	0	0	0	0	0	0	0	0	0	0	0	0	0	0	0	0	0	0	0	0	0	0	0	0	0	0	0	0	0	0	NA
ENSG00000233674	0	0	0	0	0	0	0	0	0	0	0	0	0	0	0	0	0	0	0	0	0	0	0	0	0	0	0	0	0	0	NA
ENSG00000224751	0	0	0	0	0	0	0	0	0	0	0	0	0	0	0	0	0	0	0	0	0	0	0	0	0	0	0	0	0	0	NA
ENSG00000117407	0.766889	0	1.63474	1.23265	0.471338	0.853659	0	0	2.0924	0.8495	1.35602	1.34296	0	1.34712	0	1.35976	0.263531	0	1.7135	1.44129	0	2.70874	3.29847	0.345256	0	0.347599	1.71554	0.770795	2.15455	2.14191	0.718681
ENSG00000237950	0	0	1.13558	1.17039	0.647109	0.559083	0	0	0.762376	0.671244	0.548387	0.872868	0	0.276479	0	0	0.630811	0	1.39191	0.920796	0.0277843	2.00376	1.19038	0.396349	0.396944	0.117766	0	1.58647	1.52085	0.674817	0.733287
ENSG00000117408	3.95183	4.62118	4.47263	4.61968	5.44267	3.97464	3.12302	4.18604	4.60164	4.48852	4.62703	4.58101	4.09939	4.4098	3.21982	4.26476	4.2118	6.22415	5.16454	4.34859	2.76801	5.15823	4.73493	4.04822	4.24966	4.06244	6.46314	5.10522	4.94336	4.45058	0.316263
ENSG00000132768	4.17222	4.32356	4.21937	4.32494	3.62116	4.31997	3.93487	4.39136	4.30454	4.29335	4.36553	4.61126	3.37989	3.91081	3.62648	4.31494	4.10171	4.81294	4.61457	4.42638	3.91618	4.65522	4.59369	4.32736	4.88062	4.15147	4.50781	4.56694	4.62319	4.1366	0.127102
ENSG00000117410	5.81369	6.56142	5.98701	5.89272	6.2919	5.95293	7.48839	6.09504	6.0334	5.87319	5.8551	5.95645	4.97451	6.73053	5.7188	6.81048	6.29169	5.45423	6.24199	5.69326	5.67205	7.0161	6.44067	5.95698	6.90378	6.13666	5.88402	6.70075	5.96575	5.99887	0.185387
ENSG00000117411	4.86573	3.91222	5.08691	5.14067	5.00006	4.73198	2.73654	5.27424	5.22493	5.11972	5.16542	4.89308	4.02327	3.88706	4.01398	4.64976	4.43985	4.7336	5.15744	4.59567	4.41894	4.87088	5.17682	3.90497	3.71972	4.26538	4.96167	4.30406	5.1545	4.9892	0.129509
ENSG00000159214	1.81609	3.06975	2.80639	3.87651	3.27257	3.21834	0.81496	2.16116	3.79503	2.89175	2.54726	4.96524	0.102852	3.98801	1.68047	3.22562	3.35553	0	2.91876	3.03527	2.56556	5.38327	4.36225	2.67861	2.80602	2.68033	5.48308	5.01506	3.48323	3.0197	0.462072
ENSG00000196517	2.32042	4.96241	2.89452	4.39276	3.81699	2.75502	1.18175	5.42689	3.99406	3.7184	4.10022	3.78551	0.317655	1.78258	0.741147	4.24108	3.89383	0	2.11529	2.1302	1.65622	1.39388	2.73434	2.96658	1.51126	3.00453	0.763512	3.32551	4.129	5.13828	0.493157
ENSG00000230615	0	1.11495	0	0.782749	0	0	0	0	0	0	0	0	0	0	0	0	0	0	0	0	0	0	0	0	0	0	2.32931	0	0.196669	0	0.968995
ENSG00000227163	0	0	0	0	0	0	0	0	0	0	0	0	0	0	0	0	0	0	0	0	0	0	0	0	0	0	0	0	0	0	NA
ENSG00000271647	0	0	0	0	0	0	0	0	0	0	0	0	0	0	0	0	0	0	0	0	0	0	0	0	0	0	0	0	0	0	NA
ENSG00000239560	0	0	0	0	0	0	0	0	0	0	0	0	0	0	0	0	0	0	0	0	0	0	0	0	0	0	0	0	0	0	NA
ENSG00000171872	0	0	0	1.46614	0	0	0	0	0	0	0.302972	0	0	0	0	0.266679	0	0	0	0	0	0	0	0	0	0	4.52533	0	0.603893	0	0.979886
ENSG00000233514	0	0	0	0	0	0	0	0	0	0	0	0	0	0	0	0	0	0	0	0	0	0	0	0	0	0	0	0	0	0	NA
ENSG00000239275	0	0	0	0	0	0	0	0	0	0	0	0	0	0	0	0	0	0	0	0	0	0	0	0	0	0	0	0	0	0	NA
ENSG00000226804	0	0	0	0	0	0	0	0	0	0	0	0	0	0	0	0	0	0	0	0	0	0	0	0	0	0	0	0	0	0	NA
ENSG00000200171	0	0	0	0	0	0	0	0	0	0	0	0	0	0	0	0	0	0	0	0	0	0	0	0	0	0	0	0	0	0	NA
ENSG00000238037	0	0	0	0	0	0	0	0	0	0	0	0	0	0	0	0	0	0	0	0	0	0	0	0	0	0	0	0	0	0	NA
ENSG00000227994	0	0	0	0	0	0	0	0	0	0	0	0	0	0	0	0	0	0	0	0	0	0	0	0	0	0	0	0	0	0	NA
ENSG00000271329	0	0	0	0	0	0	0	0	0	0	0	0	0	0	0	0	0	0	0	0	0	0	0	0	0	0	0	0	0	0	NA
ENSG00000178028	4.35894	5.26073	4.65977	4.91808	4.53348	4.79534	3.81476	4.52782	5.21034	4.49333	4.33986	5.09055	3.16828	4.25748	3.72556	4.69858	4.63474	3.29496	5.18673	5.44227	4.12156	5.366	5.21798	4.97397	5.30155	4.39783	5.16437	5.4392	5.36418	5.00564	0.142588
ENSG00000117419	5.10208	4.96244	5.54544	5.25224	5.76046	5.23772	3.75257	5.43126	5.4878	5.08189	5.11348	5.67529	4.40892	5.24148	4.17209	5.14179	4.81334	5.20971	5.78443	5.49224	3.91365	5.81107	5.54028	4.58311	4.95102	4.65002	6.57087	5.50833	5.61056	5.19466	0.221069
ENSG00000233602	0	0	0	0	0	0	0	0	0	0	0	0	0	0	0	0	0	0	0	0.0415968	0	0	0	0	0	0	2.51589	0	0	0	0.99943
ENSG00000252146	0	0	0	0	0	0	0	0	0	0	0	0	0	0	0	0	0	0	0	0	0	0	0	0	0	0	0	0	0	0	NA
ENSG00000199385	0	0	0	0	0	0	0	0	0	0	0	0	0	0	0	0	0	0	0	0	0	0	0	0	0	0	0	0	0	0	NA
ENSG00000187147	3.78555	3.5897	3.96913	4.16818	4.7264	3.94041	3.29784	4.04016	4.42163	4.14105	4.0328	4.35453	2.91836	3.39095	2.59597	3.98754	3.76666	3.43194	4.48623	4.37512	2.83685	4.20827	4.23749	4.21522	4.50756	3.53136	4.51187	4.20618	4.76309	4.19369	0.175639
ENSG00000263381	0	0	0	0	0	0	0	0	0	0	0	0	0	0	0	0	0	0	0	0	0	0	0	0	0	0	0	0	0	0	NA
ENSG00000126106	3.11593	2.93792	2.48175	2.83097	2.25726	3.09089	1.2959	2.08601	2.72814	2.63383	2.04483	2.79047	2.10831	2.94733	4.02731	3.1276	2.19458	1.2631	3.26908	3.29228	1.27428	3.1786	2.58458	3.09681	2.13129	2.44678	4.80227	2.86396	2.99888	2.34502	0.458276
ENSG00000198520	1.00484	1.59693	0	0.433824	2.10083	1.21955	3.07789	0.103496	1.04139	0.704186	0.282058	3.89107	0	0.984947	2.69491	2.97275	0.530002	0	1.93023	3.09965	0	3.23937	1.95152	2.30978	3.27337	0.0702184	4.72242	1.41177	1.90096	0.707403	0.689428
ENSG00000199377	0	0	0	0	0	0	0	0	0	0	0	0.593907	0	0	0	0	0	0	0	0	0	0	0	0	0	0	0	0	0	0	1
ENSG00000200169	0	0	0	0	0	0	0	0	0	0	0	0	0	0	0	0	0	0	0	0	0	0	0	0	0	0	0	0	0	0	NA
ENSG00000142945	0.035852	0.12573	0.744087	0.756356	0	0.176524	4.16497	3.26364	1.13623	1.48493	2.1096	0.597412	0	0	0	1.31175	0.987244	0	0.0271537	0.491267	0	0	0.574701	2.15854	2.56128	1.27451	7.21615	0.921159	0.827101	2.14254	0.866809
ENSG00000225721	0	0	0	0	0	0	0	0	0	0	0	0	0	0	0	0	0	0	0	0	0	0	0	0	0	0	0.966978	0	0	0	1
ENSG00000142937	9.94605	9.61194	9.79043	9.89892	8.03523	10.2187	9.41446	10.3366	10.664	9.61004	9.77022	10.2212	8.01189	8.86228	8.01168	9.54558	9.45929	8.70632	10.0103	11.6818	9.20989	9.3571	9.94941	9.49366	9.86043	9.24163	8.16494	9.59519	10.6367	10.4002	0.185194
ENSG00000200913	1.31662	0.400578	1.42112	1.46743	0	1.61182	0.114959	1.67074	2.5856	0.709723	1.10693	2.01036	0	0.380505	0	2.24675	0.815394	0	2.10575	2.94085	0	1.1506	1.75151	0.696359	1.33871	0.568543	0.714336	1.2349	2.21695	2.4371	0.623927
ENSG00000202031	0	0	0	0	0	0	0	0	0	0	0	0	0	0	0	0	0	0	0	0	0	0	0	0	0	0	0	0	0	0	NA
ENSG00000234093	0	0	0	0	0	0	0	0.0324677	0	0.27563	0	0.00214184	0	0	0	0	0	0	0	0.793373	0	0	0	0.0661644	0	0	0	0	0	0	0.98364
ENSG00000142959	0	1.66676	0.216392	0.0696397	1.66535	0	0	0.646351	1.70352	4.71851	0	4.73328	0	0	0	2.31572	0	0	0	0.634345	0	2.61526	0	3.9933	0.108937	0	1.10307	0.733981	1.31577	0	0.828748
ENSG00000173846	4.79578	3.55508	5.00307	3.48735	2.4402	4.56642	5.27488	4.99385	4.45124	3.49672	4.37457	5.23239	2.87403	3.29983	2.2671	5.42502	3.89465	1.54658	4.69959	4.40343	2.68941	4.43754	3.8563	4.02447	4.39197	3.58038	2.73164	4.56826	4.67172	4.58435	0.274163
ENSG00000188396	0.54408	1.49971	0.719817	0	0	0	0.65126	0.0499017	1.36201	0	0.310946	4.51265	0	0	0	2.45986	0.861873	0	0	0.237814	0	0.773364	0	0.0318104	0	0	0.0755821	1.00422	1.01601	0.0789382	0.91077
ENSG00000222009	3.21657	3.94433	3.77654	2.40304	0.317644	2.80927	1.71841	2.76886	4.45839	2.09217	2.47529	4.4363	1.84883	2.30745	1.07828	3.64941	1.85366	0	3.84262	4.49996	0.562508	4.50898	2.77924	2.35093	2.41803	1.94611	2.32376	4.0813	4.79183	3.60846	0.438151
ENSG00000117425	2.44631	2.13864	2.33682	2.1531	3.22473	2.83259	0	2.12517	2.78721	2.3209	2.08538	3.33653	0	0.839456	0	0.991413	3.26966	0.62472	5.94087	5.72991	0	4.25486	2.62808	1.63392	2.18576	1.55575	5.92176	3.43753	4.0544	3.00091	0.605796
ENSG00000226499	0	0	0	0	0.685678	0.0982341	0	0.404868	0.176973	0	0	0	0	0	0	0	0.129577	0	0.515987	1.49004	0	1.2817	0.388163	0.150989	0.578566	0	0.215816	0.229312	0.338707	0.378665	0.871023
ENSG00000070785	4.59842	4.62209	4.61257	4.16137	3.6625	4.63663	3.16141	4.38631	4.65774	3.98408	4.27936	4.40648	4.05934	3.2495	3.49145	4.14566	4.16111	5.12287	4.90639	4.55974	2.88511	4.25588	4.20432	3.44822	4.06169	3.59126	4.80191	4.13244	4.63644	4.42126	0.191047
ENSG00000266294	0	0	0	0	0	0	0	0	0	0	0	0	0	0	0	0	0	0	0	0	0	0	0	0	0	0	0	0	0	0	NA
ENSG00000253039	0	0	0	0	0	0	0	0	0	0	0	0	0	0	0	0	0	0	0	0	0	0	0	0	0	0	0	0	0	0	NA
ENSG00000229815	0	0	0	0	0	0	0	0	0	0	0	0	0	0	0	0	0	0	0	0	0	0	0	0	0	0	0	0	0	0	NA
ENSG00000232369	0	0	0	0	0	0	0	0	0	0	0	0	0	0	0	0	0	0	0	0	0	0	0	0	0	0	0	0	0	0	NA
ENSG00000268949	0	0	0	0	0	0	0	0	0	0	0	0	0	0	0	0	0	0	0	0	0	0	0	0	0	0	0	0	0	0	NA
ENSG00000126107	5.25225	4.95367	5.09367	5.42569	4.12125	5.29138	4.12728	5.30091	5.26092	5.30966	5.03206	5.01824	3.36249	4.47211	4.56934	4.97409	5.19584	4.59028	5.46976	5.41772	4.61581	4.58187	4.96143	5.82829	5.25053	4.81039	4.82154	5.37363	5.41697	5.26155	0.151982
ENSG00000126088	5.65555	6.65367	5.68712	5.54515	5.21625	5.67717	4.76177	5.42503	5.70467	5.48538	5.5067	5.8122	4.60582	5.19879	5.35298	5.37474	5.16494	4.72184	5.89225	6.06918	3.92986	5.81573	5.52802	5.21524	5.70815	5.02876	6.05135	6.10062	6.13206	5.41273	0.182302
ENSG00000162415	0.891058	4.28203	1.95611	2.67417	2.43825	1.50283	0	0.785698	2.26306	2.36785	2.12629	2.33363	0.0892658	1.51591	0	1.62822	2.27316	0	2.16215	4.05358	1.18384	3.63914	2.38243	2.81775	1.55993	1.53255	2.96295	3.28823	2.74777	1.57221	0.559119
ENSG00000264650	0	0	0	0	0	0	0	0	0	0	0	0	0	0	0	0	0	0	0	0	0	0	0	0	0	0	0	0	0	0	NA
ENSG00000234315	0	0	0	0	0	0	0	0	0	0	0	0	0	0	0	0	0	0	0	0	0	0	0	0	0	0	0	0	0	0	NA
ENSG00000221707	0	0	0	0	0	0	0	0	0	0	0	0	0	0	0	0	0	0	0	0	0	0	0	0	0	0	0	0	0	0	NA
ENSG00000186603	0	0	0	0.319702	1.46523	0	1.6525	1.11092	1.34023	1.6314	0.698796	0.73823	0	0	0	0	0.538084	0	2.17281	0.384323	0	0	0.218266	1.98224	1.68005	1.71971	0	0.471813	0.032278	1.07131	0.729334
ENSG00000132781	3.60202	3.2385	3.73149	4.00499	3.68572	3.92987	3.18214	3.54497	4.59937	3.77081	3.505	4.29013	1.99466	3.57577	2.60919	3.825	3.40686	2.278	4.69308	4.63085	2.53885	4.32898	4.34692	4.04613	4.62744	3.45403	3.51344	4.76486	4.66842	4.18808	0.219786
ENSG00000132773	3.61534	3.36038	3.63928	3.96515	2.73686	3.80154	3.15377	3.61619	4.11853	3.71952	3.51809	4.18076	1.97282	3.06388	2.64741	3.50713	3.58585	1.61862	4.16001	4.21113	2.04033	3.86715	4.21961	3.92518	4.41366	3.45948	5.18668	4.55527	4.28491	3.83818	0.316578
ENSG00000070759	2.62834	1.66938	3.10045	3.52733	2.62898	3.29707	3.29535	3.95657	3.54364	2.59859	2.92561	2.61013	0.714758	1.57683	2.04568	3.04458	3.53332	1.99257	3.8362	4.04395	1.43661	2.27967	4.56669	3.35565	3.23326	2.5661	4.43454	3.00357	3.15813	3.88562	0.366307
ENSG00000238945	0	0	0	0	0	0	0	0	0	0	0	0	0	0	0	0	0	0	0	0	0	0	0	0	0	0	0	0	0	0	NA
ENSG00000236872	0	0	0	0	0	0	0	0	0	0	0	0	0	0	0	0	0	0	0	0	0	0	0	0	0	0	0	0	0	0	NA
ENSG00000236624	1.13927	1.75442	1.59572	1.69175	2.56416	1.6384	1.32271	1.42505	2.52488	1.38081	1.06305	2.37387	1.27235	0.889975	0.391972	1.66799	2.01008	0	2.37555	2.89797	1.97938	3.03091	2.22879	1.83517	2.59176	1.47574	3.19346	2.77864	2.5398	1.72859	0.436685
ENSG00000132763	1.40536	2.39757	0.996598	1.83317	1.60387	1.70155	1.22688	2.1133	1.50435	1.70847	1.3157	1.97038	2.20991	1.6689	3.40314	1.08965	1.87216	1.60446	1.77059	1.91891	1.2086	1.15127	1.60006	1.48782	1.45313	1.5443	3.23869	1.75448	1.71631	1.34111	0.509504
ENSG00000117450	8.2133	8.45647	8.67142	8.65284	8.06239	8.32504	7.54148	8.44485	8.69583	8.16314	9.08918	8.45392	7.8809	8.49351	8.04999	8.68693	8.48926	8.16798	8.51009	8.24994	5.82923	8.08401	8.16667	8.242	8.29552	8.27978	7.58692	9.64003	8.36333	8.82263	0.145201
ENSG00000234379	0	0	0	0	0	0	0	0	0	0	0	0	0	0	0	0	0	0	0	0	0	0	0	0	0	0	0	0	0	0	NA
ENSG00000117448	5.63019	5.51573	5.74061	5.72299	4.52619	5.74531	5.33399	5.66953	6.07339	5.59791	5.86804	5.99506	4.25596	6.38111	6.34983	6.09964	6.2663	4.03709	5.72684	5.9267	5.56234	6.3497	6.01119	6.37355	6.27354	5.98274	4.51917	6.29165	5.98189	5.92986	0.106431
ENSG00000132780	5.58751	4.43785	5.31424	5.40714	4.90962	5.66626	4.95117	5.09666	6.01454	5.28749	5.25332	6.0423	4.18574	4.49982	3.97638	5.66917	5.00081	3.99746	6.01376	6.34421	3.56587	5.22658	5.68014	5.3299	6.0186	4.80813	6.71082	5.70445	6.26398	5.76916	0.218851
ENSG00000159588	1.67978	0.428357	0.999896	1.41202	0.45951	1.86311	2.56397	1.16211	4.0794	1.46538	1.23938	7.66055	0.174794	1.41989	1.73346	5.19405	1.56772	1.59287	2.41171	2.31688	0.181843	1.14168	2.53312	2.1305	3.01586	1.03577	1.96396	2.79821	2.36028	1.85738	0.762406
ENSG00000159592	5.0287	4.52993	5.19358	5.30975	4.17774	5.19744	4.87232	5.42662	5.5343	5.25417	5.24702	5.36202	3.94392	4.58467	4.38166	5.47984	5.21463	4.24711	5.41517	5.38007	4.05067	5.00937	5.33381	5.33389	5.38042	4.89425	5.89077	5.67194	5.75603	5.59028	0.140671
ENSG00000225447	0.625902	0	0.487602	1.04963	0	1.11563	0	1.39268	1.51872	0.472278	0.635388	1.01628	0	0	0	1.27722	1.39718	0	1.45066	1.87869	0	0.487928	1.18122	0.419762	0.473931	0.0646044	1.03472	1.39783	1.85144	1.89127	0.612935
ENSG00000234329	0.828009	0	0.560086	0.899373	0	1.21541	0.202659	1.58006	1.39307	0.36826	0.528854	0.916302	0	0	0	1.34229	1.25957	0	1.38818	1.78523	0	0.767791	0.991041	0.692165	0.787943	0.121774	1.10172	1.36063	1.89359	1.77868	0.601759
ENSG00000159596	4.18619	4.43583	4.02979	4.74367	3.61138	4.36766	4.41296	4.59113	4.61267	4.16201	4.37177	4.39917	3.54977	3.71588	3.11582	4.02584	4.33026	3.5616	4.30874	4.88883	3.25226	4.13038	4.47154	4.17641	4.57265	3.83053	4.31657	4.5809	4.60983	4.6641	0.145573
ENSG00000197429	2.22723	2.36664	2.56048	2.9784	1.80198	2.37568	1.71764	2.81992	2.78256	2.3305	2.37831	2.82436	1.48912	1.53858	1.05887	2.01297	2.33304	2.6736	3.05044	2.96506	1.32544	2.35561	2.44425	2.12746	1.61466	2.03907	3.71057	2.84166	2.90945	2.53254	0.382236
ENSG00000230896	1.68063	2.08349	1.66537	2.21867	1.84328	1.85501	0.750305	2.19179	2.13264	1.91007	1.90512	2.29085	0.902501	1.52271	1.34925	1.53223	2.00031	1.75766	2.66539	2.64423	1.07646	2.90454	2.56218	1.80053	1.8058	1.63348	1.87754	2.78032	2.51304	2.16213	0.345697
ENSG00000236111	0	0	0	0	0	0	0	0	0	0	0	0	0	0	0	0	0	0	0	0	0	0	0	0	0	0	0	0	0	0	NA
ENSG00000086015	4.58292	3.7291	5.52265	6.27189	4.01933	4.9214	2.76936	4.54545	6.12248	5.59565	5.63785	5.66355	5.1223	3.56301	3.39154	4.90186	4.55238	6.69998	5.75711	6.52166	2.40327	5.39638	6.01308	5.31961	3.40617	4.80944	6.69152	4.64291	6.52421	5.68767	0.258434
ENSG00000232467	0	0	0	0	0	0	0	0	0	0	0	0	0	0	0	0	0	0	0	0	0	0	0	0	0	0	0	0	0	0	NA
ENSG00000117461	5.33204	3.73076	3.44394	4.0805	4.25371	5.25588	1.80319	2.50039	3.76619	3.24603	3.60139	4.19934	3.75512	2.9467	0.408194	4.93736	3.95861	2.92302	4.37406	2.72784	1.38903	3.67315	4.24316	3.41344	3.80676	3.41124	5.39318	4.62842	4.67299	3.40278	0.335781
ENSG00000226957	0	0	0	0	0	0	0	0	0	0	0	0	0	0	0	0	0	0	0	0	0	0	0	0	0	0	0	0	0	0	NA
ENSG00000233114	0	0	0	0	0	0	0	0	0	0	0	0	0	0	0	0	0	0	0	0	0	0	0	0	0	0	0	0	0	0	NA
ENSG00000227857	0	0.2912	0	0	0	0	0	0	0	0	0	0	0	0	0	0	0	0	0	0	0	0.763816	0	0	0	0	2.55763	0	0	0	0.985776
ENSG00000117472	1.33214	2.98605	1.3486	7.5155	1.45531	2.63717	0	1.62195	5.41926	7.79445	2.2041	6.09062	0	7.86166	1.81994	5.72841	6.76227	0.00421684	2.15681	0	1.23032	4.85607	7.44459	7.02777	0.845217	6.60412	5.72242	6.94543	1.94395	3.97334	0.546161
ENSG00000250719	0	0	0	0	0	0	0	0	0	0	0	0	0	0	0	0	0	0	0	0	0	0	0	0	0	0	6.45096	0	0	0	1
ENSG00000085998	4.39672	5.13315	4.99111	5.12951	4.90662	4.69761	2.7561	4.63142	5.27477	4.5604	4.53746	5.09984	4.84562	4.73063	4.18736	4.81398	4.55407	4.98719	5.63856	5.11451	3.75891	5.90841	5.68765	4.41341	4.82806	4.64025	5.73451	5.9008	5.43327	4.93255	0.181086
ENSG00000171357	1.57401	2.04114	3.3989	2.79233	2.56537	1.87855	0	1.54088	3.13397	1.85685	2.16113	2.46235	1.64931	2.36026	0	1.5607	1.75309	0	3.75106	2.80437	0	2.07383	3.08606	0.914614	1.19603	1.66662	3.50331	4.23489	3.01237	2.87326	0.530905
ENSG00000085999	0	0	0	0	1.35208	0	3.15392	1.69492	0.711631	0.890895	1.52257	0	0	0.489735	0	1.09927	0.462192	0	0.802837	0.129284	0	0.112405	0.905762	1.54433	1.95725	0.568803	4.75684	1.70615	0	1.61789	0.849785
ENSG00000132128	4.91718	4.84575	5.17066	5.45982	4.05771	5.02818	4.06703	5.22303	5.56041	4.85091	4.9873	5.69631	3.68508	4.29779	3.58592	5.07857	4.81975	4.21206	5.34145	5.63912	3.8151	5.41559	5.40521	4.54187	4.69964	4.52672	5.33265	5.46281	5.65718	5.23477	0.146942
ENSG00000173660	7.03113	6.33693	6.93767	7.13396	7.27059	6.98267	6.92995	7.191	7.09525	7.27237	7.15589	6.65386	7.97044	7.04989	5.68385	6.70507	6.89004	7.2207	6.48013	7.19788	5.46098	6.93933	6.9454	6.916	6.72913	6.85401	6.01124	6.78107	6.8735	7.19248	0.143724
ENSG00000117481	2.72555	3.16165	2.68301	3.05015	1.77362	2.85004	2.45113	2.73129	2.98543	2.41973	2.5653	2.91582	1.50795	2.31709	1.52797	2.89541	2.66341	2.01914	2.91812	3.12775	1.60733	2.92935	3.0452	2.39824	2.72991	2.28861	6.25766	3.19467	2.99237	2.8926	0.584686
ENSG00000225779	0	0	0	0	0	0	0	0	0	0	0	0	0	0	0	0	0	0	0	0	0	0	0	0	0	0	0	0	0	0	NA
ENSG00000117480	3.60574	4.66792	3.27085	4.67379	5.03735	4.5629	2.10134	3.88521	4.22155	4.54792	3.65524	4.2813	1.98367	4.91095	4.84205	4.35064	5.00054	2.87643	5.50893	3.51028	4.38324	5.53759	6.73938	5.06539	3.14049	4.73225	6.67697	6.81389	3.78165	4.40572	0.362573
ENSG00000232022	0	0	0	0	0.850163	0	0	0	0	0	0	0.969812	0	0.534037	0	0	0	0	1.65222	0	0	0.940623	1.99612	0	0	0	1.21744	3.2042	0	0	0.91218
ENSG00000224863	0	0	0	0	0	0	0	0	0	0	0	0	0	0	0	0	0	0	0	0	0	0	0	0	0	0	1.69336	0	0	0	1
ENSG00000225667	0	0.436467	0	0	0.00410721	0.112223	0	0	0	0	0	0	0	0	0	0	0	0	0	0	0	0	0	0	0	0	1.79862	0	0	0	0.989402
ENSG00000197587	0	0	0	0	0	0	0	0	0	0	0	0	0	0	0	0	0	0	0	0	0	0.594007	0	0	0	0	1.42917	0	0	0	0.985668
ENSG00000269956	0	0	0	0	0	0	1.61204	0	0	0	0	1.16914	0	0	0	0.893203	0	0	0.515423	0.15162	1.19507	0	0	0	0.45608	0	2.4211	0	0	0	0.91465
ENSG00000162456	0	0	0	0	0	0	0	0	0	0	0	0	0	0	0	0	0	0	0	0	0	0.0173912	0	0	0	0	1.72008	0	0	0	0.999651
ENSG00000079277	5.18432	4.46949	5.11794	4.9352	3.98969	4.89986	6.68934	4.34374	4.98492	5.09035	4.79087	5.14574	3.79875	4.04955	3.63658	5.63864	4.33821	3.95073	5.45896	5.06867	6.12239	4.91639	4.96925	4.95241	6.23112	4.53784	4.37844	4.80529	5.11017	5.00237	0.27874
ENSG00000142961	4.14363	3.20646	4.06413	4.06636	2.78967	3.9003	3.81803	2.96991	3.96859	3.86212	4.03249	4.06042	2.83821	3.12622	2.09932	4.42361	3.61884	3.47288	4.06358	4.32843	3.92383	4.04251	4.2954	3.78391	4.39331	3.56169	3.04255	4.17099	4.20189	4.17836	0.157934
ENSG00000123472	4.49304	5.66591	4.73635	4.53237	5.57248	4.38515	3.62429	4.18354	4.37561	4.70273	4.70868	4.56994	5.42583	4.57781	4.15849	4.10086	4.26525	5.61768	4.34912	4.61301	3.45161	5.3329	4.35657	4.15279	4.07837	4.55038	5.32932	4.68186	4.4996	4.17103	0.199102
ENSG00000233647	0	0	0	0	0	0	0	0	0	0	0	0	0	0	0	0	0	0	0	0	0	0	0	0	0	0	0	0	0	0	NA
ENSG00000186118	0	0	0	0	0	0	0	0	0	0	0	0	0	0	0	0	0	0	0	0	0	0	0	0	0	0	8.64444	0	0	0	1
ENSG00000228237	0	0	0	0	0	0	0	0	0	0	0	0	0	0	0	0	0	0	0	0	0	0	0	0	0	0	2.98967	0	0	0	1
ENSG00000159658	5.93717	5.09525	6.20042	6.26274	5.1214	5.89678	4.75443	5.61738	6.05585	5.54665	5.6819	5.88958	4.33415	5.03941	3.93107	5.90782	5.46528	4.81708	6.03889	5.77533	3.98397	5.19667	5.53988	5.39084	5.37404	5.81059	5.31386	5.98156	6.09975	5.83252	0.132089
ENSG00000236476	0	0	0	0	0	0	0	0	0	0	0	0	0	0	0	0	0	0	0	0	0	0	0	0	0	0	0	0	0	0	NA
ENSG00000142973	6.6248	2.0369	5.19327	7.67489	0	6.29063	0	5.18984	4.44097	4.08661	5.48822	5.8589	3.48134	1.02229	0	7.47708	4.42166	3.84243	7.93396	1.86099	1.05213	3.75462	5.11166	4.08166	0	3.61071	0.327589	5.17439	3.61161	5.34637	0.534686
ENSG00000154198	0	0	0	0.252673	0	1.96642	0	0	0	0	0	0	0	0	0	0	0	0	0	0	0	0	0	0	0	0	0	0	0	0	0.995569
ENSG00000238145	0	0	0	0	0	0	0	0	0	0	0	0	0	0	0	0	0	0	0	0	0	0	0	0	0	0	0	0	0	0	NA
ENSG00000187048	0	0	0	0	0	0	0	0	0	0	0	0	0	6.43523	8.03765	0	0	0	0	0	0	0	0	0	0	0	0	0	0	0	0.972392
ENSG00000186377	3.99978	0.597853	5.19364	2.6039	3.09208	4.28739	0	2.83026	3.93049	0.972283	3.3977	3.41526	2.11618	1.72074	0.975178	3.78591	5.38197	1.66751	5.02953	1.06411	0.202449	2.67253	3.88111	1.04377	0	4.57814	2.6833	3.31008	2.33089	3.65242	0.519248
ENSG00000259832	0	0	0	0	0	0	0	0	0	0	0	0	0	0	0	0	0	0	0	0	0	0	0	0	0	0	0	0	0	0	NA
ENSG00000261196	0	0	0	0	0	0	0	0	0	0	0	0	0	0	0	0	0	0	0	0	0	0	0	0	0	0	0	0	0	0	NA
ENSG00000261593	0	0	0	0	0	0	0	0	0	0	0	0	0	0	0	0	0	0	0	0	0	0	0	0	0	0	0	0	0	0	NA
ENSG00000261290	0	0	0	0	0	0	0	0	0	0	0	0	0	0	0	0	0	0	0	0	0	0	0	0	0	0	0	0	0	0	NA
ENSG00000186160	1.77436	0	0.658824	0.480152	0	3.72926	0	0.337564	0	0	0.249444	0.938216	0	0	0	1.73658	0.476913	0	2.97002	0	0	0.140568	1.28119	0	0	0	0.194411	0.199735	0	0	0.894238
ENSG00000225154	0	0	0	0	0	0	0	0	0	0	0	0	0	0	0	0	0	0	0	0	0	0	0	0	0	0	0	0	0	0	NA
ENSG00000225506	0	0	0	0	0	0	0	0	0	0	0	0	0	0.530716	0	0	0	0	0	0	0	0	0	0	0	0	0	0	0	0	1
ENSG00000162365	0	0	0	0	0	0	0	0	0	0	0	0	0	4.3381	6.7242	0	0	0	0.0712877	0	0	0	0	0	0	0	0	0	0	0	0.977388
ENSG00000225514	0	0	0	0	0	0	0	0	0	0	0	0	0	0	0	0	0	0	0	0	0	0	0	0	0	0	0	0	0	0	NA
ENSG00000224805	0	0	0	0	0	0.164234	0.540947	0	0	0	0	0	0	2.30256	0	0.316757	0.260175	0	0.57361	0	0	0	0	0	0	0	0.579165	0.224991	0	0	0.960166
ENSG00000162366	3.32494	2.881	1.94523	0.295147	0	4.0671	5.48327	6.48749	4.52847	4.27159	6.08214	3.7893	0	9.09784	1.97782	5.05198	7.64881	0	0	0	5.20262	0.260033	3.61342	5.84065	2.03711	5.6155	0.599574	1.03839	0	5.97248	0.666408
ENSG00000162367	3.62803	1.68981	1.67999	2.01828	1.25682	3.55571	2.67696	1.13536	2.719	1.86375	2.13916	3.08758	1.62184	2.23676	0.33423	4.79735	0.966631	0.338842	2.37099	1.44827	0	1.88618	2.14714	2.32606	3.75622	1.38293	1.39273	3.70405	3.25864	2.51843	0.574906
ENSG00000226252	0.952958	0	0	0	0	0.741095	0	0	0.27687	0	0	0.251169	0	0.26235	0	2.42771	0	0	0	0	0	0.0165369	0.184966	0	1.2048	0	0.770445	1.22754	1.13313	0.351927	0.895264
ENSG00000123473	0	0	0	0.311503	0	0.31358	2.45055	1.77949	0.0492886	0.982839	0.85565	0	0	0	0	0.593591	1.36613	0	0	0.0868328	0	0	0.705208	1.63243	1.44835	0.434172	3.27239	0.0972498	0	0.962349	0.851746
ENSG00000162368	6.80468	5.45266	7.2909	6.76497	5.65572	6.65297	5.52707	6.37958	6.77875	6.41121	6.67488	5.85018	5.08972	5.50465	6.40427	6.54514	7.01814	5.63348	6.72755	5.81226	5.4608	5.84145	6.64387	6.45789	5.79154	6.04029	4.43818	6.71747	5.98755	6.77523	0.158885
ENSG00000225762	0	0	0	0	0	0	0	0	0	0.681183	0	0	0	0	0	0	0	0	1.15049	0	0	0	0	0	0	0	2.66434	0	0	0	0.976294
ENSG00000186790	0	0	0	0	0	0	0	0	0	0	0	0	0	0	0	0	0	0	0.486204	0	0	0	0	0	0	0	1.15379	0	0	0	0.985469
ENSG00000237424	1.30728	0.897479	3.92177	0.633867	0	1.29957	1.50471	1.22253	2.73549	2.56552	0.363431	1.12603	0	1.51398	1.01175	2.03347	0.293176	0	4.49047	0.354761	0	1.75682	2.77336	1.47302	2.20332	0	0.850434	1.12342	1.83582	1.83719	0.718652
ENSG00000186564	0	0.0990599	2.39965	0	0	0	0	0	1.22916	1.97193	0	0	0	1.2352	0	0	0	0	4.18567	0	0	1.31495	1.63111	0	0.485321	0	0.256546	0	0	0.392931	0.909248
ENSG00000271355	0	0	0	0	0	0	0	0	0	0	0	0	0	0	0	0	0	0	0	0	0	0	0	0	0	0	0	0	0	0	NA
ENSG00000229554	0	0	0	0	0	0	0	0	0	0	0	0	0	0	0	0	0	0	0	0	0	0	0	0	0	0	0	0	0	0	NA
ENSG00000221346	0	0	0	0	0	0	0	0	0	0	0	0	0	0	0	0	0	0	0	0	0	0	0	0	0	0	0	0	0	0	NA
ENSG00000227883	0	0	0	0	0	0	0	0	0	0	0	0	0	0	0	0	0	0	0	0	0	0	0	0	0	0	0	0	0	0	NA
ENSG00000221447	0	0	0	0	0	0	0	0	0	0	0	0	0	0	0	0	0	0	0	0	0	0	0	0	0	0	0	0	0	0	NA
ENSG00000227947	0	0	0	0	0	0	0	0	0	0	0	0	0	0	0	0	0	0	0.731123	0	0	0	0	0	0	0	0	0	0	0	1
ENSG00000269113	2.21017	0.556364	5.12324	2.51622	0	2.62969	0	1.13034	2.88559	2.1165	2.46144	2.32637	2.02297	4.24093	1.68261	1.98835	1.50639	0	3.34607	0.961741	1.10569	1.74291	2.90788	1.52599	1.29088	1.3462	1.3188	1.31232	1.6072	2.57703	0.654605
ENSG00000225028	0	0	2.36202	0	0	0	0	0	0	0	0	0	0	0	0	0	0	0	0	0	0	0	0	0	0	0	2.24021	0	0	0	0.967296
ENSG00000226133	0	0	0	0	0	0	0	0	0	0	0	0	0	0	0	0	0	0	0	0	0	0	0	0	0	0	0.495656	0	0	0	1
ENSG00000231413	0	0	0	0	0	0	0	0	0	0	0	0	0	0	0	0	0	0	0	0	0	0	0	0	0	0	0	0	0	0	NA
ENSG00000237180	0	0	0	0	0	0	0	0	0	0	0	0	0	0	0	0	0	0	0	0	0	0	0	0	0	0	0	0	0	0	NA
ENSG00000242267	0	0	0	0.0732344	0	0	0	0	0.258075	0	0	0.233432	0	0	0	0.0606961	0	0	0.653486	1.08995	0	0.946581	0.666833	0	0	0	0.28657	0.054396	0	0.59047	0.879028
ENSG00000269709	0	0	0	0	0	0	0	0	0	0	0	0	0	0	0	0	0	0	0	0	0	0	0	0	0	0	0	0	0	0	NA
ENSG00000223720	0	0	0	0	0	0	0	0	0	0	0	0	0	0	0	0	0	0	0	0	0	0	0	0	0	0	0	0	0	0	NA
ENSG00000117834	0	0	0	0.214973	0	0.0115356	1.30347	1.53779	0.76572	1.12484	0.0980894	1.14659	0	3.19948	3.08078	3.26105	0	0	1.57528	0.278749	1.99669	0.0626947	0.0482481	5.98362	0.762922	0.864907	2.09287	0.707767	0.415	0.789935	0.853973
ENSG00000272491	1.19085	1.43778	0.98518	1.29926	0	1.30928	0	0.575442	2.3578	1.09957	1.03808	1.93933	0.0492945	0.882906	0	1.81557	0.866449	0	2.74969	2.06733	0	2.69744	1.82796	1.90483	2.18511	0.645083	0.436951	1.90154	1.889	1.97022	0.568952
ENSG00000132122	3.09331	3.13438	2.8577	3.50546	2.09486	3.29516	0.329947	2.48264	3.64104	2.71283	2.50396	4.09598	1.26761	2.18308	0	3.07315	2.66049	0.249757	4.75826	4.08653	1.21676	3.84772	3.17089	2.18938	2.45663	2.28223	6.21863	3.59387	3.5811	3.48671	0.568308
ENSG00000224986	0	0	0	0	0	0	0	0	0	0	0	0	0	0	0	0	0	0	0	0	0	0.437095	0	0	0	0	0.058274	0	0	0	0.995403
ENSG00000206700	0	0	0	0	0	0	0	0	0	0	0	0	0	0	0	0	0	0	0	0	0	0	0	0	0	0	0	0	0	0	NA
ENSG00000235105	0	0	0	0	0	0	0	0	0	0	0	0	0	0	0	0	0	0	0	0	0	0	0	0	0	0	0	0	0	0	NA
ENSG00000223175	0	0	0	0	0	0	0	0	0	0	0	0	0	0	0	0	0	0	0	0	0	0	0	0	0	0	0	0	0	0	NA
ENSG00000232514	0	0	0	0	0	0	0	0	0	0	0	0	0	0	0	0	0	0	0	0	0	0	0	0	0	0	0	0	0	0	NA
ENSG00000186094	0	0	0	0	0.13264	0	0	0	0	0	0	0	0	0	0	0	0	0	0	0	0	0.787399	0	0	0	0	0	0	0	0	0.994191
ENSG00000162373	2.69081	2.73856	3.45003	3.87898	3.3338	3.24681	0.49762	1.55626	3.79834	3.60711	2.62687	3.77552	1.53047	3.27854	0	2.47961	2.16191	1.60545	2.84021	4.60374	1.36508	4.27324	3.22379	2.88563	3.89858	2.5346	2.80589	3.53766	3.77154	3.38362	0.39497
ENSG00000229846	0	0	0	0	0	0	0	0	0	0	0	0	0	0	0	0	0	0	0	0	0	0	0	0	0	0	0	0	0	0	NA
ENSG00000239144	0	0	0	0	0	0	0	0	0	0	0	0	0	0	0	0	0	0	0	0	0	0	0	0	0	0	0	0	0	0	NA
ENSG00000230114	0	0	0	0	0	0	0	0	0	0	0	0	0	0	0	0	0	0	0	0	0	0	0	0	0	0	0	0	0	0	NA
ENSG00000225623	0	0	0	0	0	0	0	0	0	0	0	0	0	0	0	0	0	0	0	0	0	0	0	0	0	0	0	0	0	0	NA
ENSG00000237478	0	0	0	0	0	0	0	0	0	0	0	0	0	0	0	0	0	0	0	0	0	0	0	0	0	0	0	0	0	0	NA
ENSG00000215887	0	0	0	0	0	0	0	0	0	0	0	0	0	0	0	0	0	0	0	0	0	0	0	0	0	0	0	0	0	0	NA
ENSG00000221746	0	0	0	0	0	0	0	0	0	0	0	0	0	0	0	0	0	0	0	0	0	0	0	0	0	0	0	0	0	0	NA
ENSG00000227839	0	0	0	0	0	0	0	0	0	0	0	0	0	0	0	0	0	0	0	0	0	0	0	0	0	0	0	0	0	0	NA
ENSG00000233595	0	0	0	0	0	0	0	0	0	0	0	0	0	0	0	0	0	0	0	0	0	0	0	0	0	0	0	0	0	0	NA
ENSG00000162374	0	0.284606	0	0	3.48243	0	0	0	0	0.587437	0	0	0	0	0	0	0	0	0	0	0	2.51421	0	0	0	0	2.78249	0	0	0	0.938918
ENSG00000230828	0	0	0	0	0	0	0	0	0	0	0	0	0	0	0	0	0	0	0	0	0	0	0	0	0	0	0	0	0	0	NA
ENSG00000237337	0	0	0	0	0	0	0	0	0	0	0	0	0	0	0	0	0	0	0	0	0	0	0	0	0	0	0	0	0	0	NA
ENSG00000233407	0	0	0	0	0	0	0	0	0	0	0	0	0	0	0	0	0	0	0	0	0	0	0	0	0	0	0.276794	0	0	0	1
ENSG00000234080	0	0	0	0	0	0	0	0	0	0	0	0	0	0	0	0	0	0	0	0	0	0	0	0	0	0	0	0	0	0	NA
ENSG00000229316	0	0	0	0	0	0	0	0	0	0	0	0	0	0	0	0	0	0	0	0	0	0	0	0	0	0	0	0	0	0	NA
ENSG00000225671	0	0	0	0	0	0	0	0	0	0	0	0	0	0	0	0	0	0	0	0	0	0	0	0	0	0	0	0	0	0	NA
ENSG00000142700	0	0	0	0	0	0	0	0	0	0	0	0	0	0	0	0	0	0	0	0	0	2.04639	0	0	0	0	2.16242	0	0	0	0.967367
ENSG00000271782	0	0	0.972727	1.03864	2.41971	0.262397	0	0.478438	0.73397	1.57535	1.58061	1.18478	0	0.15284	0	0.301429	0.14456	0	0.43645	1.4314	0	2.01699	1.40523	0.852506	0.611134	0.485771	0.00266457	1.10067	1.11538	0.692533	0.735271
ENSG00000185104	4.17306	3.74507	4.71072	4.74152	3.6563	4.36428	3.62935	4.62385	4.63163	4.31635	4.48783	4.43134	3.83124	3.59239	3.03093	4.14939	4.10947	5.07355	4.47181	4.61455	3.41693	4.32061	4.24111	3.9169	3.72201	3.85382	5.81338	4.49904	4.6122	4.4081	0.280048
ENSG00000225767	0	0	0	0	0	0	0	0	0	0	0	0	0	0	0	0	0	0	0	0	0	0	0	0	0	0	3.03892	0	0	0	1
ENSG00000202140	0	0	0	0	0	0	0	0	0	0	0	0	0	0	0	0	0	0	0	0	0	0	0	0	0	0	0	0	0	0	NA
ENSG00000207194	0	0	0	0	0	0	0	0	0	0	0	0	0	0	0	0	0	0	0	0	0	0	0	0	0	0	0	0	0	0	NA
ENSG00000252825	0	0	0	0	0	0	0	0	0	0	0	0	0	0	0	0	0	0	0	0	0	0	0	0	0	0	0	0	0	0	NA
ENSG00000230585	0	0	0	0	0	0	0	0	0	0	0	0	0	0	0	0	0	0	0	0	0	0	0	0	0	0	0	0	0	0	NA
ENSG00000237130	0	0	0	0	0	0	0	0	0	0	0	0	0	0	0	0	0	0	0	0	0	0	0	0	0	0	0	0	0	0	NA
ENSG00000123080	4.81074	3.65464	4.74425	3.77477	2.18635	4.60335	3.51363	3.87839	4.18154	3.76355	3.8885	3.77116	2.54716	2.20207	0.728821	3.34119	2.63675	2.19752	3.86273	4.57297	2.20238	3.09243	3.33644	3.31945	3.18924	2.42119	2.70193	3.12595	4.41538	4.07132	0.312421
ENSG00000265538	0	0	0	0	0	0	0	0	0	0	0	0	0	0	0	0	0	0	0	0	0	0	0	0	0	0	0	0	0	0	NA
ENSG00000204006	0	0	0	0	0	0	0	0	0	0	0	0	0	0	0	0	0	0	0	0	0	0	0	0	0	0	5.12348	0	0	0	1
ENSG00000200262	0	0	0	0	0	0	0	0	0	0	0	0	0	0	0	0	0	0	0	0	0	0	0	0	0	0	0	0	0	0	NA
ENSG00000213478	0	0	0	0	0	0	0	0	0	0	0	0	0	0	0	0	0	0	0	0	0	0	0	0	0	0	0.888325	0	0	0	1
ENSG00000239101	0	0	0	0	0	0	0	0	0	0	0	0	0	0	0	0	0	0	0	0	0	0	0	0	0	0	0	0	0	0	NA
ENSG00000221492	0	0	0	0	0	0	0	0	0	0	0	0	0	0	0	0	0	0	0	0	0	0	0	0	0	0	0	0	0	0	NA
ENSG00000203356	0	0	0	0	0	0	0	0	0	0	0	0	0	0	0	0	0	0	0	0	0	0	0	0	0	0	0	0	0	0	NA
ENSG00000238618	0	0	0	0	0	0	0	0	0	0	0	0	0	0	0	0	0	0	0	0	0	0	0	0	0	0	0	0	0	0	NA
ENSG00000123091	6.49909	6.10585	7.27332	6.703	6.95787	6.4059	4.89528	6.03712	6.84138	6.18043	6.44535	6.40922	5.35662	5.62393	5.03491	6.43061	6.0605	6.18738	6.31511	7.12489	4.29658	6.75807	6.32075	5.53513	5.40882	5.69124	5.976	6.61847	6.6363	6.65459	0.158424
ENSG00000233406	0	0	0	0	0	0	0	0.0948995	0	0	0	0	0	0	0	0	0	0	0	0.393532	0	0	0	0	0	0	0	0	0	0	0.991685
ENSG00000236434	0	0	0	0	0	0	0	0	0	0	0	0	0	0	0	0	0	0	0	0	0	0	0	0	0	0	0	0	0	0	NA
ENSG00000085831	0	1.6371	0	2.39073	0.0615119	2.88412	0	1.36089	1.56573	1.6079	1.53584	1.09809	0.99737	2.79454	0	2.08319	2.15444	0	0	0	1.3446	2.43963	2.96459	1.54889	0	2.23656	5.08451	1.84915	0	2.26625	0.750282
ENSG00000261664	0	0	0	0	0	0.709859	0	0	0	0	0	0.988661	0	0	0	0	0	0	0	0	0	0.118845	0.568009	0	0	0	0	0	0	0	0.951285
ENSG00000085832	5.3968	5.33806	5.57482	5.08437	5.36674	5.24127	4.97742	5.16386	5.47812	4.82385	4.70609	5.24749	3.94749	4.14125	3.31037	5.4085	4.5318	4.73175	5.76891	5.37003	3.17813	4.85194	5.10204	4.74352	5.28186	4.38583	5.5588	5.27205	5.60687	5.38954	0.143981
ENSG00000232027	0	0	0	0	0	0	0	0	0	0	0	0	0	0	0	0	0	0	0	0	0	0	0	0	0	0	0	0	0	0	NA
ENSG00000206595	0	0	0	0	0	0	0	0	0	0	0	0	0	0	0	0	0	0	0	0	0	0	0	0	0	0	0	0	0	0	NA
ENSG00000238140	0	0	0	0	0	0	0	0	0	0	0	0	0	0	0	0	0	0	0	0	0	0	0	0	0	0	0	0	0	0	NA
ENSG00000227070	0	0	0	0	0	0	0.137309	0	0	0.368452	0	0	0	0	0.610294	0	0	0.257555	0	0	0	0.0551968	0.949389	1.75527	0	0	0.0729007	0	0	0	0.951848
ENSG00000252032	0	0	0	0	0	0	0	0	0	0	0	0	0	0	0	0	0	0	0	0	0	0	0	0	0	0	0	0	0	0	NA
ENSG00000227742	0	1.73315	0	0	0	0	0	0	0	0	0	0	0	0	0	0	0	0	0	0	0	0	0	0	0	0	1.45079	0	0	0	0.971135
ENSG00000117859	5.41638	5.38664	6.26871	5.64113	4.11528	5.71588	5.39891	4.96983	5.95966	4.9518	4.89148	5.64517	4.39673	4.98118	4.87273	5.81404	4.98166	5.36993	6.25933	6.08167	4.14937	5.0139	5.70894	4.97802	5.34747	5.12499	5.73671	5.74926	6.0766	5.72281	0.150365
ENSG00000236973	0	0	0	0	0	0	0	0	0	0	0	0	0	0	0	0	0	0	0	0	0	0	0	0	0	0	0	0	0	0	NA
ENSG00000232846	0	0	0	0	0	0	0	0	0	0	0	0	0	0	0	0	0	0	0	0	0	0	0	0	0	0	0	0	0	0	NA
ENSG00000212624	0	0	0	0	0	0	0	0	0	0	0	0	0	0	0	0	0	0	0	0	0	0	0	0	0	0	0	0	0	0	NA
ENSG00000078618	5.74048	5.60405	5.81084	5.86695	5.12736	5.70902	6.44327	6.32619	6.06182	5.62705	5.61316	5.99871	5.03629	4.97025	5.21089	6.05387	5.38124	7.19675	6.3873	6.04687	4.63873	6.16464	5.93422	5.47758	6.22484	5.26435	7.16608	5.90418	6.03322	5.85493	0.19658
ENSG00000266993	1.78309	1.35109	1.99702	1.98686	0.966491	2.05959	1.4454	2.06999	1.90689	1.6693	1.50573	2.13408	0.164885	1.03312	0.80289	2.351	1.74016	1.91657	2.51827	2.34667	0.694089	1.82857	2.17898	2.01027	2.26691	1.46117	1.70054	2.3792	2.33023	2.20623	0.311419
ENSG00000272175	0	0	0	0	0	0	0	0	0	0	0	0.285444	0	0	0	0.0842558	0	0	0	0	0	0	0	0	0.0850217	0	0	0	0	0	0.979551
ENSG00000212076	0	0	0	0	0	0	0	0	0	0	0	0	0	0	0	0	0	0	0	0	0	0	0	0	0	0	0	0	0	0	NA
ENSG00000230604	0	0	0	0	0	0	0	0	0	0	0	0	0	0	0	0	0	0	0	0	0	0	0	0	0	0	0	0	0	0	NA
ENSG00000212174	0	0	0	0	0	0	0	0	0	0	0	0	0	0	0	0	0	0	0	0	0	0	0	0	0	0	0	0	0	0	NA
ENSG00000265769	0	0	0	0	0	0	0	0	0	0	0	0	0	0	0	0	0	0	0	0	0	0	0	0	0	0	0	0	0	0	NA
ENSG00000169213	0	0.52906	0	0	2.07558	0	0	2.00115	0	0.830946	0	0	0	0	0	0	0	0	0	1.643	0	4.57539	3.47041	0	0	0	0	0	0	0	0.920488
ENSG00000200839	0	0	0	0	0	0	0	0	0	0	0	0	0	0	0	0	0	0	0	0	0	0	0	0	0	0	0	0	0	0	NA
ENSG00000229032	0	0	0	0	0	0	0	0	0	0	0	0	0	0	0	0	0	0	0	0	0	0	0	0	0	0	0	0	0	0	NA
ENSG00000264613	0	0	0	0	0	0	0	0	0	0	0	0	0	0	0	0	0	0	0	0	0	0	0	0	0	0	0	0	0	0	NA
ENSG00000117862	5.12509	4.88717	4.93883	4.90422	4.2677	5.12723	5.05636	5.20556	5.10594	4.61356	4.43712	5.18903	3.67189	4.33713	4.15563	5.274	5.0057	3.27955	5.34927	5.3849	4.35652	5.14146	4.83038	4.74859	5.08172	4.73393	5.06161	5.29591	5.08901	4.83532	0.109225
ENSG00000198841	3.69846	4.06004	3.70016	3.79466	2.7806	3.60704	3.7407	3.9562	3.33433	3.4783	3.53674	4.37564	1.95403	2.77939	2.54932	3.38401	2.84166	2.01184	3.45118	4.26585	2.4732	3.85857	3.29203	3.7928	4.17238	3.44896	4.2365	3.39922	3.812	3.15054	0.22328
ENSG00000223390	0	0	0	0	0	0	0	0	0	0	0	0	0	0	0	0	0	0	0	0	0	0	0	0	0	0	0	0	0	0	NA
ENSG00000228369	0	0	0	0	0	0	0	0	0	0	0	0	0	0	0	0	0	0	0	0	0	0	0	0	0	0	0.694758	0	0	0	1
ENSG00000134717	4.1217	4.30032	4.04416	4.16474	3.82076	4.09277	3.12627	4.43403	4.31549	3.58749	3.82842	4.34422	2.75542	3.11026	2.49687	3.84937	3.77119	4.01299	4.18928	4.72669	2.91836	4.28806	3.83348	3.23402	3.69883	3.42993	4.12505	4.03988	4.19648	4.14306	0.195522
ENSG00000157077	3.75959	3.49379	3.90488	4.38738	4.31304	3.82183	0	4.15607	4.42504	3.53579	3.95258	4.18019	2.46241	2.96106	2.0124	3.75595	3.52386	4.20141	4.30685	4.55433	2.87873	4.00287	3.76878	2.93515	2.1395	3.23971	4.45123	4.30229	4.55362	4.05286	0.216519
ENSG00000241745	0	0	0	0	0	0	0	0	0	0	0	0	0	0	0	0	0	0	0	0	0	0	0	0	0	0	0	0	0	0	NA
ENSG00000228407	0.488526	0	0.476781	1.21368	0	0.519319	0	1.25673	0.322788	0	0.557388	0.803794	0	0	0	0.221911	0	0	0.460363	0.667681	0	0	0	0	0	0	0.863971	0.195176	0.640566	0	0.796078
ENSG00000223429	0	0	0	0	0	0	0	0	0	0	0	0	0	0	0	0	0	0	0	0	0	0	0	0	0	0	0	0	0	0	NA
ENSG00000224255	0	0	0	0	0	0	0	0	0	0	0	0	0	0	0	0	0	0	0	0	0	0	0	0	0	0	0	0	0	0	NA
ENSG00000236004	0	0	0	0	0	0	0	0	0	0	0	0	0	0	0	0	0	0	0	0	0	0	0	0	0	0	0	0	0	0	NA
ENSG00000237663	0	0	0	0	0	0	0	0	0	0	0	0	0	0	0	0	0	0	0	0	0	0	0	0	0	0	0	0	0	0	NA
ENSG00000213735	0	0	0	0	0	0	0	0	0	0	0	0	0	0	0	0	0	0	0	0	0	0	0	0	0	0	0	0	0	0	NA
ENSG00000154222	4.19412	4.04913	4.28914	4.36559	3.71596	4.26966	3.79113	4.04843	4.23608	4.02922	4.16718	4.2286	2.79628	4.0536	3.17556	4.93103	4.07666	3.98043	5.34668	4.6668	3.20856	5.00368	4.52615	4.33376	4.70908	3.83803	4.98784	5.09964	4.53599	4.28508	0.215804
ENSG00000272100	0.831503	1.22921	1.09384	1.034	0.895284	1.07399	0.598484	0.572312	1.8499	1.04911	1.34488	1.059	0	1.45371	0.59152	2.17971	1.41116	0	2.05204	2.14939	0.156737	2.72036	2.398	1.34836	2.3514	0.905384	2.03159	2.83554	2.03325	1.97816	0.533115
ENSG00000224680	0	0	0	0	0	0	0	0	0	0	0	0	0	0	0	0	0	0	0	0	0	0.224691	0	0	0	0	0.171633	0	0	0	0.97366
ENSG00000085840	0	0.0523961	0	0	0	0	3.11455	1.66458	0.351731	0.584292	1.05191	0	0	0	0	0.624877	0.241075	0	0	0.265113	0	0	0	1.59436	1.99758	0.0923372	3.72895	0	0	1.03955	0.882796
ENSG00000134748	4.30579	3.5126	4.45851	4.31726	4.06491	4.51728	4.06318	4.32274	4.98844	4.32941	4.2635	4.89017	2.76234	3.65259	2.72326	4.45877	4.05579	2.71035	4.9014	5.33529	2.87352	4.47476	4.59833	4.42486	4.55068	3.79535	4.83046	4.92818	5.21748	4.75146	0.213154
ENSG00000134744	3.44882	3.67303	3.5731	3.87381	3.24171	3.60016	2.88641	3.89291	4.30756	3.48272	3.34477	4.24684	2.35577	2.77303	2.31825	3.73284	3.27727	3.98108	4.43034	4.89766	2.43112	4.362	3.81312	3.79973	3.88937	2.99984	4.77913	4.37512	4.58022	4.00874	0.257359
ENSG00000239063	0	0	0	0	0	0	0	0	0	0	0	0	0	0	0	0	0	0	0	0	0	0	0	0	0	0	0	0	0	0	NA
ENSG00000272371	0	0	0	0	0	0	0	0	0	0	0	0	0	0	0	0	0	0	0	0	0	0	0	0	0	0	2.93022	0	0	0	1
ENSG00000236290	0	0	0	0	0	0	0	0	0	0	0	0	0	0	0	0	0	0	0	0	0	0	0	0	0	0	1.19185	0	0	0	1
ENSG00000116157	3.37332	3.12525	3.72984	3.50714	1.65341	3.50362	2.53364	3.72469	4.12052	3.21852	2.84494	4.05212	2.36523	2.77466	0.923163	3.30132	2.71959	2.0215	3.61753	3.80481	2.59213	4.19967	3.56527	2.92842	3.47282	2.40692	3.29551	4.45017	4.01476	3.42238	0.296325
ENSG00000182183	0	0	0	0	0	0	1.92733	0	0	0	0	0	0	0	0	0	0	0	0	0	0	0.644256	0	2.01398	2.32137	0	0.34762	0	0	0	0.92672
ENSG00000162377	3.222	2.8722	2.58296	3.13685	2.57489	3.08855	2.43039	3.97691	3.04662	2.81144	2.85452	3.26711	2.08399	2.28153	2.43518	2.82064	2.62396	3.86359	3.04936	2.85087	1.95634	2.49203	2.32294	2.69445	2.32851	2.56031	2.64874	2.98972	3.23274	2.78073	0.30718
ENSG00000233664	0	0	0	0	0	0	0	0	0	0	0	0	0	0	0	0	0	0	0	0	0	0	0	0	0	0	0	0	0	0	NA
ENSG00000239640	0	0	0	0	0	0	0	0	0	0	0	0	0	0	0	0	0	0	0	0	0	0	0	0	0	0	0	0	0	0	NA
ENSG00000162378	3.63737	3.58505	3.90956	4.16985	3.95377	3.45442	2.09252	3.52716	4.10408	3.9525	3.49377	3.84072	3.31842	2.66683	3.03487	3.52911	3.05675	5.44817	3.95551	3.95793	1.66002	3.30075	3.59247	3.0854	2.7782	2.95027	3.76223	4.07696	4.32405	3.695	0.36413
ENSG00000252018	0	0	0	0	0	0	0	0	0	0	0	0	0	0	0	0	0	0	0	0	0	0	0	0	0	0	0	0	0	0	NA
ENSG00000228929	1.7218	0.502097	1.71467	0.982198	0.0146502	1.8264	1.15738	1.86572	1.71904	1.26043	1.18544	1.66989	0.26541	0.36945	0	1.52379	1.1433	1.24859	1.84174	2.65688	0.791596	0.741787	1.44819	1.07321	1.3356	0.946567	0.129268	1.48752	1.9078	1.7019	0.564236
ENSG00000206627	0	0	0	0	0	0	0	0	0	0	0	0	0	0	0	0	0	0	0	0	0	0	0	0	0	0	0	0	0	0	NA
ENSG00000203995	0	0	0	0	0	0	0	0	0	0	0	0	0	0	0	0	0	0	0	0	0	0	0	0	0	0	2.77974	1.89024	0	0	0.976552
ENSG00000242391	0	0	0	0	0	0	0	0	0	0	0	0	0	0	0	0	0	0	0	0	0	0	0	0	0	0	0.135437	0	0	0	1
ENSG00000121310	5.9306	5.98779	5.8226	6.27482	4.85484	6.34823	3.13097	5.13036	6.50864	5.9821	6.08077	6.85196	4.97606	5.91575	7.84081	5.57514	5.74025	4.48157	6.39415	7.72822	5.32291	6.72839	7.00346	5.74854	5.24211	5.85729	6.2779	7.32233	6.79253	6.43236	0.241622
ENSG00000230953	2.70516	2.51605	2.50953	3.40405	0.814716	3.41716	0.0990664	2.42432	2.97761	2.29505	2.72733	3.53456	1.30143	1.73569	2.497	2.22372	3.09972	1.06515	3.54979	4.42124	2.67184	2.52357	2.63169	2.54985	1.0275	2.67945	2.85856	3.97059	3.30949	3.11731	0.436599
ENSG00000231866	0	0	0	0	0	0	0	0	0	0	0	0	0	0	0	0	0	0	0	0	0	0	0	0	0	0	0	0	0	0	NA
ENSG00000116171	5.38323	5.01153	5.30913	5.36635	4.24978	5.3643	3.80204	4.95708	5.32278	5.29512	4.91233	5.14981	4.25753	5.07775	7.07123	5.05501	4.91628	4.39202	5.38641	5.40525	3.90233	4.94448	5.16307	5.49015	4.22989	5.10584	4.60847	5.25938	5.14098	5.2117	0.299395
ENSG00000264834	0	0	0	0	0	0	0	0	0	0	0	0	0	0	0	0	0	0	0	0	0	0	0	0	0	0	0	0	0	0	NA
ENSG00000266188	0	0	0	0	0	0	0	0	0	0	0	0	0	0	0	0	0	0	0	0	0	0	0	0	0	0	0	0	0	0	NA
ENSG00000265815	0	0	0	0	0	0	0	0	0	0	0	0	0	0	0	0	0	0	0	0	0	0	0	0	0	0	0	0	0	0	NA
ENSG00000237279	0	0	0	0	0	0	0	0	0	0	0	0	0	0	0	0	0	0	0	0	0	0	0	0	0	0	0	0	0	0	NA
ENSG00000236360	0	0	0	0	0	0	0	0	0	0	0	0	0	0	0	0	0	0	0	0	0	0	0	0	0	0	0	0	0	0	NA
ENSG00000226147	0	0	0	0	0	0	0	0	0	0	0	0	0	0	0	0	0	0	0	0	0	0	0	0	0	0	0	0	0	0	NA
ENSG00000174348	7.52736	3.7312	6.84548	6.89655	1.77234	7.1758	0	5.4608	7.4717	6.25365	6.38085	7.62884	5.10328	2.55048	2.69816	6.57236	5.6999	3.49384	8.13076	8.11069	3.25894	4.91724	6.51388	4.9	1.96177	6.31334	5.62402	6.74661	7.23234	7.03957	0.338905
ENSG00000162383	2.72483	0	2.02983	2.34111	0.682971	2.32045	0.0904946	0.559162	2.65025	2.01926	2.4729	2.808	0.822082	0	0.476371	1.99273	0.789625	0.575226	3.61047	3.46776	0	0.19577	1.96114	2.04829	0	1.8644	1.43892	1.94309	2.58491	2.36822	0.587141
ENSG00000235563	0.725329	0	0	0	0	0	0	0	2.34376	0.445312	0	1.18315	0	0	0	0	0	0	1.63097	1.92846	0	0	0	0	0	0	0	0	1.39775	1.80266	0.865915
ENSG00000157184	3.4473	4.67094	3.11325	4.28983	2.56373	3.5772	3.36073	3.62143	3.53544	4.08726	3.74617	3.82506	3.2795	4.02657	5.08442	3.59788	3.81336	3.77248	3.61038	3.44688	3.0921	4.1369	3.59672	4.17177	3.69854	4.06406	4.53973	3.77413	3.3919	3.48876	0.272016
ENSG00000162384	6.51612	5.64481	6.97126	6.69099	5.6358	6.46958	4.77446	5.85274	6.88188	6.52345	6.30061	6.94454	5.08957	5.41807	4.76326	6.14287	5.31731	5.74734	6.77307	6.85474	4.21994	6.08829	6.39748	5.78728	6.01368	5.8103	6.22554	6.42942	7.10147	6.44509	0.151562
ENSG00000259818	0	0	0	0	0	0	0	0	0	0	0	0	0	0	0	0	0	0	0	0	0	0	0	0	0	0	0.596145	0	0	0	1
ENSG00000162385	4.96438	4.58944	5.06798	4.78384	3.89874	5.05912	4.53042	5.03537	5.10224	4.76476	4.7973	5.24217	3.57685	4.37796	4.05385	4.99785	4.55201	3.77373	5.01998	5.31467	3.43705	4.96158	4.70193	4.76273	5.12214	4.41922	4.91695	5.46229	5.43113	4.99079	0.139895
ENSG00000226754	0	1.68072	0	0.573701	0	0	0	0	0	0	0	1.25636	0	0.213019	0	0	0	0	0	0	0.0746143	1.97518	0.507998	0	0	0	5.66823	2.34384	0	0	0.947527
ENSG00000270172	0.707322	0.784899	1.29525	0.329661	3.71156	0.847355	1.64905	1.20906	1.25196	0.413328	1.62911	2.43002	0	0.525225	0	1.93357	0.651503	0	0.969807	0.815252	0	3.25732	0.917712	1.51586	1.97394	0	5.25642	6.03623	1.0479	1.66727	0.78983
ENSG00000157193	1.43617	0.943461	2.16916	0.863931	3.48062	1.30385	2.85879	1.86786	1.61276	0.658082	2.20495	2.31159	0	0.626417	0	2.5417	1.22261	0	1.65082	1.04791	0	3.15401	1.07044	1.57096	2.21736	0.467305	5.50901	5.51388	1.57615	2.16725	0.708991
ENSG00000234578	0	0	0	0	0	0	0	0	0	0	0	0	0	0	0	0	0	0	0	0	0	0	0	0	0	0	2.39236	0.727193	0	0	0.989518
ENSG00000228838	0	0	0	0	0	0	0	0	0	0	0	0	0	0	0	0	0	0	0	0	0	0	0	0	0	0	2.87018	0	0	0	1
ENSG00000225030	0	0	0	0	0	0	0	0	0	0	0	0	0	0	0	0	0	0	0	0	0	0	0	0	0	0	0.744107	0	0	0	1
ENSG00000232762	0	0	0	0	0	0	0	0	0	0	0	0	0	0	0	0	0	0	0	0	0	0	0	0	0	0	0	0	0	0	NA
ENSG00000225675	0	0	0	0	0	0	0	0	0	0	0	0	0	0	0	0	0	0	0	0	0	0	0	0	0	0	1.78695	0	0	0	1
ENSG00000226938	0	0	0	0	0	0	0	0	0	0	0	0	0	0	0	0	0	0	0	0	0	0	0	0	0	0	2.96018	0	0	0	1
ENSG00000230138	0	0	0	0	0	0	0.466584	0	0	0	0	0	0	0	0	0	0	0	0	0	0	0	0	0.603175	1.32122	0	0	0	0	0	0.97208
ENSG00000236253	0	0	0	0	0	0	0	0	0	0	0	0.116427	0	0	0	0	0	0	0	0	0	0	0	0	0	0	3.13614	0	0	0	0.99872
ENSG00000143006	0	0	0	0	0	0	0	0	0	0	0	0	0	0	0	0	0	0	0	0	0	0	0	0	0	0	6.90929	0	0	0	1
ENSG00000174332	0.858284	0	1.22996	2.78857	1.38799	1.4098	0	2.14117	3.29872	0	0.0316884	0.848478	0	2.2055	0	0	0.58314	0	0.783513	0.670819	0	0	4.28857	0.257099	0	0.217062	2.59888	0.125453	2.10905	3.50488	0.782501
ENSG00000239007	0	0	0	0	0	0	0	0	0	0	0	0	0	0	0	0	0	0	0	0	0	0	0	0	0	0	0	0	0	0	NA
ENSG00000058804	2.86966	2.77771	2.77857	3.06914	1.89962	3.0792	3.30695	3.59552	3.15339	2.85973	2.98822	3.29013	1.48319	2.15027	1.88833	2.76395	2.84861	1.91179	3.34505	3.10279	1.74459	1.93382	2.69596	3.07525	3.18887	2.65459	3.59373	3.01175	3.32362	3.20132	0.232859
ENSG00000201003	0	0	0	0	0	0	0	0	0	0	0	0	0	0	0	0	0	0	0	0	0	0	0	0	0	0	0	0	0	0	NA
ENSG00000264454	0	0	0	0	0	0	0	0	0	0	0	0	0	0	0	0	0	0	0	0	0	0	0	0	0	0	0	0	0	0	NA
ENSG00000229687	0	0	0	0	0	0	0	0	0	0	0	0	0	0	0	0	0	0	0	0	0	0	0	0	0	0	0	0	0	0	NA
ENSG00000058799	4.56006	4.96902	4.72521	4.85036	3.82214	4.96285	5.66636	4.83067	4.71898	4.39717	4.55017	4.57894	3.32799	4.39828	4.4919	4.85905	5.22753	4.11629	4.87382	4.58759	3.57323	4.71106	5.5639	4.308	4.93972	4.67601	4.86103	5.75344	4.64779	4.68493	0.194006
ENSG00000211452	0	0	0	0	0	0	0	0	0	0	0	0.856525	0	3.82939	5.71646	0	0	0	0	0	0	0	0	0	0	0	0.467943	7.25623	0	0	0.948343
ENSG00000081870	3.15405	3.44296	3.66529	3.87507	2.82041	3.34196	3.07	3.26765	3.72555	3.08275	3.36945	4.2378	1.84546	2.82526	2.31302	3.4192	3.12107	0.912126	3.79952	4.16597	1.85858	3.80564	3.60102	3.13886	3.5054	3.12769	3.9024	4.97513	4.00112	3.6284	0.34832
ENSG00000116212	4.23612	5.02219	4.65398	4.68899	2.93894	4.37078	3.83196	5.0168	4.76992	4.23221	4.59739	4.78166	3.09493	3.71348	3.31497	4.56016	4.33599	3.31671	5.17829	4.74237	2.73549	5.09876	4.47452	3.79603	3.65945	4.10266	5.06726	5.07535	4.9353	4.70791	0.175123
ENSG00000219102	0	0	0	0	0	0	0	0	0	0	0	0	0	0	0	0	0	0	0	0	0	0	0	0	0	0	0	0	0	0	NA
ENSG00000203985	0	0.84038	0	0	0	0	0	0	1.83359	0	0	6.22516	0	0	0	3.33181	1.47162	0	0	0	0	0	0	0	0	0	0	0	0	0	0.958581
ENSG00000197015	0	0	0	0	0	0	0	0	0	0	0	1.86483	0	0	0	0	0	0	0	0	0	0	0	0	0	0	0	0	0	0	1
ENSG00000272091	2.86253	2.33111	3.66079	3.32024	3.77238	3.07728	0.672839	3.46359	3.37663	3.38984	3.05366	3.64412	1.67599	2.66381	2.3344	3.27279	2.31974	3.2323	3.89663	3.10049	1.31267	2.91444	3.02372	3.16649	2.51578	2.62829	1.82962	3.02756	3.68128	3.19564	0.269749
ENSG00000116209	6.82631	6.97748	7.239	7.05493	5.9676	6.98098	6.02812	6.70114	7.20154	6.77454	6.61077	7.19855	5.82951	6.48783	5.86348	7.04846	7.37925	5.47661	6.95073	6.9749	5.87799	6.88937	6.80911	6.76718	6.48483	6.74387	6.50271	7.30054	7.03802	6.96674	0.0954465
ENSG00000203276	0.495793	0.191532	0.528697	0.265666	0.428376	0.951284	0.285599	0.430103	1.8108	0.729171	0.65166	1.64461	0	0.411062	0	1.43101	1.20646	0	1.75304	2.7214	0	1.28109	1.74943	1.2683	1.78089	0.391007	1.15862	1.60362	2.13779	1.78384	0.665874
ENSG00000116205	1.40608	1.25401	1.28265	1.96307	1.00795	1.47942	1.90844	1.95408	1.53641	1.31499	1.58918	1.30142	0	0.69689	0	1.38572	1.31539	1.28579	1.85404	1.10725	0	0.682133	1.19912	1.51485	1.82799	1.02745	2.98039	1.5491	1.54741	1.51181	0.577669
ENSG00000264208	0	0	0	0	0	0	0	0	0	0	0	0	0	0	0	0	0	0	0	0	0	0	0	0	0	0	0	0	0	0	NA
ENSG00000225183	0	0	0	0	0	0	0	0	0	0	0	0	0	0	0	0	0	0	0	0	0	0	0	0	0	0	0	0	0	0	NA
ENSG00000237611	0.491033	0.225415	0.203888	0.300427	0.0306227	0.596481	0.518384	0.961895	0.502756	0.538737	0.782663	0.570699	0	0.102952	0	0.498723	0.359157	0.101522	1.08761	0.112345	0	0.196527	0.681995	0.696153	1.28457	0.199862	1.41655	0.670716	0.62776	0.452953	0.688514
ENSG00000212670	1.07441	1.27611	1.32115	1.82427	2.08569	1.15878	1.50974	1.27367	1.78781	1.76834	1.69514	2.04209	0.414632	1.14305	0.122266	1.52474	1.07548	1.08426	2.09353	1.71456	0	1.89035	2.01047	1.72448	2.53128	1.13917	2.46374	1.91045	2.15952	1.67979	0.414666
ENSG00000157211	0	0	0	0	0	0	0	0	0	0	0	0	0	0	0	0	0	0	0	0	0	0	0	0	0.275291	0	0	0	0	0	1
ENSG00000248835	2.13617	3.08947	2.2956	2.23216	1.75247	2.2708	1.3367	2.23783	2.65266	2.32462	2.01345	2.82028	0.857311	1.79703	1.35077	2.19414	1.96438	1.19757	2.63438	3.10668	1.94093	3.14425	2.67937	2.26833	3.10092	2.22195	1.96275	2.66759	2.92427	2.36167	0.293815
ENSG00000215883	1.19913	2.00824	1.36366	1.46405	0.31747	1.3335	0.768383	1.40748	1.44837	1.07875	0.908176	1.70834	0	0.642271	0.207047	1.23219	1.10233	0.291985	1.54721	1.90412	1.0796	1.83679	1.4226	1.16344	1.71755	1.34729	0.971683	1.62198	1.78496	1.228	0.41451
ENSG00000116221	5.55409	6.06173	5.64185	5.5343	4.76472	5.54301	5.39787	6.09881	5.58767	5.38663	5.61092	5.49665	5.03469	5.22963	5.56829	5.31177	5.31656	6.0683	5.52732	5.72965	4.90345	4.66606	5.38153	5.17413	5.2855	5.33331	5.54378	5.30413	5.56393	5.60769	0.11159
ENSG00000157216	5.2846	5.19097	6.69087	5.6161	5.96865	5.38627	4.05213	5.18132	6.57673	5.56919	5.58488	6.17241	3.8789	4.77421	4.47644	5.28218	4.41687	3.91465	6.2229	7.15233	3.45579	5.26591	5.85996	5.1609	5.02098	5.70084	5.85329	5.10821	6.65776	6.201	0.255006
ENSG00000198711	0.769235	0.341877	1.79921	1.21062	0.66581	0.905947	0	0.995898	2.03869	0.705104	0.704141	1.89114	0	0	0	0.943664	0	0	1.56874	2.49202	0	0.633486	1.20654	0.698959	0.859336	0.752802	0.900181	0.431526	1.81017	1.66162	0.674897
ENSG00000225632	0	0	0	0	0	0	0	0	0	0	0	0	0	0	0	0	0	0	0	0	0	0	0	0	0	0	0	0	0	0	NA
ENSG00000232245	0	0	0	0	0	0	0	0	0	0	0	0	0	0	0	0	0	0	0	0	0	0	0	0	0	0	0	0	0	0	NA
ENSG00000265404	0	0	0	0	0	0	0	0	0	0	0	0	0	0	0	0	0	0	0	0	0	0	0	0	0	0	0	0	0	0	NA
ENSG00000235741	0	0	0	0.242949	0	0	0	0	0	0	0	0	0	0	0	0	0	0	0	0	0	0	0.49303	0	0	0	0.202423	0	0	0	0.96885
ENSG00000237173	0	0	0	0	0	0	0	0	0	0	0	0	0	0	0	0	0	0	0	0	0	0	0	0	0	0	0	0	0	0	NA
ENSG00000252646	0	0	0	0	0	0	0	0	0	0	0	0	0	0	0	0	0	0	0	0	0	0	0	0	0	0	0	0	0	0	NA
ENSG00000227453	0	0	0	0	0	0	0	0	0	0	0	0	0	0	0	0	0	0	0	0	0	0	0	0	0	0	0	0	0	0	NA
ENSG00000162390	0	0.734303	1.58329	2.97838	0.527726	0	0	0	1.33033	2.32241	2.33609	1.2911	2.15176	2.09488	0	0.271548	1.84875	0.37164	0.898559	2.12263	0	2.62087	1.66516	2.93181	0	1.91587	1.38797	3.02378	1.22142	2.03438	0.582153
ENSG00000162391	0	0	0	0	0	0	0	0	0	1.27352	0	0	0.201802	5.40925	2.16515	0	0	0	0	0	0	0	0	6.85098	0	0	0.938438	0.137098	0	0	0.949037
ENSG00000230728	0	0	0	0	0	0	0	0	0	0	0	0	0	0	0	0	0	0	0	0	0	0	0	0	0	0	0	0	0	0	NA
ENSG00000184313	0.785022	1.72271	3.62171	4.07398	2.83302	1.06075	0	1.27368	2.58769	3.96125	3.85935	3.92284	3.01065	3.02467	0.522085	1.98712	2.93793	1.44641	2.82424	4.37675	0.0662759	5.4981	4.20807	3.30421	0.369319	3.00246	7.2281	5.49377	3.38226	3.04727	0.626918
ENSG00000243725	4.55849	4.36556	4.82005	4.9163	4.57498	4.68015	3.58875	4.95696	4.91025	4.81959	4.98755	5.07535	3.94994	4.14057	3.56905	4.46868	4.33189	4.93293	5.18418	5.2468	3.18904	5.88288	5.21019	4.50802	4.5584	4.29083	5.82138	5.23349	5.14531	4.89986	0.209075
ENSG00000162396	1.235	2.25265	1.56016	2.32837	1.22714	1.63697	1.40911	2.38981	2.15148	2.1829	2.07293	2.49116	0.890374	1.84499	1.41492	1.24894	1.84602	1.45048	2.34223	2.55343	0.826618	2.09623	2.26055	1.75553	1.76018	1.79947	3.57229	2.03186	2.5815	2.07057	0.48153
ENSG00000006555	0	0	0	2.66708	0	1.75914	0.97522	4.50787	4.67071	3.32924	5.63335	2.28655	0	3.02833	1.94278	1.78864	4.46886	0	0	0	2.45211	3.2393	3.36607	4.28197	1.5789	2.86841	0.393965	2.84718	1.53626	6.08015	0.661862
ENSG00000237453	0	0	0	0	0	0	0	0	0	0	0.011569	0	0	0	0	0	0	0	0	0	0	0	0	0	0	0	3.65422	0	0	1.25753	0.988024
ENSG00000162398	0	0	0	0	0	0	0	0	1.0951	0	2.87537	0	0	0	0	0	0.183142	0	0	0	0	0	0	0	0	0	3.53594	0	0	2.87323	0.931474
ENSG00000116133	6.34645	10.7481	5.09649	5.06796	6.73339	6.85984	4.80255	8.25986	6.46098	5.28615	7.5489	5.56512	3.7791	5.42192	8.69889	8.13634	7.88446	7.26727	7.02312	6.09192	4.57371	5.08314	7.12489	5.62486	7.50766	7.06794	6.11614	5.21807	4.48826	7.58571	0.413781
ENSG00000242396	0	0	0	0	0	0	0	0	0	0	0	0	0	0	0	0	0	0	0	0	0	0	0	0	0	0	0	0	0	0	NA
ENSG00000233203	0	0	0	0	0	0	0	0	0	0	0	0	0	0	0	0	0	0	0	0	0	0	0	0	0	0	4.60284	0	0	0	1
ENSG00000143001	0	2.69231	2.68166	1.86479	0.995912	2.30988	0	1.35509	0.655005	1.71808	1.42693	2.15166	0	3.85996	0	0.690618	3.71844	0	0	0	0.886706	5.83358	1.95194	2.19623	0	1.83952	0	0	0	0.542619	0.801758
ENSG00000162399	0	0	0	0	0	0	0	0	0	0	0	0	0	3.44207	0	0	0.169135	0	0	0	0	1.0378	0	0	0	0	0	0	0	0	0.987909
ENSG00000169174	0	0	0	0	2.27411	0	0	0.818534	0.333481	1.8011	1.44199	0	0	0	4.77767	3.48662	0	0	1.23729	0	1.72848	0	0	2.28956	0	0.916401	0.182075	0	0	1.17794	0.87234
ENSG00000162402	4.72803	3.60543	4.30618	4.49535	4.1242	4.60495	3.25117	4.53215	4.37864	4.28393	4.14005	4.49167	3.2228	3.76346	3.06897	4.43369	4.1551	5.21807	4.91654	4.76004	3.05358	4.6904	4.39921	4.43153	4.73188	3.91748	3.89345	4.34443	4.77021	4.26792	0.195353
ENSG00000231090	0	0	0	0	0	0	0	0	0	0	0	0	0	0	0	0	0	0	0	0	0	0	0	0	0	0	0	0	0	0	NA
ENSG00000231095	0	0	0	0	0	0	0	0	0	0	0	0	0	0	0	0	0	0	0	0	0	0	0	0	0	0	0	0	0	0	NA
ENSG00000265822	0	0	0	0	0	0	0	0	0	0	0	0	0	0	0	0	0	0	0	0	0	0	0	0	0	0	0	0	0	0	NA
ENSG00000231900	0	0	0	0	0	0	0	0	0	0	0	0	0	0	0	0	0	0	0	0	0	0	0	0	0	0	0	0	0	0	NA
ENSG00000232198	0	0	0	0	0	0	0	0	0	0	0	0	0	0	0	0	0	0	0	0	0	0	0	0	0	0	0	0	0	0	NA
ENSG00000199831	0	0	0	0	0	0	0	0	0	0	0	0	0	0	0	0	0	0	0	0	0	0	0	0	0	0	0	0	0	0	NA
ENSG00000252162	0	0	0	0	0	0	0	0	0	0	0	0	0	0	0	0	0	0	0	0	0	0	0	0	0	0	0	0	0	0	NA
ENSG00000272051	0	0	0	0	0	0	0	0	0	0	0	0	0	0	0	0	0	0	0	0	0	0	0	0	0	0	0	0	0	0	NA
ENSG00000234810	0	0	0	0	0	0	0	0	0	0	0	0	0	0	0	0	0	0	0.632459	0	0	0	0	0	0	0	0.667856	0	0	0	0.967345
ENSG00000233147	0	0	0	0	0	0	0	0	0	0	0	0	0	0	0	0	0	0	1.33533	0	0	0	0	0	0	0	3.28791	0	0	0	0.985995
ENSG00000230250	0	0	0	0	0	0	0	0	0	0	0	0	0	0	0	0	0	0	0	0	0	0	0	0	0	0	2.52674	0	0	0	1
ENSG00000227104	0	0	0	0	0	0	0	0	0	0	0	0	0	0	0	0	0	0	0	0	0	0	0	0	0	0	0	0	0	0	NA
ENSG00000233079	0	0	0	0	0	0	0	0	0	0	0	0	0	0	0	0	0	0	0	0	0	0	0	0	0	0	2.18924	0	0	0	1
ENSG00000235612	0	0	0	0	0	0	0	0	0	0	0	0	0	0	0	0	0	0	0	0	0	0	0	0	0	0	0	0	0	0	NA
ENSG00000229871	0	0	0	0	0	0	0	0	0	0	0	0	0	0	0	0	0	0	0	0	0	0	0	0	0	0	0	0	0	0	NA
ENSG00000260971	0.394239	0	0.407921	0	0	0.303124	0	0	1.16559	0	0	0	0	0	0	0.681134	0	0.516507	0.742829	0	0	0	0.595457	0	0	0	0	1.2211	0.946113	0.946173	0.810824
ENSG00000223307	0	0	0	0	0	0	0	0	0	0	0	0	0	0	0	0	0	0	0	0	0	0	0	0	0	0	0	0	0	0	NA
ENSG00000223956	0	0	0	0	0	0	0	0	0	0	0	0	0	0	3.59539	0	0	0	0	0	0	0	0	0	0	0	0	0	0	0	1
ENSG00000162407	7.48604	5.48049	7.09402	7.42657	5.59083	7.42096	0.545611	7.16052	8.53068	6.01421	6.11008	7.61266	5.35719	5.68486	5.24146	6.89631	6.3462	4.79634	7.52522	6.85221	4.07838	4.91487	6.90279	5.58715	4.68922	5.88262	5.4106	8.24224	7.02671	7.70709	0.284193
ENSG00000236776	0	0	0	0	0	0	0	0	0.418048	0	0	0	0	0	0	0	0	0	0	0	0	0	0	0	0	0	0	0.135355	0	0	0.988835
ENSG00000224980	0	0	0	0	0	0	0	0	0	0	0	0	0	0	0	0	0	0	0	0	0	0	0	0	0	0	0	0	0	0	NA
ENSG00000225475	0	0	0	0	0	0	0	0	0	0	0	0	0	0	0	0	0	0	0	0	0	0	0	0	0	0	0	0	0	0	NA
ENSG00000162409	1.35669	0.0639054	2.95267	2.0697	1.96561	1.34221	0	0.46966	1.93103	2.91073	3.18268	2.6432	3.97716	2.78427	0	1.70666	2.40853	4.85841	2.67892	1.66933	0.587025	1.5986	2.38398	1.38948	0.924247	1.92364	1.17943	2.44239	2.35746	1.73223	0.626446
ENSG00000187889	0	0	0	0	0	0	0	0	1.30171	0	0	4.42883	1.35834	2.6364	3.77839	1.74719	0	1.22826	0	0	0	2.16975	2.30645	1.23704	0	0	1.90792	0.432331	0	0	0.843473
ENSG00000229913	0	0	0	0	0	0	0	0	0	0	0	0	0	0	0	0	0	0	0	0	0	0	0	0	0	0	0	0	0	0	NA
ENSG00000157131	0	0	0	0	0	0	0	0	0	0	0	0	0	0	8.24978	0	0	0	0	0	0	0	0	0	0	0	0	0	0	0	1
ENSG00000021852	0	0	0	0	0	0	0	0	0	0	0	0	0	0	8.32205	1.44682	0	0	0	0	0	0	0	0	0	0	0.388184	0	0	0	0.992397
ENSG00000236341	0	0	0	0	0	0	0	0	0	0	0	0	0	0	1.63108	0	0	0	0	0	0	0	0	0	0	0	0	0	0	0	1
ENSG00000221591	0	0	0	0	0	0	0	0	0	0	0	0	0	0	0	0	0	0	0	0	0	0	0	0	0	0	0	0	0	0	NA
ENSG00000173406	0	0	0.380111	1.08572	2.67386	0	0	0	0.623886	0	0	1.16513	0	0	1.12272	0	0	0	3.0041	0.269083	0	0	1.17202	2.96577	0	0	0	0	0	0.412785	0.863737
ENSG00000227935	0	0	0	0	0	0	0	0	0	0	0	0	0	0	0	0	0	0	0	0	0	0	0	0	0	0	0.694172	0	0	0	1
ENSG00000236888	0	0	0	0	0	0	0	0	0	0	0	0	0	0	0	0	0	0	0	0	0	0	0	0	0	0	0	0	0	0	NA
ENSG00000238773	0	0	0	0	0	0	0	0	0	0	0	0	0	0	0	0	0	0	0	0	0	0	0	0	0	0	0	0	0	0	NA
ENSG00000226759	0	0	0	0	0	0	0	0	0	0	0	0	0	0	0	0	0	0	0	0	0	0	0	0	0	0	4.27019	0	0	0	1
ENSG00000229887	0	0	0	0	0	0	0	0	0	0	0	0	0	0	0	0	0	0	0	0	0	0	0	0	0	0	0	0	0	0	NA
ENSG00000223416	0	0	0	0	0	0	0	0	0	0	0	0	0	0	0	0	0	0	0	0	0	0	0	0	0	0	0	0	0	0	NA
ENSG00000235038	0	0	0	0	0	0	0	0	0	0	0	0	0	0	0	0	0	0	0	0	0	0	0	0	0	0	0	0	0	0	NA
ENSG00000230546	0	0	0	0	0	0	0	0	0	0	0	0	0	0	0	0	0	0	0	0	0	0	0	0	0	0	0	0	0	0	NA
ENSG00000233216	0	0	0	0	0	0	0	0	0	0	0	0	0	0	0	0	0	0	0	0	0	0	0	0	0	0	0	0	0	0	NA
ENSG00000162600	2.51207	3.49561	2.7099	3.67726	2.02815	2.84364	2.73189	2.90206	3.33325	3.14142	3.01648	3.54215	2.2825	2.84628	2.62873	2.98306	3.19388	2.70148	3.20376	3.46092	2.23476	3.3288	3.69328	3.07696	3.50452	2.8373	2.68891	3.59978	3.493	3.34608	0.184496
ENSG00000270209	0	0	0	0	0	0	0	0	0	0	0	0	0	0	0	0	0	0	0	0	0	0	0	0	0	0	0	0	0	0	NA
ENSG00000264128	0	0	0	0	0	0	0	0	0	0	0	0	0	0	0	0	0	0	0	0	0	0	0	0	0	0	0	0	0	0	NA
ENSG00000184292	2.83186	0.397032	2.92931	8.6714	0	7.76258	1.18353	9.16776	8.52333	1.00261	9.35991	4.81634	0	7.16298	1.73123	7.19565	9.90239	0.413325	4.81433	1.50282	6.162	2.33264	7.75821	1.32356	1.15066	4.4109	0.606969	3.64836	3.51848	9.6149	0.582154
ENSG00000185839	0	0	0	0	0	0	0	0	0	0	0	0	0	0	0	0	0	0	0	0	0	0	0	0	0	0	0	0.0299439	0	0	1
ENSG00000162601	4.33689	3.43421	4.16143	4.54614	3.15069	4.71521	3.17543	4.30065	4.64982	4.22036	4.03147	4.57885	2.93372	3.24639	2.50373	4.45914	4.36614	3.07128	4.99052	4.86417	3.16885	4.03585	4.34204	4.46909	4.38107	3.80987	3.47114	4.7734	4.91947	4.49564	0.19425
ENSG00000222168	0	0	0	0	0	0	0	0	0	0	0	0	0	0	0	0	0	0	0	0	0	0	0	0	0	0	0	0	0	0	NA
ENSG00000264081	0	0	0	0	0	0	0	0	0	0	0	0	0	0	0	0	0	0	0	0	0	0	0	0	0	0	0	0	0	0	NA
ENSG00000177606	9.24785	6.42928	8.54403	8.56773	6.40842	9.39522	6.40896	8.52265	8.66821	8.10719	7.59526	9.89096	6.90183	6.81199	7.30897	8.88373	7.67404	6.66456	8.86339	8.89816	7.12267	7.45636	7.70865	7.22457	6.10383	8.51999	5.87852	8.50494	8.51267	8.5957	0.213739
ENSG00000234807	0	0.691192	0	0	0.638383	0	0	0	0	0	0	0.209837	0	0	0	0	0	0	0	0.3719	0	0.237452	0	0	0	0	0	1.61182	0	0	0.95403
ENSG00000272226	0	0	0	0	0	0	0	0	0	0	0	0	0	0	0	0	0	0	0	0.176196	0	0	0	0	0.192799	0	1.5868	0.0939528	0	0	0.98994
ENSG00000231740	0	0	0	0	0	0	0	0	0	0	0	0	0	0	0	0	0	0	0	0	0	0	0	0	0	0	0	0	0	0	NA
ENSG00000232453	0.309888	1.46292	1.16292	0.293734	0.972721	0.391502	0	0	0.986341	0.860895	0.60341	1.47197	0	1.07312	0	0.917942	0	0.11154	1.43497	1.9105	0.566277	2.62611	1.26484	1.24421	0.0536872	1.54056	0.875277	2.1599	1.08981	0.341617	0.696673
ENSG00000228121	0	0	0	0	0	0	0	0	0	0	0	0	0	0	0	0	0	0	0	0	0	0	0	0	0	0	0	0	0	0	NA
ENSG00000230812	0	0	0	0	0	0	0.838215	0	1.82034	0	0	0	0	0	0	0	0	0.29237	0	1.20259	0	0	0	0	0.648556	0	0	0	0.701306	0.399219	0.92267
ENSG00000241042	0	0	0	0	0	0	0	0	0	0	0	0	0	0	0	0	0	0	0	0	0	0	0	0	0	0	0	0	0	0	NA
ENSG00000235215	0	0	0	0	0	0	0	0	0	0	0	0	0	0	0	0	0	0	0	0	0	0	0	0	0	0	0	0	0	0	NA
ENSG00000237352	0	0	0	0	0	0	0	0	1.42867	0	0	1.20137	0	0	0	0	0	0	0	0.241948	0.0374618	0	0.409797	0	0	0	0	0	1.81196	0.374071	0.929714
ENSG00000224609	0.708307	0	0	0	0	0	0	0	0	0	0	0	0	0	0	0	0	2.07421	0	0	0	0	0	0	0	0	3.81128	0	0	0	0.974825
ENSG00000270457	0	0	0.134914	0	0.31793	0	0	0	0.154984	0	0	0.432898	0	0	0	0	0	0.725128	0	0	0	0	0	0	0	0	0	0	0.756412	0	0.9195
ENSG00000172456	1.24798	2.90221	1.7232	2.76534	1.41474	1.75503	0.935897	1.94408	2.2812	1.47196	1.38451	2.1086	1.09726	2.03599	3.9391	1.90422	2.39729	3.19843	2.23419	2.00627	1.49487	2.6685	2.20449	1.5312	1.08019	1.45153	1.94695	2.06764	2.23418	2.07801	0.513577
ENSG00000266150	0	0	0	0	0	0	0	0	0	0	0	0	0	0	0	0	0	0	0	0	0	0	0	0	0	0	0	0	0	0	NA
ENSG00000226883	0	0	0	0	0	0	0	0	0	0	0	0	0	0	0	0	0	0	0	0	0	0	0	0	0	0	0	0	0	0	NA
ENSG00000231816	0	0	0	0	0	0	0	0	0	0	0	0	0	0	0.682577	0.711349	0.509354	0	0.144008	0	0	0	0.0642466	0	0	0	0	0	0.0981639	0	0.927367
ENSG00000134709	0	2.66858	0	1.96697	2.697	2.25088	1.42476	3.68032	2.64483	2.24035	3.02145	2.28627	0.627356	3.29081	3.62275	2.16858	3.99657	0	0	0	3.65021	4.00345	2.71693	3.47956	0.928806	3.18912	5.73211	3.79856	0	3.37366	0.616632
ENSG00000134716	0.121207	0	0	4.33192	3.73753	1.591	0	3.01396	1.36916	3.10472	2.67904	0.79385	5.39499	0.493693	5.25833	0.970603	4.16558	3.11554	4.16209	0	0	0.800663	1.76247	5.06734	0	1.47292	2.21564	0	0	2.46868	0.663188
ENSG00000265535	0	0	0	0	0	0	0	0	0	0	0	0.427836	0	0	0	0	0	0	0	0	0	0	0	0	0	0	0	0	0	0	1
ENSG00000162598	0	0	0	0	0.147979	0	0	0	0	0	0	3.64706	0	0	0	1.41694	0	0	0	0	0	0	0	0	0	0	2.74399	0	0	0	0.959259
ENSG00000229332	0	0	0	0	0	0	0	0	0	0	0	0	0	0	0	0	0	0	0	0	0	0	0	0	0	0	0	0	0	0	NA
ENSG00000238242	0	0	0	0	0	0	0	0	0	0	0	0	0	0	0	0	0	0	0	0	0	0	0	0	0	0	0	0	0	0	NA
ENSG00000226476	0	0	0	1.35047	0.0657104	0	0	0	0	0	0	0	0	0	0	0	0	0	0	0	0	0	2.35822	0	1.64195	0	0	0	0	1.31987	0.935983
ENSG00000231252	0	0	0	0	0	0	0	0	0	0	0	0	0	0	0	0	0	0	0	0	0	0	0	0	1.57104	0	0	0	0	0	1
ENSG00000162599	4.3626	3.8007	5.04771	4.66655	3.94087	4.27855	0	3.30376	4.20163	4.20083	4.55906	4.4473	3.21959	2.43023	3.19684	3.70231	3.72556	2.71161	4.53426	4.34073	2.12151	3.2818	4.43856	3.27909	3.01876	3.57012	3.29433	4.81083	4.24484	4.25361	0.276309
ENSG00000237928	0	0	0	0	0	0	0	0	0	0	0	0	0	0	0	0	0	0	0.229792	0	0	0	0	0	0	0	0	0.782145	0	0	0.989869
ENSG00000263380	0	0	0	0	0	0	0	0	0	0	0	0	0	0	0	0	0	0	0	0	0	0	0	0	0	0	0	0	0	0	NA
ENSG00000270742	0	0	0	0	0	0	0	0	0	0	0	0	0	0	0	0	0	0	0	0	0	0	0	0	0	0	0	0	0	0	NA
ENSG00000237853	0	0	0	0	0	0	0	0	0	0	0	0	0	0	0	0	0	0	0	0	0	0	0	0	0	0	5.51935	0	0	0	1
ENSG00000264551	0	0	0	0	0	0	0	0	0	0	0	0	0	0	0	0	0	0	0	0	0	0	0	0	0	0	0	0	0	0	NA
ENSG00000223920	0	0	0	0	0	0	0	0	0	0	0	0	0	0	0	0	0	0	0	0	0	0	0	0	0	0	3.44443	0	0	0	1
ENSG00000162604	3.5681	3.57854	4.3319	3.87498	3.09637	3.69443	2.45856	3.63577	3.91409	3.47109	3.46859	4.0321	2.6778	2.99837	2.07581	3.88717	3.45454	2.53532	4.15193	4.25684	2.15917	3.61446	3.69007	3.42513	3.64509	3.32834	3.79086	4.01577	4.19645	3.86477	0.19952
ENSG00000271200	0	0	2.15281	1.21994	1.63487	0.284565	0	0	1.04161	0.849696	0.806312	1.26691	0	0.222854	0	0.443368	0	0	2.26895	2.73355	0	1.53281	1.56525	0.488487	0.960113	0	1.06991	1.76558	2.18478	1.30714	0.709032
ENSG00000132849	1.98787	2.4882	3.29469	3.94768	3.54273	3.49338	1.02017	3.62451	3.52858	2.86743	3.60187	3.35193	3.30928	3.70263	2.12881	3.19865	4.28458	3.06539	2.80814	3.22719	2.73655	3.76095	3.90969	3.15069	1.52377	3.12491	2.3295	4.19056	3.08887	4.05147	0.275219
ENSG00000200575	0	0	0	0	0	0	0	0	0	0	0	0	0	0	0	0	0	0	0	0	0	0	0	0	0	0	0	0	0	0	NA
ENSG00000212360	0	0	0	0	0	0	0	0	0	0	0	0	0	0	0	0	0	0	0	0	0	0	0	0	0	0	0	0	0	0	NA
ENSG00000236646	0	0	0	0	0	0	0	0	0	0	0	0	0	0	0	0	0	0	0	0	0	0	0	0	0	0	0	0	0	0	NA
ENSG00000242860	0	0	0	0	0	0	0	0	0	0	0	0	0	0	0	0	0	0	0	0	0	0	0	0	0	0	0	0	0	0	NA
ENSG00000263908	0	0	0	0	0	0	0	0	0	0	0	0	0	0	0	0	0	0	0	0	0	0	0	0	0	0	0	0	0	0	NA
ENSG00000234204	0	0	0	0	0	0	0	0	0	0	0	0	0	0	0	0	0	0	0	0	0	0	0	0	0	0	0	0	0	0	NA
ENSG00000234088	0	0	0	0	0	0	0	0	0	0	0	0	0	0	0	0	0	0	0	0	0	0	0	0	0	0	0	0	0	0	NA
ENSG00000240563	0	0	0	0	0	0	0	0	0	1.22452	0	0	0	0	0	0.369574	0	0	1.83889	0	0	0	0	0	0.837925	0	3.34855	0.303785	0	0	0.952891
ENSG00000237227	0	0	0	0	0	0	0	0	0	0	0	0	0	0	0	0	0	0	0	0	0	0	0	0	0	0	0	0	0	0	NA
ENSG00000132854	1.07098	0	0	0	0.330402	1.02584	0	0	0	0	0	0	0	0	0	1.24413	0.260013	0	5.18156	0	2.57155	0	0.66189	0	0	0.189166	0.153894	0	0	0	0.950036
ENSG00000201153	0	0	0	0	0	0	0	0	0	0	0	0	0	0	0	0	0	0	0	0	0	0	0	0	0	0	0	0	0	0	NA
ENSG00000162607	4.24562	3.51095	4.59353	4.42119	3.73241	4.39385	4.16033	4.50585	4.79167	4.23342	4.34924	4.85898	2.66489	3.15686	2.41019	4.33329	4.17039	3.16045	4.87993	5.01885	3.01643	4.16985	4.15725	4.18769	4.32377	3.87057	5.76827	4.3764	4.96211	4.48442	0.287778
ENSG00000116641	3.07451	2.09357	3.67196	3.53303	2.66627	3.09617	1.36898	3.70499	3.73198	3.08676	2.8542	3.35306	1.19416	2.05095	1.30662	2.57867	3.05153	0.709797	4.25059	3.90722	1.18238	3.5617	2.87626	2.51427	2.06008	2.75933	3.7933	2.76944	3.729	3.21623	0.355089
ENSG00000270549	0	0	0	0	0	0	0	0	0	0	0	0	0	0	0	0	0	0	0	0	0	0	0	0	0	0	0	0	0	0	NA
ENSG00000132855	0	0	0	0	0	0	0	0	0	0	0	0	0	2.71146	7.27	0	0	0	0	0	0	0	0	0	0	1.19755	0	0	0	0	0.981459
ENSG00000269624	0	0	0	0	0	0	0	0	0	0	0	0	0	0	3.22437	0	0	0	0	0	0	0	0	0	0	0	0	0	0	0	1
ENSG00000213703	0	0	0	0	0	0	0	0	0	0	0	0	0	0	0	0	0	0	0	0	0	0	0	0	0	0	0	0	0	0	NA
ENSG00000235545	0	0	0	0	0	0	0	0	0	0	0	0	0	0	0	0	0	0	0.420448	0	0	0	0	0	0	0	0	0	0	0	1
ENSG00000125703	3.05938	2.74301	3.16387	3.04716	3.69158	2.96792	2.63917	2.83467	3.31045	2.82733	2.62014	3.28127	1.51652	2.36503	2.12984	2.92809	2.60802	1.42342	3.45225	3.20001	2.30616	2.71926	2.82116	2.93197	3.66587	2.69443	3.05148	3.60263	3.47561	2.95918	0.23082
ENSG00000234318	0	0	0	0	0	0	0	0	0	0	0	0	0	0	0	0	0	0	0	0	0	0	0	0	0	0	0	0	0	0	NA
ENSG00000237163	0	0	0	0	0	0	0	0	0	0	0	0	0	0	0	0	0	0	0	0	0	0	0	0	0	0	0	0	0	0	NA
ENSG00000229537	0	0	0	0	0	0	0	0	0	0	0	0	0	0	0	0	0	0	0	0	0	0	0	0	0	0	0.210792	0	0	0	1
ENSG00000227485	0	0	0	0	0	0	0	0	0	0	0	0	0	0	0	0	0	0	0	0	0	0	0	0	0	0	0	0	0	0	NA
ENSG00000229225	0	0	0	0	0	0	0	0	0	0	0	0	0	0	0	0	0	0	0	0	0	0	0	0	0	0	0	0	0	0	NA
ENSG00000203605	0	0	0	0	0	0	0	0	0	0	0	0	0	0	0	0	0	0	0	0	0	0	0	0	0	0	0.167143	0	0	0	1
ENSG00000271593	0	0	0	0	0	0	0	0	0	0	0	0	0	0	0	0	0	0	0.876977	0	0	0	0	0	0	0	3.13555	0	0	0	0.990356
ENSG00000252259	0	0	0	0	0	0	0	0	0	0	0	0	0	0	0	0	0	0	0	0	0	0	0	0	0	0	0	0	0	0	NA
ENSG00000224209	0	0	0	0	0	0	0	0	0	0	0	0	0	0	0	0	0	0	0	0	0	0	0	0	0	0	2.34876	0	0	0	1
ENSG00000228734	0	0	0	0	0	0	0	0	0	0	0	0	0	0	0	0	0	0	0	0	0	0	0	0	0	0	0	0	0	0	NA
ENSG00000223683	0	0	0	0	0	0	0	0	0	0	0	0	0	0	0	0	0	0	0	0	0	0	0	0	0	0	1.25247	0	0	0	1
ENSG00000230798	0	0	0	0.753675	0	0	0	0	1.52857	2.83485	1.89183	0.110249	0	0	0	0	0	0.13656	6.29336	0	0	0	1.8041	1.34642	0	0.804093	3.83903	0	0	1.88176	0.90723
ENSG00000187140	0	0	0	0.73367	0	0	0	0	1.30446	2.55995	1.75987	0	0	0	0	0	0	0	5.70094	0	0	0	1.41821	1.14188	0	0.563429	1.74115	0	0	1.59672	0.922461
ENSG00000252784	0	0	0	0	0	0	0	0	0	0	0	0	0	0	0	0	0	0	0	0	0	0	0	0	0	0	0	0	0	0	NA
ENSG00000236674	0	0	0	0	0	0	0	0	0	0	0	0	0	0	0	0	0	0	0	0	0	0	0	0	0	0	0	0	0	0	NA
ENSG00000088035	2.39234	2.32348	1.82497	2.33126	1.67014	2.5638	2.24746	2.85015	2.79454	2.10993	2.27019	2.69415	0.607019	1.61398	1.40904	2.34344	2.51541	0.885159	3.41829	2.816	1.32033	1.95896	2.51168	2.68467	3.06841	1.8855	2.20213	2.68186	2.79669	2.83765	0.352264
ENSG00000142856	1.90075	1.88906	2.04195	2.30183	1.25568	2.3341	2.152	2.2388	2.52256	2.08755	2.29437	2.70516	0.536333	1.60646	0.187901	2.04972	2.06881	0.281147	2.7547	3.093	0.999613	2.39287	2.35765	1.99251	2.34072	1.58263	3.46389	2.43791	2.75687	2.4638	0.426334
ENSG00000203965	1.58866	1.49151	1.72507	2.19079	2.30058	1.97857	0.513821	1.80373	2.45216	1.60149	1.70113	2.73682	0.926739	1.06893	0	1.59662	1.91888	2.73926	2.60779	2.97245	0.548397	2.88803	2.0633	1.22703	1.338	1.04536	3.10717	2.39077	2.73773	2.16303	0.4194
ENSG00000264271	0	0	0	0	0	0	0	0	0	0	0	0	0	0	0	0	0	0	0	0	0	0	0	0	0	0	0	0	0	0	NA
ENSG00000251720	0	0	0	0	0	0	0	0	0	0	0	0	0	0	0	0	0	0	0	0	0	0	0	0	0	0	0	0	0	0	NA
ENSG00000116652	0	0	0	0.208188	0	0.514348	0	0.658578	0.248998	0	0	0.853688	0	0	0	0	0.471197	2.04905	1.13058	1.07126	0	0.62613	0.0771312	0	0	0	0.127596	0.465506	0.692537	0.200245	0.876377
ENSG00000079739	6.17175	6.10039	5.85167	5.75185	4.57469	5.94719	4.94605	5.34664	5.22518	5.50221	5.23292	4.66919	6.28526	4.65007	6.38531	5.41728	5.39984	8.78239	4.93564	5.92329	5.76861	5.32102	5.52025	5.21981	4.15006	4.75502	3.83992	4.8934	4.83591	4.83274	0.397489
ENSG00000244256	0.535074	0.375229	0	0.089683	0	0.46114	0	0	0	0	0	0	0	0	1.7281	0.798076	0.56393	0.66679	0.0447526	1.14181	1.15584	0.619878	0.91195	0.272916	0	0	0	0.324982	0	0.371551	0.83371
ENSG00000185483	2.06451	0	3.8731	2.31055	0	1.40943	0	2.86649	3.33219	2.37435	1.4611	2.48965	1.24833	0	0	2.52419	0.793143	0	2.66646	2.7536	1.33169	0	1.87815	0.983934	0.615311	2.57617	0.224095	0.0762478	2.68856	2.08438	0.637175
ENSG00000177452	0	0	0	0	0	0	0	0	0	0	0	0	0	0	0	0	0	0	0	0	0	0	0	0	0	0	0	0	0	0	NA
ENSG00000228056	0	0	0	0	0	0	0	0	0	0	0	0	0	0	0	0	0	0	0	0	0	0	0	0	0	0	0	0	0	0	NA
ENSG00000207190	0	0	0	0	0	0	0	0	0	0	0	0	0	0	0	0	0	0	0	0	0	0	0	0	0	0	0	0	0	0	NA
ENSG00000200508	0	0	0	0	0	0	0	0	0	0	0	0	0	0	0	0	0	0	0	0	0	0	0	0	0	0	0	0	0	0	NA
ENSG00000223949	0	0	0	0	0	0	0	0	0	0	0	0	0	0	0	0	0	0	0	0	0	0	0	0	0	0	2.62938	0	0	0	1
ENSG00000177414	0	0	0	0	0	0	0	0	0	0	0	0	0	0	0	0	0	0	0	0	0	0	0	0	0	0	5.37159	0	0	0	1
ENSG00000238653	0	0	0	0	0	0	0	0	0	0	0	0	0	0	0	0	0	0	0	0	0	0	0	0	0	0	0	0	0	0	NA
ENSG00000158966	4.33047	4.02161	3.24409	3.70654	3.24472	4.54037	0	3.70708	4.6207	2.34215	2.98418	4.58256	1.46928	2.24998	0.0922515	3.60652	3.14745	1.35552	3.12807	5.09713	2.13295	4.23993	4.08416	2.55029	3.0725	3.12852	2.54589	3.90667	4.83339	4.55752	0.381496
ENSG00000264470	0	0	0	0	0	0	0	0	0	0	0	0	0	0	0	0	0	0	0	0	0	0	0	0	0	0	0	0	0	0	NA
ENSG00000162437	2.78652	3.30124	3.85334	3.56244	3.32434	3.04653	0	2.84582	3.55034	4.01555	3.57615	3.6244	2.80543	2.38589	0	3.60272	4.16505	2.96349	2.58919	3.29946	1.92817	4.32518	3.83125	3.83524	2.55292	3.00946	2.15461	3.39537	3.62971	3.68193	0.303864
ENSG00000162434	6.83747	5.47564	6.42869	6.59601	4.99079	6.62629	6.15248	6.54582	6.67787	5.93413	5.82162	6.22063	5.01742	5.3654	4.59459	6.80292	5.61385	5.90672	6.13282	6.67536	4.74092	5.93436	5.6674	6.23068	6.6883	5.49552	5.66381	6.24176	6.53068	6.18922	0.127718
ENSG00000234784	0	0	0	0	0	0	0	0	0	0	0	0	0	0	0	0	0	0	0	0	0	0	0	0	0	0	0	0	0	0	NA
ENSG00000233877	0	0	0	0	0	0	0	0	0	0	0	0	0	0	0	0	0	0	0	0	0	0	0	0	0	0	0	0	0	0	NA
ENSG00000226891	0	0	0.365869	0.418735	0	0.35616	0	0	0.564835	0	0	0.870863	0	0	0	0	0	0	0.860993	1.90894	0	0.227481	0.326181	0	0	0	1.47106	1.10187	1.16313	0.253242	0.855844
ENSG00000185031	0	0	0	0	0	0	0	0	0.0105481	0	0	0.0718999	0	0	0	0	0	0	0	1.03069	0	0	0	0	0	0	0	0.263536	0.199725	0	0.981743
ENSG00000272506	0	0	0	0	0	0.000480337	0	0	0.373307	0	0	0.548747	0	0	0	0	0	0	0.764245	1.56916	0	0.457916	0.288876	0	0.441341	0	0.439967	0.509857	1.17604	0.0439762	0.88914
ENSG00000212257	0	0	0	0	0	0	0	0	0	0	0	0	0	0	0	0	0	0	0	0	0	0	0	0	0	0	0	0	0	0	NA
ENSG00000265996	0	0	0	0	0	0	0	0	0	0	0	0.0274776	0	0	0	0	0	0	0	0	0	0	0	0	0	0	0	0	0	0	1
ENSG00000199135	0	0	0	0	0	0	0	0	0	0	0	0	0	0	0	0	0	0	0	0	0	0	0	0	0	0	0	0	0	0	NA
ENSG00000231485	0	0	0.494315	0	0	0	0	0	0	0	0	0	0	0	0	0	0	0	0	1.10243	0	0	0	0	0	0	0	0	0.550828	0	0.967309
ENSG00000235804	0	0	0	0	0	0	0	0	0	0	0	0	0	0	0	0	0	0	0	0	0	0	0	0	0	0	0	0	0	0	NA
ENSG00000234496	0	0	0	0	0	0	0	0	0	0	0	0	0	0	0	0	0	0	0	0	0	0	0	0	0	0	0	0	0	0	NA
ENSG00000162433	4.05774	0	4.80471	4.59463	4.06046	3.96914	3.19652	4.60464	2.84989	4.21026	4.50622	3.36599	3.97256	5.59914	4.55196	1.60189	3.22615	0	3.10447	2.38187	0	2.59918	4.00602	2.84574	0.172779	3.97146	3.76129	1.87407	3.41136	3.6734	0.449581
ENSG00000231622	0	0	0	0	0	0	0	0	0	0	0	0	0	0	0	0	0	0	0	0	0	0	0	0	0	0	0	0	0	0	NA
ENSG00000116675	1.07078	2.75937	1.15495	1.01604	5.70998	0.876266	0	0.992776	0.349437	1.44258	0.375229	0.000473951	1.49664	1.41492	0	1.40759	0.0500201	0	2.97642	0	0	4.42875	0.112715	0.396983	0.884438	0.847457	1.16394	0.660391	0	0.657853	0.839748
ENSG00000229294	0	0	0	0	0	0	0	0	0	0	0	0	0	0	0	0	0	0	0	0	0	0	0	0	0	0	1.74827	0	0	0	1
ENSG00000234144	0	0	0	0	0	0	0	0	0	0	0	0	0	0	0	0	0	0	0	0	0	0.298738	0	0	0	0	1.76134	0	0	0	0.994151
ENSG00000222624	0	0	0	0	0	0	0	0	0	0	0	0	0	0	0	0	0	0	0	0	0	0	0	0	0	0	0	0	0	0	NA
ENSG00000116678	3.50643	0.693116	3.30367	2.22457	0.991835	3.96708	0	2.74696	3.23248	2.09753	2.26254	2.92065	1.19792	1.25128	3.9591	3.98458	3.26288	0	4.84424	4.27213	0	3.68176	2.67118	1.91182	0.259457	3.13994	0.866705	3.62435	3.74413	2.44887	0.514369
ENSG00000213625	6.41418	6.02275	6.5164	6.23851	4.15351	6.38121	4.1898	6.01025	6.4775	5.56284	5.57841	6.20574	4.49537	5.60788	4.38282	6.33495	5.7074	4.02805	6.27681	6.46138	4.41483	5.15753	5.55922	5.30403	5.54042	5.29238	4.76333	6.27382	6.49009	5.95125	0.146577
ENSG00000237852	0	0	0	0	0	0	0	0	0	0	0	0	0	0	0	0	0	0	0	0	0	0	0	0	0	0	0	0	0	0	NA
ENSG00000238931	0	0	0	0	0	0	0	0	0	0	0	0	0	0	0	0	0	0	0	0	0	0	0	0	0	0	0	0	0	0	NA
ENSG00000224570	0	0	0	0	0	0	0	0	0	0	0	0	0	0	0	0	0	0	0	0	0	0	0	0	0	0	0	0	0	0	NA
ENSG00000239319	0	0	0	0	0	0	0	0	0	0	0	0	0	0	0	0	0	0	0	0	0	0	0	0	0	0	0	0	0	0	NA
ENSG00000184588	3.64853	0.773242	3.59849	2.25322	4.02118	4.13371	3.49573	2.99425	3.06527	1.95339	1.7394	2.4634	2.85898	1.67313	0.77974	4.03028	3.23281	4.02178	3.04116	1.19248	0	2.07518	3.8784	3.47672	4.22026	1.58094	1.78481	3.10317	1.74777	2.47225	0.386463
ENSG00000227466	0	0	0	0	0	0	0	0	0	0	0	0	0	0	0	0	0	0	0	0	0	0	0	0	0	0	0.351716	0	0	0	1
ENSG00000223152	0	0	0	0	0	0	0	0	0	0	0	0	0	0	0	0	0	0	0	0	0	0	0	0	0	0	0	0	0	0	NA
ENSG00000118473	2.18829	0	4.25434	0.0281962	3.46441	1.21252	0	1.32681	2.94458	1.07297	1.89078	1.7038	0.783292	2.2712	0	2.99924	0.307173	0	1.62301	0.822839	0	2.8667	2.52887	0.678224	0	1.04335	2.14916	3.17477	2.79193	2.58545	0.655868
ENSG00000264720	0	0	0	0	0	0	0	0	0	0	0	0	0	0	0	0	0	0	0	0	0	0	0	0	0	0	0	0	0	0	NA
ENSG00000248458	0	0	0.765146	0	0	0	0	0	0	0	0	0	0	0	0	0.150351	0	0	0	0	0	0	0	0	0	0	0	0	0	0	0.993224
ENSG00000221655	0	0	0	0	0	0	0	0	0	0	0	0	0	0	0	0	0	0	0	0	0	0	0	0	0	0	0	0	0	0	NA
ENSG00000152760	1.28091	0	0	0.148609	2.07414	1.23829	0	0.972547	1.38	0.585827	0.523729	4.46721	0.584067	0	0.912578	2.775	0	0	1.59172	0	0	0.911626	0.642682	0.0774925	0	0	0	0.379136	0.57224	1.01435	0.863643
ENSG00000172410	0	0	0	0	0	0	0	0	0	1.19901	0	0	0	0	0	0	0	0	0	0	0	0	0	0	0	0	0	0	0	0	1
ENSG00000152763	0	0.158802	0.656828	0	0	0.571277	0	0	1.32747	0.514826	0	3.55708	0	0.782582	0	1.51165	0	0	1.46911	0.994553	0	1.3604	0.303957	0	0	0	3.90984	1.92254	0.724755	0	0.86016
ENSG00000231080	0	0	0	0	0	0	0	0	0	0	0	0	0	0	0	0	0	0	0	0	0	0	0	0	0	0	0	0	0	0	NA
ENSG00000198160	3.85283	3.54177	4.30447	3.78755	2.64666	3.75448	3.69081	3.64271	4.15471	3.87778	3.53295	3.89156	1.95163	2.60171	2.5987	4.00763	3.07104	2.04193	3.97947	4.17549	1.79548	3.23792	3.65187	3.55932	3.57471	3.12747	3.9298	3.72869	4.21958	3.92931	0.202468
ENSG00000116704	2.86018	3.16518	3.51667	3.63181	2.1304	2.76431	2.10301	3.75632	3.93685	3.89368	2.97925	3.34422	1.49546	2.33645	4.72785	2.88424	2.54595	2.60466	3.16227	3.7196	2.3954	3.52112	3.35291	3.97133	2.814	3.39953	3.4123	3.48137	3.67557	3.79787	0.338827
ENSG00000203963	0	0	0	0	0	0	0	0	0	0	0	1.79099	0	0	0	0	0	0	0	0	0	0	0	0	0	0	3.74431	0	0	0	0.983506
ENSG00000252433	0	0	0	0	0	0	0	0	0	0	0	0	0	0	0	0	0	0	0	0	0	0	0	0	0	0	0	0	0	0	NA
ENSG00000162594	0	0	0	0	0	0	0.234207	0	0	0	0	0	0	0	0	0	0	0	0	0	0	0	0	0	0	0	0.52607	0	0	0	0.984648
ENSG00000253074	0	0	0	0	0	0	0	0	0	0	0	0	0	0	0	0	0	0	0	0	0	0	0	0	0	0	0	0	0	0	NA
ENSG00000221733	0	0	0	0	0	0	0	0	0	0	0	0	0	0	0	0	0	0	0	0	0	0	0	0	0	0	0	0	0	0	NA
ENSG00000252116	0	0	0	0	0	0	0	0	0	0	0	0	0	0	0	0	0	0	0	0	0	0	0	0	0	0	0	0	0	0	NA
ENSG00000228523	0	0	0	0	0	0	0	0	0	0	0	0	0	0	0	0	0	0	0	0	0	0	0	0	0	0	0	0	0	0	NA
ENSG00000081985	0.186707	0	0	0	0	0	1.9017	0	0	0	0	0	0	0	0	0	0	1.61196	0	0	0.944937	0	0	0	0.463847	0	1.14092	0	0	0	0.921153
ENSG00000142864	6.23176	5.44329	6.23935	6.06372	4.73598	6.24399	6.07321	6.70478	6.38353	5.82086	6.23649	6.11535	4.67237	5.09717	4.92856	5.94128	5.83185	6.16591	6.19136	6.19419	5.02464	5.20163	5.79996	5.58603	5.64665	5.54971	5.8821	6.03328	6.2742	6.46557	0.135594
ENSG00000223263	0	0	0	0	0	0	0	0	0	0	0	0	0	0	0	0	0	0	0	0	0	0	0	0	0	0	0	0	0	0	NA
ENSG00000235200	0	0	0	0	0	0	0	0	0	0	0	0	0	2.72009	5.41502	0	0	0	0	0	0	0	0	0	0	0	0	0	0	0	0.982678
ENSG00000207504	0	0	0	0	0	0	0	0	0	0	0	0	0	0	0	0	0	0	0	0	0	0	0	0	0	0	0	0	0	0	NA
ENSG00000238139	0	0	0	0	0	0	0	0	0	0	0	0	0	0	0	0	0	0	0	0	0	0	0	0	0	0	0	0	0	0	NA
ENSG00000242482	0	0	0	0	0	0	0	0	0	0	0	0	0	0	0	0	0	0	0	0	0	0	0	0	0	0	0	0	0	0	NA
ENSG00000232048	0	0	0	0	0	0	0	0	0	0	0	0	0	0	0	0	0	0	0	0	0	0	0	0	0	0	0	0	0	0	NA
ENSG00000116717	7.15718	4.06427	7.97237	6.0882	4.61344	6.84414	5.82154	6.32925	6.44264	4.898	5.33125	5.95273	4.90942	6.77422	5.58961	6.72406	5.44321	7.18702	6.59113	6.26262	3.10118	4.84809	5.25604	5.23479	5.21949	5.58442	4.63892	6.34615	6.62541	6.05299	0.2823
ENSG00000172380	6.41137	5.84538	7.12445	6.3068	3.41606	6.16661	0	6.89925	6.69141	5.58019	6.28414	6.402	4.11323	5.52911	3.98707	5.90104	5.47198	3.44189	6.20318	5.97642	3.85596	4.70497	5.62313	6.17391	5.39722	5.51957	4.27253	6.10016	6.61526	6.56579	0.247586
ENSG00000238778	0	0	0	0	0	0	0	0	0	0	0	0	0	0	0	0	0	0	0	0	0	0	0	0	0	0	0	0	0	0	NA
ENSG00000232284	0	0	0	0	0	0	0	0	0	0	0	0	0	0	0	0	0	0	0	0	0	0	0	0	0	0	1.50694	0	0	0	1
ENSG00000235055	0	0	0	0	0	0	0	0	0	0	0	0	0	0	0	0	0	0	0	0	0	0	0	0	0	0	0	0	0	0	NA
ENSG00000162595	1.01365	4.19382	2.4974	2.28042	4.76513	2.3596	0	2.73494	3.57472	2.27043	2.64363	3.00167	2.82204	2.49502	1.6566	2.32912	1.82134	0	2.6485	6.40522	3.70885	6.70628	2.64665	1.36113	1.89337	2.38871	1.5943	2.41469	2.70131	3.95027	0.618615
ENSG00000228431	0	0	0	0	0	0	0	0	0	0	0	0	0	0	0	0	0	0	0	0	0	0	0	0	0	0	0	0	0	0	NA
ENSG00000263542	0	0	0	0	0	0	0	0	0	0	0	0	0	0	0	0	0	0	0	0	0	0	0	0	0	0	0	0	0	0	NA
ENSG00000116729	4.67016	4.88027	5.13681	6.4285	4.83258	5.07378	3.84001	5.61236	5.62216	5.9888	6.45149	5.41578	4.12485	4.68132	2.51358	5.41111	4.95036	2.2196	5.34559	6.18706	4.56979	4.4666	5.39131	5.04665	4.38363	5.56249	4.3427	4.57297	5.20025	5.56181	0.240844
ENSG00000234383	0	0	0	0	0	0	0	0	0	0	0.336516	0	0	0	0	0	0	0	0	0.743121	0	0	0.124055	0	0	0	0.882489	0	0	0	0.952966
ENSG00000221203	0	0	0	0	0	0	0	0	0	0	0	0	0	0	0	0	0	0	0	0	0	0	0	0	0	0	0	0	0	0	NA
ENSG00000229133	0	0	0	0	0	0	0	0	0	0	0	0	0	0	0	0	0	0	0	0	0	0	0	0	0	0	0	0	0	0	NA
ENSG00000225242	0	0	0	0	0	0	0	0	0	0	0	0	0	0	0	0	0	0	0	0	0	0	0	0	0	0	0	0	0	0	NA
ENSG00000237622	0	0	0	0	0	0	0	0	0	0	0	0	0	0	0	0	0	0	0	0	0	0	0	0	0	0	0	0	0	0	NA
ENSG00000229440	0	0	0	0	0	0	0	0	0	0	0	0	0	0	0	0	0	0	0	0	0	0	0	0	0	0	0	0	0	0	NA
ENSG00000116745	0	0	0	0	0	0	0	0	0	0	0	0	0	0	0	0	0	0	0	0	0	0	0.465721	0	0	0	0	0	0	0	1
ENSG00000024526	0	0	0	0	0	0	1.76825	2.06001	0	0	0.731769	0	0	0	0	0	0	0	0	0	0	0	0	0.393358	0.0703792	0	3.50895	0	0	0.592293	0.94481
ENSG00000233589	0	0	0	0	0	0	0	0	0	0	0	0	0	0	0	0	0	0	0	0	0	0	0	0	0	0	0	0	0	0	NA
ENSG00000234264	0	0	0	0	0	0	0	0	0	0	0	0	0	0	0	0	0	0	0	0	0	0	0	0	0	0	0	0	0	0	NA
ENSG00000225167	0	0	0	0	0	0	0	0	0	0	0	0	0	0	0	0	0	0	0	0	0	0	0	0	0	0	0	0	0	0	NA
ENSG00000223883	0	0	0	0	0	0	0	0	0	0	0	0	0	0	0	0	0	0	0	0	0	0	0	0	0	0	0.940724	0	0	0	1
ENSG00000235446	0	0	0	0	0	0	0	0	0	0	0	0	0	0	0	0	0	0	0	0	0	0	0	0	0	0	1.11976	0	0	0	1
ENSG00000229639	0	0	0	0	0	0	0	0	0	0	0	0	0	0	0	0	0	0	0	0	0	0	0	0	0	0	0	0	0	0	NA
ENSG00000033122	0	0	0	0	2.45119	0	0	0	0	0	0	0	0	0	0	0	0	0	2.308	0	0	0	0	0	0	0	1.21143	1.53534	0	0	0.928891
ENSG00000270615	0	0	0	0	0	0	0	0	0	0	0	0	0	0	0	0	0	0	0	0	0	0	0	0	0	0	0	0	0	0	NA
ENSG00000240692	0	0	0	0	0	0	0	0	0	0	0	0	0	0	0	0	0	0	0	0	0	0	0	0	0	0	0	0	0	0	NA
ENSG00000229359	0	0	0	0	0	0	0	0	0	0	0	0	0	0	0	0	0	0	0	0	0	0	0	0	0	0	0.560583	0	0	0	1
ENSG00000237919	0	0	0	0	0	0	0	0	0	0	0	0	0	0	0	0	0	0	0	0	0	0	0	0	0	0	2.95902	0	0	0	1
ENSG00000066557	3.68784	3.10486	3.66974	3.50435	3.58077	3.66068	3.21371	3.61858	3.54483	3.36874	3.41328	3.6252	2.36873	2.73992	3.03067	3.52873	3.08577	2.4953	3.95917	3.77432	1.90443	2.9712	3.25951	3.54229	3.39949	2.90434	3.75822	3.51806	3.9469	3.57177	0.16569
ENSG00000244389	0	0	0	0	0	0	0	0	0	0	0	0	0	0	0	0	0	0	0	0	0	0	0	0	0	0	0	0	0	0	NA
ENSG00000116754	6.68527	5.89242	6.75946	6.78611	5.68081	6.90229	5.33955	6.622	6.97504	6.5	6.40223	7.07376	4.6941	5.58552	5.47273	6.73463	6.39309	5.28444	7.36105	7.28322	5.51877	6.71726	6.73273	6.75778	6.77615	6.2103	6.56756	7.21411	7.33713	6.85726	0.12983
ENSG00000228988	0	0	0	0	0	0	0	0	0	0	0	0	0	0	0	0	0	0	0	0	0	0	0	0	0	0	0	0	0	0	NA
ENSG00000118454	3.83517	3.30011	3.90626	3.70759	3.63368	3.8011	2.61456	3.97932	3.97285	3.56776	3.54718	3.83535	2.09144	2.70132	2.07359	3.78911	3.37088	2.92842	4.37855	4.18939	2.16051	3.2473	3.69473	3.39297	3.38492	3.17224	2.86525	3.82563	4.13115	3.81435	0.224006
ENSG00000197568	3.08533	4.38073	3.61311	3.72101	4.04385	3.39686	2.48464	3.31608	3.79945	3.14245	3.38118	3.82069	1.86808	3.6055	3.34532	3.18723	3.10661	0.872109	4.04164	4.44658	2.37535	4.41162	3.96846	2.77612	3.43668	2.79954	3.86814	4.29412	3.95577	3.57281	0.242576
ENSG00000226088	0	0	0	0	0	0	0	0	0	0	0	0	0	0	0	0	0	0	0	0.023258	0	0	0	0	0	0	3.99694	0	0	0	0.999799
ENSG00000116761	2.35841	3.1401	3.0757	1.98076	1.92181	2.06953	2.41667	1.97722	2.60424	1.74892	2.0375	3.02968	0.599435	2.27872	5.95735	2.55896	1.65706	1.26127	3.35362	5.98644	2.70068	2.34218	2.65396	1.54376	0.776462	3.00384	3.124	3.69033	2.63308	1.80481	0.595062
ENSG00000271992	0	0.169929	0.416334	0	0.800665	0	0	0	0.631041	0	0	0.95923	0	0.35539	4.22772	0.230112	0	0	1.3538	2.72129	0.559583	0.278299	0.866169	0	0	0.96059	0.351448	1.59231	1.05033	0	0.891549
ENSG00000233020	0	0	0	0	0	0	0	0	0	0	0	0	0	0	0	0	0	0	0	0	0	0	0	0	0	0	0	0	0	0	NA
ENSG00000237033	0	0	0	0	0	0	0	0	0	0	0	0	0	0	0	0	0	0	0	0	0	0	0	0	0	0	0	0	0	0	NA
ENSG00000229051	0	0	0	0	0	0	0	0	0	0	0	0	0	1.13485	0	0	0	0	0	0	0	0	0	0	0	0	0	0	0	0	1
ENSG00000226208	0	0	0	0	0	0	0	0	0	0	0	0	0	0	0	0	0	0	0	0	0	0	0	0	0	0	1.02146	0	0	0	1
ENSG00000050628	4.62913	1.32584	4.09152	2.49579	0	4.21339	0	2.80137	1.54482	2.93034	1.46477	3.17841	0	4.31635	0	0	2.07777	0	0.754807	0.592676	0.576457	0	1.18003	1.32912	0	3.60366	0	0.110844	6.34576	2.54924	0.751306
ENSG00000235782	0.523508	0	0	0	0	0.0685925	0	0	0	0	0	0	0	0.115572	0	0	0	0	0	0	0	0	0	0	0	0	0	0	0	0	0.987869
ENSG00000269933	1.63311	0	1.41656	0	0	1.31433	0	0	0	0.731077	0	1.19689	0	2.69789	0	0	0	0	0	0	0	0	0	0	0	1.26456	0	0	4.49677	0.556362	0.917099
ENSG00000235079	0	0	0	0	0	0	0	0	0	0	0	0.00481468	0	0	0	0	0	0	0	0	0	0	0	0.256028	0	0	0	0	0	0	0.999352
ENSG00000132485	6.00082	5.27143	6.66997	6.2941	5.70512	6.38375	5.11764	5.96311	6.71109	6.25622	6.03198	6.80537	4.78856	5.27822	4.42805	6.4176	5.93506	5.08557	7.07906	7.14503	4.92889	7.15643	6.5356	6.14494	6.20694	5.69019	6.23719	6.94056	7.3823	6.56308	0.17897
ENSG00000207721	0	0	0.0173625	0	0	0	0	0	0.345386	0	0	0.737514	0	0	0	0	0	0	0.0331134	0.97505	0	0	0	0	0	0	0	0.12225	0.788946	0	0.927694
ENSG00000229956	0	0	0	0	0	0	0	0	0	0	0	0	0	0	0	0	0	0	0	0	0	0	0	0	0	0	0.176661	0	0	0	1
ENSG00000264239	0	0	0	0	0	0	0	0	0	0	0	0	0	0	0	0	0	0	0	0	0	0	0	0	0	0	0	0	0	0	NA
ENSG00000237726	0	0	0	0	0	0	0	0	0	0	0	0	0	0	0	0	0	0	0	0	0	0	0	0	0	0	0	0	0	0	NA
ENSG00000226324	0	0	0	0	0	0	0	0	0	0	0	0	0	0	0	0	0	0	0	0	0	0	0	0	0	0	0	0	0	0	NA
ENSG00000172260	3.84932	0	3.64718	3.65802	3.56545	2.47237	0	3.00012	3.11011	3.61027	3.20605	2.8548	1.82776	1.20115	0	2.54981	1.05592	0.52885	4.71525	1.95193	0	2.19071	2.24055	2.1248	0	2.48274	1.05263	2.08235	2.96441	2.83	0.560799
ENSG00000231985	0	0	0	0	0	0	0	0	0	0	0	0	0	0	0	0	0	0	0	0	0	0	0	0	0	0	0	0	0	0	NA
ENSG00000271618	0	0	0	0	0	0	0	0	0	0	0	0	0	0	0	0	0	0	0	0	0	0	0	0	0	0	0	0	0	0	NA
ENSG00000228853	0	0	0	0	0	0	0	0	0	0	0	0	0	0	0	0	0	0	0	0	0	0	0	0	0	0	0	0	0	0	NA
ENSG00000233994	0	0	0	0	0	0	0	0	0	0	0	0	0	0	0	0	0	0	0	0	0	0	0	0	0	0	0	0	0	0	NA
ENSG00000227207	0	0	0	0	0	0	0	0	0	0	0	0	0	0	0	0	0	0	0	0	0	0	0	0	0	0	0	0	0	0	NA
ENSG00000212366	0	0	0	0	0	0	0	0	0	0	0	0	0	0	0	0	0	0	0	0	0	0	0	0	0	0	0	0	0	0	NA
ENSG00000225087	0	0	0	1.01434	0	0	0	0	0	0	0	0	0	0	0	0	0	0	0	0	0	0	0.674002	0	0	0	1.47233	0	0	0	0.960458
ENSG00000227016	0	0	0	0	0	0	0	0	0	0	0	0	0	0	0	0	0	0	0	0	0	0	0	0	0	0	0.59048	0	0	0	1
ENSG00000229636	0	0	0	0	0	0	0	0	0	0	0	0	0	0	0	0	0	0	0	0	0	0	0	0	0	0	0	0	0	0	NA
ENSG00000251825	0	0	0	0	0	0	0	0	0	0	0	0	0	0	0	0	0	0	0	0	0	0	0	0	0	0	0	0	0	0	NA
ENSG00000233973	0	0	0	0	0	0	0	0	0	0	0	0	0	0	0	0	0	0	0	0	0	0	0	0	0	0	0.76474	0	0	0	1
ENSG00000223479	0	0	0	0	0	0	0	0	0	0	0	0	0	0	0	0	0	0	0	0	0	0	0	0	0	0	0	0	0	0	NA
ENSG00000200601	0	0	0	0	0	0	0	0	0	0	0	0	0	0	0	0	0	0	0	0	0	0	0	0	0	0	0	0	0	0	NA
ENSG00000252005	0	0	0	0	0	0	0	0	0	0	0	0	0	0	0	0	0	0	0	0	0	0	0	0	0	0	0	0	0	0	NA
ENSG00000162620	0	0	0	0	0	0	0	0	0	0	0	0	0	0	0	0	0	0	0	0	0	0	0	0	0	0	3.62535	0	0	0	1
ENSG00000254685	3.03524	2.88906	3.10724	3.12553	1.53356	3.07935	2.05276	3.06353	3.18096	2.77777	2.78476	3.1912	1.90231	2.42269	1.95591	2.75395	2.93572	1.37406	3.60589	3.43268	1.91849	3.0098	2.95491	2.73422	2.91739	2.54337	2.95256	3.4592	3.29994	3.21825	0.238733
ENSG00000116783	1.23571	0.636435	1.81337	1.21903	2.28941	1.19605	0	0.692171	1.00671	1.31331	1.0361	1.60047	4.34513	0.209954	0	0.79389	0.1669	0.470971	2.89425	1.69725	0	1.71313	0.81864	0.274177	0.718146	0.58308	2.60431	1.11219	1.75413	1.13479	0.754108
ENSG00000237324	0	0	0	0	0	0	0	0	0	0	0	0	0	0	0	0	0	0	0	0	0	0	0	0	0	0	0	0	0	0	NA
ENSG00000233894	0	0	0	0	0	0	0	0	0	0	0	0	0	0	0	0	0	0	0	0	0	0	0	0	0	0	4.05498	0	0	0	1
ENSG00000162621	0	0	0	0	0	0	0	0	0	0	0	0	0	0	0	0	0	0	0	0	0	0	0	0	0	0	0	0	0	0	NA
ENSG00000178965	0	0.296141	0	0	3.11958	0.351672	0	0	1.20468	0	0	4.03264	0	0	0	2.06954	0	0	0	0	0	2.84896	0	0	0	0	4.77908	0	0	0	0.899539
ENSG00000234497	0	0	0	0	0	0	0	0	0	0	0	0	0	0	0	0	0	0	0	0	0	0	0	0	0	0	3.10297	0	0	0	1
ENSG00000272864	0.842146	0.722698	1.69021	2.30539	1.19486	1.11849	0	0.236542	2.80777	2.02921	1.83349	2.95145	0.133711	1.98968	2.10558	0.703609	0	0	2.48383	3.08755	1.51321	2.65285	2.98105	1.3158	1.37974	1.51285	1.20191	2.10437	3.34244	2.79673	0.528584
ENSG00000116791	3.91458	4.59917	4.69092	5.30318	2.83592	4.0888	4.50138	4.00601	4.78944	4.01213	4.32924	4.97026	3.43083	6.01729	5.81424	4.17733	3.68621	2.48998	4.37302	4.68293	4.65091	4.36918	4.71308	4.38783	3.69601	4.22734	3.02325	4.83843	5.27516	4.79945	0.285529
ENSG00000162623	3.73403	3.75196	4.3443	4.37725	3.16621	3.82181	3.34181	3.61813	4.13222	3.93527	3.9706	4.29981	2.85587	3.17373	2.42984	3.59751	3.41093	2.1772	4.22541	4.51475	2.40002	3.97936	4.04327	3.38854	3.61987	3.51183	3.59834	4.16158	4.54379	3.87154	0.199718
ENSG00000229943	0	0	0	0	0	0	0	0	0	0	0	0	0	0	0	0	0	0	0	0	0	0	0	0	0	0	0	0	0	0	NA
ENSG00000261213	0	0	0	0	0	0	0	0	0	0	0	0	0	0	0	0	0	0	0	0	0	0	0	0	0	0	0	0	0	0	NA
ENSG00000224127	0	0	0	0	0	0	0	0	0	0	0	0	0	0	0	0	0	0	0	0	0	0	0	0	0	0	0	0	0	0	NA
ENSG00000162624	0	0	0	0	0	0	0	0	0	0	0	0	0	0	0	0	2.19028	0	0	0	0	0	0	0	0	0	0.610091	0	0	0	0.990395
ENSG00000224149	0	0	0	0	0	0	0	0	0	0	0	0	0	0	0	0	0	0	0	0	0	0	0	0	0	0	0	0	0	0	NA
ENSG00000206999	0	0	0	0	0	0	0	0	0	0	0	0	0	0	0	0	0	0	0	0	0	0	0	0	0	0	0	0	0	0	NA
ENSG00000137968	0	0	0	1.79379	0.460123	0.441515	0	2.36136	0.440237	0	1.617	0.820579	0	0.320137	0	0	0.927588	0	0	0.458143	0	2.22956	0	0	0	0	2.55586	0.367061	0	1.49677	0.814707
ENSG00000224493	0	0	0	0	0	0	0	0	0	0	0	0	0	0	0	0	0	0	0	0	0	0	0	0	0	0	0	0	0	0	NA
ENSG00000252338	0	0	0	0	0	0	0	0	0	0	0	0	0	0	0	0	0	0	0	0	0	0	0	0	0	0	0	0	0	0	NA
ENSG00000213579	0	0	0	0	0	0	0	0	0	0	0	0	0	0	0	0	0	0	0	0	0	0	0	0	0	0	0	0	0	0	NA
ENSG00000230863	0	0	0	0	0	0	0	0	0	0	0	0	0	0	0	0	0	0	0	0	0	0	0	0	0	0	1.16735	0	0	0	1
ENSG00000178193	0	0	0	0	0	0	0	0	0	0	0	0	0	0	0	0	0	0	0	0	0	0	0	0	0	0	0.424983	0	0	0	1
ENSG00000117054	4.99203	5.95993	5.09944	5.13029	4.78955	5.02602	5.25826	4.30888	4.84385	5.05789	5.2993	4.76561	5.95004	5.70895	5.9012	4.45991	4.80253	6.59865	4.9998	5.26255	3.97322	5.0468	4.5254	5.07915	4.92328	4.85617	5.19412	5.08919	4.89101	5.16667	0.235157
ENSG00000181227	0.322124	0.647047	0.337188	1.04751	0.0105763	0.736006	0.133377	0.196496	0.811411	0.463548	0.537118	1.39647	0	0.0393094	0.338828	0.415278	0.563429	0	0.945348	1.66875	0.369837	0.791907	0.350558	1.17465	1.10977	0.125851	0.533946	1.11516	1.10792	0.66879	0.663398
ENSG00000137955	4.89925	4.89471	4.73284	4.73281	3.86811	5.02781	4.10259	4.84262	5.03234	4.55671	4.58817	4.9177	3.82916	4.24674	4.10952	5.41576	4.66052	4.57516	5.11155	5.21384	4.28619	4.56204	4.68729	4.87793	5.1361	4.42541	3.8088	4.91461	4.90799	4.98258	0.143425
ENSG00000057468	0	0	0	0	0	0	0	0	0	0	0	0	0	0	0	0	0	0	0.92694	0.470227	0	0	0	0	0	0	2.63508	0	0.443373	0	0.975915
ENSG00000266832	0	0	0	0	0	0	0	0	0	0	0	0	0	0	0	0	0	0	0	0	0	0	0	0	0	0	0	0	0	0	NA
ENSG00000154007	0	0	0	0	0	0	0	0	0	0	0	0	0	0	0	0	0	0	0	0	0	0	0	0	0	0	6.27721	0	0	0	1
ENSG00000225605	0	0	0	0	0	0	0	0	0	0	0	0	0	0	0	0	0	0	0	0	0	0	0	0	0	0	3.79694	0	0	0	1
ENSG00000230027	0	0	0	0	0	0	0	0	0	0	0	0	0	3.17141	0	0	0	0	0	0	0	0	0	0	0	0	1.92638	0	0	0	0.979054
ENSG00000184005	2.9709	0.480008	1.10471	1.05042	1.5555	2.85583	1.26109	0	1.51507	1.07542	0.836869	1.80772	0.769482	2.11816	0	2.94146	0.231739	0	2.25164	0.849034	0	1.81234	0.764103	0.739799	1.02795	0.63291	0	3.37517	2.44042	1.24233	0.649214
ENSG00000223905	0	0	0	0	0	0	0	0	0	0	0	0	0	0	0	0	0	0	0	0	0	0	0	0	0	0	0	0	0	0	NA
ENSG00000272855	0	0	0	0	0	0	0	0	0	0	0	0	0	0	0	0	0	0	0	0	0	0	0	0	0	0	0	0	0	0	NA
ENSG00000226415	1.11394	1.54158	1.5092	0.927924	1.29633	0.98546	2.21629	1.7566	0.989139	1.03094	1.40989	0.756877	1.38865	1.0671	0.357903	1.552	1.18709	2.18201	1.3316	0.990058	0	0.638126	0.807213	1.09355	0.67152	0.616318	1.00237	1.35718	0.730709	1.36752	0.507428
ENSG00000264686	0	0	0	0	0	0	0	0	0	0	0	0	0	0	0	0	0	0	0	0	0	0	0	0	0	0	0	0	0	0	NA
ENSG00000199921	0	0	0	0	0	0	0	0	0	0	0	0	0	0	0	0	0	0	0	0	0	0	0	0	0	0	0	0	0	0	NA
ENSG00000237552	0	0	0	0	0	0	0	0	0	0	0	0	0	0	0	0	0	0	0.125115	0	0	0	0	0	0	0	0	0	0	0	1
ENSG00000117069	0	2.60792	2.71007	2.06516	2.74596	1.61844	0	0	0.909162	2.03497	0.966184	1.12889	0	0	0	3.10068	0.437163	0	3.39934	2.26149	0	3.38452	0.761014	1.47672	0	2.08245	0.79187	0	0	1.39315	0.670566
ENSG00000221720	0	0	0	0	0	0	0	0	0	0	0	0	0	0	0	0	0	0	0	0	0	0	0	0	0	0	0	0	0	0	NA
ENSG00000230498	0	0	0	0	0	0	0	0	0	0	0	0	0	0	0	0	0	0	0.152661	0	0	0	0	0	0	0	0	0	0	0	1
ENSG00000142892	3.53947	3.30539	4.488	3.53803	3.10364	3.6704	2.31952	3.66973	3.66307	3.25783	3.00971	3.69808	2.79246	3.08884	2.09172	3.61137	3.16065	2.14445	4.16881	3.63887	2.03285	3.68559	3.16633	2.95463	3.23646	2.92735	2.94519	3.84628	3.7974	3.19389	0.283469
ENSG00000226084	3.09733	2.52897	3.09367	2.59094	1.55207	3.3522	2.23833	3.35586	3.58196	2.84795	2.88227	3.77463	1.5442	2.1269	1.27946	3.07883	2.69438	1.5721	3.14688	4.49047	2.80971	2.81406	3.06471	2.57837	2.82991	2.67736	1.72568	3.32357	3.63926	3.22532	0.393145
ENSG00000228187	0	0	0	0	0	0	0	0	0	0	0	0	0	0	0	0	0	0	0	0	0	0	0	0	0	0	0	0	0	0	NA
ENSG00000154027	0	0	1.67285	0	5.40915	3.4612	0	3.0644	0	0.855418	0.211829	0	0	0	0	0	0	0	4.08766	0	0	1.98449	0.934278	0	0	0	1.75823	0	0	0	0.885058
ENSG00000233099	0	0	0	0	0	0	0	0	0	0	0	0	0	0	0	0	0	0	0	0	0	0	0	0	0	0	0	0	0	0	NA
ENSG00000221664	0	0	0	0	0	0	0	0	0	0	0	0	0	0	0	0	0	0	0	0	0	0	0	0	0	0	0	0	0	0	NA
ENSG00000251767	0	0	0	0	0	0	0	0	0	0	0	0	0	0	0	0	0	0	0	0	0	0	0	0	0	0	0	0	0	0	NA
ENSG00000036549	3.33619	3.17768	3.48792	3.73818	2.45416	3.63888	1.99701	3.86315	3.79302	3.23622	3.14961	3.58522	1.8307	2.54886	2.24356	3.16198	3.07586	2.47329	4.05604	3.84181	2.09927	3.32384	3.43927	2.95511	2.99032	2.78027	2.69297	3.8465	3.93228	3.55432	0.232753
ENSG00000251785	0	0	0	0	0	0	0	0	0	0	0	0	0	0	0	0	0	0	0	0	0	0	0	0	0	0	0	0	0	0	NA
ENSG00000243437	0	0	0	0	0	0	0	0	0	0	0	0	0	0	0	0	0	0	0	0	0	0	0	0	0	0	0	0	0	0	NA
ENSG00000077254	5.44841	5.07595	5.12992	5.08569	5.08023	5.34835	3.81633	5.13368	5.35262	4.66259	4.75949	5.29373	3.38025	4.08411	3.34364	5.14959	4.79511	3.66327	5.39531	5.14662	3.36291	4.99585	4.89541	4.86286	5.02561	4.48111	4.77914	5.19197	5.29987	5.07966	0.128687
ENSG00000232672	0	0	0	0	0	0	0	0	0	0	0	0	0	0	0	0	0	0	0	0	0	0	0	0	0	0	0	0	0	0	NA
ENSG00000180488	3.12079	2.49909	3.31264	3.24284	3.07548	3.08258	1.28561	2.97716	3.0524	2.49408	2.45498	2.91781	1.28264	1.82195	1.00166	2.7376	3.0978	2.57546	3.41822	3.15159	1.43891	2.45366	2.43383	2.52565	1.84982	2.11937	2.46657	3.34942	3.31175	2.81771	0.25399
ENSG00000222849	0	0	0	0	0	0	0	0	0	0	0	0	0	0	0	0	0	0	0	0	0	0	0	0	0	0	0	0	0	0	NA
ENSG00000219201	0	0	0	0	0	0	0	0	0	0	0	0	0	0	0	0	0	0	0	0	0	0	0	0	0	0	0	0	0	0	NA
ENSG00000235613	0	0	0	0	0	0	0	0	0	0	0	0	0	0	0	0	0	0	0	0	0	0	0	0	0	0	0	0	0	0	NA
ENSG00000232015	0	0	0	0	0	0	0	0	0	0	0	0	0	0	0	0	0	0	0	0	0	0	0	0	0	0	0	0	0	0	NA
ENSG00000235927	0	0	0.201837	0	0	0	0	0.0737563	0	0	0	0	0	0	0	0	0	0.633899	0	0	0	0	0	0	0	0	0.824887	0.268302	0.166032	0	0.943824
ENSG00000162614	5.19423	4.34354	7.83648	6.30499	0.640619	4.52635	1.07609	4.98963	5.41318	6.55492	6.87314	6.54659	7.27193	2.68936	1.23497	5.35876	3.85529	8.13142	4.7859	4.66199	2.36472	1.27398	5.91672	5.14662	3.39887	5.73943	3.39683	4.21262	6.78441	5.03846	0.434164
ENSG00000162613	5.40331	5.31476	5.60422	5.5782	4.59914	5.66806	4.95688	5.30984	5.9108	5.26692	5.19555	5.81554	4.18456	4.78755	3.3854	5.87917	5.38824	4.47847	6.09198	6.54971	4.34604	5.93	5.50955	5.45483	5.52728	4.89004	5.11918	6.30408	6.26295	5.80161	0.189413
ENSG00000162616	5.13224	5.41185	5.77298	4.47444	4.06066	4.63283	2.03924	5.35829	4.40061	4.39918	4.82096	4.77851	4.54046	3.5104	3.29865	5.01343	3.47777	4.54202	4.97801	4.99311	3.74146	4.49556	4.30249	3.92939	4.50805	4.02624	4.1004	5.31106	5.36285	4.67787	0.23354
ENSG00000273338	3.25485	1.01959	3.12613	3.31788	0.0641387	3.78835	0.85377	2.34225	3.02303	2.38402	1.82745	3.65234	0.403825	0.487461	0.702602	3.10707	2.61268	0.600515	3.95387	2.67973	0.272427	1.75297	1.30975	2.62963	2.54387	1.66431	1.41655	2.26133	2.37534	3.0761	0.48937
ENSG00000213561	0	1.12791	0	0	0	0	0	0	0	0	0	0	0	0	0	0	0	0	0	0	0.586996	0	0	0	0.141726	0	0	0	0	0	0.977721
ENSG00000137960	2.72044	4.81238	1.34235	1.83073	0	2.68133	0	2.10408	1.76673	2.78039	1.95748	1.76019	0.310658	3.64689	2.93742	1.82876	2.01516	0	1.80068	1.84217	3.72183	1.12865	1.57621	4.31021	4.72992	2.29107	0.587481	1.38387	2.20272	2.09516	0.589044
ENSG00000251958	0	0	0	0	0	0	0	0	0	0	0	0	0	0	0	0	0	0	0	0	0	0	0	0	0	0	0	0	0	0	NA
ENSG00000213560	0	0	0	0	0	0	0	0	0	0	0	0	0	0	0	0	0	0	0	0	0	0	0	0	0	0	0	0	0	0	NA
ENSG00000202263	0	0	0	0	0	0	0	0	0	0	0	0	0	0	0	0	0	0	0	0	0	0	0	0	0	0	0	0	0	0	NA
ENSG00000233333	0	0	0	0	0	0	0	0	0	0	0	0	0	0	0	0	0	0	0	0	0	0	0	0	0	0	0	0	0	0	NA
ENSG00000237413	0	0	0	0	0	0	0	0	0	0	0	0	0	0	0	0.534399	0	0	0	0	0	0	0	0	0	0	0	0	0	0	1
ENSG00000122420	3.68396	2.13061	3.2248	3.71653	0	3.68761	0	4.27026	2.91563	1.67213	2.57608	3.1998	0.0592908	1.13398	0.131954	1.65491	2.99016	1.00285	5.69523	2.45914	0	0	1.75825	1.9384	0	1.44052	0.0885775	1.05607	4.41212	3.4439	0.669127
ENSG00000227556	0	0	0	0	0	0	0	0	0	0	0	0	0	0	0	0	0	0	0	0	0	0	0	0	0	0	0	0	0	0	NA
ENSG00000212308	0	0	0	0	0	0	0	0	0	0	0	0	0	0	0	0	0	0	0	0	0	0	0	0	0	0	0	0	0	0	NA
ENSG00000137959	3.65772	2.56134	2.86392	2.56418	2.74483	3.53924	5.87882	2.59707	2.53874	2.26374	2.62422	2.84662	2.13292	4.15967	0.77659	3.60244	1.94699	0.967347	4.07141	3.44495	0	3.08336	2.18821	2.2812	4.08426	1.74282	2.65312	3.8231	2.93056	2.34107	0.548164
ENSG00000137965	4.99299	4.33753	4.02683	4.12101	3.29633	4.94822	5.55844	3.62698	4.56156	3.74785	3.97348	4.51889	3.33204	5.27364	2.93438	5.55873	3.81715	2.0586	5.53849	4.74398	2.00566	4.80022	4.10406	4.05445	5.89764	3.65073	3.43975	5.18423	4.55399	4.30963	0.29212
ENSG00000238015	0	0	0	0	0	0	0	0	0	0	0	0	0	0	0	0	0	0	0	0	0	0	0	0	0	0	0	0	0	0	NA
ENSG00000221683	0	0	0	0	0	0	0	0	0	0	0	0	0	0	0	0	0	0	0	0	0	0	0	0	0	0	0	0	0	0	NA
ENSG00000235400	0	0	0	0	0	0	0	0	0	0	0	0	0	0	0	0	0	0	0	0	0	0	0	0	0	0	0	0	0	0	NA
ENSG00000162618	6.93549	3.24638	4.4492	4.13942	2.27263	6.7377	0	4.02153	4.70885	3.92444	3.96061	4.59329	3.64376	3.83101	1.70822	5.19608	3.53312	3.34238	5.33761	3.19871	1.6497	3.39983	4.2335	3.66228	5.46831	3.35969	3.31887	5.50731	5.26844	4.40697	0.442548
ENSG00000230787	0.160661	0	0	0	0	0.0582487	0	0	0	0	0	0	0	0	0	0	0	0	0	0	0	0	0	0	0	0	0	0	0	0	0.987498
ENSG00000266388	0	0	0	0	0	0	0	0	0	0	0	0	0	0	0	0	0	0	0	0	0	0	0	0	0	0	0	0	0	0	NA
ENSG00000235011	0	0	0	0	0	0	0	0	0	0	0	0	0	0	0	0	0	0	0	0	0	0	0	0	0	0	3.21291	0	0	0	1
ENSG00000232676	0	0	0	0	0	0	0	0	0	0	0	0	0	0	0	0	0	0	0	0	0	0	0	0	0	0	0	0	0	0	NA
ENSG00000235756	0	0	0	0	0	0	0	0	0	0	0	0	0	0	0	0	0	0	0	0	0	0	0	0	0	0	0	0	0	0	NA
ENSG00000260322	0	0	0	0	0	0	0	0	0	0	0	0	0	0	0	0	0	0	0	0	0	0	0	0	0	0	0	0	0	0	NA
ENSG00000236407	0	0	0	0	0	0	0	0	0	0	0	0	0	0	0	0	0	0	0	0	0	0	0	0	0	0	0	0	0	0	NA
ENSG00000266033	0	0	0	0	0	0	0	0	0	0	0	0	0	0	0	0	0	0	0	0	0	0	0	0	0	0	0	0	0	0	NA
ENSG00000225598	0	0	0	0	0	0	0	0	0	0	0	0	0	0	0	0	0	0	0	0	0	0	0	0	0	0	0	0	0	0	NA
ENSG00000213559	0	0	0	0	0	0	0	0	0	0	0	0	0	0	0	0	0	0	0	0	0	0	0	0	0	0	0	0	0	0	NA
ENSG00000227062	0	0	0	0	0	0	0	0	0	0	0	0	0	0	0	0	0	0	0	0	0	0	0	0	0	0	0	0	0	0	NA
ENSG00000234108	0	0	0	0	0	0	0	0	0	0	0	0	0	0	0	0	0	0	0	0	0	0	0	0	0	0	0	0	0	0	NA
ENSG00000224326	0	0	0	0	0	0	0	0	0	0	0	0	0	0	0	0	0	0	0	0	0	0	0	0	0	0	0	0	0	0	NA
ENSG00000234184	0	0	0	0	0	0	2.12283	0	0	0	0	0	0	1.87833	0	0	0	0	0	0	0	0	0	4.47321	5.3612	0	0	0	0	0	0.945494
ENSG00000227937	0	0	0	0	0	0	0	0	0	0	0	0	0	0	0	0	0	0	0	0	0	0	0	0	0	0	0	0	0	0	NA
[truncated: 54,203 more rows]

## Sheet: TableS2.TauAssociation
Table S2. Average tau scores of genes differentially expressed with age compared to the average tau score of genes not differentially expressed with age for each meta-analysis. 'Gene List' indicates which analysis and which direction of DEG was tested, 'p-value' indicates the result from a chi-squared test using the threshold of tau>0.8 to declare a gene as tissue-specific, 'Bonferroni' is the ad…
Gene List	p-value	Bonferroni	phi	DEG Median	Unchanged Median
All-Over	2.2e-16	1.76e-15	-0.087	0.318024	0.42262
All-Under	8.035e-08	6.428e-07	-0.041	0.251715
Brain-Over	3.234e-08	2.5872e-07	-0.042	0.342662	0.414845
Brain-Under	0.01827	0.14616	0.02	0.826536
Heart-Over	0.008189	0.065512	-0.021	0.334319	0.414463
Heart-Under	1	1	-0.003	0.273846
Muscle-Over	0.08885	0.7108	-0.014	0.381033	0.415246
Muscle-Under	2.299e-05	0.00018392	-0.033	0.274959
