# Supplementary material for: Ageing transcriptome meta-analysis reveals similarities and differences between key mammalian tissues
Source: Aging (Albany NY). 2021 Feb 11;13(3):3313–41. doi: 10.18632/aging.202648 (PMC7906136; doi:10.18632/aging.202648)
Supplement: Supplementary Table 27 [file aging-13-202648-s008.xlsx]

## Sheet: TableS27
Table S27. Gene lists at the intersections of the tissue specific analyses.
Overexpressed					Underexpressed
Global-Brain	Global-Heart	Global-Muscle	Global-Brain-Heart	Global-Brain-Muscle	Global-Brain	Global-Heart	Global-Muscle
C1QA	GPNMB	EFEMP1	GPNMB	EFEMP1	SOX4	FKBP4	UQCRFS1
GPNMB	CP	SKAP2	VAT1	SKAP2	OPCML		SUCLG1
B2M	VAT1	C3	SERPING1	C3	SOX11		MLF1
EFEMP1	SERPING1	PRNP		MGST1	PTPRO		TFRC
C1QC	S100A4	MGST1			PLPPR5		COX7B
C1QB	RPL3	CDKN1A			TTC9B		ATP5G3
SKAP2	F2R	GDA					COL5A1
IL33	MAN1A1	MT1E					DLAT
PLEK	LBP	RNF115					COL1A1
C3	EFHD2	RPS27L					CA4
CD53	SLC6A6	CDC42EP3					RNF144A
LGALS3	PLPP1	VEGFD					FAM162A
ANXA5	FN1	HNRNPM					ITM2A
CSF1R	NINJ1	TGFBR3					SPARC
CD74	PBXIP1	CHRNA1					ELN
TMEM176B	TMED3	RPS6KA5					PGK1
GRN		ANP32B					COL15A1
ANXA3		RRAGC					SLC25A11
LCP1		ZNF367					TMEM132A
S100A6		ZNF274					UCHL3
TYROBP		DERL1					UQCRH
FYB							MAPKAP1
EHD4							NDUFAF5
PTPRC							WDR12
LAPTM5							MKKS
VIM							ENDOG
TMEM176A							EPDR1
HLA-DRA							ATP5C1
VAT1							STRADB
NDRG1							GOT2
TPP1							CLYBL
MSN							ASNA1
CASP1							SLC25A3
CAPG
SERPING1
CTSZ
PLEKHB1
CYBA
MGST1
CTSS
ITGB2
NFE2L2
CLEC7A
TREM2
ASAH1
FCER1G
ANXA4
ARHGDIB
CD68
RNASE4
APOD
C3AR1
SLC44A1
ARL11
LY86
VWF
CD44
GNS
SLC15A3
TLR2
FAH
CHI3L1
LAMP2
CAPN2
TXNIP
MAOB
PLD4
ABCA1
RIN2
CRYAB
AIF1
GFAP
CD302
LITAF
PMP22
SREBF1
GPR137B
GSTP1
SUN2
TSPO
ERBIN
IFI30
CSRP1
CD37
TMED10
FUCA1
MT2A
ALOX5AP
ZC3HAV1
CD82
HSPB8
SRGN
FAM213A
NOP53
SGK1
HEXB
WNK1
ITGB5
METTL7A
TGFBR2
ALDH2
EPHX1
CNN3
ANKRD13A
TMEM63A
PON2
F3
SLC14A1
PLA2G16
ALDH6A1
GLTP
RHOC
ABHD4
