# Supplementary material for: Ageing transcriptome meta-analysis reveals similarities and differences between key mammalian tissues
Source: Aging (Albany NY). 2021 Feb 11;13(3):3313–41. doi: 10.18632/aging.202648 (PMC7906136; doi:10.18632/aging.202648)
Supplement: Supplementary Tables 19 to 26 [file aging-13-202648-s007.xlsx]

## Sheet: AllOver
Table S19. Random Forest results ranking GO terms by their ability to predict a gene being classified as overexpressed in the global analysis.
Expression	Rank	GO ID	GO term	Probability	Precision
O	1	GO:2001198	regulation of dendritic cell differentiation	0.6133	2.5667
O	2	GO:0071276	cellular response to cadmium ion	0.5712	18.4333
O	3	GO:0071294	cellular response to zinc ion	0.4522	19.7667
O	4	GO:0046686	response to cadmium ion	0.4444	15.9667
O	5	GO:0042288	MHC class I protein binding	0.3122	1.24
O	6	GO:0006958	complement activation, classical pathway	0.2759	9.7
O	7	GO:0042287	MHC protein binding	0.2712	1.4
O	8	GO:0010043	response to zinc ion	0.2683	20.3
O	9	GO:0051043	regulation of membrane protein ectodomain proteolysis	0.2667	0.8095
O	10	GO:0010875	positive regulation of cholesterol efflux	0.2611	1
O	11	GO:0019883	antigen processing and presentation of endogenous antigen	0.2583	0.7273
O	12	GO:0070527	platelet aggregation	0.2447	2.1667
O	13	GO:0097066	response to thyroid hormone	0.2389	0.9091
O	14	GO:0006026	aminoglycan catabolic process	0.2206	1.7308
O	15	GO:0071248	cellular response to metal ion	0.2096	21.9
O	16	GO:0006956	complement activation	0.2071	7.8667
O	17	GO:0004859	phospholipase inhibitor activity	0.2067	0.7143
O	18	GO:0001948	glycoprotein binding	0.2043	1.3846
O	19	GO:0007159	leukocyte cell-cell adhesion	0.2042	1.8333
O	20	GO:0055102	lipase inhibitor activity	0.2	0.375
O	21	GO:0006027	glycosaminoglycan catabolic process	0.1997	1.7826
O	22	GO:0032373	positive regulation of sterol transport	0.1986	0.8421
O	23	GO:0071241	cellular response to inorganic substance	0.1979	21.4333
O	24	GO:0005041	low-density lipoprotein receptor activity	0.1979	0.6552
O	25	GO:0032743	positive regulation of interleukin-2 production	0.1959	0.8333
O	26	GO:0031904	endosome lumen	0.1936	0.913
O	27	GO:0072376	protein activation cascade	0.1868	12.5
O	28	GO:0008191	metalloendopeptidase inhibitor activity	0.1833	0.7778
O	29	GO:0010324	membrane invagination	0.1787	1.5517
O	30	GO:0097530	granulocyte migration	0.1783	1.1333
O	31	GO:0071827	plasma lipoprotein particle organization	0.1759	1
O	32	GO:0043277	apoptotic cell clearance	0.1722	0.75
O	33	GO:0043202	lysosomal lumen	0.1717	15.9333
O	34	GO:0002224	toll-like receptor signaling pathway	0.1714	3.6667
O	35	GO:0071803	positive regulation of podosome assembly	0.1667	0.5333
O	36	GO:0010885	regulation of cholesterol storage	0.1667	0.5
O	37	GO:0035578	azurophil granule lumen	0.1663	10.5
O	38	GO:0034109	homotypic cell-cell adhesion	0.1637	3.1667
O	39	GO:0044548	S100 protein binding	0.163	0.6667
O	40	GO:0005581	collagen trimer	0.1629	2.7586
O	41	GO:0048770	pigment granule	0.1601	4.5333
O	42	GO:0005775	vacuolar lumen	0.1597	40.6667
O	43	GO:0002020	protease binding	0.1594	3
O	44	GO:0018904	ether metabolic process	0.159	0.6296
O	45	GO:0006907	pinocytosis	0.1583	0.5556
O	46	GO:0050858	negative regulation of antigen receptor-mediated signaling pathway	0.1569	0.8889
O	47	GO:0031093	platelet alpha granule lumen	0.1568	4.2759
O	48	GO:0015108	chloride transmembrane transporter activity	0.1559	0.5714
O	49	GO:0042116	macrophage activation	0.1522	0.9412
O	50	GO:0009415	response to water	0.1522	0.5333
O	51	GO:0031098	stress-activated protein kinase signaling cascade	0.1512	0.5
O	52	GO:0005504	fatty acid binding	0.1511	0.5294
O	53	GO:0033598	mammary gland epithelial cell proliferation	0.15	0.4545
O	54	GO:0034142	toll-like receptor 4 signaling pathway	0.1472	0.6667
O	55	GO:0045807	positive regulation of endocytosis	0.1466	4.2857
O	56	GO:0046332	SMAD binding	0.1461	2.1
O	57	GO:0015485	cholesterol binding	0.146	0.7857
O	58	GO:0048306	calcium-dependent protein binding	0.1456	2.0714
O	59	GO:0071216	cellular response to biotic stimulus	0.1388	10.069
O	60	GO:0016903	oxidoreductase activity, acting on the aldehyde or oxo group of donors	0.1384	1.8621
O	61	GO:0032495	response to muramyl dipeptide	0.1384	0.6
O	62	GO:0072562	blood microparticle	0.1369	12.8333
O	63	GO:0050810	regulation of steroid biosynthetic process	0.1368	0.9583
O	64	GO:0043312	neutrophil degranulation	0.1365	247.833
O	65	GO:0002576	platelet degranulation	0.1365	11.9667
O	66	GO:0036230	granulocyte activation	0.1362	233.767
O	67	GO:0045766	positive regulation of angiogenesis	0.1352	3.6071
O	68	GO:0034774	secretory granule lumen	0.1347	71.7667
O	69	GO:0042119	neutrophil activation	0.1338	235.9
O	70	GO:0002283	neutrophil activation involved in immune response	0.1333	215.9
O	71	GO:0018198	peptidyl-cysteine modification	0.1333	0.8
O	72	GO:0002275	myeloid cell activation involved in immune response	0.1329	230.9
O	73	GO:0051224	negative regulation of protein transport	0.1328	1.3214
O	74	GO:0019372	lipoxygenase pathway	0.1328	0.3846
O	75	GO:0006949	syncytium formation	0.1321	1
O	76	GO:0006911	phagocytosis, engulfment	0.1317	0.3889
O	77	GO:0002221	pattern recognition receptor signaling pathway	0.1314	8
O	78	GO:0042035	regulation of cytokine biosynthetic process	0.1302	2.4444
O	79	GO:0071801	regulation of podosome assembly	0.129	0.6
O	80	GO:0002263	cell activation involved in immune response	0.1286	230.367
O	81	GO:0043299	leukocyte degranulation	0.1286	226.7
O	82	GO:0071222	cellular response to lipopolysaccharide	0.1278	3.8621
O	83	GO:0061572	actin filament bundle organization	0.1276	0.5769
O	84	GO:0002274	myeloid leukocyte activation	0.1273	240.267
O	85	GO:0002366	leukocyte activation involved in immune response	0.1256	242.8
O	86	GO:0045055	regulated exocytosis	0.1253	284.633
O	87	GO:0022617	extracellular matrix disassembly	0.125	1.8214
O	88	GO:0032735	positive regulation of interleukin-12 production	0.1244	0.5333
O	89	GO:0071219	cellular response to molecule of bacterial origin	0.1238	6.0667
O	90	GO:1904813	ficolin-1-rich granule lumen	0.1237	11
O	91	GO:0042470	melanosome	0.1234	5.4483
O	92	GO:0060333	interferon-gamma-mediated signaling pathway	0.1233	3.7667
O	93	GO:0006887	exocytosis	0.1228	276.233
O	94	GO:0060205	cytoplasmic vesicle lumen	0.1225	55.4
O	95	GO:0032376	positive regulation of cholesterol transport	0.1222	0.5
O	96	GO:0031983	vesicle lumen	0.1217	54.7
O	97	GO:0010038	response to metal ion	0.1214	32.5
O	98	GO:0010874	regulation of cholesterol efflux	0.1209	0.4444
O	99	GO:0043491	protein kinase B signaling	0.1196	1.0455
O	100	GO:0045926	negative regulation of growth	0.1194	23.1667
O	101	GO:0031100	animal organ regeneration	0.1191	1.5556
O	102	GO:0021762	substantia nigra development	0.119	0.7083
O	103	GO:0042101	T cell receptor complex	0.119	0.3704
O	104	GO:0002460	adaptive immune response based on somatic recombination of immune receptors built from immunoglobulin superfamily domains	0.1184	1.5
O	105	GO:0098632	protein binding involved in cell-cell adhesion	0.1184	0.7586
O	106	GO:0010743	regulation of macrophage derived foam cell differentiation	0.1179	0.5385
O	107	GO:0019886	antigen processing and presentation of exogenous peptide antigen via MHC class II	0.1177	0.9667
O	108	GO:0009112	nucleobase metabolic process	0.1167	1.3929
O	109	GO:0035325	Toll-like receptor binding	0.1167	1
O	110	GO:0001772	immunological synapse	0.1167	0.3929
O	111	GO:0030670	phagocytic vesicle membrane	0.1165	2.0345
O	112	GO:0002690	positive regulation of leukocyte chemotaxis	0.1159	3.1071
O	113	GO:0034332	adherens junction organization	0.1159	0.5
O	114	GO:0002218	activation of innate immune response	0.1158	13.1
O	115	GO:0002526	acute inflammatory response	0.1158	1.08
O	116	GO:0016894	endonuclease activity, active with either ribo- or deoxyribonucleic acids and producing 3'-phosphomonoesters	0.1155	1
O	117	GO:0043531	ADP binding	0.1147	0.64
O	118	GO:0035577	azurophil granule membrane	0.1146	3.7667
O	119	GO:0005901	caveola	0.1144	0.3636
O	120	GO:0002285	lymphocyte activation involved in immune response	0.1138	1.4483
O	121	GO:0005544	calcium-dependent phospholipid binding	0.1137	0.7333
O	122	GO:0002252	immune effector process	0.1133	395.033
O	123	GO:0040013	negative regulation of locomotion	0.1133	5.5667
O	124	GO:1904018	positive regulation of vasculature development	0.1128	2.1379
O	125	GO:0000041	transition metal ion transport	0.1128	0.8966
O	126	GO:0032940	secretion by cell	0.1126	356
O	127	GO:0043153	entrainment of circadian clock by photoperiod	0.1121	0.5
O	128	GO:0071363	cellular response to growth factor stimulus	0.1115	1.5714
O	129	GO:0045621	positive regulation of lymphocyte differentiation	0.1113	0.8
O	130	GO:0051403	stress-activated MAPK cascade	0.1111	0.3571
O	131	GO:0006144	purine nucleobase metabolic process	0.1108	0.6
O	132	GO:0001775	cell activation	0.1107	195.333
O	133	GO:0006959	humoral immune response	0.11	17.5667
O	134	GO:0005578	proteinaceous extracellular matrix	0.11	1.1786
O	135	GO:0030168	platelet activation	0.1093	0.6667
O	136	GO:0045321	leukocyte activation	0.1088	202.3
O	137	GO:0030890	positive regulation of B cell proliferation	0.1087	0.6667
O	138	GO:0010035	response to inorganic substance	0.1081	43.8667
O	139	GO:0002699	positive regulation of immune effector process	0.108	1.7391
O	140	GO:0030863	cortical cytoskeleton	0.1078	0.7222
O	141	GO:0002479	antigen processing and presentation of exogenous peptide antigen via MHC class I, TAP-dependent	0.1076	1.2414
O	142	GO:0043123	positive regulation of I-kappaB kinase/NF-kappaB signaling	0.1073	8.3667
O	143	GO:0030100	regulation of endocytosis	0.1067	8.8667
O	144	GO:0022612	gland morphogenesis	0.1059	0.5909
O	145	GO:0045177	apical part of cell	0.1058	0.6087
O	146	GO:0005178	integrin binding	0.1057	2.2963
O	147	GO:0002828	regulation of type 2 immune response	0.1056	0.5
O	148	GO:0046903	secretion	0.1052	308.733
O	149	GO:0002253	activation of immune response	0.105	64.4667
O	150	GO:0016540	protein autoprocessing	0.105	0.5
O	151	GO:0001818	negative regulation of cytokine production	0.1041	13.5
O	152	GO:0002685	regulation of leukocyte migration	0.1039	6.4333
O	153	GO:1901342	regulation of vasculature development	0.1038	4.8966
O	154	GO:0060337	type I interferon signaling pathway	0.1036	2.1
O	155	GO:0097529	myeloid leukocyte migration	0.1031	1.125
O	156	GO:0043280	positive regulation of cysteine-type endopeptidase activity involved in apoptotic process	0.1029	1.5185
O	157	GO:0002824	positive regulation of adaptive immune response based on somatic recombination of immune receptors built from immunoglobulin superfamily domains	0.1029	1.4167
O	158	GO:0002758	innate immune response-activating signal transduction	0.1027	12.6333
O	159	GO:0032370	positive regulation of lipid transport	0.1024	0.9583
O	160	GO:0071345	cellular response to cytokine stimulus	0.1022	14.7333
O	161	GO:0006022	aminoglycan metabolic process	0.1015	2.1071
O	162	GO:0002703	regulation of leukocyte mediated immunity	0.1012	0.9583
O	163	GO:1900153	positive regulation of nuclear-transcribed mRNA catabolic process, deadenylation-dependent decay	0.1011	0.3333
O	164	GO:0034367	macromolecular complex remodeling	0.101	0.48
O	165	GO:0032368	regulation of lipid transport	0.1009	1.0769
O	166	GO:0046634	regulation of alpha-beta T cell activation	0.1008	0.4167
O	167	GO:0043372	positive regulation of CD4-positive, alpha-beta T cell differentiation	0.1004	0.6842
O	168	GO:0007283	spermatogenesis	0.1004	0.4
O	169	GO:1990266	neutrophil migration	0.1003	0.7857
O	170	GO:0030667	secretory granule membrane	0.1002	27.7667
O	171	GO:0030214	hyaluronan catabolic process	0.1	0.5714
O	172	GO:0001977	renal system process involved in regulation of blood volume	0.1	0.5
O	173	GO:0010566	regulation of ketone biosynthetic process	0.1	0.4
O	174	GO:0032645	regulation of granulocyte macrophage colony-stimulating factor production	0.1	0.375
O	175	GO:0072523	purine-containing compound catabolic process	0.0998	1.8966
O	176	GO:0042887	amide transmembrane transporter activity	0.0995	2.7333
O	177	GO:1903555	regulation of tumor necrosis factor superfamily cytokine production	0.0995	1.6087
O	178	GO:0070663	regulation of leukocyte proliferation	0.099	3.6552
O	179	GO:0032496	response to lipopolysaccharide	0.0988	16.0667
O	180	GO:0070013	intracellular organelle lumen	0.0986	104.8
O	181	GO:1990204	oxidoreductase complex	0.0984	0.6
O	182	GO:1904680	peptide transmembrane transporter activity	0.0983	1.1
O	183	GO:0004197	cysteine-type endopeptidase activity	0.0982	1.3333
O	184	GO:0002237	response to molecule of bacterial origin	0.098	21.5667
O	185	GO:1903708	positive regulation of hemopoiesis	0.0979	4.6207
O	186	GO:0050778	positive regulation of immune response	0.0977	101.833
O	187	GO:0043233	organelle lumen	0.0976	120.367
O	188	GO:0071622	regulation of granulocyte chemotaxis	0.0976	1
O	189	GO:0045600	positive regulation of fat cell differentiation	0.0976	0.375
O	190	GO:0032479	regulation of type I interferon production	0.0974	2.1429
O	191	GO:2000107	negative regulation of leukocyte apoptotic process	0.0974	0.75
O	192	GO:0002687	positive regulation of leukocyte migration	0.0972	3.2
O	193	GO:0072215	regulation of metanephros development	0.0972	0.4
O	194	GO:0009612	response to mechanical stimulus	0.0971	1.6296
O	195	GO:0042590	antigen processing and presentation of exogenous peptide antigen via MHC class I	0.0969	1.8333
O	196	GO:1900151	regulation of nuclear-transcribed mRNA catabolic process, deadenylation-dependent decay	0.0967	0.6364
O	197	GO:0043122	regulation of I-kappaB kinase/NF-kappaB signaling	0.0966	15.2667
O	198	GO:0002688	regulation of leukocyte chemotaxis	0.0961	3.0345
O	199	GO:0032944	regulation of mononuclear cell proliferation	0.0959	4.7
O	200	GO:0045089	positive regulation of innate immune response	0.0958	13.8667
O	201	GO:0090025	regulation of monocyte chemotaxis	0.0958	0.375
O	202	GO:0031974	membrane-enclosed lumen	0.0957	99.5667
O	203	GO:0032733	positive regulation of interleukin-10 production	0.0955	0.6087
O	204	GO:1903037	regulation of leukocyte cell-cell adhesion	0.0954	6.4
O	205	GO:1902930	regulation of alcohol biosynthetic process	0.0954	0.5
O	206	GO:0002821	positive regulation of adaptive immune response	0.0953	1.0741
O	207	GO:0001817	regulation of cytokine production	0.0947	122.933
O	208	GO:0050921	positive regulation of chemotaxis	0.0947	4.1034
O	209	GO:0042531	positive regulation of tyrosine phosphorylation of STAT protein	0.0945	0.52
O	210	GO:0030203	glycosaminoglycan metabolic process	0.0944	1.3448
O	211	GO:0001779	natural killer cell differentiation	0.0944	0.5
O	212	GO:0071322	cellular response to carbohydrate stimulus	0.0944	0.2667
O	213	GO:0070003	threonine-type peptidase activity	0.0942	0.9048
O	214	GO:0032103	positive regulation of response to external stimulus	0.0938	24.9333
O	215	GO:0048857	neural nucleus development	0.0935	0.6786
O	216	GO:0046889	positive regulation of lipid biosynthetic process	0.0934	1.12
O	217	GO:0001819	positive regulation of cytokine production	0.0933	29.6667
O	218	GO:0003823	antigen binding	0.0933	0.4211
O	219	GO:1902107	positive regulation of leukocyte differentiation	0.093	2.4615
O	220	GO:0032655	regulation of interleukin-12 production	0.0929	0.5556
O	221	GO:0030198	extracellular matrix organization	0.0928	7.0333
O	222	GO:0002478	antigen processing and presentation of exogenous peptide antigen	0.0927	4.9667
O	223	GO:0071774	response to fibroblast growth factor	0.0925	0.7273
O	224	GO:0031349	positive regulation of defense response	0.092	45.2667
O	225	GO:0098602	single organism cell adhesion	0.0919	20.8
O	226	GO:0042730	fibrinolysis	0.0917	0.5
O	227	GO:0006909	phagocytosis	0.0915	2.4138
O	228	GO:0002822	regulation of adaptive immune response based on somatic recombination of immune receptors built from immunoglobulin superfamily domains	0.0914	1.52
O	229	GO:0007596	blood coagulation	0.0914	1.1034
O	230	GO:0002792	negative regulation of peptide secretion	0.0912	1.28
O	231	GO:0007568	aging	0.091	6.3333
O	232	GO:0019838	growth factor binding	0.0908	10.0333
O	233	GO:0050670	regulation of lymphocyte proliferation	0.0908	2.4
O	234	GO:0002102	podosome	0.0908	0.9655
O	235	GO:0035579	specific granule membrane	0.0902	4.0714
O	236	GO:0071901	negative regulation of protein serine/threonine kinase activity	0.0902	1.6667
O	237	GO:0034097	response to cytokine	0.0895	22.4
O	238	GO:0032946	positive regulation of mononuclear cell proliferation	0.0893	1.4783
O	239	GO:0050727	regulation of inflammatory response	0.0892	17.7667
O	240	GO:1902106	negative regulation of leukocyte differentiation	0.0889	2.5333
O	241	GO:0002523	leukocyte migration involved in inflammatory response	0.0889	0.5556
O	242	GO:0042629	mast cell granule	0.0889	0.3846
O	243	GO:0099024	plasma membrane invagination	0.0885	0.5556
O	244	GO:0050729	positive regulation of inflammatory response	0.0883	2.1
O	245	GO:0000302	response to reactive oxygen species	0.0883	1.6897
O	246	GO:0002757	immune response-activating signal transduction	0.0882	22.9333
O	247	GO:0043062	extracellular structure organization	0.0881	7.5
O	248	GO:1901652	response to peptide	0.0881	6.7241
O	249	GO:0042554	superoxide anion generation	0.0881	0.5
O	250	GO:0002684	positive regulation of immune system process	0.0878	148.5
O	251	GO:0032273	positive regulation of protein polymerization	0.0876	0.7333
O	252	GO:0006521	regulation of cellular amino acid metabolic process	0.0873	0.9048
O	253	GO:1902105	regulation of leukocyte differentiation	0.0871	15.4
O	254	GO:0019218	regulation of steroid metabolic process	0.0867	1
O	255	GO:0044433	cytoplasmic vesicle part	0.0864	272.933
O	256	GO:1904724	tertiary granule lumen	0.0864	1.5833
O	257	GO:0036294	cellular response to decreased oxygen levels	0.0864	0.8519
O	258	GO:0009611	response to wounding	0.0863	3.1
O	259	GO:0046683	response to organophosphorus	0.0862	0.6875
O	260	GO:0019371	cyclooxygenase pathway	0.0862	0.375
O	261	GO:0045682	regulation of epidermis development	0.0861	0.5714
O	262	GO:1904035	regulation of epithelial cell apoptotic process	0.0861	0.5
O	263	GO:1903409	reactive oxygen species biosynthetic process	0.0861	0.1905
O	264	GO:0044437	vacuolar part	0.0859	71.9667
O	265	GO:0035303	regulation of dephosphorylation	0.0858	0.9615
O	266	GO:0000323	lytic vacuole	0.0856	25.3667
O	267	GO:0051091	positive regulation of sequence-specific DNA binding transcription factor activity	0.0854	0.8947
O	268	GO:0016337	single organismal cell-cell adhesion	0.0852	15.3
O	269	GO:0002286	T cell activation involved in immune response	0.0852	0.4762
O	270	GO:0046635	positive regulation of alpha-beta T cell activation	0.0851	0.4
O	271	GO:0015914	phospholipid transport	0.0851	0.3889
O	272	GO:1903706	regulation of hemopoiesis	0.0848	23.5333
O	273	GO:0001101	response to acid chemical	0.0848	3.5862
O	274	GO:0050867	positive regulation of cell activation	0.0847	8.2333
O	275	GO:0005764	lysosome	0.0846	22.9
O	276	GO:0098641	cadherin binding involved in cell-cell adhesion	0.0845	0.5455
O	277	GO:0000768	syncytium formation by plasma membrane fusion	0.0844	1.0333
O	278	GO:0045655	regulation of monocyte differentiation	0.0844	0.3333
O	279	GO:0002764	immune response-regulating signaling pathway	0.084	28.4
O	280	GO:0051249	regulation of lymphocyte activation	0.0838	13.0333
O	281	GO:0051437	positive regulation of ubiquitin-protein ligase activity involved in regulation of mitotic cell cycle transition	0.0837	0.6
O	282	GO:0045121	membrane raft	0.0834	13.2667
O	283	GO:0050731	positive regulation of peptidyl-tyrosine phosphorylation	0.0834	2.963
O	284	GO:0009725	response to hormone	0.0833	7.7667
O	285	GO:0097067	cellular response to thyroid hormone stimulus	0.0833	0.6
O	286	GO:0031406	carboxylic acid binding	0.0833	0.4667
O	287	GO:0072111	cell proliferation involved in kidney development	0.0833	0.3333
O	288	GO:0045646	regulation of erythrocyte differentiation	0.0833	0.3333
O	289	GO:0090023	positive regulation of neutrophil chemotaxis	0.0833	0.2
O	290	GO:0030666	endocytic vesicle membrane	0.0831	6.3
O	291	GO:0015748	organophosphate ester transport	0.083	0.5263
O	292	GO:0001540	beta-amyloid binding	0.0829	0.9655
O	293	GO:0005615	extracellular space	0.0828	135.967
O	294	GO:0042754	negative regulation of circadian rhythm	0.0828	0.32
O	295	GO:0050868	negative regulation of T cell activation	0.0827	0.9545
O	296	GO:0030833	regulation of actin filament polymerization	0.0826	2.1724
O	297	GO:0032481	positive regulation of type I interferon production	0.0825	2.1786
O	298	GO:2001236	regulation of extrinsic apoptotic signaling pathway	0.0825	0.9
O	299	GO:0032720	negative regulation of tumor necrosis factor production	0.0821	0.4667
O	300	GO:1903557	positive regulation of tumor necrosis factor superfamily cytokine production	0.0818	1.0714
O	301	GO:0002456	T cell mediated immunity	0.0818	0.5556
O	302	GO:0051701	interaction with host	0.0816	2.7143
O	303	GO:0050866	negative regulation of cell activation	0.0816	2.5556
O	304	GO:2000106	regulation of leukocyte apoptotic process	0.0813	0.4444
O	305	GO:0032963	collagen metabolic process	0.0812	0.4231
O	306	GO:0007229	integrin-mediated signaling pathway	0.0809	0.8966
O	307	GO:0030101	natural killer cell activation	0.0809	0.3889
O	308	GO:0009743	response to carbohydrate	0.0808	1.2857
O	309	GO:0051017	actin filament bundle assembly	0.0808	0.8
O	310	GO:0031102	neuron projection regeneration	0.0808	0.3846
O	311	GO:0032647	regulation of interferon-alpha production	0.0806	0.4167
O	312	GO:0030335	positive regulation of cell migration	0.0805	12.6
O	313	GO:0071621	granulocyte chemotaxis	0.0805	1.4
O	314	GO:0007584	response to nutrient	0.0805	1.2143
O	315	GO:0030888	regulation of B cell proliferation	0.0804	0.6316
O	316	GO:0022411	cellular component disassembly	0.0802	2.9655
O	317	GO:0031902	late endosome membrane	0.0802	0.7826
O	318	GO:0043407	negative regulation of MAP kinase activity	0.0801	0.8462
O	319	GO:0044259	multicellular organismal macromolecule metabolic process	0.08	0.3448
O	320	GO:0005811	lipid particle	0.08	0.2941
O	321	GO:0050871	positive regulation of B cell activation	0.0799	0.7391
O	322	GO:0042402	cellular biogenic amine catabolic process	0.0799	0.6552
O	323	GO:0004553	hydrolase activity, hydrolyzing O-glycosyl compounds	0.0798	1.9
O	324	GO:0050776	regulation of immune response	0.0795	155.067
O	325	GO:0098857	membrane microdomain	0.0795	13.7667
O	326	GO:0032813	tumor necrosis factor receptor superfamily binding	0.0795	0.3529
O	327	GO:0002376	immune system process	0.0793	742.2
O	328	GO:2000516	positive regulation of CD4-positive, alpha-beta T cell activation	0.0793	0.4286
O	329	GO:0060759	regulation of response to cytokine stimulus	0.079	1.7037
O	330	GO:0009166	nucleotide catabolic process	0.079	1.3667
O	331	GO:0004601	peroxidase activity	0.079	0.8667
O	332	GO:0002495	antigen processing and presentation of peptide antigen via MHC class II	0.079	0.8571
O	333	GO:0050863	regulation of T cell activation	0.0789	5.9333
O	334	GO:0030334	regulation of cell migration	0.0785	73.4333
O	335	GO:0032374	regulation of cholesterol transport	0.0785	0.7273
O	336	GO:0016363	nuclear matrix	0.0784	1.5185
O	337	GO:0031347	regulation of defense response	0.0782	113.1
O	338	GO:0006954	inflammatory response	0.0782	50.1
O	339	GO:0022409	positive regulation of cell-cell adhesion	0.0782	3.6333
O	340	GO:0000904	cell morphogenesis involved in differentiation	0.0782	0.5769
O	341	GO:0002694	regulation of leukocyte activation	0.0781	12.1667
O	342	GO:0051251	positive regulation of lymphocyte activation	0.078	5.7667
O	343	GO:0005773	vacuole	0.0779	25.9667
O	344	GO:0071407	cellular response to organic cyclic compound	0.0779	5.4667
O	345	GO:0009991	response to extracellular stimulus	0.0778	6.9
O	346	GO:0043434	response to peptide hormone	0.0778	2.6429
O	347	GO:0015850	organic hydroxy compound transport	0.0778	0.5238
O	348	GO:0061339	establishment or maintenance of monopolar cell polarity	0.0778	0.5
O	349	GO:0061013	regulation of mRNA catabolic process	0.0778	0.5
O	350	GO:0060330	regulation of response to interferon-gamma	0.0778	0.3529
O	351	GO:0070849	response to epidermal growth factor	0.0778	0.3333
O	352	GO:0007520	myoblast fusion	0.0778	0.2692
O	353	GO:0032675	regulation of interleukin-6 production	0.0775	1.381
O	354	GO:0031099	regeneration	0.0774	4.3333
O	355	GO:0006952	defense response	0.0773	223
O	356	GO:0016209	antioxidant activity	0.0773	2.9
O	357	GO:0045087	innate immune response	0.0772	38.7667
O	358	GO:0009648	photoperiodism	0.0771	0.5714
O	359	GO:0005912	adherens junction	0.0769	46.6667
O	360	GO:0042129	regulation of T cell proliferation	0.0769	2.7407
O	361	GO:0034612	response to tumor necrosis factor	0.0767	0.7619
O	362	GO:0002696	positive regulation of leukocyte activation	0.0766	9.3333
O	363	GO:0005518	collagen binding	0.0765	0.3182
O	364	GO:0005924	cell-substrate adherens junction	0.0763	37.4667
O	365	GO:0045088	regulation of innate immune response	0.0763	30.1
O	366	GO:0010921	regulation of phosphatase activity	0.0762	0.28
O	367	GO:0042742	defense response to bacterium	0.076	3.7826
O	368	GO:0009607	response to biotic stimulus	0.0759	59.6
O	369	GO:0007015	actin filament organization	0.0759	5.0333
O	370	GO:0050730	regulation of peptidyl-tyrosine phosphorylation	0.0757	2.7931
O	371	GO:0002697	regulation of immune effector process	0.0755	3.8
O	372	GO:0016620	oxidoreductase activity, acting on the aldehyde or oxo group of donors, NAD or NADP as acceptor	0.0754	0.7667
O	373	GO:0030834	regulation of actin filament depolymerization	0.0752	0.8333
O	374	GO:0043207	response to external biotic stimulus	0.0751	54.0333
O	375	GO:0061158	3'-UTR-mediated mRNA destabilization	0.075	0.3571
O	376	GO:0042542	response to hydrogen peroxide	0.0748	0.8696
O	377	GO:1903707	negative regulation of hemopoiesis	0.0747	3.6667
O	378	GO:0002474	antigen processing and presentation of peptide antigen via MHC class I	0.0746	2.4
O	379	GO:1902904	negative regulation of supramolecular fiber organization	0.0746	1.2308
O	380	GO:0050819	negative regulation of coagulation	0.0746	0.6087
O	381	GO:0030336	negative regulation of cell migration	0.0745	4.7
O	382	GO:0044853	plasma membrane raft	0.0744	0.4
O	383	GO:0016192	vesicle-mediated transport	0.0743	305.3
O	384	GO:0045637	regulation of myeloid cell differentiation	0.0742	4.069
O	385	GO:0071825	protein-lipid complex subunit organization	0.074	0.5926
O	386	GO:0070161	anchoring junction	0.0737	54.6667
O	387	GO:0002819	regulation of adaptive immune response	0.0736	2.3182
O	388	GO:1903510	mucopolysaccharide metabolic process	0.0736	1.0455
O	389	GO:0045471	response to ethanol	0.0734	0.8889
O	390	GO:0019902	phosphatase binding	0.0734	0.6538
O	391	GO:0015698	inorganic anion transport	0.0734	0.5
O	392	GO:0012506	vesicle membrane	0.0732	48.4667
O	393	GO:0008064	regulation of actin polymerization or depolymerization	0.0732	5.1724
O	394	GO:0002695	negative regulation of leukocyte activation	0.0731	1.64
O	395	GO:0070821	tertiary granule membrane	0.073	2.2667
O	396	GO:0046427	positive regulation of JAK-STAT cascade	0.073	1.04
O	397	GO:0042177	negative regulation of protein catabolic process	0.073	0.3
O	398	GO:0032272	negative regulation of protein polymerization	0.0729	0.5625
O	399	GO:0050779	RNA destabilization	0.0728	0.5833
O	400	GO:0009719	response to endogenous stimulus	0.0727	27.8
O	401	GO:0051271	negative regulation of cellular component movement	0.0727	5.1
O	402	GO:0070555	response to interleukin-1	0.0727	1.2857
O	403	GO:0044765	single-organism transport	0.0724	212.8
O	404	GO:0042605	peptide antigen binding	0.0724	0.4545
O	405	GO:0061245	establishment or maintenance of bipolar cell polarity	0.0722	0.3333
O	406	GO:0005925	focal adhesion	0.072	34.2667
O	407	GO:0070848	response to growth factor	0.072	1.6897
O	408	GO:0002682	regulation of immune system process	0.0719	266.767
O	409	GO:0071624	positive regulation of granulocyte chemotaxis	0.0718	0.3333
O	410	GO:2000146	negative regulation of cell motility	0.0717	6.0667
O	411	GO:0004298	threonine-type endopeptidase activity	0.0717	0.5882
O	412	GO:0051050	positive regulation of transport	0.0715	22.7
O	413	GO:0031334	positive regulation of protein complex assembly	0.0715	3.6897
O	414	GO:0097110	scaffold protein binding	0.0715	0.25
O	415	GO:0030947	regulation of vascular endothelial growth factor receptor signaling pathway	0.0714	0.3
O	416	GO:0045296	cadherin binding	0.0713	44.0667
O	417	GO:0050865	regulation of cell activation	0.0713	17.8667
O	418	GO:0032101	regulation of response to external stimulus	0.0712	70.3667
O	419	GO:0050839	cell adhesion molecule binding	0.0711	56.1
O	420	GO:0005741	mitochondrial outer membrane	0.071	3.8
O	421	GO:1900046	regulation of hemostasis	0.071	2.5667
O	422	GO:0030659	cytoplasmic vesicle membrane	0.0708	45.8
O	423	GO:2000514	regulation of CD4-positive, alpha-beta T cell activation	0.0708	0.6111
O	424	GO:0070062	extracellular exosome	0.0707	1048.53
O	425	GO:1903561	extracellular vesicle	0.0707	1035.13
O	426	GO:0030055	cell-substrate junction	0.0707	35.4333
O	427	GO:1901565	organonitrogen compound catabolic process	0.0706	27.4
O	428	GO:0033993	response to lipid	0.0703	39.4667
O	429	GO:0043230	extracellular organelle	0.0701	1000.97
O	430	GO:0040008	regulation of growth	0.0701	45.3
O	431	GO:0022625	cytosolic large ribosomal subunit	0.0701	3.6333
O	432	GO:0001816	cytokine production	0.0701	0.875
O	433	GO:0003013	circulatory system process	0.07	1.2333
O	434	GO:0045182	translation regulator activity	0.07	0.3478
O	435	GO:0032956	regulation of actin cytoskeleton organization	0.0699	9.0333
O	436	GO:0051250	negative regulation of lymphocyte activation	0.0697	1.5652
O	437	GO:1901880	negative regulation of protein depolymerization	0.0697	0.5263
O	438	GO:1903038	negative regulation of leukocyte cell-cell adhesion	0.0695	1
O	439	GO:1902476	chloride transmembrane transport	0.0695	0.5556
O	440	GO:0043242	negative regulation of protein complex disassembly	0.0695	0.4762
O	441	GO:0005635	nuclear envelope	0.0694	5
O	442	GO:0030195	negative regulation of blood coagulation	0.0694	0.9
O	443	GO:0042990	regulation of transcription factor import into nucleus	0.0694	0.2632
O	444	GO:1901700	response to oxygen-containing compound	0.0691	76.6333
O	445	GO:0051270	regulation of cellular component movement	0.0691	56.1
O	446	GO:0016684	oxidoreductase activity, acting on peroxide as acceptor	0.069	1.0714
O	447	GO:0030194	positive regulation of blood coagulation	0.069	0.75
O	448	GO:0098589	membrane region	0.0689	15.6667
O	449	GO:1900048	positive regulation of hemostasis	0.0689	0.5385
O	450	GO:0030228	lipoprotein particle receptor activity	0.0689	0.4231
O	451	GO:0010893	positive regulation of steroid biosynthetic process	0.0689	0.4167
O	452	GO:0009898	cytoplasmic side of plasma membrane	0.0689	0.3333
O	453	GO:1901698	response to nitrogen compound	0.0688	26.0667
O	454	GO:0098542	defense response to other organism	0.0687	14.7333
O	455	GO:0016477	cell migration	0.0687	14.4333
O	456	GO:1903018	regulation of glycoprotein metabolic process	0.0687	0.2174
O	457	GO:0072593	reactive oxygen species metabolic process	0.0683	2.3333
O	458	GO:0031589	cell-substrate adhesion	0.0683	1.3929
O	459	GO:0043488	regulation of mRNA stability	0.0683	1.25
O	460	GO:0070887	cellular response to chemical stimulus	0.0682	95.4667
O	461	GO:0010243	response to organonitrogen compound	0.0682	20.4
O	462	GO:0045765	regulation of angiogenesis	0.0681	3.8621
O	463	GO:0031975	envelope	0.0679	4.4333
O	464	GO:2000145	regulation of cell motility	0.0678	54.5667
O	465	GO:0071310	cellular response to organic substance	0.0678	41.2
O	466	GO:0008656	cysteine-type endopeptidase activator activity involved in apoptotic process	0.0678	0.2857
O	467	GO:1901699	cellular response to nitrogen compound	0.0677	5.2333
O	468	GO:0034330	cell junction organization	0.0677	1.8
O	469	GO:0001894	tissue homeostasis	0.0677	0.7143
O	470	GO:0019882	antigen processing and presentation	0.0673	8.1
O	471	GO:1901136	carbohydrate derivative catabolic process	0.0672	7.5
O	472	GO:0005319	lipid transporter activity	0.0672	0.8966
O	473	GO:0006898	receptor-mediated endocytosis	0.0671	11.7
O	474	GO:0031967	organelle envelope	0.067	5.3667
O	475	GO:0048545	response to steroid hormone	0.067	3.1786
O	476	GO:1904062	regulation of cation transmembrane transport	0.067	0.92
O	477	GO:0042493	response to drug	0.0669	7
O	478	GO:0010950	positive regulation of endopeptidase activity	0.0669	1.5357
O	479	GO:0031343	positive regulation of cell killing	0.0667	1
O	480	GO:0046888	negative regulation of hormone secretion	0.0667	0.4286
O	481	GO:0045616	regulation of keratinocyte differentiation	0.0667	0.3333
O	482	GO:0045604	regulation of epidermal cell differentiation	0.0667	0.3333
O	483	GO:0030212	hyaluronan metabolic process	0.0667	0.3333
O	484	GO:0071889	14-3-3 protein binding	0.0667	0.3
O	485	GO:0003725	double-stranded RNA binding	0.0667	0.25
O	486	GO:0045940	positive regulation of steroid metabolic process	0.0667	0.2222
O	487	GO:0033162	melanosome membrane	0.0667	0.2
O	488	GO:0050818	regulation of coagulation	0.0666	2.2759
O	489	GO:0009267	cellular response to starvation	0.0666	1.069
O	490	GO:1902578	single-organism localization	0.0665	230.4
O	491	GO:0048471	perinuclear region of cytoplasm	0.0665	111
O	492	GO:0022407	regulation of cell-cell adhesion	0.0664	8.8667
O	493	GO:0009649	entrainment of circadian clock	0.0664	0.4828
O	494	GO:0032970	regulation of actin filament-based process	0.0663	10.8333
O	495	GO:0032535	regulation of cellular component size	0.0662	7.5667
O	496	GO:0030193	regulation of blood coagulation	0.0661	2.2
O	497	GO:0015934	large ribosomal subunit	0.066	3.8333
O	498	GO:0002706	regulation of lymphocyte mediated immunity	0.0659	0.85
O	499	GO:0051272	positive regulation of cellular component movement	0.0658	11.6667
O	500	GO:0050900	leukocyte migration	0.0657	6.3333
O	501	GO:0044449	contractile fiber part	0.0656	0.5238
O	502	GO:0001974	blood vessel remodeling	0.0656	0.4545
O	503	GO:0051240	positive regulation of multicellular organismal process	0.0655	47.2333
O	504	GO:0071347	cellular response to interleukin-1	0.0655	1.3333
O	505	GO:0003729	mRNA binding	0.0655	0.52
O	506	GO:0010033	response to organic substance	0.0654	154.6
O	507	GO:0006897	endocytosis	0.0654	32.5667
O	508	GO:0043069	negative regulation of programmed cell death	0.0654	27.2
O	509	GO:0099503	secretory vesicle	0.0654	1.4783
O	510	GO:0006955	immune response	0.0652	174.133
O	511	GO:0019221	cytokine-mediated signaling pathway	0.0652	34.5
O	512	GO:2001235	positive regulation of apoptotic signaling pathway	0.065	1.1333
O	513	GO:0045010	actin nucleation	0.065	0.2917
O	514	GO:0048584	positive regulation of response to stimulus	0.0648	302.1
O	515	GO:0002831	regulation of response to biotic stimulus	0.0648	1.3667
O	516	GO:0040012	regulation of locomotion	0.0647	43.9
O	517	GO:0032680	regulation of tumor necrosis factor production	0.0647	1.913
O	518	GO:0002761	regulation of myeloid leukocyte differentiation	0.0646	1.1071
O	519	GO:0034762	regulation of transmembrane transport	0.0646	1.0435
O	520	GO:0051494	negative regulation of cytoskeleton organization	0.0646	0.625
O	521	GO:0009605	response to external stimulus	0.0645	77.3333
O	522	GO:0014070	response to organic cyclic compound	0.0645	40.1
O	523	GO:0007162	negative regulation of cell adhesion	0.0645	4.3
O	524	GO:0045778	positive regulation of ossification	0.0645	0.75
O	525	GO:0042221	response to chemical	0.0643	256.633
O	526	GO:0051049	regulation of transport	0.0641	53.1333
O	527	GO:0051707	response to other organism	0.0641	23.1667
O	528	GO:0051046	regulation of secretion	0.0641	8.5
O	529	GO:0009986	cell surface	0.064	19.9
O	530	GO:0031146	SCF-dependent proteasomal ubiquitin-dependent protein catabolic process	0.0639	0.5
O	531	GO:0033194	response to hydroperoxide	0.0639	0.3333
O	532	GO:2000147	positive regulation of cell motility	0.0636	10.9
O	533	GO:0001505	regulation of neurotransmitter levels	0.0636	0.75
O	534	GO:0061418	regulation of transcription from RNA polymerase II promoter in response to hypoxia	0.0633	0.6667
O	535	GO:0030098	lymphocyte differentiation	0.0632	1.75
O	536	GO:2000249	regulation of actin cytoskeleton reorganization	0.0631	0.3889
O	537	GO:0019884	antigen processing and presentation of exogenous antigen	0.063	4.0667
O	538	GO:0032879	regulation of localization	0.0629	151.633
O	539	GO:0040017	positive regulation of locomotion	0.0629	11.2
O	540	GO:0030048	actin filament-based movement	0.0629	0.625
O	541	GO:0051495	positive regulation of cytoskeleton organization	0.0628	2.7586
O	542	GO:0043067	regulation of programmed cell death	0.0627	75.1
O	543	GO:0002683	negative regulation of immune system process	0.0626	17.7333
O	544	GO:2000758	positive regulation of peptidyl-lysine acetylation	0.0625	0.16
O	545	GO:0008361	regulation of cell size	0.0624	0.4444
O	546	GO:0033209	tumor necrosis factor-mediated signaling pathway	0.0623	0.64
O	547	GO:0048002	antigen processing and presentation of peptide antigen	0.0622	4.1034
O	548	GO:0032673	regulation of interleukin-4 production	0.0622	0.3
O	549	GO:0031667	response to nutrient levels	0.062	6.6
O	550	GO:2001056	positive regulation of cysteine-type endopeptidase activity	0.0619	1.2
O	551	GO:0071260	cellular response to mechanical stimulus	0.0619	0.4545
O	552	GO:0090066	regulation of anatomical structure size	0.0618	11
O	553	GO:1901214	regulation of neuron death	0.0618	1.7308
O	554	GO:0043394	proteoglycan binding	0.0618	0.875
O	555	GO:0043492	ATPase activity, coupled to movement of substances	0.0618	0.8519
O	556	GO:0044421	extracellular region part	0.0617	807.867
O	557	GO:0043281	regulation of cysteine-type endopeptidase activity involved in apoptotic process	0.0617	2.5862
O	558	GO:1901292	nucleoside phosphate catabolic process	0.0617	1.9655
O	559	GO:0050920	regulation of chemotaxis	0.0617	1.963
O	560	GO:0007599	hemostasis	0.0616	1.5
O	561	GO:0002708	positive regulation of lymphocyte mediated immunity	0.0615	0.5
O	562	GO:0016763	transferase activity, transferring pentosyl groups	0.0614	0.8621
O	563	GO:0051059	NF-kappaB binding	0.0614	0.3333
O	564	GO:0048870	cell motility	0.0613	10.9
O	565	GO:0070372	regulation of ERK1 and ERK2 cascade	0.0613	7.6333
O	566	GO:0005576	extracellular region	0.0611	170.7
O	567	GO:0050848	regulation of calcium-mediated signaling	0.0611	0.6818
O	568	GO:0045295	gamma-catenin binding	0.0611	0.4286
O	569	GO:0001910	regulation of leukocyte mediated cytotoxicity	0.0611	0.4286
O	570	GO:0017081	chloride channel regulator activity	0.0611	0.2632
O	571	GO:0010001	glial cell differentiation	0.0611	0.1765
O	572	GO:1904894	positive regulation of STAT cascade	0.061	0.8148
O	573	GO:0050864	regulation of B cell activation	0.0609	1.3333
O	574	GO:0032922	circadian regulation of gene expression	0.0608	0.9655
O	575	GO:0034368	protein-lipid complex remodeling	0.0608	0.4783
O	576	GO:0050673	epithelial cell proliferation	0.0608	0.25
O	577	GO:0032271	regulation of protein polymerization	0.0607	1.8621
O	578	GO:1900047	negative regulation of hemostasis	0.0606	0.6364
O	579	GO:0031982	vesicle	0.0604	1066.13
O	580	GO:0019867	outer membrane	0.0604	4.4333
O	581	GO:0006919	activation of cysteine-type endopeptidase activity involved in apoptotic process	0.0604	0.6296
O	582	GO:0090175	regulation of establishment of planar polarity	0.0603	1.1818
O	583	GO:0035580	specific granule lumen	0.0603	0.875
O	584	GO:0031012	extracellular matrix	0.0602	10.4
O	585	GO:0045862	positive regulation of proteolysis	0.0602	4.4483
O	586	GO:0030260	entry into host cell	0.0602	0.5
O	587	GO:0042981	regulation of apoptotic process	0.0601	69.6
O	588	GO:0008284	positive regulation of cell proliferation	0.0601	27.4
O	589	GO:0030838	positive regulation of actin filament polymerization	0.0601	1.1786
O	590	GO:0006195	purine nucleotide catabolic process	0.0601	1
O	591	GO:0032355	response to estradiol	0.06	0.7778
O	592	GO:0030054	cell junction	0.0599	75.1667
O	593	GO:0017038	protein import	0.0599	0.75
O	594	GO:0052548	regulation of endopeptidase activity	0.0597	8.4333
O	595	GO:0034369	plasma lipoprotein particle remodeling	0.0596	0.2727
O	596	GO:0045670	regulation of osteoclast differentiation	0.0595	0.4211
O	597	GO:0030141	secretory granule	0.0594	1.087
O	598	GO:0002931	response to ischemia	0.0594	0.4545
O	599	GO:0010561	negative regulation of glycoprotein biosynthetic process	0.0594	0.2
O	600	GO:1901701	cellular response to oxygen-containing compound	0.0593	19.3667
O	601	GO:0005254	chloride channel activity	0.0593	0.2667
O	602	GO:0042330	taxis	0.0592	3.4667
O	603	GO:0050708	regulation of protein secretion	0.0591	2.5862
O	604	GO:0051604	protein maturation	0.0589	1.5667
O	605	GO:0050851	antigen receptor-mediated signaling pathway	0.0589	1.5
O	606	GO:0048678	response to axon injury	0.0589	0.3636
O	607	GO:0017171	serine hydrolase activity	0.0588	21.9
O	608	GO:0046638	positive regulation of alpha-beta T cell differentiation	0.0588	0.4737
O	609	GO:0051241	negative regulation of multicellular organismal process	0.0586	56.5667
O	610	GO:0009895	negative regulation of catabolic process	0.0584	0.75
O	611	GO:0033700	phospholipid efflux	0.0583	0.375
O	612	GO:0006821	chloride transport	0.0583	0.3077
O	613	GO:0043034	costamere	0.0583	0.2353
O	614	GO:0002793	positive regulation of peptide secretion	0.0582	1.3333
O	615	GO:0006606	protein import into nucleus	0.0582	0.6538
O	616	GO:0051716	cellular response to stimulus	0.0581	117.067
O	617	GO:0043066	negative regulation of apoptotic process	0.0581	25.5333
O	618	GO:0016798	hydrolase activity, acting on glycosyl bonds	0.058	1.4333
O	619	GO:1904892	regulation of STAT cascade	0.058	1.125
O	620	GO:0014074	response to purine-containing compound	0.058	0.7778
O	621	GO:0009311	oligosaccharide metabolic process	0.0579	0.5
O	622	GO:0001046	core promoter sequence-specific DNA binding	0.0578	0.7273
O	623	GO:0090316	positive regulation of intracellular protein transport	0.0577	0.7647
O	624	GO:0071496	cellular response to external stimulus	0.0576	3.8571
O	625	GO:0002443	leukocyte mediated immunity	0.0576	0.8636
O	626	GO:0071396	cellular response to lipid	0.0575	4.069
O	627	GO:0051047	positive regulation of secretion	0.0575	2.4138
O	628	GO:0032403	protein complex binding	0.0573	48.4333
O	629	GO:0071417	cellular response to organonitrogen compound	0.0573	2.8333
O	630	GO:0050817	coagulation	0.0573	0.8966
O	631	GO:0030155	regulation of cell adhesion	0.0572	21
O	632	GO:0098869	cellular oxidant detoxification	0.0571	1.7667
O	633	GO:0033238	regulation of cellular amine metabolic process	0.0571	0.55
O	634	GO:0010941	regulation of cell death	0.057	57.3333
O	635	GO:0071356	cellular response to tumor necrosis factor	0.057	0.6111
O	636	GO:0006692	prostanoid metabolic process	0.057	0.3333
O	637	GO:0008236	serine-type peptidase activity	0.0569	23.8667
O	638	GO:0051094	positive regulation of developmental process	0.0568	34.1667
O	639	GO:0051493	regulation of cytoskeleton organization	0.0568	14.1333
O	640	GO:0007623	circadian rhythm	0.0568	4.9667
O	641	GO:0051651	maintenance of location in cell	0.0568	0.8148
O	642	GO:0045669	positive regulation of osteoblast differentiation	0.0568	0.6923
O	643	GO:0046902	regulation of mitochondrial membrane permeability	0.0568	0.3333
O	644	GO:0044420	extracellular matrix component	0.0567	6.3333
O	645	GO:0030135	coated vesicle	0.0567	1.2667
O	646	GO:0050786	RAGE receptor binding	0.0567	0.5
O	647	GO:0032725	positive regulation of granulocyte macrophage colony-stimulating factor production	0.0567	0.5
O	648	GO:0005164	tumor necrosis factor receptor binding	0.0567	0.2105
O	649	GO:0044774	mitotic DNA integrity checkpoint	0.0567	0.1875
O	650	GO:0032588	trans-Golgi network membrane	0.0567	0.1667
O	651	GO:0051048	negative regulation of secretion	0.0566	2.4444
O	652	GO:0006979	response to oxidative stress	0.0565	7.2
O	653	GO:0009636	response to toxic substance	0.0565	1.6
O	654	GO:0032102	negative regulation of response to external stimulus	0.0564	2.087
O	655	GO:0010952	positive regulation of peptidase activity	0.0564	2.0741
O	656	GO:0045785	positive regulation of cell adhesion	0.0563	11.2333
O	657	GO:0031960	response to corticosteroid	0.0563	1.1111
O	658	GO:0050766	positive regulation of phagocytosis	0.0563	0.4375
O	659	GO:0050870	positive regulation of T cell activation	0.056	2.6552
O	660	GO:0002223	stimulatory C-type lectin receptor signaling pathway	0.056	1.1154
O	661	GO:0034314	Arp2/3 complex-mediated actin nucleation	0.056	0.3043
O	662	GO:0043270	positive regulation of ion transport	0.0559	0.9524
O	663	GO:0080134	regulation of response to stress	0.0558	111.767
O	664	GO:0032728	positive regulation of interferon-beta production	0.0557	0.2778
O	665	GO:0060627	regulation of vesicle-mediated transport	0.0556	9.2333
O	666	GO:0005996	monosaccharide metabolic process	0.0556	2.1
O	667	GO:0032649	regulation of interferon-gamma production	0.0556	1.0526
O	668	GO:1903019	negative regulation of glycoprotein metabolic process	0.0556	0.1875
O	669	GO:0032755	positive regulation of interleukin-6 production	0.0555	0.4762
O	670	GO:0004252	serine-type endopeptidase activity	0.0554	17.9333
O	671	GO:0003950	NAD+ ADP-ribosyltransferase activity	0.0554	0.24
O	672	GO:0040011	locomotion	0.0553	15.1
O	673	GO:0007009	plasma membrane organization	0.0553	7.3
O	674	GO:0007160	cell-matrix adhesion	0.0552	0.913
O	675	GO:0097305	response to alcohol	0.0551	1.2593
O	676	GO:0006950	response to stress	0.0548	213.467
O	677	GO:0052547	regulation of peptidase activity	0.0548	9.8667
O	678	GO:0031968	organelle outer membrane	0.0548	4.1333
O	679	GO:0071637	regulation of monocyte chemotactic protein-1 production	0.0548	0.5
O	680	GO:0042789	mRNA transcription from RNA polymerase II promoter	0.0548	0.4286
O	681	GO:0034308	primary alcohol metabolic process	0.0547	2.5
O	682	GO:0045861	negative regulation of proteolysis	0.0547	2.2069
O	683	GO:1903039	positive regulation of leukocyte cell-cell adhesion	0.0546	2.7
O	684	GO:0043489	RNA stabilization	0.0546	0.28
O	685	GO:2001234	negative regulation of apoptotic signaling pathway	0.0545	0.7407
O	686	GO:0042108	positive regulation of cytokine biosynthetic process	0.0543	1.4545
O	687	GO:0032371	regulation of sterol transport	0.0542	0.5
O	688	GO:0016505	peptidase activator activity involved in apoptotic process	0.0542	0.2
O	689	GO:0007166	cell surface receptor signaling pathway	0.0541	121.567
O	690	GO:0042278	purine nucleoside metabolic process	0.0541	0.4483
O	691	GO:0097421	liver regeneration	0.054	0.6429
O	692	GO:0009310	amine catabolic process	0.0539	0.4
O	693	GO:0016485	protein processing	0.0538	1.7241
O	694	GO:0050764	regulation of phagocytosis	0.0538	1.0556
O	695	GO:0051704	multi-organism process	0.0537	52.6667
O	696	GO:0098852	lytic vacuole membrane	0.0537	15.4
O	697	GO:0016072	rRNA metabolic process	0.0536	1.7931
O	698	GO:0012507	ER to Golgi transport vesicle membrane	0.0536	0.3333
O	699	GO:0043086	negative regulation of catalytic activity	0.0534	25.5
O	700	GO:0006915	apoptotic process	0.0534	10.7667
O	701	GO:0050840	extracellular matrix binding	0.0533	0.6552
O	702	GO:0032587	ruffle membrane	0.0533	0.3571
O	703	GO:0030295	protein kinase activator activity	0.0533	0.2105
O	704	GO:0002521	leukocyte differentiation	0.0532	2.7586
O	705	GO:0007179	transforming growth factor beta receptor signaling pathway	0.0532	0.3636
O	706	GO:0007050	cell cycle arrest	0.0532	0.3214
O	707	GO:0070482	response to oxygen levels	0.053	3.5862
O	708	GO:0090087	regulation of peptide transport	0.0529	6.4667
O	709	GO:1903827	regulation of cellular protein localization	0.0529	3.6333
O	710	GO:2000116	regulation of cysteine-type endopeptidase activity	0.0529	2
O	711	GO:1901215	negative regulation of neuron death	0.0529	0.4
O	712	GO:1902903	regulation of supramolecular fiber organization	0.0528	5.3667
O	713	GO:0042626	ATPase activity, coupled to transmembrane movement of substances	0.0528	0.7083
O	714	GO:0032731	positive regulation of interleukin-1 beta production	0.0528	0.4286
O	715	GO:1903556	negative regulation of tumor necrosis factor superfamily cytokine production	0.0528	0.3636
O	716	GO:0030279	negative regulation of ossification	0.0528	0.2353
O	717	GO:1903530	regulation of secretion by cell	0.0527	5.1034
O	718	GO:0048872	homeostasis of number of cells	0.0527	0.6071
O	719	GO:0002639	positive regulation of immunoglobulin production	0.0527	0.4286
O	720	GO:0036293	response to decreased oxygen levels	0.0526	3.9333
O	721	GO:0032642	regulation of chemokine production	0.0526	1.1429
O	722	GO:0098862	cluster of actin-based cell projections	0.0526	0.55
O	723	GO:0098805	whole membrane	0.0524	60.5667
O	724	GO:0048145	regulation of fibroblast proliferation	0.0524	0.75
O	725	GO:0060548	negative regulation of cell death	0.0523	18.1667
O	726	GO:2000377	regulation of reactive oxygen species metabolic process	0.0523	1.1429
O	727	GO:0004518	nuclease activity	0.0523	0.5556
O	728	GO:0099106	ion channel regulator activity	0.0523	0.2174
O	729	GO:0001933	negative regulation of protein phosphorylation	0.0522	2.5
O	730	GO:0006633	fatty acid biosynthetic process	0.0522	1.3333
O	731	GO:0006023	aminoglycan biosynthetic process	0.0522	0.5185
O	732	GO:0014068	positive regulation of phosphatidylinositol 3-kinase signaling	0.0522	0.4333
O	733	GO:0048518	positive regulation of biological process	0.0521	283.467
O	734	GO:0098609	cell-cell adhesion	0.0521	21.1
O	735	GO:1901361	organic cyclic compound catabolic process	0.0521	18.4333
O	736	GO:0030855	epithelial cell differentiation	0.052	1.8333
O	737	GO:0045598	regulation of fat cell differentiation	0.052	0.8696
O	738	GO:0001959	regulation of cytokine-mediated signaling pathway	0.0519	1.3043
O	739	GO:0033116	endoplasmic reticulum-Golgi intermediate compartment membrane	0.0518	1.7931
O	740	GO:0042306	regulation of protein import into nucleus	0.0518	0.9583
O	741	GO:0044236	multicellular organism metabolic process	0.0518	0.3043
O	742	GO:0007173	epidermal growth factor receptor signaling pathway	0.0517	0.3913
O	743	GO:0051239	regulation of multicellular organismal process	0.0516	190.933
O	744	GO:0001666	response to hypoxia	0.0516	3.7667
O	745	GO:0005913	cell-cell adherens junction	0.0516	0.9333
O	746	GO:0042127	regulation of cell proliferation	0.0515	71.5333
O	747	GO:0098796	membrane protein complex	0.0515	12.8667
O	748	GO:0060326	cell chemotaxis	0.0515	1.5172
O	749	GO:0042157	lipoprotein metabolic process	0.0515	0.6
O	750	GO:0043269	regulation of ion transport	0.0514	6.6667
O	751	GO:2000378	negative regulation of reactive oxygen species metabolic process	0.0514	0.25
O	752	GO:0061134	peptidase regulator activity	0.0513	3.8667
O	753	GO:0046348	amino sugar catabolic process	0.0513	0.2667
O	754	GO:0050793	regulation of developmental process	0.0511	151.7
O	755	GO:0007155	cell adhesion	0.0511	51.1333
O	756	GO:0044440	endosomal part	0.0511	6.7333
O	757	GO:1990748	cellular detoxification	0.0511	1.8667
O	758	GO:0050896	response to stimulus	0.051	432.4
O	759	GO:0019439	aromatic compound catabolic process	0.051	20.0667
O	760	GO:0042594	response to starvation	0.051	1.1071
O	761	GO:0071229	cellular response to acid chemical	0.0509	0.9615
O	762	GO:2000026	regulation of multicellular organismal development	0.0508	79.9
O	763	GO:0070665	positive regulation of leukocyte proliferation	0.0507	1.2609
O	764	GO:0006935	chemotaxis	0.0505	2.0333
O	765	GO:0042102	positive regulation of T cell proliferation	0.0505	0.7037
O	766	GO:0060341	regulation of cellular localization	0.0503	10.2
O	767	GO:0005044	scavenger receptor activity	0.0503	0.5517
O	768	GO:0032868	response to insulin	0.0503	0.5
O	769	GO:1902905	positive regulation of supramolecular fiber organization	0.0502	2.2069
O	770	GO:0004175	endopeptidase activity	0.0501	22.5333
O	771	GO:0031329	regulation of cellular catabolic process	0.0501	11.1333
O	772	GO:0071495	cellular response to endogenous stimulus	0.0501	6.4667
O	773	GO:0002791	regulation of peptide secretion	0.0501	2.3333
O	774	GO:0098802	plasma membrane receptor complex	0.05	2.6667
O	775	GO:0010959	regulation of metal ion transport	0.05	1.5357
O	776	GO:1902165	regulation of intrinsic apoptotic signaling pathway in response to DNA damage by p53 class mediator	0.05	1
O	777	GO:0043518	negative regulation of DNA damage response, signal transduction by p53 class mediator	0.05	1
O	778	GO:1902991	regulation of amyloid precursor protein catabolic process	0.05	0.5
O	779	GO:0071402	cellular response to lipoprotein particle stimulus	0.05	0.4
O	780	GO:0071675	regulation of mononuclear cell migration	0.05	0.3333
O	781	GO:0060760	positive regulation of response to cytokine stimulus	0.05	0.3333
O	782	GO:0045086	positive regulation of interleukin-2 biosynthetic process	0.05	0.2857
O	783	GO:0031279	regulation of cyclase activity	0.05	0.25
O	784	GO:0017127	cholesterol transporter activity	0.05	0.25
O	785	GO:0015248	sterol transporter activity	0.05	0.25
O	786	GO:0014002	astrocyte development	0.05	0.25
O	787	GO:0002313	mature B cell differentiation involved in immune response	0.05	0.25
O	788	GO:0061097	regulation of protein tyrosine kinase activity	0.05	0.2222
O	789	GO:0045649	regulation of macrophage differentiation	0.05	0.2222
O	790	GO:1902624	positive regulation of neutrophil migration	0.05	0.2
O	791	GO:0046825	regulation of protein export from nucleus	0.05	0.2
O	792	GO:0009268	response to pH	0.05	0.2
O	793	GO:0006878	cellular copper ion homeostasis	0.05	0.1765
O	794	GO:0014015	positive regulation of gliogenesis	0.05	0.1429
O	795	GO:0006515	misfolded or incompletely synthesized protein catabolic process	0.05	0.0952
O	796	GO:0009135	purine nucleoside diphosphate metabolic process	0.05	0.087
O	797	GO:0019730	antimicrobial humoral response	0.0499	0.8571
O	798	GO:0006928	movement of cell or subcellular component	0.0497	20.1333
O	799	GO:0097435	supramolecular fiber organization	0.0496	5
O	800	GO:0045727	positive regulation of translation	0.0495	1.5333
O	801	GO:0061045	negative regulation of wound healing	0.0495	0.3636
O	802	GO:0071375	cellular response to peptide hormone stimulus	0.0494	0.5
O	803	GO:0044403	symbiosis, encompassing mutualism through parasitism	0.0493	16
O	804	GO:0046649	lymphocyte activation	0.0493	5.3
O	805	GO:0030496	midbody	0.0493	0.4118
O	806	GO:0050660	flavin adenine dinucleotide binding	0.0492	1.1667
O	807	GO:0002673	regulation of acute inflammatory response	0.0492	0.4828
O	808	GO:0010508	positive regulation of autophagy	0.0492	0.3333
O	809	GO:0016504	peptidase activator activity	0.0492	0.2857
O	810	GO:0022610	biological adhesion	0.0491	40.8
O	811	GO:0044773	mitotic DNA damage checkpoint	0.0491	0.25
O	812	GO:0002698	negative regulation of immune effector process	0.049	0.3846
O	813	GO:0000287	magnesium ion binding	0.0489	1.2667
O	814	GO:0045596	negative regulation of cell differentiation	0.0488	16.9667
O	815	GO:0098797	plasma membrane protein complex	0.0487	2.0769
O	816	GO:0006614	SRP-dependent cotranslational protein targeting to membrane	0.0486	2.8333
O	817	GO:0061041	regulation of wound healing	0.0486	2.0667
O	818	GO:0045927	positive regulation of growth	0.0486	0.32
O	819	GO:0044419	interspecies interaction between organisms	0.0485	21.7333
O	820	GO:0030162	regulation of proteolysis	0.0485	15
O	821	GO:0044089	positive regulation of cellular component biogenesis	0.0485	8.1333
O	822	GO:0070201	regulation of establishment of protein localization	0.0485	6
O	823	GO:1904950	negative regulation of establishment of protein localization	0.0485	0.76
O	824	GO:0007043	cell-cell junction assembly	0.0485	0.6154
O	825	GO:0031089	platelet dense granule lumen	0.0485	0.16
O	826	GO:0002250	adaptive immune response	0.0484	4.7333
O	827	GO:0000978	RNA polymerase II core promoter proximal region sequence-specific DNA binding	0.0484	0.5294
O	828	GO:0048869	cellular developmental process	0.0483	58.1333
O	829	GO:0051093	negative regulation of developmental process	0.0483	24.4667
O	830	GO:0001889	liver development	0.0483	1.5
O	831	GO:0031348	negative regulation of defense response	0.0483	0.5
O	832	GO:0097061	dendritic spine organization	0.0483	0.2667
O	833	GO:0051238	sequestering of metal ion	0.0483	0.25
O	834	GO:1903036	positive regulation of response to wounding	0.0483	0.2143
O	835	GO:0034341	response to interferon-gamma	0.0482	0.6522
O	836	GO:0048522	positive regulation of cellular process	0.0481	184.733
O	837	GO:0009967	positive regulation of signal transduction	0.0481	72
O	838	GO:0051130	positive regulation of cellular component organization	0.0481	17.0667
O	839	GO:0009617	response to bacterium	0.0481	2.2174
O	840	GO:0042752	regulation of circadian rhythm	0.0481	0.5357
O	841	GO:0051591	response to cAMP	0.0481	0.375
O	842	GO:0007167	enzyme linked receptor protein signaling pathway	0.0479	11.5667
O	843	GO:0030832	regulation of actin filament length	0.0479	2.6786
O	844	GO:0043068	positive regulation of programmed cell death	0.0478	11.6667
O	845	GO:0043065	positive regulation of apoptotic process	0.0478	10.9333
O	846	GO:0005882	intermediate filament	0.0478	0.7931
O	847	GO:0050850	positive regulation of calcium-mediated signaling	0.0478	0.25
O	848	GO:0097708	intracellular vesicle	0.0477	78.0667
O	849	GO:0006613	cotranslational protein targeting to membrane	0.0477	2.5667
O	850	GO:0032231	regulation of actin filament bundle assembly	0.0477	1.1364
O	851	GO:0042307	positive regulation of protein import into nucleus	0.0477	0.3333
O	852	GO:0031966	mitochondrial membrane	0.0476	18.6333
O	853	GO:0016627	oxidoreductase activity, acting on the CH-CH group of donors	0.0476	2.0333
O	854	GO:0022603	regulation of anatomical structure morphogenesis	0.0475	14.3667
O	855	GO:0016032	viral process	0.0475	13.4
O	856	GO:0044391	ribosomal subunit	0.0475	3.8667
O	857	GO:0002429	immune response-activating cell surface receptor signaling pathway	0.0475	2.6667
O	858	GO:2000060	positive regulation of protein ubiquitination involved in ubiquitin-dependent protein catabolic process	0.0475	0.6471
O	859	GO:0016054	organic acid catabolic process	0.0474	7.2333
O	860	GO:0044877	macromolecular complex binding	0.0473	36.0333
O	861	GO:0072599	establishment of protein localization to endoplasmic reticulum	0.0472	2.3103
O	862	GO:0007249	I-kappaB kinase/NF-kappaB signaling	0.0472	0.75
O	863	GO:0044344	cellular response to fibroblast growth factor stimulus	0.0472	0.2727
O	864	GO:0065008	regulation of biological quality	0.0471	155.3
O	865	GO:1902533	positive regulation of intracellular signal transduction	0.0471	34
O	866	GO:0003735	structural constituent of ribosome	0.0471	2.5333
O	867	GO:0051247	positive regulation of protein metabolic process	0.047	39.8333
O	868	GO:0034765	regulation of ion transmembrane transport	0.047	0.4615
O	869	GO:0032880	regulation of protein localization	0.0469	9.0667
O	870	GO:0009893	positive regulation of metabolic process	0.0467	69.6
O	871	GO:0044270	cellular nitrogen compound catabolic process	0.0466	12.1
O	872	GO:0005911	cell-cell junction	0.0466	9.6
O	873	GO:0051051	negative regulation of transport	0.0466	3.0333
O	874	GO:0046822	regulation of nucleocytoplasmic transport	0.0466	0.8333
O	875	GO:0048010	vascular endothelial growth factor receptor signaling pathway	0.0466	0.6957
O	876	GO:0009154	purine ribonucleotide catabolic process	0.0466	0.25
O	877	GO:0006040	amino sugar metabolic process	0.0465	1.9
O	878	GO:0009119	ribonucleoside metabolic process	0.0465	0.9333
O	879	GO:0051828	entry into other organism involved in symbiotic interaction	0.0465	0.4667
O	880	GO:0012501	programmed cell death	0.0464	10.1
O	881	GO:0098581	detection of external biotic stimulus	0.0464	0.3333
O	882	GO:0048583	regulation of response to stimulus	0.0463	231.433
O	883	GO:0031090	organelle membrane	0.0463	199.3
O	884	GO:0044712	single-organism catabolic process	0.0463	40.9667
O	885	GO:0001934	positive regulation of protein phosphorylation	0.0463	12.5
O	886	GO:0005765	lysosomal membrane	0.0462	14.4
O	887	GO:0090559	regulation of membrane permeability	0.0462	0.25
O	888	GO:0009628	response to abiotic stimulus	0.0461	26.2
O	889	GO:1903533	regulation of protein targeting	0.0461	2.3571
O	890	GO:0034329	cell junction assembly	0.0461	0.5714
O	891	GO:0031410	cytoplasmic vesicle	0.046	76.3
O	892	GO:0044767	single-organism developmental process	0.0459	160.967
O	893	GO:0045335	phagocytic vesicle	0.0459	0.32
O	894	GO:1901653	cellular response to peptide	0.0458	0.3333
O	895	GO:1903076	regulation of protein localization to plasma membrane	0.0458	0.3
O	896	GO:0098588	bounding membrane of organelle	0.0457	98.3333
O	897	GO:1902532	negative regulation of intracellular signal transduction	0.0457	6.2667
O	898	GO:0031227	intrinsic component of endoplasmic reticulum membrane	0.0457	1.4667
O	899	GO:0008217	regulation of blood pressure	0.0457	1.1379
O	900	GO:0043901	negative regulation of multi-organism process	0.0457	0.6154
O	901	GO:0008360	regulation of cell shape	0.0456	1.8667
O	902	GO:0047485	protein N-terminus binding	0.0456	0.381
O	903	GO:0005776	autophagosome	0.0456	0.2667
O	904	GO:0051234	establishment of localization	0.0455	226.833
O	905	GO:0051213	dioxygenase activity	0.0455	0.2353
O	906	GO:0042995	cell projection	0.0454	63.1667
O	907	GO:0044092	negative regulation of molecular function	0.0453	28.4667
O	908	GO:0010647	positive regulation of cell communication	0.0451	42.7
O	909	GO:0032270	positive regulation of cellular protein metabolic process	0.0451	36.5667
O	910	GO:1905269	positive regulation of chromatin organization	0.0451	0.4348
O	911	GO:0031901	early endosome membrane	0.0451	0.3462
O	912	GO:0046700	heterocycle catabolic process	0.0449	11.8667
O	913	GO:0051260	protein homooligomerization	0.0449	2.6
O	914	GO:0045216	cell-cell junction organization	0.0449	1.7857
O	915	GO:1904668	positive regulation of ubiquitin protein ligase activity	0.0449	0.6667
O	916	GO:0048661	positive regulation of smooth muscle cell proliferation	0.0449	0.6364
O	917	GO:0034250	positive regulation of cellular amide metabolic process	0.0448	2.5333
O	918	GO:0090090	negative regulation of canonical Wnt signaling pathway	0.0448	0.7647
O	919	GO:0034284	response to monosaccharide	0.0448	0.5385
O	920	GO:0006658	phosphatidylserine metabolic process	0.0448	0.1852
O	921	GO:0031331	positive regulation of cellular catabolic process	0.0447	3.3
O	922	GO:0009063	cellular amino acid catabolic process	0.0447	1.1724
O	923	GO:0010639	negative regulation of organelle organization	0.0447	0.6296
O	924	GO:1905368	peptidase complex	0.0447	0.5
O	925	GO:0051385	response to mineralocorticoid	0.0447	0.1875
O	926	GO:0023056	positive regulation of signaling	0.0446	47.8333
O	927	GO:0008285	negative regulation of cell proliferation	0.0446	9.7667
O	928	GO:0044409	entry into host	0.0446	0.5
O	929	GO:0051881	regulation of mitochondrial membrane potential	0.0446	0.3333
O	930	GO:0045937	positive regulation of phosphate metabolic process	0.0445	14.5333
O	931	GO:0043618	regulation of transcription from RNA polymerase II promoter in response to stress	0.0445	0.7083
O	932	GO:0010942	positive regulation of cell death	0.0444	10.1333
O	933	GO:0032386	regulation of intracellular transport	0.0444	3.2333
O	934	GO:0034123	positive regulation of toll-like receptor signaling pathway	0.0444	1
O	935	GO:0001909	leukocyte mediated cytotoxicity	0.0444	1
O	936	GO:0032703	negative regulation of interleukin-2 production	0.0444	0.6667
O	937	GO:0046329	negative regulation of JNK cascade	0.0444	0.5
O	938	GO:0031103	axon regeneration	0.0444	0.5
O	939	GO:0030149	sphingolipid catabolic process	0.0444	0.4
O	940	GO:1904036	negative regulation of epithelial cell apoptotic process	0.0444	0.3333
O	941	GO:0055094	response to lipoprotein particle	0.0444	0.3333
O	942	GO:0090303	positive regulation of wound healing	0.0444	0.3125
O	943	GO:0042339	keratan sulfate metabolic process	0.0444	0.25
O	944	GO:1903427	negative regulation of reactive oxygen species biosynthetic process	0.0444	0.2222
O	945	GO:0001891	phagocytic cup	0.0444	0.2143
O	946	GO:0071480	cellular response to gamma radiation	0.0444	0.1818
O	947	GO:0030140	trans-Golgi network transport vesicle	0.0444	0.1667
O	948	GO:0009896	positive regulation of catabolic process	0.0443	4.8
O	949	GO:1903146	regulation of mitophagy	0.0443	0.2381
O	950	GO:0006810	transport	0.0442	233.433
O	951	GO:0009897	external side of plasma membrane	0.0442	3.5
O	952	GO:0030593	neutrophil chemotaxis	0.0442	1.4286
O	953	GO:0072686	mitotic spindle	0.0442	0.2
O	954	GO:0005774	vacuolar membrane	0.0441	13.2
O	955	GO:0051443	positive regulation of ubiquitin-protein transferase activity	0.0441	0.4737
O	956	GO:0031325	positive regulation of cellular metabolic process	0.0439	71.1
O	957	GO:0007169	transmembrane receptor protein tyrosine kinase signaling pathway	0.0438	9.0667
O	958	GO:1903532	positive regulation of secretion by cell	0.0438	1.3182
O	959	GO:0016651	oxidoreductase activity, acting on NAD(P)H	0.0438	0.3182
O	960	GO:0045911	positive regulation of DNA recombination	0.0438	0.3077
O	961	GO:0006662	glycerol ether metabolic process	0.0438	0.2917
O	962	GO:0042803	protein homodimerization activity	0.0437	14.9667
O	963	GO:0071822	protein complex subunit organization	0.0436	23
O	964	GO:0007165	signal transduction	0.0435	256.133
O	965	GO:0030177	positive regulation of Wnt signaling pathway	0.0435	0.5385
O	966	GO:0048519	negative regulation of biological process	0.0434	240.067
O	967	GO:0042802	identical protein binding	0.0434	56.6
O	968	GO:0006631	fatty acid metabolic process	0.0434	14.0667
O	969	GO:0044764	multi-organism cellular process	0.0434	11.6667
O	970	GO:0010008	endosome membrane	0.0434	4.2
O	971	GO:0050777	negative regulation of immune response	0.0434	0.2632
O	972	GO:0005543	phospholipid binding	0.0433	9.6
O	973	GO:0019900	kinase binding	0.0433	8.2
O	974	GO:0055082	cellular chemical homeostasis	0.0433	3.5517
O	975	GO:0004497	monooxygenase activity	0.0433	2.5667
O	976	GO:0051246	regulation of protein metabolic process	0.0432	97.4333
O	977	GO:0009056	catabolic process	0.0432	73.5667
O	978	GO:0051248	negative regulation of protein metabolic process	0.0432	21.3
O	979	GO:0008344	adult locomotory behavior	0.0432	0.7586
O	980	GO:0015629	actin cytoskeleton	0.0431	4.5333
O	981	GO:0001523	retinoid metabolic process	0.0431	1.9
O	982	GO:1901879	regulation of protein depolymerization	0.0431	0.6
O	983	GO:0055081	anion homeostasis	0.0431	0.5556
O	984	GO:0042060	wound healing	0.0431	0.4375
O	985	GO:0060260	regulation of transcription initiation from RNA polymerase II promoter	0.0431	0.28
O	986	GO:0031664	regulation of lipopolysaccharide-mediated signaling pathway	0.0431	0.2222
O	987	GO:0006469	negative regulation of protein kinase activity	0.043	3.2
O	988	GO:0030835	negative regulation of actin filament depolymerization	0.0429	0.4762
O	989	GO:0032502	developmental process	0.0428	134.333
O	990	GO:0008219	cell death	0.0428	12.2333
O	991	GO:0043903	regulation of symbiosis, encompassing mutualism through parasitism	0.0428	1.4483
O	992	GO:0031663	lipopolysaccharide-mediated signaling pathway	0.0428	0.375
O	993	GO:0051287	NAD binding	0.0428	0.3333
O	994	GO:0038127	ERBB signaling pathway	0.0428	0.2857
O	995	GO:1901575	organic substance catabolic process	0.0427	76.4
O	996	GO:0044427	chromosomal part	0.0427	0.3929
O	997	GO:0001664	G-protein coupled receptor binding	0.0427	0.3182
O	998	GO:0032663	regulation of interleukin-2 production	0.0426	0.9524
O	999	GO:2001242	regulation of intrinsic apoptotic signaling pathway	0.0426	0.6207
O	1000	GO:0006694	steroid biosynthetic process	0.0426	0.125
O	1001	GO:1902531	regulation of intracellular signal transduction	0.0425	75.6667
O	1002	GO:2001233	regulation of apoptotic signaling pathway	0.0425	3.2667
O	1003	GO:1900180	regulation of protein localization to nucleus	0.0425	1.3214
O	1004	GO:1905954	positive regulation of lipid localization	0.0425	0.8929
O	1005	GO:0051444	negative regulation of ubiquitin-protein transferase activity	0.0425	0.7778
O	1006	GO:1903034	regulation of response to wounding	0.0424	2
O	1007	GO:1901658	glycosyl compound catabolic process	0.0424	0.2692
O	1008	GO:0005743	mitochondrial inner membrane	0.0423	4.5
O	1009	GO:0033144	negative regulation of intracellular steroid hormone receptor signaling pathway	0.0423	0.4643
O	1010	GO:0045597	positive regulation of cell differentiation	0.0422	12.8333
O	1011	GO:0044282	small molecule catabolic process	0.0422	11.6
O	1012	GO:0002768	immune response-regulating cell surface receptor signaling pathway	0.0422	2.9667
O	1013	GO:0000184	nuclear-transcribed mRNA catabolic process, nonsense-mediated decay	0.0422	2.3793
O	1014	GO:1902235	regulation of endoplasmic reticulum stress-induced intrinsic apoptotic signaling pathway	0.0422	0.2273
O	1015	GO:0005102	receptor binding	0.0421	57.0333
O	1016	GO:0004857	enzyme inhibitor activity	0.0421	6.8333
O	1017	GO:0043408	regulation of MAPK cascade	0.0421	6.8
O	1018	GO:0016705	oxidoreductase activity, acting on paired donors, with incorporation or reduction of molecular oxygen	0.0421	2.6
O	1019	GO:0006721	terpenoid metabolic process	0.0421	2.3667
O	1020	GO:0090022	regulation of neutrophil chemotaxis	0.0421	0.25
O	1021	GO:0001932	regulation of protein phosphorylation	0.042	26.5333
O	1022	GO:0044087	regulation of cellular component biogenesis	0.042	25.7667
O	1023	GO:0042176	regulation of protein catabolic process	0.042	2.2069
O	1024	GO:0046890	regulation of lipid biosynthetic process	0.042	2.1429
O	1025	GO:0051223	regulation of protein transport	0.0419	4.6
O	1026	GO:0051896	regulation of protein kinase B signaling	0.0418	0.9231
O	1027	GO:0016525	negative regulation of angiogenesis	0.0418	0.1875
O	1028	GO:0050801	ion homeostasis	0.0417	5.0667
O	1029	GO:0010888	negative regulation of lipid storage	0.0417	0.7143
O	1030	GO:0070229	negative regulation of lymphocyte apoptotic process	0.0417	0.5
O	1031	GO:0035994	response to muscle stretch	0.0417	0.5
O	1032	GO:0050820	positive regulation of coagulation	0.0417	0.4667
O	1033	GO:0034446	substrate adhesion-dependent cell spreading	0.0417	0.2941
O	1034	GO:0034185	apolipoprotein binding	0.0417	0.2857
O	1035	GO:0061515	myeloid cell development	0.0417	0.25
O	1036	GO:0030864	cortical actin cytoskeleton	0.0417	0.25
O	1037	GO:0046033	AMP metabolic process	0.0417	0.2143
O	1038	GO:0032727	positive regulation of interferon-alpha production	0.0417	0.2
O	1039	GO:0097696	STAT cascade	0.0417	0.1818
O	1040	GO:0032753	positive regulation of interleukin-4 production	0.0417	0.1818
O	1041	GO:0009313	oligosaccharide catabolic process	0.0417	0.1667
O	1042	GO:0001782	B cell homeostasis	0.0417	0.1667
O	1043	GO:0090026	positive regulation of monocyte chemotaxis	0.0417	0.125
O	1044	GO:0099643	signal release from synapse	0.0417	0.1111
O	1045	GO:0071840	cellular component organization or biogenesis	0.0416	189.3
O	1046	GO:0008289	lipid binding	0.0416	23.3667
O	1047	GO:0051259	protein oligomerization	0.0416	2.7333
O	1048	GO:0010646	regulation of cell communication	0.0415	83.5667
O	1049	GO:0016101	diterpenoid metabolic process	0.0415	1.9333
O	1050	GO:0032870	cellular response to hormone stimulus	0.0415	1.4545
O	1051	GO:0071456	cellular response to hypoxia	0.0415	0.5652
O	1052	GO:0043227	membrane-bounded organelle	0.0414	722.1
O	1053	GO:0051693	actin filament capping	0.0414	0.2381
O	1054	GO:0009966	regulation of signal transduction	0.0413	82.5333
O	1055	GO:0010604	positive regulation of macromolecule metabolic process	0.0413	61.1667
O	1056	GO:0003018	vascular process in circulatory system	0.0413	0.2632
O	1057	GO:0051179	localization	0.0412	217.733
O	1058	GO:0046983	protein dimerization activity	0.0412	19.9
O	1059	GO:0005902	microvillus	0.0412	0.6
O	1060	GO:0006066	alcohol metabolic process	0.0411	8.9667
O	1061	GO:0071214	cellular response to abiotic stimulus	0.0411	2.1667
O	1062	GO:0051222	positive regulation of protein transport	0.0411	1.84
O	1063	GO:0044710	single-organism metabolic process	0.041	233.3
O	1064	GO:0010977	negative regulation of neuron projection development	0.041	1.3
O	1065	GO:0006775	fat-soluble vitamin metabolic process	0.041	0.5172
O	1066	GO:0043178	alcohol binding	0.041	0.2692
O	1067	GO:0019220	regulation of phosphate metabolic process	0.0409	18.3
O	1068	GO:0042592	homeostatic process	0.0409	14.8667
O	1069	GO:0019083	viral transcription	0.0409	2
O	1070	GO:0030662	coated vesicle membrane	0.0409	0.3478
O	1071	GO:0004725	protein tyrosine phosphatase activity	0.0408	0.2667
O	1072	GO:2000257	regulation of protein activation cascade	0.0408	0.2632
O	1073	GO:0044444	cytoplasmic part	0.0407	1373.87
O	1074	GO:0038024	cargo receptor activity	0.0407	1.5667
O	1075	GO:0023051	regulation of signaling	0.0406	65.4667
O	1076	GO:0030154	cell differentiation	0.0406	30.0667
O	1077	GO:0044802	single-organism membrane organization	0.0406	16.0667
O	1078	GO:0042327	positive regulation of phosphorylation	0.0406	10.4
O	1079	GO:0043900	regulation of multi-organism process	0.0406	3.8333
O	1080	GO:0098552	side of membrane	0.0406	3.7667
O	1081	GO:1903322	positive regulation of protein modification by small protein conjugation or removal	0.0406	0.2381
O	1082	GO:0007006	mitochondrial membrane organization	0.0406	0.1667
O	1083	GO:0035556	intracellular signal transduction	0.0405	46.4667
O	1084	GO:1901264	carbohydrate derivative transport	0.0405	0.2632
O	1085	GO:0002220	innate immune response activating cell surface receptor signaling pathway	0.0404	0.6667
O	1086	GO:0051439	regulation of ubiquitin-protein ligase activity involved in mitotic cell cycle	0.0404	0.5294
O	1087	GO:0043043	peptide biosynthetic process	0.0403	4.6
O	1088	GO:0022408	negative regulation of cell-cell adhesion	0.0403	0.7826
O	1089	GO:0044763	single-organism cellular process	0.0402	393.833
O	1090	GO:0031965	nuclear membrane	0.0402	14.0333
O	1091	GO:0045444	fat cell differentiation	0.0402	0.8966
O	1092	GO:0070301	cellular response to hydrogen peroxide	0.0402	0.6429
O	1093	GO:0035567	non-canonical Wnt signaling pathway	0.0402	0.6429
O	1094	GO:0005938	cell cortex	0.0401	3.5
O	1095	GO:0090342	regulation of cell aging	0.0401	0.1429
O	1096	GO:0010562	positive regulation of phosphorus metabolic process	0.04	11.2
O	1097	GO:0043254	regulation of protein complex assembly	0.04	6.2667
O	1098	GO:0048771	tissue remodeling	0.04	0.5238
O	1099	GO:0030540	female genitalia development	0.04	0.3333
O	1100	GO:0043369	CD4-positive or CD8-positive, alpha-beta T cell lineage commitment	0.04	0.2857
O	1101	GO:0042613	MHC class II protein complex	0.04	0.2222
O	1102	GO:0044257	cellular protein catabolic process	0.04	0.1765
O	1103	GO:1903311	regulation of mRNA metabolic process	0.04	0.1667
O	1104	GO:0043954	cellular component maintenance	0.04	0.1481
O	1105	GO:0005521	lamin binding	0.04	0.1111
O	1106	GO:0043025	neuronal cell body	0.0399	3.3448
O	1107	GO:0042517	positive regulation of tyrosine phosphorylation of Stat3 protein	0.0399	0.2308
O	1108	GO:0008283	cell proliferation	0.0398	7.7333
O	1109	GO:0043200	response to amino acid	0.0398	0.6538
O	1110	GO:1905521	regulation of macrophage migration	0.0398	0.5714
O	1111	GO:0045595	regulation of cell differentiation	0.0397	51.1
O	1112	GO:0030866	cortical actin cytoskeleton organization	0.0397	0.2593
O	1113	GO:0031226	intrinsic component of plasma membrane	0.0396	129.2
O	1114	GO:0031399	regulation of protein modification process	0.0396	38.8667
O	1115	GO:0072330	monocarboxylic acid biosynthetic process	0.0396	2.9
O	1116	GO:0002449	lymphocyte mediated immunity	0.0396	0.7619
O	1117	GO:0009055	electron carrier activity	0.0396	0.75
O	1118	GO:0030595	leukocyte chemotaxis	0.0396	0.6522
O	1119	GO:0034103	regulation of tissue remodeling	0.0396	0.5
O	1120	GO:0090150	establishment of protein localization to membrane	0.0395	2.8333
O	1121	GO:0048812	neuron projection morphogenesis	0.0395	0.4483
O	1122	GO:0051592	response to calcium ion	0.0395	0.3077
O	1123	GO:0032268	regulation of cellular protein metabolic process	0.0394	54.8
O	1124	GO:0004871	signal transducer activity	0.0394	44.3667
O	1125	GO:0046395	carboxylic acid catabolic process	0.0394	7.8667
O	1126	GO:0051129	negative regulation of cellular component organization	0.0393	7.2667
O	1127	GO:0045619	regulation of lymphocyte differentiation	0.0393	0.96
O	1128	GO:0002504	antigen processing and presentation of peptide or polysaccharide antigen via MHC class II	0.0393	0.6429
O	1129	GO:2000058	regulation of protein ubiquitination involved in ubiquitin-dependent protein catabolic process	0.0393	0.2308
O	1130	GO:0032269	negative regulation of cellular protein metabolic process	0.0392	15.2
O	1131	GO:0010955	negative regulation of protein processing	0.0392	0.375
O	1132	GO:1903052	positive regulation of proteolysis involved in cellular protein catabolic process	0.0392	0.2083
O	1133	GO:0016787	hydrolase activity	0.0391	124.533
O	1134	GO:0051347	positive regulation of transferase activity	0.0391	2.5185
O	1135	GO:0005887	integral component of plasma membrane	0.039	124.6
O	1136	GO:0070613	regulation of protein processing	0.039	0.8276
O	1137	GO:0060071	Wnt signaling pathway, planar cell polarity pathway	0.039	0.6471
O	1138	GO:0043226	organelle	0.0389	766.5
O	1139	GO:0048523	negative regulation of cellular process	0.0389	153.833
O	1140	GO:0044281	small molecule metabolic process	0.0389	93.9333
O	1141	GO:0031323	regulation of cellular metabolic process	0.0389	86.2667
O	1142	GO:0006461	protein complex assembly	0.0389	17.7333
O	1143	GO:0019318	hexose metabolic process	0.0389	0.9333
O	1144	GO:0009749	response to glucose	0.0389	0.5833
O	1145	GO:0050860	negative regulation of T cell receptor signaling pathway	0.0389	0.2727
O	1146	GO:0042056	chemoattractant activity	0.0389	0.1111
O	1147	GO:0016043	cellular component organization	0.0388	164.667
O	1148	GO:0006629	lipid metabolic process	0.0388	81.6
O	1149	GO:0042110	T cell activation	0.0388	1.1
O	1150	GO:0009746	response to hexose	0.0388	0.8696
O	1151	GO:0097035	regulation of membrane lipid distribution	0.0388	0.1739
O	1152	GO:0044699	single-organism process	0.0387	416.067
O	1153	GO:0004721	phosphoprotein phosphatase activity	0.0387	0.3571
O	1154	GO:0044459	plasma membrane part	0.0386	177.6
O	1155	GO:0055114	oxidation-reduction process	0.0386	39.3667
O	1156	GO:0016491	oxidoreductase activity	0.0386	31.0333
O	1157	GO:0008233	peptidase activity	0.0386	23.1667
O	1158	GO:0042325	regulation of phosphorylation	0.0386	17.6333
O	1159	GO:0035035	histone acetyltransferase binding	0.0386	0.3846
O	1160	GO:0051174	regulation of phosphorus metabolic process	0.0385	14.5333
O	1161	GO:0000979	RNA polymerase II core promoter sequence-specific DNA binding	0.0385	0.4444
O	1162	GO:0061014	positive regulation of mRNA catabolic process	0.0385	0.375
O	1163	GO:0065007	biological regulation	0.0384	694.067
O	1164	GO:0032787	monocarboxylic acid metabolic process	0.0384	18.9667
O	1165	GO:0009894	regulation of catabolic process	0.0384	7.8
O	1166	GO:0030029	actin filament-based process	0.0384	7.5
O	1167	GO:0005506	iron ion binding	0.0384	2.6
O	1168	GO:0035150	regulation of tube size	0.0384	0.5
O	1169	GO:0050918	positive chemotaxis	0.0384	0.4167
O	1170	GO:0046394	carboxylic acid biosynthetic process	0.0383	5.1333
O	1171	GO:0033673	negative regulation of kinase activity	0.0383	3.6207
O	1172	GO:2000379	positive regulation of reactive oxygen species metabolic process	0.0383	0.5789
O	1173	GO:1905953	negative regulation of lipid localization	0.0383	0.3636
O	1174	GO:0060284	regulation of cell development	0.0382	9
O	1175	GO:0043620	regulation of DNA-templated transcription in response to stress	0.0381	0.7308
O	1176	GO:1901570	fatty acid derivative biosynthetic process	0.0381	0.4583
O	1177	GO:0006801	superoxide metabolic process	0.0381	0.3214
O	1178	GO:0097028	dendritic cell differentiation	0.0381	0.25
O	1179	GO:0033280	response to vitamin D	0.0381	0.2222
O	1180	GO:0010712	regulation of collagen metabolic process	0.0381	0.2143
O	1181	GO:0045599	negative regulation of fat cell differentiation	0.0381	0.125
O	1182	GO:0030183	B cell differentiation	0.0381	0.1053
O	1183	GO:0032991	macromolecular complex	0.038	147.267
O	1184	GO:0009615	response to virus	0.038	2.4333
O	1185	GO:0016810	hydrolase activity, acting on carbon-nitrogen (but not peptide) bonds	0.038	2.3667
O	1186	GO:0051235	maintenance of location	0.038	0.75
O	1187	GO:0034613	cellular protein localization	0.0379	9.8333
O	1188	GO:0044723	single-organism carbohydrate metabolic process	0.0379	2.2667
O	1189	GO:0017048	Rho GTPase binding	0.0379	1.3333
O	1190	GO:0098754	detoxification	0.0379	1.2759
O	1191	GO:0005839	proteasome core complex	0.0379	0.6154
O	1192	GO:0048839	inner ear development	0.0379	0.3103
O	1193	GO:0031214	biomineral tissue development	0.0379	0.1667
O	1194	GO:0065009	regulation of molecular function	0.0378	74
O	1195	GO:0006508	proteolysis	0.0378	32.3
O	1196	GO:0044429	mitochondrial part	0.0378	30
O	1197	GO:0004714	transmembrane receptor protein tyrosine kinase activity	0.0378	0.6364
O	1198	GO:0009057	macromolecule catabolic process	0.0376	10.3
O	1199	GO:0010810	regulation of cell-substrate adhesion	0.0376	1.9667
O	1200	GO:0005509	calcium ion binding	0.0375	29.5
O	1201	GO:0044445	cytosolic part	0.0375	2.2333
O	1202	GO:0001912	positive regulation of leukocyte mediated cytotoxicity	0.0375	0.6667
O	1203	GO:0006069	ethanol oxidation	0.0375	0.5
O	1204	GO:1902593	single-organism nuclear import	0.0375	0.4615
O	1205	GO:0006885	regulation of pH	0.0375	0.2
O	1206	GO:0007269	neurotransmitter secretion	0.0375	0.1333
O	1207	GO:0050794	regulation of cellular process	0.0374	317.8
O	1208	GO:0070011	peptidase activity, acting on L-amino acid peptides	0.0373	25.7333
O	1209	GO:0006412	translation	0.0373	3.5
O	1210	GO:0032989	cellular component morphogenesis	0.0373	2.3667
O	1211	GO:0032387	negative regulation of intracellular transport	0.0373	0.5385
O	1212	GO:0010563	negative regulation of phosphorus metabolic process	0.0372	4.8333
O	1213	GO:0042277	peptide binding	0.0372	3.7
O	1214	GO:0001525	angiogenesis	0.0372	2.1667
O	1215	GO:0061028	establishment of endothelial barrier	0.0372	0.3636
O	1216	GO:0019752	carboxylic acid metabolic process	0.0371	29.3667
O	1217	GO:0019899	enzyme binding	0.0371	26.5
O	1218	GO:0061024	membrane organization	0.0371	21.2
O	1219	GO:0005975	carbohydrate metabolic process	0.0371	6.0333
O	1220	GO:0005200	structural constituent of cytoskeleton	0.0371	2.5
O	1221	GO:0042623	ATPase activity, coupled	0.0371	1.4828
O	1222	GO:0032990	cell part morphogenesis	0.0371	0.75
O	1223	GO:0030574	collagen catabolic process	0.0371	0.4545
O	1224	GO:1903531	negative regulation of secretion by cell	0.037	1.2963
O	1225	GO:0006067	ethanol metabolic process	0.037	0.4667
O	1226	GO:0003179	heart valve morphogenesis	0.037	0.2308
O	1227	GO:0097755	positive regulation of blood vessel diameter	0.037	0.1176
O	1228	GO:0033628	regulation of cell adhesion mediated by integrin	0.037	0.1
O	1229	GO:0050789	regulation of biological process	0.0369	460.5
O	1230	GO:0044248	cellular catabolic process	0.0369	35.6
O	1231	GO:0005604	basement membrane	0.0369	2.3333
O	1232	GO:0002064	epithelial cell development	0.0369	0.5217
O	1233	GO:0034702	ion channel complex	0.0368	0.2609
O	1234	GO:1901564	organonitrogen compound metabolic process	0.0367	46.7667
O	1235	GO:0004177	aminopeptidase activity	0.0367	0.4
O	1236	GO:0031952	regulation of protein autophosphorylation	0.0367	0.25
O	1237	GO:0007597	blood coagulation, intrinsic pathway	0.0367	0.1818
O	1238	GO:0048365	Rac GTPase binding	0.0367	0.1333
O	1239	GO:0060255	regulation of macromolecule metabolic process	0.0365	111.233
O	1240	GO:0043228	non-membrane-bounded organelle	0.0365	61.9333
O	1241	GO:0019866	organelle inner membrane	0.0365	4.3
O	1242	GO:0006082	organic acid metabolic process	0.0364	30.7333
O	1243	GO:0060089	molecular transducer activity	0.0364	23.6
O	1244	GO:0010638	positive regulation of organelle organization	0.0364	5.5667
O	1245	GO:0071384	cellular response to corticosteroid stimulus	0.0364	0.375
O	1246	GO:0010717	regulation of epithelial to mesenchymal transition	0.0364	0.1053
O	1247	GO:0003012	muscle system process	0.0363	1.3667
O	1248	GO:0046434	organophosphate catabolic process	0.0363	1.1333
O	1249	GO:0032501	multicellular organismal process	0.0362	51.2667
O	1250	GO:0006873	cellular ion homeostasis	0.0362	3.5667
O	1251	GO:0004620	phospholipase activity	0.0362	1.7333
O	1252	GO:0007163	establishment or maintenance of cell polarity	0.0362	0.6154
O	1253	GO:0098631	protein binding involved in cell adhesion	0.0362	0.5
O	1254	GO:0007204	positive regulation of cytosolic calcium ion concentration	0.0362	0.3125
O	1255	GO:0051128	regulation of cellular component organization	0.0361	77.7
O	1256	GO:0048646	anatomical structure formation involved in morphogenesis	0.0361	8.7333
O	1257	GO:0019901	protein kinase binding	0.0361	6.2414
O	1258	GO:1903364	positive regulation of cellular protein catabolic process	0.0361	0.7619
O	1259	GO:0016053	organic acid biosynthetic process	0.036	3.7667
O	1260	GO:0051092	positive regulation of NF-kappaB transcription factor activity	0.036	1.1176
O	1261	GO:0009968	negative regulation of signal transduction	0.0359	11.4667
O	1262	GO:0045582	positive regulation of T cell differentiation	0.0359	0.3
O	1263	GO:0008092	cytoskeletal protein binding	0.0358	27
O	1264	GO:0031401	positive regulation of protein modification process	0.0358	13.9333
O	1265	GO:1903035	negative regulation of response to wounding	0.0358	0.2778
O	1266	GO:0010648	negative regulation of cell communication	0.0357	11.5667
O	1267	GO:0016050	vesicle organization	0.0357	3.5667
O	1268	GO:0030003	cellular cation homeostasis	0.0357	3.3667
O	1269	GO:0050662	coenzyme binding	0.0357	2.4667
O	1270	GO:0018209	peptidyl-serine modification	0.0357	1.6333
O	1271	GO:0016820	hydrolase activity, acting on acid anhydrides, catalyzing transmembrane movement of substances	0.0357	0.6
O	1272	GO:0044070	regulation of anion transport	0.0357	0.1667
O	1273	GO:0043234	protein complex	0.0356	53.6333
O	1274	GO:0007346	regulation of mitotic cell cycle	0.0356	1.9
O	1275	GO:0033293	monocarboxylic acid binding	0.0356	0.2353
O	1276	GO:0044448	cell cortex part	0.0356	0.1
O	1277	GO:0044422	organelle part	0.0355	496.1
O	1278	GO:0004872	receptor activity	0.0355	22.5
O	1279	GO:0033554	cellular response to stress	0.0355	18.1333
O	1280	GO:0038093	Fc receptor signaling pathway	0.0355	0.6316
O	1281	GO:0043524	negative regulation of neuron apoptotic process	0.0354	1.1765
O	1282	GO:0051496	positive regulation of stress fiber assembly	0.0354	0.2
O	1283	GO:0045184	establishment of protein localization	0.0353	21.3333
O	1284	GO:0072524	pyridine-containing compound metabolic process	0.0353	0.7
O	1285	GO:0015931	nucleobase-containing compound transport	0.0353	0.2667
O	1286	GO:0044446	intracellular organelle part	0.0352	501.933
O	1287	GO:0019222	regulation of metabolic process	0.0352	96.9
O	1288	GO:0031572	G2 DNA damage checkpoint	0.0352	0.5263
O	1289	GO:0002920	regulation of humoral immune response	0.0352	0.4737
O	1290	GO:0002027	regulation of heart rate	0.0352	0.1429
O	1291	GO:0043436	oxoacid metabolic process	0.0351	30.9
O	1292	GO:0043229	intracellular organelle	0.035	442.867
O	1293	GO:0071704	organic substance metabolic process	0.035	193.333
O	1294	GO:0048856	anatomical structure development	0.035	66.8
O	1295	GO:0044297	cell body	0.035	4.0667
O	1296	GO:0000956	nuclear-transcribed mRNA catabolic process	0.035	2.3929
O	1297	GO:0044243	multicellular organismal catabolic process	0.035	0.4167
O	1298	GO:0048513	animal organ development	0.0349	9.9
O	1299	GO:0048878	chemical homeostasis	0.0349	5.1667
O	1300	GO:0006605	protein targeting	0.0349	2.2759
O	1301	GO:1903391	regulation of adherens junction organization	0.0349	0.25
O	1302	GO:0051960	regulation of nervous system development	0.0348	6.7
O	1303	GO:0006612	protein targeting to membrane	0.0348	1.9615
O	1304	GO:0050707	regulation of cytokine secretion	0.0348	1.1304
O	1305	GO:0038096	Fc-gamma receptor signaling pathway involved in phagocytosis	0.0348	0.4167
O	1306	GO:0044255	cellular lipid metabolic process	0.0347	47.6333
O	1307	GO:0050768	negative regulation of neurogenesis	0.0347	2.7333
O	1308	GO:1904951	positive regulation of establishment of protein localization	0.0347	2
O	1309	GO:0050852	T cell receptor signaling pathway	0.0347	0.8077
O	1310	GO:0045667	regulation of osteoblast differentiation	0.0347	0.64
O	1311	GO:1903169	regulation of calcium ion transmembrane transport	0.0347	0.5
O	1312	GO:0070727	cellular macromolecule localization	0.0346	10.6
O	1313	GO:0043005	neuron projection	0.0345	12.5
O	1314	GO:0031532	actin cytoskeleton reorganization	0.0345	0.375
O	1315	GO:0032846	positive regulation of homeostatic process	0.0345	0.3182
O	1316	GO:0030425	dendrite	0.0344	3.3
O	1317	GO:0006413	translational initiation	0.0344	2.0667
O	1318	GO:0006720	isoprenoid metabolic process	0.0344	1.5
O	1319	GO:0101003	ficolin-1-rich granule membrane	0.0344	1.0833
O	1320	GO:0043231	intracellular membrane-bounded organelle	0.0343	376.233
O	1321	GO:0008152	metabolic process	0.0343	232.167
O	1322	GO:0022607	cellular component assembly	0.0343	40.8667
O	1323	GO:0034655	nucleobase-containing compound catabolic process	0.0343	5.0333
O	1324	GO:0045047	protein targeting to ER	0.0343	1.9
O	1325	GO:0031647	regulation of protein stability	0.0343	0.125
O	1326	GO:0003824	catalytic activity	0.0342	180.9
O	1327	GO:0050790	regulation of catalytic activity	0.0342	57.8
O	1328	GO:0043232	intracellular non-membrane-bounded organelle	0.0342	53.9667
O	1329	GO:0005768	endosome	0.0342	14.0667
O	1330	GO:0051346	negative regulation of hydrolase activity	0.0342	2.8667
O	1331	GO:0033043	regulation of organelle organization	0.0341	17.1
O	1332	GO:1903829	positive regulation of cellular protein localization	0.0341	2.3571
O	1333	GO:0010975	regulation of neuron projection development	0.034	1.6
O	1334	GO:0050709	negative regulation of protein secretion	0.034	0.8
O	1335	GO:0009306	protein secretion	0.0339	1.0667
O	1336	GO:0050679	positive regulation of epithelial cell proliferation	0.0339	0.3182
O	1337	GO:0034707	chloride channel complex	0.0339	0.2857
O	1338	GO:0080090	regulation of primary metabolic process	0.0338	84.9333
O	1339	GO:1901135	carbohydrate derivative metabolic process	0.0338	21.1333
O	1340	GO:0051254	positive regulation of RNA metabolic process	0.0338	14.5333
O	1341	GO:0019904	protein domain specific binding	0.0338	7.7667
O	1342	GO:0043549	regulation of kinase activity	0.0338	7.5333
O	1343	GO:0016042	lipid catabolic process	0.0338	6.7333
O	1344	GO:0032682	negative regulation of chemokine production	0.0338	0.5
O	1345	GO:0015833	peptide transport	0.0337	21.8
O	1346	GO:0048511	rhythmic process	0.0337	5.3
O	1347	GO:0005539	glycosaminoglycan binding	0.0337	2.9667
O	1348	GO:0004866	endopeptidase inhibitor activity	0.0337	2.0333
O	1349	GO:0005788	endoplasmic reticulum lumen	0.0337	0.48
O	1350	GO:0002702	positive regulation of production of molecular mediator of immune response	0.0337	0.2857
O	1351	GO:0005885	Arp2/3 protein complex	0.0337	0.2778
O	1352	GO:0007264	small GTPase mediated signal transduction	0.0336	10.9333
O	1353	GO:0006766	vitamin metabolic process	0.0336	1.6667
O	1354	GO:0009266	response to temperature stimulus	0.0336	0.6154
O	1355	GO:0097367	carbohydrate derivative binding	0.0335	28.4
O	1356	GO:0018105	peptidyl-serine phosphorylation	0.0335	1.1
O	1357	GO:0030449	regulation of complement activation	0.0335	0.381
O	1358	GO:0007601	visual perception	0.0335	0.2308
O	1359	GO:0032526	response to retinoic acid	0.0334	0.8333
O	1360	GO:0071453	cellular response to oxygen levels	0.0334	0.44
O	1361	GO:0030234	enzyme regulator activity	0.0333	26
O	1362	GO:0031328	positive regulation of cellular biosynthetic process	0.0333	15.5
O	1363	GO:0030176	integral component of endoplasmic reticulum membrane	0.0333	1.5
O	1364	GO:0070328	triglyceride homeostasis	0.0333	1
O	1365	GO:0032823	regulation of natural killer cell differentiation	0.0333	1
O	1366	GO:0010884	positive regulation of lipid storage	0.0333	1
O	1367	GO:0005001	transmembrane receptor protein tyrosine phosphatase activity	0.0333	1
O	1368	GO:0002090	regulation of receptor internalization	0.0333	1
O	1369	GO:0030136	clathrin-coated vesicle	0.0333	0.5172
O	1370	GO:1900750	oligopeptide binding	0.0333	0.5
O	1371	GO:0032930	positive regulation of superoxide anion generation	0.0333	0.5
O	1372	GO:0010447	response to acidic pH	0.0333	0.5
O	1373	GO:0009620	response to fungus	0.0333	0.5
O	1374	GO:1902883	negative regulation of response to oxidative stress	0.0333	0.3333
O	1375	GO:0070325	lipoprotein particle receptor binding	0.0333	0.3333
O	1376	GO:0035924	cellular response to vascular endothelial growth factor stimulus	0.0333	0.3333
O	1377	GO:0030316	osteoclast differentiation	0.0333	0.3333
O	1378	GO:0002440	production of molecular mediator of immune response	0.0333	0.3333
O	1379	GO:0030859	polarized epithelial cell differentiation	0.0333	0.2857
O	1380	GO:2000810	regulation of bicellular tight junction assembly	0.0333	0.25
O	1381	GO:1903649	regulation of cytoplasmic transport	0.0333	0.25
O	1382	GO:0090196	regulation of chemokine secretion	0.0333	0.25
O	1383	GO:0045921	positive regulation of exocytosis	0.0333	0.25
O	1384	GO:0045080	positive regulation of chemokine biosynthetic process	0.0333	0.25
O	1385	GO:0044126	regulation of growth of symbiont in host	0.0333	0.25
O	1386	GO:0033688	regulation of osteoblast proliferation	0.0333	0.25
O	1387	GO:0032965	regulation of collagen biosynthetic process	0.0333	0.25
O	1388	GO:0032816	positive regulation of natural killer cell activation	0.0333	0.25
O	1389	GO:0010165	response to X-ray	0.0333	0.25
O	1390	GO:0010039	response to iron ion	0.0333	0.25
O	1391	GO:0005109	frizzled binding	0.0333	0.25
O	1392	GO:0071556	integral component of lumenal side of endoplasmic reticulum membrane	0.0333	0.2222
O	1393	GO:0002830	positive regulation of type 2 immune response	0.0333	0.2222
O	1394	GO:2001044	regulation of integrin-mediated signaling pathway	0.0333	0.2
O	1395	GO:0072677	eosinophil migration	0.0333	0.2
O	1396	GO:0071385	cellular response to glucocorticoid stimulus	0.0333	0.2
O	1397	GO:0032365	intracellular lipid transport	0.0333	0.2
O	1398	GO:0010543	regulation of platelet activation	0.0333	0.2
O	1399	GO:0005767	secondary lysosome	0.0333	0.2
O	1400	GO:0002825	regulation of T-helper 1 type immune response	0.0333	0.2
O	1401	GO:0060148	positive regulation of posttranscriptional gene silencing	0.0333	0.1667
O	1402	GO:0050892	intestinal absorption	0.0333	0.1667
O	1403	GO:0032814	regulation of natural killer cell activation	0.0333	0.1667
O	1404	GO:0016601	Rac protein signal transduction	0.0333	0.1667
O	1405	GO:0010837	regulation of keratinocyte proliferation	0.0333	0.1667
O	1406	GO:0010745	negative regulation of macrophage derived foam cell differentiation	0.0333	0.1667
O	1407	GO:0051894	positive regulation of focal adhesion assembly	0.0333	0.1429
O	1408	GO:0045408	regulation of interleukin-6 biosynthetic process	0.0333	0.1429
O	1409	GO:0019865	immunoglobulin binding	0.0333	0.1429
O	1410	GO:0015682	ferric iron transport	0.0333	0.1429
O	1411	GO:0010595	positive regulation of endothelial cell migration	0.0333	0.1429
O	1412	GO:0010574	regulation of vascular endothelial growth factor production	0.0333	0.1429
O	1413	GO:0002360	T cell lineage commitment	0.0333	0.1429
O	1414	GO:0086001	cardiac muscle cell action potential	0.0333	0.125
O	1415	GO:0036041	long-chain fatty acid binding	0.0333	0.125
O	1416	GO:0034644	cellular response to UV	0.0333	0.125
O	1417	GO:0060122	inner ear receptor stereocilium organization	0.0333	0.1
O	1418	GO:0048806	genitalia development	0.0333	0.1
O	1419	GO:0032232	negative regulation of actin filament bundle assembly	0.0333	0.1
O	1420	GO:0030216	keratinocyte differentiation	0.0333	0.1
O	1421	GO:0006937	regulation of muscle contraction	0.0333	0.1
O	1422	GO:1900181	negative regulation of protein localization to nucleus	0.0333	0.0909
O	1423	GO:0045076	regulation of interleukin-2 biosynthetic process	0.0333	0.0909
O	1424	GO:0007417	central nervous system development	0.0333	0.0909
O	1425	GO:0044319	wound healing, spreading of cells	0.0333	0.0833
O	1426	GO:2000241	regulation of reproductive process	0.0333	0.0769
O	1427	GO:0034637	cellular carbohydrate biosynthetic process	0.0333	0.0769
O	1428	GO:0007276	gamete generation	0.0333	0.0769
O	1429	GO:0009913	epidermal cell differentiation	0.0333	0.0667
O	1430	GO:0071277	cellular response to calcium ion	0.0333	0.0526
O	1431	GO:0048585	negative regulation of response to stimulus	0.0332	12.6667
O	1432	GO:0023057	negative regulation of signaling	0.0332	10.8667
O	1433	GO:0001726	ruffle	0.0332	0.2609
O	1434	GO:0033036	macromolecule localization	0.0331	26.5333
O	1435	GO:0005198	structural molecule activity	0.0331	15.9
O	1436	GO:0031345	negative regulation of cell projection organization	0.0331	0.9667
O	1437	GO:0050854	regulation of antigen receptor-mediated signaling pathway	0.0331	0.6667
O	1438	GO:0043177	organic acid binding	0.0331	0.25
O	1439	GO:0051641	cellular localization	0.033	20.1333
O	1440	GO:0045859	regulation of protein kinase activity	0.033	7.7333
O	1441	GO:0050878	regulation of body fluid levels	0.033	4.1667
O	1442	GO:0010951	negative regulation of endopeptidase activity	0.033	2.7241
O	1443	GO:0005125	cytokine activity	0.033	1.5862
O	1444	GO:1901657	glycosyl compound metabolic process	0.033	0.6552
O	1445	GO:1901615	organic hydroxy compound metabolic process	0.0329	10.7333
O	1446	GO:0044057	regulation of system process	0.0329	2.1
O	1447	GO:0043487	regulation of RNA stability	0.0329	1.2692
O	1448	GO:0006518	peptide metabolic process	0.0328	5.2333
O	1449	GO:0043409	negative regulation of MAPK cascade	0.0328	0.8889
O	1450	GO:0032729	positive regulation of interferon-gamma production	0.0328	0.4706
O	1451	GO:0019674	NAD metabolic process	0.0328	0.2667
O	1452	GO:0042573	retinoic acid metabolic process	0.0328	0.25
O	1453	GO:0006796	phosphate-containing compound metabolic process	0.0327	32.6333
O	1454	GO:0006886	intracellular protein transport	0.0327	8
O	1455	GO:0019216	regulation of lipid metabolic process	0.0327	2.2333
O	1456	GO:0051607	defense response to virus	0.0327	2.0667
O	1457	GO:0048660	regulation of smooth muscle cell proliferation	0.0327	0.4118
O	1458	GO:0038023	signaling receptor activity	0.0326	16
O	1459	GO:0031295	T cell costimulation	0.0326	0.6296
O	1460	GO:0005856	cytoskeleton	0.0325	22.5333
O	1461	GO:0033365	protein localization to organelle	0.0325	5.4333
O	1462	GO:0003705	transcription factor activity, RNA polymerase II distal enhancer sequence-specific binding	0.0325	2.7333
O	1463	GO:0055065	metal ion homeostasis	0.0325	1.7333
O	1464	GO:0032760	positive regulation of tumor necrosis factor production	0.0325	0.4167
O	1465	GO:0044217	other organism part	0.0325	0.2
O	1466	GO:0044707	single-multicellular organism process	0.0324	32.8333
O	1467	GO:0016020	membrane	0.0323	377.233
O	1468	GO:0044238	primary metabolic process	0.0323	157.833
O	1469	GO:0003008	system process	0.0323	10.4333
O	1470	GO:0001558	regulation of cell growth	0.0323	4.4667
O	1471	GO:1903362	regulation of cellular protein catabolic process	0.0323	0.9333
O	1472	GO:0046718	viral entry into host cell	0.0323	0.3214
O	1473	GO:0008104	protein localization	0.0322	27.5333
O	1474	GO:1903508	positive regulation of nucleic acid-templated transcription	0.0322	10.3
O	1475	GO:0005886	plasma membrane	0.0321	233.533
O	1476	GO:0098771	inorganic ion homeostasis	0.0321	3.5333
O	1477	GO:0072657	protein localization to membrane	0.0321	3.4
O	1478	GO:0042326	negative regulation of phosphorylation	0.0321	3.1
O	1479	GO:0042509	regulation of tyrosine phosphorylation of STAT protein	0.0321	0.6471
O	1480	GO:0002700	regulation of production of molecular mediator of immune response	0.0321	0.64
O	1481	GO:0005829	cytosol	0.032	281.8
O	1482	GO:0015031	protein transport	0.032	19.3333
O	1483	GO:0051348	negative regulation of transferase activity	0.032	3.3
O	1484	GO:0030036	actin cytoskeleton organization	0.032	3.3
O	1485	GO:0005770	late endosome	0.032	2.1667
O	1486	GO:0031333	negative regulation of protein complex assembly	0.032	0.3333
O	1487	GO:0044430	cytoskeletal part	0.0319	23.4
O	1488	GO:0046456	icosanoid biosynthetic process	0.0319	0.3043
O	1489	GO:0045935	positive regulation of nucleobase-containing compound metabolic process	0.0318	15
O	1490	GO:0051090	regulation of sequence-specific DNA binding transcription factor activity	0.0318	2.4667
O	1491	GO:0009653	anatomical structure morphogenesis	0.0317	13.1
O	1492	GO:0045936	negative regulation of phosphate metabolic process	0.0317	3.9667
O	1493	GO:0006953	acute-phase response	0.0317	0.4
O	1494	GO:0043173	nucleotide salvage	0.0317	0.2222
O	1495	GO:0042886	amide transport	0.0316	22.9
O	1496	GO:0008083	growth factor activity	0.0316	0.7083
O	1497	GO:1901988	negative regulation of cell cycle phase transition	0.0316	0.4762
O	1498	GO:0032507	maintenance of protein location in cell	0.0316	0.3889
O	1499	GO:0033157	regulation of intracellular protein transport	0.0315	1.3214
O	1500	GO:0051452	intracellular pH reduction	0.0315	0.4286
O	1501	GO:0060191	regulation of lipase activity	0.0315	0.3529
O	1502	GO:0005737	cytoplasm	0.0314	157.167
O	1503	GO:1903317	regulation of protein maturation	0.0314	0.6333
O	1504	GO:0031668	cellular response to extracellular stimulus	0.0314	0.6207
O	1505	GO:0051336	regulation of hydrolase activity	0.0313	32.5667
O	1506	GO:0030308	negative regulation of cell growth	0.0313	1
O	1507	total	NA	0.0312	2383.13
O	1508	GO:0006793	phosphorus metabolic process	0.0312	43.3
O	1509	GO:0006402	mRNA catabolic process	0.0312	2.4
O	1510	GO:1904667	negative regulation of ubiquitin protein ligase activity	0.0312	0.4667
O	1511	GO:0030307	positive regulation of cell growth	0.0312	0.4091
O	1512	GO:0098858	actin-based cell projection	0.0311	1.6667
O	1513	GO:0009892	negative regulation of metabolic process	0.0309	31.2
O	1514	GO:0065003	macromolecular complex assembly	0.0309	19.2333
O	1515	GO:0045664	regulation of neuron differentiation	0.0309	5.0333
O	1516	GO:0010721	negative regulation of cell development	0.0309	2.0333
O	1517	GO:0002009	morphogenesis of an epithelium	0.0309	0.9286
O	1518	GO:0000785	chromatin	0.0309	0.6923
O	1519	GO:0031330	negative regulation of cellular catabolic process	0.0309	0.4118
O	1520	GO:0000139	Golgi membrane	0.0308	18.7
O	1521	GO:0046907	intracellular transport	0.0308	12.3333
O	1522	GO:0006047	UDP-N-acetylglucosamine metabolic process	0.0308	0.3793
O	1523	GO:0046872	metal ion binding	0.0307	128.967
O	1524	GO:0019725	cellular homeostasis	0.0307	2.9667
O	1525	GO:0042113	B cell activation	0.0307	0.5357
O	1526	GO:0046349	amino sugar biosynthetic process	0.0307	0.4333
O	1527	GO:0043167	ion binding	0.0306	168.133
O	1528	GO:0043933	macromolecular complex subunit organization	0.0306	24.9
O	1529	GO:0044283	small molecule biosynthetic process	0.0306	5.8667
O	1530	GO:0033218	amide binding	0.0306	2.7333
O	1531	GO:0031669	cellular response to nutrient levels	0.0306	0.5926
O	1532	GO:0009260	ribonucleotide biosynthetic process	0.0306	0.45
O	1533	GO:0030204	chondroitin sulfate metabolic process	0.0306	0.15
O	1534	GO:0009156	ribonucleoside monophosphate biosynthetic process	0.0305	0.2857
O	1535	GO:0045860	positive regulation of protein kinase activity	0.0304	2.5357
O	1536	GO:0050671	positive regulation of lymphocyte proliferation	0.0304	0.6842
O	1537	GO:0006687	glycosphingolipid metabolic process	0.0303	0.24
O	1538	GO:0097458	neuron part	0.0302	18.4333
O	1539	GO:0044424	intracellular part	0.0301	405.9
O	1540	GO:0048468	cell development	0.0301	3.5333
O	1541	GO:0070972	protein localization to endoplasmic reticulum	0.0301	1.6207
O	1542	GO:0061135	endopeptidase regulator activity	0.03	1.8966
O	1543	GO:1903828	negative regulation of cellular protein localization	0.03	0.3
O	1544	GO:0045834	positive regulation of lipid metabolic process	0.0299	0.5556
O	1545	GO:0046914	transition metal ion binding	0.0298	44.9
O	1546	GO:0051173	positive regulation of nitrogen compound metabolic process	0.0298	21.7667
O	1547	GO:0005789	endoplasmic reticulum membrane	0.0298	21.1667
O	1548	GO:0034248	regulation of cellular amide metabolic process	0.0298	6.5
O	1549	GO:0072594	establishment of protein localization to organelle	0.0298	3.4
O	1550	GO:0097306	cellular response to alcohol	0.0298	0.3333
O	1551	GO:0001618	virus receptor activity	0.0298	0.3333
O	1552	GO:0043331	response to dsRNA	0.0298	0.3077
O	1553	GO:0005515	protein binding	0.0297	529.267
O	1554	GO:0008047	enzyme activator activity	0.0297	17.4333
O	1555	GO:0019637	organophosphate metabolic process	0.0297	16.8667
O	1556	GO:0045732	positive regulation of protein catabolic process	0.0297	0.7273
O	1557	GO:0010972	negative regulation of G2/M transition of mitotic cell cycle	0.0297	0.7143
O	1558	GO:0001938	positive regulation of endothelial cell proliferation	0.0297	0.3636
O	1559	GO:0009987	cellular process	0.0296	356.533
O	1560	GO:0008270	zinc ion binding	0.0296	33
O	1561	GO:1901987	regulation of cell cycle phase transition	0.0296	1.28
O	1562	GO:0035690	cellular response to drug	0.0296	0.2083
O	1563	GO:0019538	protein metabolic process	0.0295	66.1667
O	1564	GO:0055086	nucleobase-containing small molecule metabolic process	0.0295	4.8
O	1565	GO:0022414	reproductive process	0.0295	3.1333
O	1566	GO:0003006	developmental process involved in reproduction	0.0295	1.963
O	1567	GO:0006690	icosanoid metabolic process	0.0295	1.5333
O	1568	GO:0005548	phospholipid transporter activity	0.0295	0.4444
O	1569	GO:0005244	voltage-gated ion channel activity	0.0295	0.3333
O	1570	GO:0044425	membrane part	0.0294	298.167
O	1571	GO:0005634	nucleus	0.0294	118.133
O	1572	GO:0043169	cation binding	0.0294	113.8
O	1573	GO:0097164	ammonium ion metabolic process	0.0294	3.4333
O	1574	GO:0034470	ncRNA processing	0.0294	1.3571
O	1575	GO:0010812	negative regulation of cell-substrate adhesion	0.0294	0.2353
O	1576	GO:0007010	cytoskeleton organization	0.0293	14.9667
O	1577	GO:0043603	cellular amide metabolic process	0.0293	6.2
O	1578	GO:0010628	positive regulation of gene expression	0.0292	19.2333
O	1579	GO:0044431	Golgi apparatus part	0.0292	15.5
O	1580	GO:0051649	establishment of localization in cell	0.0292	15.3667
O	1581	GO:0046425	regulation of JAK-STAT cascade	0.0292	0.6364
O	1582	GO:0032660	regulation of interleukin-17 production	0.0292	0.4286
O	1583	GO:0031324	negative regulation of cellular metabolic process	0.0291	25
O	1584	GO:0023014	signal transduction by protein phosphorylation	0.0291	1.7037
O	1585	GO:0046777	protein autophosphorylation	0.0291	1.3793
O	1586	GO:0051081	nuclear envelope disassembly	0.0291	0.2778
O	1587	GO:0099568	cytoplasmic region	0.029	3.6333
O	1588	GO:0034599	cellular response to oxidative stress	0.029	0.85
O	1589	GO:0038095	Fc-epsilon receptor signaling pathway	0.029	0.8333
O	1590	GO:0090287	regulation of cellular response to growth factor stimulus	0.029	0.6923
O	1591	GO:0048858	cell projection morphogenesis	0.029	0.5667
O	1592	GO:0031294	lymphocyte costimulation	0.029	0.4545
O	1593	GO:0071705	nitrogen compound transport	0.0289	26.5333
O	1594	GO:0009891	positive regulation of biosynthetic process	0.0289	17.1333
O	1595	GO:0071702	organic substance transport	0.0288	29.4333
O	1596	GO:0031400	negative regulation of protein modification process	0.0288	5.3
O	1597	GO:0033674	positive regulation of kinase activity	0.0288	1.6667
O	1598	GO:0044093	positive regulation of molecular function	0.0287	27.6
O	1599	GO:0045665	negative regulation of neuron differentiation	0.0287	1.4667
O	1600	GO:0032388	positive regulation of intracellular transport	0.0287	1.32
O	1601	GO:0045104	intermediate filament cytoskeleton organization	0.0287	0.2222
O	1602	GO:1901137	carbohydrate derivative biosynthetic process	0.0286	6.5333
O	1603	GO:0005126	cytokine receptor binding	0.0286	2.6667
O	1604	GO:0046982	protein heterodimerization activity	0.0286	2.3667
O	1605	GO:0010466	negative regulation of peptidase activity	0.0286	1.8
O	1606	GO:0044432	endoplasmic reticulum part	0.0285	24.4
O	1607	GO:0016462	pyrophosphatase activity	0.0285	5
O	1608	GO:0050767	regulation of neurogenesis	0.0285	4.6
O	1609	GO:0048193	Golgi vesicle transport	0.0285	1.5333
O	1610	GO:0006820	anion transport	0.0285	1.4138
O	1611	GO:0006665	sphingolipid metabolic process	0.0285	0.8667
O	1612	GO:0030139	endocytic vesicle	0.0285	0.44
O	1613	GO:0001952	regulation of cell-matrix adhesion	0.0285	0.4138
O	1614	GO:0043170	macromolecule metabolic process	0.0284	113.133
O	1615	GO:0051338	regulation of transferase activity	0.0284	7.7333
O	1616	GO:0043235	receptor complex	0.0284	3.1
O	1617	GO:0043405	regulation of MAP kinase activity	0.0284	1.5667
O	1618	GO:0050714	positive regulation of protein secretion	0.0284	0.9167
O	1619	GO:0005783	endoplasmic reticulum	0.0283	23.7667
O	1620	GO:1902589	single-organism organelle organization	0.0283	10.6
O	1621	GO:0090276	regulation of peptide hormone secretion	0.0283	0.4286
O	1622	GO:0035148	tube formation	0.0283	0.2273
O	1623	GO:0003779	actin binding	0.0282	11.6333
O	1624	GO:0042579	microbody	0.0282	1.3333
O	1625	GO:0005793	endoplasmic reticulum-Golgi intermediate compartment	0.0282	0.7
O	1626	GO:0008203	cholesterol metabolic process	0.0282	0.2857
O	1627	GO:0006986	response to unfolded protein	0.0282	0.2308
O	1628	GO:1901566	organonitrogen compound biosynthetic process	0.0281	12.8
O	1629	GO:0005881	cytoplasmic microtubule	0.0281	0.3103
O	1630	GO:0032845	negative regulation of homeostatic process	0.0281	0.2941
O	1631	GO:0009164	nucleoside catabolic process	0.0281	0.25
O	1632	GO:0044237	cellular metabolic process	0.028	151.533
O	1633	GO:0010557	positive regulation of macromolecule biosynthetic process	0.028	15.5333
O	1634	GO:1990904	ribonucleoprotein complex	0.028	6.0333
O	1635	GO:0099512	supramolecular fiber	0.0279	4.3667
O	1636	GO:0043433	negative regulation of sequence-specific DNA binding transcription factor activity	0.0279	0.7333
O	1637	GO:0051186	cofactor metabolic process	0.0278	2.0667
O	1638	GO:0002262	myeloid cell homeostasis	0.0278	1
O	1639	GO:0050830	defense response to Gram-positive bacterium	0.0278	0.4286
O	1640	GO:0000983	transcription factor activity, RNA polymerase II core promoter sequence-specific	0.0278	0.4
O	1641	GO:0006664	glycolipid metabolic process	0.0278	0.3913
O	1642	GO:0043032	positive regulation of macrophage activation	0.0278	0.3333
O	1643	GO:0030804	positive regulation of cyclic nucleotide biosynthetic process	0.0278	0.3333
O	1644	GO:0045601	regulation of endothelial cell differentiation	0.0278	0.3
O	1645	GO:2000737	negative regulation of stem cell differentiation	0.0278	0.2
O	1646	GO:0050772	positive regulation of axonogenesis	0.0278	0.2
O	1647	GO:0045830	positive regulation of isotype switching	0.0278	0.2
O	1648	GO:0051497	negative regulation of stress fiber assembly	0.0278	0.1818
O	1649	GO:0097191	extrinsic apoptotic signaling pathway	0.0278	0.1429
O	1650	GO:0060674	placenta blood vessel development	0.0278	0.1429
O	1651	GO:0023026	MHC class II protein complex binding	0.0278	0.125
O	1652	GO:0009074	aromatic amino acid family catabolic process	0.0278	0.1071
O	1653	GO:0006693	prostaglandin metabolic process	0.0278	0.1053
O	1654	GO:0030018	Z disc	0.0278	0.0952
O	1655	GO:0005739	mitochondrion	0.0277	92.4667
O	1656	GO:0009888	tissue development	0.0277	2.1667
O	1657	GO:0061025	membrane fusion	0.0277	1.4667
O	1658	GO:0030278	regulation of ossification	0.0277	1.0357
O	1659	GO:0036152	phosphatidylethanolamine acyl-chain remodeling	0.0277	0.5667
O	1660	GO:0001205	transcriptional activator activity, RNA polymerase II distal enhancer sequence-specific binding	0.0277	0.4483
O	1661	GO:1902580	single-organism cellular localization	0.0276	3.5667
O	1662	GO:0008017	microtubule binding	0.0276	2.0345
O	1663	GO:1901568	fatty acid derivative metabolic process	0.0276	1.6
O	1664	GO:0046916	cellular transition metal ion homeostasis	0.0276	0.3846
O	1665	GO:0005794	Golgi apparatus	0.0275	27.9333
O	1666	GO:0072521	purine-containing compound metabolic process	0.0275	2.0667
O	1667	GO:0001763	morphogenesis of a branching structure	0.0275	0.2857
O	1668	GO:0043984	histone H4-K16 acetylation	0.0275	0.2414
O	1669	GO:0035966	response to topologically incorrect protein	0.0275	0.2308
O	1670	GO:0023061	signal release	0.0275	0.1818
O	1671	GO:0002755	MyD88-dependent toll-like receptor signaling pathway	0.0274	0.3333
O	1672	GO:0036150	phosphatidylserine acyl-chain remodeling	0.0274	0.3182
O	1673	GO:0048146	positive regulation of fibroblast proliferation	0.0274	0.2667
O	1674	GO:0045944	positive regulation of transcription from RNA polymerase II promoter	0.0273	9.4667
O	1675	GO:0048037	cofactor binding	0.0273	2.5667
O	1676	GO:0043370	regulation of CD4-positive, alpha-beta T cell differentiation	0.0273	0.25
O	1677	GO:0044702	single organism reproductive process	0.0272	2.2667
O	1678	GO:1901654	response to ketone	0.0272	0.7037
O	1679	GO:0051384	response to glucocorticoid	0.0272	0.2963
O	1680	GO:0010605	negative regulation of macromolecule metabolic process	0.0271	31.5
O	1681	GO:0010608	posttranscriptional regulation of gene expression	0.027	3.9
O	1682	GO:0051961	negative regulation of nervous system development	0.027	1.6333
O	1683	GO:0002790	peptide secretion	0.027	1.1111
O	1684	GO:1901606	alpha-amino acid catabolic process	0.027	1.1071
O	1685	GO:0046135	pyrimidine nucleoside catabolic process	0.027	0.1364
O	1686	GO:0031344	regulation of cell projection organization	0.0269	5.5
O	1687	GO:0043623	cellular protein complex assembly	0.0269	1.3
O	1688	GO:0019693	ribose phosphate metabolic process	0.0268	1.6667
O	1689	GO:0007272	ensheathment of neurons	0.0268	0.3333
O	1690	GO:0043168	anion binding	0.0267	40.0667
O	1691	GO:0055080	cation homeostasis	0.0267	2.8
O	1692	GO:0000987	core promoter proximal region sequence-specific DNA binding	0.0267	0.8125
O	1693	GO:0042383	sarcolemma	0.0267	0.4706
O	1694	GO:0032412	regulation of ion transmembrane transporter activity	0.0267	0.4375
O	1695	GO:0007052	mitotic spindle organization	0.0267	0.3462
O	1696	GO:0006998	nuclear envelope organization	0.0267	0.32
O	1697	GO:0031326	regulation of cellular biosynthetic process	0.0266	35.4667
O	1698	GO:0080135	regulation of cellular response to stress	0.0266	3.5
O	1699	GO:1901605	alpha-amino acid metabolic process	0.0266	2
O	1700	GO:0046883	regulation of hormone secretion	0.0266	0.6818
O	1701	GO:0048666	neuron development	0.0266	0.6552
O	1702	GO:0032420	stereocilium	0.0266	0.2727
O	1703	GO:0098772	molecular function regulator	0.0265	21.9333
O	1704	GO:0008610	lipid biosynthetic process	0.0265	3.6
O	1705	GO:0003924	GTPase activity	0.0265	1.1333
O	1706	GO:0005905	clathrin-coated pit	0.0265	0.5
O	1707	GO:0035094	response to nicotine	0.0264	0.25
O	1708	GO:0003730	mRNA 3'-UTR binding	0.0264	0.2381
O	1709	GO:0006811	ion transport	0.0263	15.2667
O	1710	GO:0006401	RNA catabolic process	0.0263	2.0345
O	1711	GO:0006639	acylglycerol metabolic process	0.0263	0.2963
O	1712	GO:0015026	coreceptor activity	0.0263	0.2333
O	1713	GO:0034660	ncRNA metabolic process	0.0262	1.3462
O	1714	GO:0045185	maintenance of protein location	0.0262	0.5652
O	1715	GO:0030529	intracellular ribonucleoprotein complex	0.0261	6
O	1716	GO:0045103	intermediate filament-based process	0.0261	0.25
O	1717	GO:0006996	organelle organization	0.026	25.3667
O	1718	GO:0004860	protein kinase inhibitor activity	0.026	0.6111
O	1719	GO:0031224	intrinsic component of membrane	0.0259	215.7
O	1720	GO:0044428	nuclear part	0.0259	98.6667
O	1721	GO:1902680	positive regulation of RNA biosynthetic process	0.0259	10.9
O	1722	GO:0004519	endonuclease activity	0.0259	0.931
O	1723	GO:0006807	nitrogen compound metabolic process	0.0258	69.8667
O	1724	GO:0043085	positive regulation of catalytic activity	0.0258	20.3
O	1725	GO:0016788	hydrolase activity, acting on ester bonds	0.0258	9.6333
O	1726	GO:0043604	amide biosynthetic process	0.0258	3.1
O	1727	GO:0000902	cell morphogenesis	0.0258	0.65
O	1728	GO:0072529	pyrimidine-containing compound catabolic process	0.0258	0.2692
O	1729	GO:0016021	integral component of membrane	0.0257	213.8
O	1730	GO:0009889	regulation of biosynthetic process	0.0257	34.1667
O	1731	GO:0071900	regulation of protein serine/threonine kinase activity	0.0257	3.9333
O	1732	GO:0006364	rRNA processing	0.0257	1.4615
O	1733	GO:0001960	negative regulation of cytokine-mediated signaling pathway	0.0256	0.75
O	1734	GO:0032330	regulation of chondrocyte differentiation	0.0256	0.3889
O	1735	GO:0048873	homeostasis of number of cells within a tissue	0.0256	0.2308
O	1736	GO:0002637	regulation of immunoglobulin production	0.0256	0.1875
O	1737	GO:1905369	endopeptidase complex	0.0255	0.75
O	1738	GO:0032580	Golgi cisterna membrane	0.0255	0.6333
O	1739	GO:0000502	proteasome complex	0.0255	0.4118
O	1740	GO:0044464	cell part	0.0254	519.167
O	1741	GO:0005488	binding	0.0254	429
O	1742	GO:0055076	transition metal ion homeostasis	0.0254	0.4167
O	1743	GO:0010556	regulation of macromolecule biosynthetic process	0.0253	36.3333
O	1744	GO:0002705	positive regulation of leukocyte mediated immunity	0.0253	0.4
O	1745	GO:0099572	postsynaptic specialization	0.0252	0.3793
O	1746	GO:0032844	regulation of homeostatic process	0.0251	1.2414
O	1747	GO:0051924	regulation of calcium ion transport	0.0251	1.04
O	1748	GO:0007178	transmembrane receptor protein serine/threonine kinase signaling pathway	0.0251	0.3077
O	1749	GO:0099513	polymeric cytoskeletal fiber	0.025	4.5667
O	1750	GO:0006874	cellular calcium ion homeostasis	0.025	1
O	1751	GO:0004713	protein tyrosine kinase activity	0.025	0.7586
O	1752	GO:1903202	negative regulation of oxidative stress-induced cell death	0.025	0.6667
O	1753	GO:0010565	regulation of cellular ketone metabolic process	0.025	0.5652
O	1754	GO:0031529	ruffle organization	0.025	0.2222
O	1755	GO:0009790	embryo development	0.025	0.2222
O	1756	GO:0032648	regulation of interferon-beta production	0.025	0.1875
O	1757	GO:0050691	regulation of defense response to virus by host	0.025	0.1538
O	1758	GO:0032873	negative regulation of stress-activated MAPK cascade	0.025	0.1538
O	1759	GO:0044711	single-organism biosynthetic process	0.0249	19.2667
O	1760	GO:0031397	negative regulation of protein ubiquitination	0.0249	0.375
O	1761	GO:0031032	actomyosin structure organization	0.0248	0.8571
O	1762	GO:0044246	regulation of multicellular organismal metabolic process	0.0248	0.4545
O	1763	GO:0044389	ubiquitin-like protein ligase binding	0.0247	0.5926
O	1764	GO:0009124	nucleoside monophosphate biosynthetic process	0.0247	0.25
O	1765	GO:0003674	molecular_function	0.0246	421.033
O	1766	GO:0004888	transmembrane signaling receptor activity	0.0246	7.8333
O	1767	GO:0098590	plasma membrane region	0.0246	7.8
O	1768	GO:0010720	positive regulation of cell development	0.0246	1.7667
O	1769	GO:0034754	cellular hormone metabolic process	0.0246	1.2333
O	1770	GO:0090263	positive regulation of canonical Wnt signaling pathway	0.0246	0.6316
O	1771	GO:0010468	regulation of gene expression	0.0245	78.2
O	1772	GO:0036094	small molecule binding	0.0245	26.1667
O	1773	GO:0005769	early endosome	0.0245	1.7
O	1774	GO:0043392	negative regulation of DNA binding	0.0245	0.4375
O	1775	GO:0045639	positive regulation of myeloid cell differentiation	0.0245	0.3529
O	1776	GO:0016310	phosphorylation	0.0244	7.4667
O	1777	GO:0001067	regulatory region nucleic acid binding	0.0244	6.2
O	1778	GO:0030258	lipid modification	0.0244	1.7667
O	1779	GO:0015197	peptide transporter activity	0.0244	0.7667
O	1780	GO:0001843	neural tube closure	0.0244	0.2667
O	1781	GO:0010821	regulation of mitochondrion organization	0.0242	0.4231
O	1782	GO:0005903	brush border	0.0242	0.2105
O	1783	GO:0099081	supramolecular polymer	0.0241	3.8
O	1784	GO:0006643	membrane lipid metabolic process	0.0241	1.3448
O	1785	GO:0048608	reproductive structure development	0.0241	1
O	1786	GO:0006334	nucleosome assembly	0.0241	0.3043
O	1787	GO:0045893	positive regulation of transcription, DNA-templated	0.024	10
O	1788	GO:0031301	integral component of organelle membrane	0.024	0.8667
O	1789	GO:0071230	cellular response to amino acid stimulus	0.024	0.2727
O	1790	GO:0008150	biological_process	0.0239	368.567
O	1791	GO:0006644	phospholipid metabolic process	0.0239	3.7
O	1792	GO:0019887	protein kinase regulator activity	0.0239	0.6522
O	1793	GO:0009890	negative regulation of biosynthetic process	0.0238	11.9333
O	1794	GO:0051345	positive regulation of hydrolase activity	0.0238	11.6
O	1795	GO:0016772	transferase activity, transferring phosphorus-containing groups	0.0238	11.5
O	1796	GO:0030030	cell projection organization	0.0238	4.1333
O	1797	GO:0043410	positive regulation of MAPK cascade	0.0238	2.9655
O	1798	GO:0051897	positive regulation of protein kinase B signaling	0.0238	0.6842
O	1799	GO:0030206	chondroitin sulfate biosynthetic process	0.0238	0.1429
O	1800	GO:1902806	regulation of cell cycle G1/S phase transition	0.0237	0.2
O	1801	GO:0009416	response to light stimulus	0.0236	2.8
O	1802	GO:0006875	cellular metal ion homeostasis	0.0236	1.6667
O	1803	GO:0070374	positive regulation of ERK1 and ERK2 cascade	0.0236	1.4
O	1804	GO:0030111	regulation of Wnt signaling pathway	0.0236	0.6429
O	1805	GO:0007154	cell communication	0.0234	7.8333
O	1806	GO:0097190	apoptotic signaling pathway	0.0234	1.037
O	1807	GO:0031398	positive regulation of protein ubiquitination	0.0234	0.7222
O	1808	GO:0005802	trans-Golgi network	0.0234	0.36
O	1809	GO:0046496	nicotinamide nucleotide metabolic process	0.0234	0.3448
O	1810	GO:0010591	regulation of lamellipodium assembly	0.0233	0.4
O	1811	GO:0014912	negative regulation of smooth muscle cell migration	0.0233	0.3333
O	1812	GO:0006903	vesicle targeting	0.0233	0.3333
O	1813	GO:1904590	negative regulation of protein import	0.0233	0.125
O	1814	GO:0009314	response to radiation	0.0232	4.1333
O	1815	GO:0016298	lipase activity	0.0232	1.3667
O	1816	GO:1905952	regulation of lipid localization	0.0232	0.8261
O	1817	GO:0031346	positive regulation of cell projection organization	0.0232	0.75
O	1818	GO:0008201	heparin binding	0.0232	0.5172
O	1819	GO:0060589	nucleoside-triphosphatase regulator activity	0.0231	7.2
O	1820	GO:0099080	supramolecular complex	0.0231	4.6333
O	1821	GO:0007610	behavior	0.0231	1.7586
O	1822	GO:0005253	anion channel activity	0.0231	0.3889
O	1823	GO:0043028	cysteine-type endopeptidase regulator activity involved in apoptotic process	0.0231	0.1905
O	1824	GO:0002312	B cell activation involved in immune response	0.0231	0.1905
O	1825	GO:0044463	cell projection part	0.023	2.4
O	1826	GO:0006869	lipid transport	0.023	1.8333
O	1827	GO:1901990	regulation of mitotic cell cycle phase transition	0.023	1.1923
O	1828	GO:0043393	regulation of protein binding	0.023	0.2083
O	1829	GO:0001750	photoreceptor outer segment	0.023	0.2
O	1830	GO:0009058	biosynthetic process	0.0229	39.3333
O	1831	GO:0015103	inorganic anion transmembrane transporter activity	0.0229	0.1765
O	1832	GO:0036464	cytoplasmic ribonucleoprotein granule	0.0229	0.1429
O	1833	GO:0007265	Ras protein signal transduction	0.0228	0.8929
O	1834	GO:0050710	negative regulation of cytokine secretion	0.0228	0.3333
O	1835	GO:0006575	cellular modified amino acid metabolic process	0.0227	1.4333
O	1836	GO:0002753	cytoplasmic pattern recognition receptor signaling pathway	0.0227	0.5556
O	1837	GO:0006767	water-soluble vitamin metabolic process	0.0227	0.5
O	1838	GO:0061077	chaperone-mediated protein folding	0.0227	0.4
O	1839	GO:0051171	regulation of nitrogen compound metabolic process	0.0226	42.7
O	1840	GO:0044265	cellular macromolecule catabolic process	0.0226	4.8
O	1841	GO:0072659	protein localization to plasma membrane	0.0226	1.2
O	1842	GO:0005777	peroxisome	0.0226	1
O	1843	GO:0016887	ATPase activity	0.0225	1.8667
O	1844	GO:0032652	regulation of interleukin-1 production	0.0225	0.3333
O	1845	GO:0042455	ribonucleoside biosynthetic process	0.0225	0.2143
O	1846	GO:0046850	regulation of bone remodeling	0.0225	0.1765
O	1847	GO:0003723	RNA binding	0.0224	30.5333
O	1848	GO:0006906	vesicle fusion	0.0224	0.6667
O	1849	GO:1902622	regulation of neutrophil migration	0.0224	0.5
O	1850	GO:0005096	GTPase activator activity	0.0223	5.1667
O	1851	GO:0006417	regulation of translation	0.0223	1.7333
O	1852	GO:0051962	positive regulation of nervous system development	0.0223	1.4667
O	1853	GO:0046942	carboxylic acid transport	0.0223	0.3333
O	1854	GO:0032722	positive regulation of chemokine production	0.0223	0.25
O	1855	GO:0035091	phosphatidylinositol binding	0.0222	2.5667
O	1856	GO:0015631	tubulin binding	0.0222	2.5667
O	1857	GO:0044144	modulation of growth of symbiont involved in interaction with host	0.0222	0.6
O	1858	GO:0071383	cellular response to steroid hormone stimulus	0.0222	0.4
O	1859	GO:0010640	regulation of platelet-derived growth factor receptor signaling pathway	0.0222	0.2
O	1860	GO:0048017	inositol lipid-mediated signaling	0.0222	0.1667
O	1861	GO:0051875	pigment granule localization	0.0222	0.125
O	1862	GO:0006468	protein phosphorylation	0.0221	6.5667
O	1863	GO:0046486	glycerolipid metabolic process	0.0221	4.3667
O	1864	GO:0010564	regulation of cell cycle process	0.0221	1.8929
O	1865	GO:0016301	kinase activity	0.022	5.8
O	1866	GO:0006650	glycerophospholipid metabolic process	0.022	3.4333
O	1867	GO:1903320	regulation of protein modification by small protein conjugation or removal	0.022	1.1481
O	1868	GO:0071478	cellular response to radiation	0.022	0.875
O	1869	GO:0050678	regulation of epithelial cell proliferation	0.022	0.7692
O	1870	GO:0006024	glycosaminoglycan biosynthetic process	0.022	0.75
O	1871	GO:0000790	nuclear chromatin	0.022	0.5333
O	1872	GO:0097159	organic cyclic compound binding	0.0219	82.3
O	1873	GO:0022892	substrate-specific transporter activity	0.0219	15.5333
O	1874	GO:0009117	nucleotide metabolic process	0.0219	3.1
O	1875	GO:1902582	single-organism intracellular transport	0.0219	1.3571
O	1876	GO:0019362	pyridine nucleotide metabolic process	0.0219	0.5
O	1877	GO:0007626	locomotory behavior	0.0219	0.5
O	1878	GO:0008134	transcription factor binding	0.0218	1.3667
O	1879	GO:0031300	intrinsic component of organelle membrane	0.0218	0.8276
O	1880	GO:0004712	protein serine/threonine/tyrosine kinase activity	0.0218	0.2174
O	1881	GO:0010506	regulation of autophagy	0.0217	1.069
O	1882	GO:0016125	sterol metabolic process	0.0217	0.2857
O	1883	GO:0019215	intermediate filament binding	0.0217	0.2308
O	1884	GO:0072341	modified amino acid binding	0.0217	0.16
O	1885	GO:1901363	heterocyclic compound binding	0.0215	75.4333
O	1886	GO:0006355	regulation of transcription, DNA-templated	0.0215	25.9667
O	1887	GO:0030414	peptidase inhibitor activity	0.0215	1.3667
O	1888	GO:0008202	steroid metabolic process	0.0215	1
O	1889	GO:0051806	entry into cell of other organism involved in symbiotic interaction	0.0215	0.4286
O	1890	GO:0009226	nucleotide-sugar biosynthetic process	0.0215	0.3
O	1891	GO:0050770	regulation of axonogenesis	0.0215	0.2632
O	1892	GO:0030968	endoplasmic reticulum unfolded protein response	0.0214	0.6538
O	1893	GO:0043691	reverse cholesterol transport	0.0214	0.5
O	1894	GO:0006890	retrograde vesicle-mediated transport, Golgi to ER	0.0214	0.4333
O	1895	GO:0055088	lipid homeostasis	0.0214	0.25
O	1896	GO:0098656	anion transmembrane transport	0.0214	0.2222
O	1897	GO:0005520	insulin-like growth factor binding	0.0214	0.2
O	1898	GO:1901576	organic substance biosynthetic process	0.0213	35.9
O	1899	GO:0051726	regulation of cell cycle	0.0213	6.5
O	1900	GO:0005815	microtubule organizing center	0.0213	3.8
O	1901	GO:0051928	positive regulation of calcium ion transport	0.0213	0.2727
O	1902	GO:1903506	regulation of nucleic acid-templated transcription	0.0212	27.8
O	1903	GO:0000166	nucleotide binding	0.0212	20.5667
O	1904	GO:0051056	regulation of small GTPase mediated signal transduction	0.0212	4.7333
O	1905	GO:0003714	transcription corepressor activity	0.0212	4.2
O	1906	GO:0016071	mRNA metabolic process	0.0212	3.4333
O	1907	GO:0072503	cellular divalent inorganic cation homeostasis	0.0212	1.0714
O	1908	GO:0051438	regulation of ubiquitin-protein transferase activity	0.0212	0.4545
O	1909	GO:0038061	NIK/NF-kappaB signaling	0.0212	0.3846
O	1910	GO:1901343	negative regulation of vasculature development	0.0212	0.2632
O	1911	GO:1901265	nucleoside phosphate binding	0.0211	17.3333
O	1912	GO:0099600	transmembrane receptor activity	0.0211	6.5
O	1913	GO:0046906	tetrapyrrole binding	0.0211	1.0667
O	1914	GO:0051117	ATPase binding	0.0211	0.2778
O	1915	GO:2000112	regulation of cellular macromolecule biosynthetic process	0.021	30.9
O	1916	GO:0048609	multicellular organismal reproductive process	0.021	0.4118
O	1917	GO:0030534	adult behavior	0.021	0.3448
O	1918	GO:0015459	potassium channel regulator activity	0.021	0.16
O	1919	GO:0006457	protein folding	0.0209	1.1333
O	1920	GO:0072507	divalent inorganic cation homeostasis	0.0209	0.9667
O	1921	GO:0001085	RNA polymerase II transcription factor binding	0.0209	0.8276
O	1922	GO:1901616	organic hydroxy compound catabolic process	0.0209	0.1154
O	1923	GO:0016818	hydrolase activity, acting on acid anhydrides, in phosphorus-containing anhydrides	0.0208	6
O	1924	GO:1905114	cell surface receptor signaling pathway involved in cell-cell signaling	0.0208	0.4667
O	1925	GO:0048639	positive regulation of developmental growth	0.0208	0.4
O	1926	GO:1903313	positive regulation of mRNA metabolic process	0.0208	0.3
O	1927	GO:0010923	negative regulation of phosphatase activity	0.0208	0.1111
O	1928	GO:0048147	negative regulation of fibroblast proliferation	0.0208	0.0833
O	1929	GO:0019219	regulation of nucleobase-containing compound metabolic process	0.0207	29.3667
O	1930	GO:0032561	guanyl ribonucleotide binding	0.0207	3.1667
O	1931	GO:0052689	carboxylic ester hydrolase activity	0.0207	1.069
O	1932	GO:0044267	cellular protein metabolic process	0.0206	26.9667
O	1933	GO:0006936	muscle contraction	0.0206	1
O	1934	GO:0051252	regulation of RNA metabolic process	0.0205	30.9
O	1935	GO:0050804	modulation of synaptic transmission	0.0205	0.6538
O	1936	GO:0009072	aromatic amino acid family metabolic process	0.0205	0.1538
O	1937	GO:0030658	transport vesicle membrane	0.0205	0.1364
O	1938	GO:0017016	Ras GTPase binding	0.0204	2.2333
O	1939	GO:0048284	organelle fusion	0.0204	0.6
O	1940	GO:0030182	neuron differentiation	0.0204	0.3704
O	1941	GO:0061036	positive regulation of cartilage development	0.0204	0.25
O	1942	GO:1903078	positive regulation of protein localization to plasma membrane	0.0204	0.2
O	1943	GO:0033363	secretory granule organization	0.0204	0.2
O	1944	GO:0022402	cell cycle process	0.0203	7.7667
O	1945	GO:0016773	phosphotransferase activity, alcohol group as acceptor	0.0203	6.4667
O	1946	GO:0051603	proteolysis involved in cellular protein catabolic process	0.0203	1.9333
O	1947	GO:1904666	regulation of ubiquitin protein ligase activity	0.0203	0.5333
O	1948	GO:0032555	purine ribonucleotide binding	0.0202	12.1333
O	1949	GO:2000021	regulation of ion homeostasis	0.0202	0.7308
O	1950	GO:0034641	cellular nitrogen compound metabolic process	0.0201	37.6667
O	1951	GO:0005622	intracellular	0.0201	15.5333
O	1952	GO:0048589	developmental growth	0.0201	0.7667
O	1953	GO:0043244	regulation of protein complex disassembly	0.0201	0.5625
O	1954	GO:0046824	positive regulation of nucleocytoplasmic transport	0.0201	0.4167
O	1955	GO:0002335	mature B cell differentiation	0.02	0.1875
O	1956	GO:0022412	cellular process involved in reproduction in multicellular organism	0.02	0.1579
O	1957	GO:0016605	PML body	0.02	0.1538
O	1958	GO:0048013	ephrin receptor signaling pathway	0.02	0.125
O	1959	GO:0008138	protein tyrosine/serine/threonine phosphatase activity	0.02	0.1154
O	1960	GO:0005215	transporter activity	0.0199	13.9333
O	1961	GO:0044456	synapse part	0.0198	2.3333
O	1962	GO:0032872	regulation of stress-activated MAPK cascade	0.0198	0.5217
O	1963	GO:0050796	regulation of insulin secretion	0.0198	0.4211
O	1964	GO:0010629	negative regulation of gene expression	0.0197	12.4333
O	1965	GO:0018193	peptidyl-amino acid modification	0.0197	5.5
O	1966	GO:0004672	protein kinase activity	0.0197	3.9667
O	1967	GO:0016757	transferase activity, transferring glycosyl groups	0.0197	2.2
O	1968	GO:0060491	regulation of cell projection assembly	0.0197	0.8333
O	1969	GO:0046128	purine ribonucleoside metabolic process	0.0197	0.4643
O	1970	GO:0017076	purine nucleotide binding	0.0196	10.7333
O	1971	GO:1990778	protein localization to cell periphery	0.0196	0.9286
O	1972	GO:0019199	transmembrane receptor protein kinase activity	0.0196	0.4
O	1973	GO:0097193	intrinsic apoptotic signaling pathway	0.0196	0.3462
O	1974	GO:0009308	amine metabolic process	0.0196	0.1379
O	1975	GO:0044249	cellular biosynthetic process	0.0195	29.7333
O	1976	GO:0009887	animal organ morphogenesis	0.0195	1.9333
O	1977	GO:0016779	nucleotidyltransferase activity	0.0195	1.2667
O	1978	GO:0006638	neutral lipid metabolic process	0.0195	0.3929
O	1979	GO:0035639	purine ribonucleoside triphosphate binding	0.0194	12
O	1980	GO:0004879	RNA polymerase II transcription factor activity, ligand-activated sequence-specific DNA binding	0.0194	0.25
O	1981	GO:1901998	toxin transport	0.0194	0.2222
O	1982	GO:0048640	negative regulation of developmental growth	0.0194	0.1818
O	1983	GO:0004012	phospholipid-translocating ATPase activity	0.0194	0.1429
O	1984	GO:0035305	negative regulation of dephosphorylation	0.0194	0.1304
O	1985	GO:0002889	regulation of immunoglobulin mediated immune response	0.0194	0.1111
O	1986	GO:0042552	myelination	0.0193	0.3448
O	1987	GO:0005575	cellular_component	0.0192	181.533
O	1988	GO:2001141	regulation of RNA biosynthetic process	0.0192	26.9667
O	1989	GO:0030695	GTPase regulator activity	0.0192	4.7333
O	1990	GO:0030163	protein catabolic process	0.0192	1.1724
O	1991	GO:0044260	cellular macromolecule metabolic process	0.0191	66.1
O	1992	GO:0051172	negative regulation of nitrogen compound metabolic process	0.0191	9.3333
O	1993	GO:0017111	nucleoside-triphosphatase activity	0.0191	5
O	1994	GO:0015399	primary active transmembrane transporter activity	0.0191	0.6522
O	1995	GO:0010389	regulation of G2/M transition of mitotic cell cycle	0.0191	0.625
O	1996	GO:0010811	positive regulation of cell-substrate adhesion	0.0191	0.5862
O	1997	GO:0043130	ubiquitin binding	0.0191	0.2941
O	1998	GO:2001020	regulation of response to DNA damage stimulus	0.0191	0.2667
[truncated: 3,020 more rows]

## Sheet: AllUnder
Table S20. Random Forest results ranking GO terms by their ability to predict a gene being classified as underexpressed in the global analysis.
Expression	Rank	GO ID	GO term	Probability	Precision
U	1	GO:0045275	respiratory chain complex III	0.408	2.8276
U	2	GO:0010510	regulation of acetyl-CoA biosynthetic process from pyruvate	0.3743	2.9667
U	3	GO:0006122	mitochondrial electron transport, ubiquinol to cytochrome c	0.3564	4.2759
U	4	GO:0005750	mitochondrial respiratory chain complex III	0.3507	3.4231
U	5	GO:0006085	acetyl-CoA biosynthetic process	0.3492	5.2333
U	6	GO:0048407	platelet-derived growth factor binding	0.3364	3.7
U	7	GO:0070069	cytochrome complex	0.2989	7.6
U	8	GO:0050812	regulation of acyl-CoA biosynthetic process	0.2885	2.8667
U	9	GO:0006099	tricarboxylic acid cycle	0.2807	23.3667
U	10	GO:0006101	citrate metabolic process	0.267	23.2667
U	11	GO:0072350	tricarboxylic acid metabolic process	0.2384	22.2
U	12	GO:0005583	fibrillar collagen trimer	0.2377	1.5
U	13	GO:0006107	oxaloacetate metabolic process	0.2168	1.1739
U	14	GO:0098803	respiratory chain complex	0.2143	49.1
U	15	GO:0097031	mitochondrial respiratory chain complex I biogenesis	0.2135	38.2667
U	16	GO:0010257	NADH dehydrogenase complex assembly	0.2095	34.1
U	17	GO:0016620	oxidoreductase activity, acting on the aldehyde or oxo group of donors, NAD or NADP as acceptor	0.2085	2.3667
U	18	GO:0007528	neuromuscular junction development	0.2039	1.6333
U	19	GO:0032981	mitochondrial respiratory chain complex I assembly	0.202	35.5
U	20	GO:0008137	NADH dehydrogenase (ubiquinone) activity	0.2008	10.8333
U	21	GO:0022900	electron transport chain	0.1969	77.4667
U	22	GO:0022904	respiratory electron transport chain	0.1938	75.2333
U	23	GO:0042762	regulation of sulfur metabolic process	0.1934	2.4444
U	24	GO:0006120	mitochondrial electron transport, NADH to ubiquinone	0.1883	10.1
U	25	GO:0003954	NADH dehydrogenase activity	0.1867	9.0333
U	26	GO:0098800	inner mitochondrial membrane protein complex	0.1865	98.6
U	27	GO:1990204	oxidoreductase complex	0.1854	55.5333
U	28	GO:0050136	NADH dehydrogenase (quinone) activity	0.1842	8.7667
U	29	GO:0045271	respiratory chain complex I	0.1832	8.9667
U	30	GO:0005747	mitochondrial respiratory chain complex I	0.1724	8.5333
U	31	GO:0030964	NADH dehydrogenase complex	0.1668	8.7931
U	32	GO:0006084	acetyl-CoA metabolic process	0.165	3.8
U	33	GO:0016903	oxidoreductase activity, acting on the aldehyde or oxo group of donors	0.1625	2.3571
U	34	GO:0042776	mitochondrial ATP synthesis coupled proton transport	0.1555	2.2069
U	35	GO:0098798	mitochondrial protein complex	0.1529	96.4667
U	36	GO:0006754	ATP biosynthetic process	0.151	2.0741
U	37	GO:0005753	mitochondrial proton-transporting ATP synthase complex	0.1502	1.4074
U	38	GO:0070271	protein complex biogenesis	0.1444	40.2667
U	39	GO:0016676	oxidoreductase activity, acting on a heme group of donors, oxygen as acceptor	0.1431	1.037
U	40	GO:0016655	oxidoreductase activity, acting on NAD(P)H, quinone or similar compound as acceptor	0.1422	9.0667
U	41	GO:0033108	mitochondrial respiratory chain complex assembly	0.1411	42.3
U	42	GO:0060174	limb bud formation	0.1379	0.4074
U	43	GO:0044455	mitochondrial membrane part	0.1373	181.667
U	44	GO:0016651	oxidoreductase activity, acting on NAD(P)H	0.1361	11.3667
U	45	GO:0015986	ATP synthesis coupled proton transport	0.1332	2.2069
U	46	GO:0019216	regulation of lipid metabolic process	0.1315	1.7037
U	47	GO:0043209	myelin sheath	0.1277	72.5
U	48	GO:0006123	mitochondrial electron transport, cytochrome c to oxygen	0.1256	1.6207
U	49	GO:0043457	regulation of cellular respiration	0.1244	1.1379
U	50	GO:1902600	hydrogen ion transmembrane transport	0.1229	22.1333
U	51	GO:0006818	hydrogen transport	0.1224	17.5
U	52	GO:0015992	proton transport	0.1222	20.8
U	53	GO:0051537	2 iron, 2 sulfur cluster binding	0.1214	3.1333
U	54	GO:0070208	protein heterotrimerization	0.1161	0.4815
U	55	GO:0051196	regulation of coenzyme metabolic process	0.1159	4.3667
U	56	GO:0019217	regulation of fatty acid metabolic process	0.1147	1.6667
U	57	GO:0046487	glyoxylate metabolic process	0.1145	2.5333
U	58	GO:0006734	NADH metabolic process	0.1132	2.2667
U	59	GO:0016675	oxidoreductase activity, acting on a heme group of donors	0.1129	1.28
U	60	GO:0051193	regulation of cofactor metabolic process	0.1126	5.0667
U	61	GO:0015078	hydrogen ion transmembrane transporter activity	0.1125	17.2
U	62	GO:0045259	proton-transporting ATP synthase complex	0.112	1.2308
U	63	GO:0019829	cation-transporting ATPase activity	0.111	0.45
U	64	GO:0060563	neuroepithelial cell differentiation	0.1108	0.4231
U	65	GO:0046933	proton-transporting ATP synthase activity, rotational mechanism	0.1075	0.6522
U	66	GO:0099131	ATP hydrolysis coupled ion transmembrane transport	0.1042	0.68
U	67	GO:0071230	cellular response to amino acid stimulus	0.1036	0.9333
U	68	GO:0006090	pyruvate metabolic process	0.1035	9.5
U	69	GO:0009124	nucleoside monophosphate biosynthetic process	0.1025	2
U	70	GO:0006091	generation of precursor metabolites and energy	0.0981	98.7
U	71	GO:0015985	energy coupled proton transport, down electrochemical gradient	0.0975	1.8889
U	72	GO:0000315	organellar large ribosomal subunit	0.0952	12.5
U	73	GO:0004129	cytochrome-c oxidase activity	0.0926	0.963
U	74	GO:0016469	proton-transporting two-sector ATPase complex	0.0925	1.1154
U	75	GO:0048041	focal adhesion assembly	0.0921	0.4444
U	76	GO:0030574	collagen catabolic process	0.092	16.9333
U	77	GO:0046031	ADP metabolic process	0.0908	1.5667
U	78	GO:0045263	proton-transporting ATP synthase complex, coupling factor F(o)	0.0903	0.3333
U	79	GO:0044085	cellular component biogenesis	0.0898	44.0333
U	80	GO:0006094	gluconeogenesis	0.0892	3.8
U	81	GO:0043648	dicarboxylic acid metabolic process	0.0879	7.2667
U	82	GO:0044243	multicellular organismal catabolic process	0.0872	17.2
U	83	GO:0010565	regulation of cellular ketone metabolic process	0.0867	1.32
U	84	GO:0009642	response to light intensity	0.0859	0.4667
U	85	GO:0005762	mitochondrial large ribosomal subunit	0.0856	11.5333
U	86	GO:0001568	blood vessel development	0.0855	1.2
U	87	GO:0005743	mitochondrial inner membrane	0.0852	301.033
U	88	GO:0006007	glucose catabolic process	0.085	0.5185
U	89	GO:0071616	acyl-CoA biosynthetic process	0.0847	7.7333
U	90	GO:1902495	transmembrane transporter complex	0.0843	3.7857
U	91	GO:0035384	thioester biosynthetic process	0.084	6.1333
U	92	GO:0015002	heme-copper terminal oxidase activity	0.0839	0.75
U	93	GO:0006006	glucose metabolic process	0.0833	13.7
U	94	GO:0046364	monosaccharide biosynthetic process	0.0833	3.4
U	95	GO:0019674	NAD metabolic process	0.0833	3.1667
U	96	GO:0032963	collagen metabolic process	0.0831	16.9
U	97	GO:0003207	cardiac chamber formation	0.0825	0.4286
U	98	GO:0006733	oxidoreduction coenzyme metabolic process	0.0822	11.3
U	99	GO:0015934	large ribosomal subunit	0.0816	12.3
U	100	GO:0044259	multicellular organismal macromolecule metabolic process	0.0808	16.0333
U	101	GO:0046496	nicotinamide nucleotide metabolic process	0.08	9.7333
U	102	GO:0009206	purine ribonucleoside triphosphate biosynthetic process	0.08	1.32
U	103	GO:0019319	hexose biosynthetic process	0.0798	3.4
U	104	GO:0009145	purine nucleoside triphosphate biosynthetic process	0.0797	3.5
U	105	GO:0009201	ribonucleoside triphosphate biosynthetic process	0.0792	1.2963
U	106	GO:0061620	glycolytic process through glucose-6-phosphate	0.0792	0.7143
U	107	GO:0035774	positive regulation of insulin secretion involved in cellular response to glucose stimulus	0.0792	0.44
U	108	GO:0006096	glycolytic process	0.0791	1.7667
U	109	GO:0046939	nucleotide phosphorylation	0.0787	1.1786
U	110	GO:0019866	organelle inner membrane	0.0786	295.433
U	111	GO:0003735	structural constituent of ribosome	0.0786	15.6667
U	112	GO:0022853	active ion transmembrane transporter activity	0.0779	0.7727
U	113	GO:0009168	purine ribonucleoside monophosphate biosynthetic process	0.0777	2.6207
U	114	GO:0016405	CoA-ligase activity	0.0773	0.6154
U	115	GO:0005746	mitochondrial respiratory chain	0.0773	0.5263
U	116	GO:0019362	pyridine nucleotide metabolic process	0.077	9.2667
U	117	GO:0099132	ATP hydrolysis coupled cation transmembrane transport	0.077	0.5909
U	118	GO:0006081	cellular aldehyde metabolic process	0.0765	2.2143
U	119	GO:0030199	collagen fibril organization	0.0763	2.1333
U	120	GO:0044236	multicellular organism metabolic process	0.075	18.2667
U	121	GO:0048485	sympathetic nervous system development	0.0745	0.4444
U	122	GO:0070469	respiratory chain	0.0743	0.6296
U	123	GO:0031966	mitochondrial membrane	0.0738	355.533
U	124	GO:0005761	mitochondrial ribosome	0.0738	2.0333
U	125	GO:0031163	metallo-sulfur cluster assembly	0.0734	1.4
U	126	GO:0006757	ATP generation from ADP	0.0734	1.3667
U	127	GO:0098660	inorganic ion transmembrane transport	0.0721	13.2333
U	128	GO:0030168	platelet activation	0.0721	0.32
U	129	GO:0009205	purine ribonucleoside triphosphate metabolic process	0.0716	4.3448
U	130	GO:0009142	nucleoside triphosphate biosynthetic process	0.0714	2.3
U	131	GO:0071331	cellular response to hexose stimulus	0.0712	1.9667
U	132	GO:0032835	glomerulus development	0.0712	0.4167
U	133	GO:0033177	proton-transporting two-sector ATPase complex, proton-transporting domain	0.0711	0.4444
U	134	GO:0005201	extracellular matrix structural constituent	0.0702	18.4
U	135	GO:0072524	pyridine-containing compound metabolic process	0.0692	9.1333
U	136	GO:0070125	mitochondrial translational elongation	0.0691	14.6667
U	137	GO:0044769	ATPase activity, coupled to transmembrane movement of ions, rotational mechanism	0.0687	0.3929
U	138	GO:0009127	purine nucleoside monophosphate biosynthetic process	0.0686	2.9333
U	139	GO:0071326	cellular response to monosaccharide stimulus	0.0684	2.6333
U	140	GO:0006735	NADH regeneration	0.0681	0.76
U	141	GO:0070126	mitochondrial translational termination	0.068	13.8667
U	142	GO:0005581	collagen trimer	0.068	7.8
U	143	GO:0007045	cell-substrate adherens junction assembly	0.0669	0.3704
U	144	GO:0030673	axolemma	0.0656	0.4286
U	145	GO:0046034	ATP metabolic process	0.0654	4.6897
U	146	GO:0044420	extracellular matrix component	0.0653	29.9333
U	147	GO:0000313	organellar ribosome	0.0653	1.7
U	148	GO:0016878	acid-thiol ligase activity	0.0653	0.8333
U	149	GO:0098796	membrane protein complex	0.0652	58.0333
U	150	GO:0090662	ATP hydrolysis coupled transmembrane transport	0.0649	0.5455
U	151	GO:0015672	monovalent inorganic cation transport	0.0643	23.8667
U	152	GO:0044391	ribosomal subunit	0.0639	12.1
U	153	GO:0006414	translational elongation	0.0631	12.7667
U	154	GO:0019318	hexose metabolic process	0.0629	10.4
U	155	GO:1990542	mitochondrial transmembrane transport	0.0624	4.2333
U	156	GO:0019838	growth factor binding	0.0624	1.5667
U	157	GO:0045277	respiratory chain complex IV	0.0624	0.4286
U	158	GO:0016226	iron-sulfur cluster assembly	0.0622	1
U	159	GO:0043624	cellular protein complex disassembly	0.062	12.1
U	160	GO:0044429	mitochondrial part	0.0619	634.9
U	161	GO:0006637	acyl-CoA metabolic process	0.0619	10.3667
U	162	GO:0015405	P-P-bond-hydrolysis-driven transmembrane transporter activity	0.0619	0.76
U	163	GO:0009251	glucan catabolic process	0.0619	0.2917
U	164	GO:0009199	ribonucleoside triphosphate metabolic process	0.0607	4.2
U	165	GO:0051205	protein insertion into membrane	0.0604	1.8
U	166	GO:0043014	alpha-tubulin binding	0.0604	0.9333
U	167	GO:0043241	protein complex disassembly	0.0603	12.2
U	168	GO:0043043	peptide biosynthetic process	0.0603	10.5
U	169	GO:0035383	thioester metabolic process	0.0599	10.0667
U	170	GO:0015980	energy derivation by oxidation of organic compounds	0.0599	2.3793
U	171	GO:0098655	cation transmembrane transport	0.0595	14.7
U	172	GO:0006415	translational termination	0.0589	11.8
U	173	GO:0009141	nucleoside triphosphate metabolic process	0.0585	6.0333
U	174	GO:0006165	nucleoside diphosphate phosphorylation	0.0585	1.2
U	175	GO:0009055	electron carrier activity	0.058	2.3333
U	176	GO:0005840	ribosome	0.0578	2
U	177	GO:0009179	purine ribonucleoside diphosphate metabolic process	0.0578	1.2143
U	178	GO:0009185	ribonucleoside diphosphate metabolic process	0.0578	1.1379
U	179	GO:0098662	inorganic cation transmembrane transport	0.0565	12.7667
U	180	GO:0008324	cation transmembrane transporter activity	0.0562	11.3333
U	181	GO:0060026	convergent extension	0.0561	0.24
U	182	GO:0001838	embryonic epithelial tube formation	0.0556	0.2143
U	183	GO:0061718	glucose catabolic process to pyruvate	0.0553	0.5172
U	184	GO:0009295	nucleoid	0.0549	0.32
U	185	GO:0009156	ribonucleoside monophosphate biosynthetic process	0.0544	1.5
U	186	GO:0015077	monovalent inorganic cation transmembrane transporter activity	0.0538	20.4333
U	187	GO:0006412	translation	0.0536	10.3
U	188	GO:0021782	glial cell development	0.0536	0.3462
U	189	GO:0071333	cellular response to glucose stimulus	0.0534	1.6667
U	190	GO:0050662	coenzyme binding	0.0534	1.3
U	191	GO:0032024	positive regulation of insulin secretion	0.0532	1.1379
U	192	GO:0009126	purine nucleoside monophosphate metabolic process	0.0531	5.3
U	193	GO:0043200	response to amino acid	0.0524	0.8214
U	194	GO:0048514	blood vessel morphogenesis	0.0519	0.3929
U	195	GO:0051188	cofactor biosynthetic process	0.0517	27.4667
U	196	GO:0003713	transcription coactivator activity	0.0514	0.2353
U	197	GO:0006839	mitochondrial transport	0.0513	21.1667
U	198	GO:0009167	purine ribonucleoside monophosphate metabolic process	0.0511	7.4333
U	199	GO:0016836	hydro-lyase activity	0.0506	4.1667
U	200	GO:0009743	response to carbohydrate	0.0506	2.8667
U	201	GO:0006518	peptide metabolic process	0.0502	6.9667
U	202	GO:0032452	histone demethylase activity	0.05	1.4333
U	203	GO:0009161	ribonucleoside monophosphate metabolic process	0.0499	5.9667
U	204	GO:0031233	intrinsic component of external side of plasma membrane	0.0498	0.3333
U	205	GO:0006812	cation transport	0.0497	13.3333
U	206	GO:0021762	substantia nigra development	0.0497	1.3448
U	207	GO:0042407	cristae formation	0.0497	0.3571
U	208	GO:0010594	regulation of endothelial cell migration	0.0495	0.24
U	209	GO:0010522	regulation of calcium ion transport into cytosol	0.0491	0.381
U	210	GO:0051540	metal cluster binding	0.0489	3.9333
U	211	GO:0043604	amide biosynthetic process	0.0488	9.6
U	212	GO:0043623	cellular protein complex assembly	0.0486	43.1667
U	213	GO:0009144	purine nucleoside triphosphate metabolic process	0.0485	5.1
U	214	GO:0006732	coenzyme metabolic process	0.0484	21.9333
U	215	GO:0009066	aspartate family amino acid metabolic process	0.0483	0.25
U	216	GO:0005739	mitochondrion	0.0482	615.5
U	217	GO:0005996	monosaccharide metabolic process	0.0482	7.4
U	218	GO:0021510	spinal cord development	0.0481	0.3846
U	219	GO:0005759	mitochondrial matrix	0.0478	59.0667
U	220	GO:0070076	histone lysine demethylation	0.0476	1.5333
U	221	GO:0009135	purine nucleoside diphosphate metabolic process	0.0474	1.1
U	222	GO:0022891	substrate-specific transmembrane transporter activity	0.0473	24.3
U	223	GO:0071322	cellular response to carbohydrate stimulus	0.0473	1.8333
U	224	GO:0006811	ion transport	0.0472	27.7333
U	225	GO:0090140	regulation of mitochondrial fission	0.0472	0.2667
U	226	GO:0010907	positive regulation of glucose metabolic process	0.0471	1.2759
U	227	GO:0006779	porphyrin-containing compound biosynthetic process	0.0469	0.5
U	228	GO:0032984	macromolecular complex disassembly	0.0468	10.8
U	229	GO:0050808	synapse organization	0.0465	1.2667
U	230	GO:0016820	hydrolase activity, acting on acid anhydrides, catalyzing transmembrane movement of substances	0.0461	0.625
U	231	GO:0016614	oxidoreductase activity, acting on CH-OH group of donors	0.0461	0.6071
U	232	GO:0030032	lamellipodium assembly	0.046	0.5556
U	233	GO:0034333	adherens junction assembly	0.0459	0.2143
U	234	GO:0034220	ion transmembrane transport	0.0458	16.9667
U	235	GO:0043603	cellular amide metabolic process	0.0457	7.8333
U	236	GO:0042626	ATPase activity, coupled to transmembrane movement of substances	0.0455	0.65
U	237	GO:0043467	regulation of generation of precursor metabolites and energy	0.0444	3.6
U	238	GO:0014910	regulation of smooth muscle cell migration	0.0444	0.5
U	239	GO:0099516	ion antiporter activity	0.044	0.5
U	240	GO:0010649	regulation of cell communication by electrical coupling	0.044	0.2273
U	241	GO:0055085	transmembrane transport	0.0438	13.5667
U	242	GO:0030521	androgen receptor signaling pathway	0.0437	0.2143
U	243	GO:0022890	inorganic cation transmembrane transporter activity	0.0436	16.4
U	244	GO:0009108	coenzyme biosynthetic process	0.0432	4.4
U	245	GO:2000146	negative regulation of cell motility	0.0426	0.1429
U	246	GO:0009060	aerobic respiration	0.0425	0.1905
U	247	GO:0009123	nucleoside monophosphate metabolic process	0.0424	5.1
U	248	GO:0045333	cellular respiration	0.0424	1.1379
U	249	GO:0015075	ion transmembrane transporter activity	0.0423	31.1333
U	250	GO:0072521	purine-containing compound metabolic process	0.0422	3.6667
U	251	GO:0016051	carbohydrate biosynthetic process	0.042	2.6
U	252	GO:0007006	mitochondrial membrane organization	0.042	1.2333
U	253	GO:0015399	primary active transmembrane transporter activity	0.042	0.68
U	254	GO:0051186	cofactor metabolic process	0.0419	46.3667
U	255	GO:0048857	neural nucleus development	0.0419	1.8
U	256	GO:0016052	carbohydrate catabolic process	0.0418	1.4333
U	257	GO:0030426	growth cone	0.0417	1.0333
U	258	GO:0045820	negative regulation of glycolytic process	0.0417	0.1538
U	259	GO:0009117	nucleotide metabolic process	0.0416	15.3333
U	260	GO:0007599	hemostasis	0.0416	0.4
U	261	GO:0016577	histone demethylation	0.0413	1.4333
U	262	GO:0005604	basement membrane	0.0412	0.8621
U	263	GO:0042593	glucose homeostasis	0.041	1.8667
U	264	GO:0061178	regulation of insulin secretion involved in cellular response to glucose stimulus	0.041	0.1364
U	265	GO:0010676	positive regulation of cellular carbohydrate metabolic process	0.0407	1.0333
U	266	GO:0046677	response to antibiotic	0.0403	0.6897
U	267	GO:0044723	single-organism carbohydrate metabolic process	0.0401	11.8
U	268	GO:0046390	ribose phosphate biosynthetic process	0.0401	1.8462
U	269	GO:0016747	transferase activity, transferring acyl groups other than amino-acyl groups	0.0401	0.25
U	270	GO:0006753	nucleoside phosphate metabolic process	0.0399	14.8333
U	271	GO:1903779	regulation of cardiac conduction	0.0399	1.5
U	272	GO:0033500	carbohydrate homeostasis	0.0397	1.6333
U	273	GO:0048037	cofactor binding	0.0394	4.9333
U	274	GO:0009101	glycoprotein biosynthetic process	0.0393	0.1739
U	275	GO:0031362	anchored component of external side of plasma membrane	0.0391	0.2667
U	276	GO:0034284	response to monosaccharide	0.039	2.9
U	277	GO:0033617	mitochondrial respiratory chain complex IV assembly	0.0389	0.4138
U	278	GO:0022857	transmembrane transporter activity	0.0387	20
U	279	GO:0008535	respiratory chain complex IV assembly	0.0386	0.3704
U	280	GO:0051536	iron-sulfur cluster binding	0.0384	2.8
U	281	GO:0001678	cellular glucose homeostasis	0.0384	1.2414
U	282	GO:0002708	positive regulation of lymphocyte mediated immunity	0.0384	0.125
U	283	GO:0019693	ribose phosphate metabolic process	0.0383	3.8667
U	284	GO:0055086	nucleobase-containing small molecule metabolic process	0.0378	12.2
U	285	GO:0006119	oxidative phosphorylation	0.0378	0.3333
U	286	GO:0071774	response to fibroblast growth factor	0.0377	0.4828
U	287	GO:0061615	glycolytic process through fructose-6-phosphate	0.0375	0.3846
U	288	GO:0044264	cellular polysaccharide metabolic process	0.0375	0.1667
U	289	GO:0070206	protein trimerization	0.0374	0.4231
U	290	GO:0022411	cellular component disassembly	0.0372	9.8
U	291	GO:0097034	mitochondrial respiratory chain complex IV biogenesis	0.0371	0.5172
U	292	GO:0044272	sulfur compound biosynthetic process	0.037	5.6333
U	293	GO:0031312	extrinsic component of organelle membrane	0.0367	0.4828
U	294	GO:0030324	lung development	0.0364	0.2667
U	295	GO:0006163	purine nucleotide metabolic process	0.0363	4.4667
U	296	GO:1901564	organonitrogen compound metabolic process	0.0361	20.2
U	297	GO:0006778	porphyrin-containing compound metabolic process	0.0359	0.4
U	298	GO:0009152	purine ribonucleotide biosynthetic process	0.0356	1.6071
U	299	GO:0016877	ligase activity, forming carbon-sulfur bonds	0.0355	0.6154
U	300	GO:0022892	substrate-specific transporter activity	0.0353	18.6333
U	301	GO:0005198	structural molecule activity	0.0352	27.5667
U	302	GO:0044712	single-organism catabolic process	0.0352	12.9333
U	303	GO:0009150	purine ribonucleotide metabolic process	0.0352	5.5667
U	304	GO:1902494	catalytic complex	0.035	35.2667
U	305	GO:0044325	ion channel binding	0.035	2.3
U	306	GO:0050900	leukocyte migration	0.035	0.3929
U	307	GO:0070013	intracellular organelle lumen	0.0347	70.2
U	308	GO:0032592	integral component of mitochondrial membrane	0.0347	0.0769
U	309	GO:0009259	ribonucleotide metabolic process	0.0346	3.8
U	310	GO:1901293	nucleoside phosphate biosynthetic process	0.0346	1.6552
U	311	GO:0030522	intracellular receptor signaling pathway	0.0346	0.1818
U	312	GO:0006461	protein complex assembly	0.0343	19.9333
U	313	GO:0031974	membrane-enclosed lumen	0.0342	66.1
U	314	GO:0032451	demethylase activity	0.0341	2.4
U	315	GO:0071229	cellular response to acid chemical	0.0341	1.069
U	316	GO:0019752	carboxylic acid metabolic process	0.034	14.4333
U	317	GO:0032787	monocarboxylic acid metabolic process	0.0339	6.3667
U	318	GO:0072522	purine-containing compound biosynthetic process	0.0338	1.4667
U	319	GO:0071822	protein complex subunit organization	0.0337	52.0667
U	320	GO:0043436	oxoacid metabolic process	0.0337	16.7333
U	321	GO:0005975	carbohydrate metabolic process	0.0337	8.3
U	322	GO:0043233	organelle lumen	0.0336	76.2
U	323	GO:0016491	oxidoreductase activity	0.0336	56.9333
U	324	GO:0005215	transporter activity	0.0336	14.9667
U	325	GO:0043933	macromolecular complex subunit organization	0.0335	36.6
U	326	GO:0007584	response to nutrient	0.0335	2.7667
U	327	GO:0033014	tetrapyrrole biosynthetic process	0.0335	0.5333
U	328	GO:0060562	epithelial tube morphogenesis	0.0333	1.6
U	329	GO:0051195	negative regulation of cofactor metabolic process	0.0333	0.2222
U	330	GO:0032271	regulation of protein polymerization	0.0333	0.1818
U	331	GO:1903205	regulation of hydrogen peroxide-induced cell death	0.0333	0.1429
U	332	GO:0045454	cell redox homeostasis	0.0333	0.0455
U	333	GO:0050796	regulation of insulin secretion	0.0332	1.1333
U	334	GO:0034622	cellular macromolecular complex assembly	0.033	23.3667
U	335	GO:0030099	myeloid cell differentiation	0.0329	0.5333
U	336	GO:0009260	ribonucleotide biosynthetic process	0.0326	1.6207
U	337	GO:1903578	regulation of ATP metabolic process	0.0322	0.5714
U	338	GO:0031090	organelle membrane	0.0321	157.933
U	339	GO:0008214	protein dealkylation	0.0321	0.9333
U	340	GO:0009746	response to hexose	0.032	1.5
U	341	GO:0006164	purine nucleotide biosynthetic process	0.0319	1.4828
U	342	GO:0002065	columnar/cuboidal epithelial cell differentiation	0.0319	0.2069
U	343	GO:0036294	cellular response to decreased oxygen levels	0.0318	1.2333
U	344	GO:0017004	cytochrome complex assembly	0.0317	0.5517
U	345	GO:0055114	oxidation-reduction process	0.0316	52.6
U	346	GO:0090277	positive regulation of peptide hormone secretion	0.0313	1.9
U	347	GO:0006082	organic acid metabolic process	0.0312	14.4667
U	348	GO:0030276	clathrin binding	0.031	3.7667
U	349	GO:0009749	response to glucose	0.0308	1.3333
U	350	GO:0060413	atrial septum morphogenesis	0.0308	0.3333
U	351	GO:1903580	positive regulation of ATP metabolic process	0.0308	0.15
U	352	GO:0016835	carbon-oxygen lyase activity	0.0307	3.6
U	353	GO:0043588	skin development	0.0306	0.4
U	354	GO:0005788	endoplasmic reticulum lumen	0.0303	11.2
U	355	GO:1902578	single-organism localization	0.0302	28.9667
U	356	GO:0001101	response to acid chemical	0.0302	2.0667
U	357	GO:0014075	response to amine	0.0301	0.6
U	358	GO:1990351	transporter complex	0.0299	4.931
U	359	GO:0014074	response to purine-containing compound	0.0294	2.3667
U	360	GO:0051287	NAD binding	0.0294	0.8333
U	361	GO:0001501	skeletal system development	0.0293	1.7333
U	362	GO:1903037	regulation of leukocyte cell-cell adhesion	0.0293	1.4333
U	363	GO:1904427	positive regulation of calcium ion transmembrane transport	0.0292	0.25
U	364	GO:0044281	small molecule metabolic process	0.0291	49.9667
U	365	GO:1901135	carbohydrate derivative metabolic process	0.029	2.9333
U	366	GO:0031345	negative regulation of cell projection organization	0.029	0.4615
U	367	GO:0050770	regulation of axonogenesis	0.029	0.1304
U	368	GO:0044724	single-organism carbohydrate catabolic process	0.0287	0.8621
U	369	GO:0019320	hexose catabolic process	0.0286	0.5385
U	370	GO:0031098	stress-activated protein kinase signaling cascade	0.0286	0.3333
U	371	GO:0006790	sulfur compound metabolic process	0.0285	14.2333
U	372	GO:0044710	single-organism metabolic process	0.0283	135.333
U	373	GO:0030055	cell-substrate junction	0.0283	0.3077
U	374	GO:1900542	regulation of purine nucleotide metabolic process	0.0282	1.1034
U	375	GO:0060560	developmental growth involved in morphogenesis	0.0282	0.4667
U	376	GO:0043062	extracellular structure organization	0.028	10.2667
U	377	GO:0008514	organic anion transmembrane transporter activity	0.0279	0.3462
U	378	GO:0090200	positive regulation of release of cytochrome c from mitochondria	0.0278	0.4333
U	379	GO:0060999	positive regulation of dendritic spine development	0.0278	0.3103
U	380	GO:0051291	protein heterooligomerization	0.0278	0.2273
U	381	GO:0045722	positive regulation of gluconeogenesis	0.0278	0.1111
U	382	GO:0010962	regulation of glucan biosynthetic process	0.0277	0.2083
U	383	GO:0019637	organophosphate metabolic process	0.0276	14.1667
U	384	GO:1901566	organonitrogen compound biosynthetic process	0.0276	13.6
U	385	GO:0007005	mitochondrion organization	0.0276	7.1
U	386	GO:0071456	cellular response to hypoxia	0.0276	0.8
U	387	GO:0044765	single-organism transport	0.0274	25.6667
U	388	GO:0031594	neuromuscular junction	0.0271	0.6786
U	389	GO:0007007	inner mitochondrial membrane organization	0.027	0.3448
U	390	GO:2000145	regulation of cell motility	0.0269	1.3667
U	391	GO:0043255	regulation of carbohydrate biosynthetic process	0.0268	0.6897
U	392	GO:0046685	response to arsenic-containing substance	0.0268	0.2222
U	393	GO:0060411	cardiac septum morphogenesis	0.0267	1.0333
U	394	GO:0000792	heterochromatin	0.0266	2.7667
U	395	GO:0046683	response to organophosphorus	0.0266	0.8929
U	396	GO:1900006	positive regulation of dendrite development	0.0266	0.8
U	397	GO:0065003	macromolecular complex assembly	0.0265	12.8
U	398	GO:0008022	protein C-terminus binding	0.0263	0.6667
U	399	GO:0070988	demethylation	0.0261	2.2667
U	400	GO:0006109	regulation of carbohydrate metabolic process	0.0261	1.2
U	401	GO:0070585	protein localization to mitochondrion	0.0259	1.4
U	402	GO:0002440	production of molecular mediator of immune response	0.0259	0.7
U	403	GO:0010771	negative regulation of cell morphogenesis involved in differentiation	0.0258	0.4231
U	404	GO:0022804	active transmembrane transporter activity	0.0256	2.7667
U	405	GO:0046883	regulation of hormone secretion	0.0255	3.2759
U	406	GO:0051591	response to cAMP	0.0255	0.8667
U	407	GO:0006482	protein demethylation	0.0255	0.8333
U	408	GO:0030198	extracellular matrix organization	0.0254	9.4333
U	409	GO:0051560	mitochondrial calcium ion homeostasis	0.0254	0.2414
U	410	GO:0009058	biosynthetic process	0.0253	53.5667
U	411	GO:0060314	regulation of ryanodine-sensitive calcium-release channel activity	0.0253	0.1579
U	412	GO:1901576	organic substance biosynthetic process	0.0252	45.2667
U	413	GO:0031960	response to corticosteroid	0.0252	0.68
U	414	GO:0030427	site of polarized growth	0.025	0.9333
U	415	GO:0046887	positive regulation of hormone secretion	0.0249	1.8
U	416	GO:1903169	regulation of calcium ion transmembrane transport	0.0249	0.3478
U	417	GO:0061077	chaperone-mediated protein folding	0.0249	0.2857
U	418	GO:0044249	cellular biosynthetic process	0.0248	39.5333
U	419	GO:0061621	canonical glycolysis	0.0248	0.3214
U	420	GO:0051493	regulation of cytoskeleton organization	0.0246	0.4828
U	421	GO:0042625	ATPase coupled ion transmembrane transporter activity	0.0246	0.3333
U	422	GO:0032846	positive regulation of homeostatic process	0.0245	2.7
U	423	GO:0035864	response to potassium ion	0.0245	0.1034
U	424	GO:0015197	peptide transporter activity	0.0244	0.2917
U	425	GO:0051281	positive regulation of release of sequestered calcium ion into cytosol	0.0244	0.25
U	426	GO:0043280	positive regulation of cysteine-type endopeptidase activity involved in apoptotic process	0.0243	0.5517
U	427	GO:0032991	macromolecular complex	0.0242	206.733
U	428	GO:0010035	response to inorganic substance	0.0242	5.4667
U	429	GO:0022898	regulation of transmembrane transporter activity	0.0242	0.9
U	430	GO:2000181	negative regulation of blood vessel morphogenesis	0.0242	0.2963
U	431	GO:0050870	positive regulation of T cell activation	0.024	1.6
U	432	GO:0002793	positive regulation of peptide secretion	0.0239	1.9333
U	433	GO:0006110	regulation of glycolytic process	0.0238	0.3182
U	434	GO:0043234	protein complex	0.0237	85.2333
U	435	GO:0003723	RNA binding	0.0237	19.6333
U	436	GO:1901137	carbohydrate derivative biosynthetic process	0.0237	1.3667
U	437	GO:0060412	ventricular septum morphogenesis	0.0236	0.2759
U	438	GO:0090279	regulation of calcium ion import	0.0234	0.9333
U	439	GO:0098727	maintenance of cell number	0.0234	0.2857
U	440	GO:1903532	positive regulation of secretion by cell	0.0233	3.1333
U	441	GO:0044711	single-organism biosynthetic process	0.0232	24.5667
U	442	GO:0007167	enzyme linked receptor protein signaling pathway	0.0232	2.2
U	443	GO:0015301	anion	0.0232	0.2963
U	444	GO:0050670	regulation of lymphocyte proliferation	0.0231	0.3214
U	445	GO:1905515	non-motile cilium assembly	0.0231	0.1154
U	446	GO:0050863	regulation of T cell activation	0.023	1.7333
U	447	GO:0045778	positive regulation of ossification	0.023	0.1579
U	448	GO:1903039	positive regulation of leukocyte cell-cell adhesion	0.0228	1.5
U	449	GO:0016887	ATPase activity	0.0227	0.6667
U	450	GO:0051272	positive regulation of cellular component movement	0.0227	0.2759
U	451	GO:0072655	establishment of protein localization to mitochondrion	0.0226	0.6
U	452	GO:0000794	condensed nuclear chromosome	0.0225	0.1667
U	453	GO:0044271	cellular nitrogen compound biosynthetic process	0.0224	16.2333
U	454	GO:0022409	positive regulation of cell-cell adhesion	0.0224	1.3
U	455	GO:0048015	phosphatidylinositol-mediated signaling	0.0224	0.2593
U	456	GO:0007169	transmembrane receptor protein tyrosine kinase signaling pathway	0.0223	2.0333
U	457	GO:0010977	negative regulation of neuron projection development	0.0223	0.5357
U	458	GO:0034767	positive regulation of ion transmembrane transport	0.0223	0.5172
U	459	GO:0043281	regulation of cysteine-type endopeptidase activity involved in apoptotic process	0.0222	0.7667
U	460	GO:0002764	immune response-regulating signaling pathway	0.0222	0.1818
U	461	GO:1901654	response to ketone	0.0222	0.125
U	462	GO:0009132	nucleoside diphosphate metabolic process	0.0221	0.5667
U	463	GO:0010243	response to organonitrogen compound	0.022	8.1333
U	464	GO:0002891	positive regulation of immunoglobulin mediated immune response	0.0219	0.2414
U	465	GO:1901343	negative regulation of vasculature development	0.0219	0.2069
U	466	GO:0045216	cell-cell junction organization	0.0218	4.5
U	467	GO:0051251	positive regulation of lymphocyte activation	0.0218	1.6
U	468	GO:0045239	tricarboxylic acid cycle enzyme complex	0.0217	0.16
U	469	GO:0035239	tube morphogenesis	0.0216	2.5667
U	470	GO:0071453	cellular response to oxygen levels	0.0216	0.8667
U	471	GO:0043230	extracellular organelle	0.0215	133.167
U	472	GO:0042493	response to drug	0.0215	3.2667
U	473	GO:0010942	positive regulation of cell death	0.0215	1.3
U	474	GO:0050708	regulation of protein secretion	0.0215	1.2
U	475	GO:0070062	extracellular exosome	0.0214	143.467
U	476	GO:0050776	regulation of immune response	0.0214	2
U	477	GO:0045995	regulation of embryonic development	0.0214	0.24
U	478	GO:0019898	extrinsic component of membrane	0.0213	0.6667
U	479	GO:1904062	regulation of cation transmembrane transport	0.0212	2.2
U	480	GO:0045913	positive regulation of carbohydrate metabolic process	0.0212	0.8621
U	481	GO:0051279	regulation of release of sequestered calcium ion into cytosol	0.0212	0.56
U	482	GO:0002244	hematopoietic progenitor cell differentiation	0.0211	2.3
U	483	GO:0051047	positive regulation of secretion	0.0211	2.2667
U	484	GO:0002696	positive regulation of leukocyte activation	0.0211	1.9
U	485	GO:0050771	negative regulation of axonogenesis	0.0211	0.2414
U	486	GO:1903561	extracellular vesicle	0.021	137.033
U	487	GO:0006807	nitrogen compound metabolic process	0.021	26.6333
U	488	GO:2001257	regulation of cation channel activity	0.021	0.8333
U	489	GO:0071417	cellular response to organonitrogen compound	0.0209	3.2
U	490	GO:0036293	response to decreased oxygen levels	0.0209	1.2
U	491	GO:0005905	clathrin-coated pit	0.0209	0.5667
U	492	GO:0009791	post-embryonic development	0.0209	0.5333
U	493	GO:0015931	nucleobase-containing compound transport	0.0209	0.4444
U	494	GO:0060271	cilium assembly	0.0208	11.7
U	495	GO:0034330	cell junction organization	0.0208	4.7
U	496	GO:0046578	regulation of Ras protein signal transduction	0.0208	0.5172
U	497	GO:0051099	positive regulation of binding	0.0208	0.25
U	498	GO:0051592	response to calcium ion	0.0207	1.4
U	499	GO:0002639	positive regulation of immunoglobulin production	0.0207	0.1786
U	500	GO:0050867	positive regulation of cell activation	0.0206	1.3333
U	501	GO:0046942	carboxylic acid transport	0.0206	0.4762
U	502	GO:0034702	ion channel complex	0.0206	0.4643
U	503	GO:0010823	negative regulation of mitochondrion organization	0.0206	0.2273
U	504	GO:0044344	cellular response to fibroblast growth factor stimulus	0.0206	0.125
U	505	GO:1901701	cellular response to oxygen-containing compound	0.0205	5.1333
U	506	GO:0006140	regulation of nucleotide metabolic process	0.0205	1.2308
U	507	GO:0016829	lyase activity	0.0204	4.4667
U	508	GO:0005980	glycogen catabolic process	0.0204	0.0952
U	509	GO:1901698	response to nitrogen compound	0.0203	7.4667
U	510	GO:0016328	lateral plasma membrane	0.0203	0.2143
U	511	GO:0007507	heart development	0.0202	3.4667
U	512	GO:0090087	regulation of peptide transport	0.0202	1.2
U	513	GO:0003012	muscle system process	0.0202	0.931
U	514	GO:0016616	oxidoreductase activity, acting on the CH-OH group of donors, NAD or NADP as acceptor	0.0202	0.4667
U	515	GO:0044421	extracellular region part	0.0201	137.7
U	516	GO:0090276	regulation of peptide hormone secretion	0.0201	2.2
U	517	GO:0006089	lactate metabolic process	0.0201	0.2
U	518	GO:0001104	RNA polymerase II transcription cofactor activity	0.02	0.4167
U	519	GO:0034612	response to tumor necrosis factor	0.02	0.3478
U	520	GO:0031305	integral component of mitochondrial inner membrane	0.02	0.1111
U	521	GO:0010950	positive regulation of endopeptidase activity	0.0199	0.4667
U	522	GO:0034703	cation channel complex	0.0198	0.7143
U	523	GO:0022407	regulation of cell-cell adhesion	0.0197	1.6667
U	524	GO:2000756	regulation of peptidyl-lysine acetylation	0.0197	0.1111
U	525	GO:0021549	cerebellum development	0.0197	0.0769
U	526	GO:0032354	response to follicle-stimulating hormone	0.0196	0.1111
U	527	GO:0043231	intracellular membrane-bounded organelle	0.0195	218.5
U	528	GO:0000302	response to reactive oxygen species	0.0194	1.7333
U	529	GO:0043414	macromolecule methylation	0.0194	0.3333
U	530	GO:0042180	cellular ketone metabolic process	0.0194	0.2917
U	531	GO:0072507	divalent inorganic cation homeostasis	0.0194	0.0833
U	532	GO:0071248	cellular response to metal ion	0.0194	0.0714
U	533	GO:0044446	intracellular organelle part	0.0193	264.4
U	534	GO:0034645	cellular macromolecule biosynthetic process	0.0193	15.7333
U	535	GO:0090199	regulation of release of cytochrome c from mitochondria	0.0193	0.3
U	536	GO:0044237	cellular metabolic process	0.0192	64.2667
U	537	GO:1901700	response to oxygen-containing compound	0.0192	14.8667
U	538	GO:0009719	response to endogenous stimulus	0.0192	9.4
U	539	GO:0033273	response to vitamin	0.0192	0.4667
U	540	GO:0016043	cellular component organization	0.0191	95.4333
U	541	GO:0006820	anion transport	0.0191	3.1667
U	542	GO:2001233	regulation of apoptotic signaling pathway	0.0191	2.2
U	543	GO:0044422	organelle part	0.019	259.833
U	544	GO:1901699	cellular response to nitrogen compound	0.019	2.7667
U	545	GO:0051052	regulation of DNA metabolic process	0.019	0.7333
U	546	GO:1900034	regulation of cellular response to heat	0.019	0.2308
U	547	GO:0043227	membrane-bounded organelle	0.0188	233.433
U	548	GO:0006793	phosphorus metabolic process	0.0188	28
U	549	GO:0051494	negative regulation of cytoskeleton organization	0.0188	0.3793
U	550	GO:0044782	cilium organization	0.0187	10.8667
U	551	GO:0044282	small molecule catabolic process	0.0187	0.5
U	552	GO:0044444	cytoplasmic part	0.0186	433.5
U	553	GO:0044763	single-organism cellular process	0.0186	125.867
U	554	GO:0009056	catabolic process	0.0186	8.8
U	555	GO:0031328	positive regulation of cellular biosynthetic process	0.0186	1.0667
U	556	GO:0010906	regulation of glucose metabolic process	0.0186	0.7667
U	557	GO:0030217	T cell differentiation	0.0186	0.5667
U	558	GO:0042594	response to starvation	0.0186	0.4815
U	559	GO:0051249	regulation of lymphocyte activation	0.0185	2.8667
U	560	GO:0009628	response to abiotic stimulus	0.0184	4.4333
U	561	GO:0008219	cell death	0.0184	3.2
U	562	GO:0010038	response to metal ion	0.0184	1.8667
U	563	GO:0043492	ATPase activity, coupled to movement of substances	0.0184	0.6
U	564	GO:0031982	vesicle	0.0183	132.667
U	565	GO:0034641	cellular nitrogen compound metabolic process	0.0183	24.9333
U	566	GO:0003676	nucleic acid binding	0.0183	21.7667
U	567	GO:0016570	histone modification	0.0183	3.3333
U	568	GO:0007568	aging	0.0183	0.7
U	569	GO:0030529	intracellular ribonucleoprotein complex	0.0181	14.4333
U	570	GO:0015291	secondary active transmembrane transporter activity	0.0181	0.8966
U	571	GO:0032970	regulation of actin filament-based process	0.0181	0.08
U	572	GO:0071495	cellular response to endogenous stimulus	0.018	6.1
U	573	GO:0051270	regulation of cellular component movement	0.018	1.9
U	574	GO:0050865	regulation of cell activation	0.0179	2.9667
U	575	GO:0010033	response to organic substance	0.0178	17.1667
U	576	GO:0070887	cellular response to chemical stimulus	0.0178	14.1333
U	577	GO:0030031	cell projection assembly	0.0178	12
U	578	GO:0071871	response to epinephrine	0.0178	0.1429
U	579	GO:0022607	cellular component assembly	0.0177	37.3333
U	580	GO:0031012	extracellular matrix	0.0177	12.7667
U	581	GO:1902582	single-organism intracellular transport	0.0177	2.2333
U	582	GO:0033013	tetrapyrrole metabolic process	0.0177	0.5
U	583	GO:0010524	positive regulation of calcium ion transport into cytosol	0.0177	0.1818
U	584	GO:0090257	regulation of muscle system process	0.0176	0.4231
U	585	GO:0005979	regulation of glycogen biosynthetic process	0.0176	0.12
U	586	GO:0060998	regulation of dendritic spine development	0.0175	0.2
U	587	GO:0044297	cell body	0.0175	0.0909
U	588	GO:0051234	establishment of localization	0.0173	40
U	589	GO:0044283	small molecule biosynthetic process	0.0173	6.8667
U	590	GO:0045830	positive regulation of isotype switching	0.0173	0.1724
U	591	GO:0002009	morphogenesis of an epithelium	0.0172	2.3
U	592	GO:0050821	protein stabilization	0.0172	0.2667
U	593	GO:0007044	cell-substrate junction assembly	0.0172	0.25
U	594	GO:0008152	metabolic process	0.0171	102.433
U	595	GO:0031667	response to nutrient levels	0.0171	2.2
U	596	GO:0032403	protein complex binding	0.0171	1.8667
U	597	GO:0071407	cellular response to organic cyclic compound	0.0171	1.3667
U	598	GO:0042110	T cell activation	0.0171	0.6429
U	599	GO:0043226	organelle	0.017	273
U	600	GO:0043229	intracellular organelle	0.017	206
U	601	GO:0009059	macromolecule biosynthetic process	0.017	15.9667
U	602	GO:1990904	ribonucleoprotein complex	0.017	12.6
U	603	GO:0032272	negative regulation of protein polymerization	0.017	0.12
U	604	GO:0034329	cell junction assembly	0.0169	0.6897
U	605	GO:0006366	transcription from RNA polymerase II promoter	0.0169	0.0833
U	606	GO:0040011	locomotion	0.0167	1.5
U	607	GO:0006112	energy reserve metabolic process	0.0167	0.0769
U	608	GO:0009408	response to heat	0.0167	0.0667
U	609	GO:0071869	response to catecholamine	0.0167	0.0556
U	610	GO:0072593	reactive oxygen species metabolic process	0.0167	0.0455
U	611	GO:0001822	kidney development	0.0167	0.037
U	612	GO:0006915	apoptotic process	0.0166	2.8333
U	613	GO:0014070	response to organic cyclic compound	0.0166	2.6
U	614	GO:0050848	regulation of calcium-mediated signaling	0.0166	0.2727
U	615	GO:0042221	response to chemical	0.0165	26.8667
U	616	GO:0009991	response to extracellular stimulus	0.0165	1.9
U	617	GO:0070201	regulation of establishment of protein localization	0.0165	0.9333
U	618	GO:1901505	carbohydrate derivative transporter activity	0.0165	0.1905
U	619	GO:0071840	cellular component organization or biogenesis	0.0164	97.3333
U	620	GO:1901363	heterocyclic compound binding	0.0164	31.5667
U	621	GO:0050773	regulation of dendrite development	0.0164	0.9
U	622	GO:0009165	nucleotide biosynthetic process	0.0164	0.6786
U	623	GO:0005342	organic acid transmembrane transporter activity	0.0164	0.2069
U	624	GO:0044877	macromolecular complex binding	0.0163	2.0667
U	625	GO:0010721	negative regulation of cell development	0.0163	0.3929
U	626	GO:0006796	phosphate-containing compound metabolic process	0.0162	18.2
U	627	GO:0010941	regulation of cell death	0.0162	6.5667
U	628	GO:0002791	regulation of peptide secretion	0.0162	1.4
U	629	GO:0042391	regulation of membrane potential	0.0162	0.44
U	630	GO:0030182	neuron differentiation	0.0162	0.2941
U	631	GO:0046365	monosaccharide catabolic process	0.0162	0.2593
U	632	GO:0043068	positive regulation of programmed cell death	0.016	1.4
U	633	GO:0006897	endocytosis	0.016	0.4
U	634	GO:0051179	localization	0.0159	34.8667
U	635	GO:0050817	coagulation	0.0159	0.3125
U	636	GO:0045911	positive regulation of DNA recombination	0.0159	0.2069
U	637	GO:0006810	transport	0.0157	35.0667
U	638	GO:0070925	organelle assembly	0.0157	10.6333
U	639	GO:0051046	regulation of secretion	0.0157	3.3333
U	640	GO:0023056	positive regulation of signaling	0.0157	2.9333
U	641	GO:0008509	anion transmembrane transporter activity	0.0157	1.8
U	642	GO:1903530	regulation of secretion by cell	0.0156	2.1667
U	643	GO:0010817	regulation of hormone levels	0.0156	2.0333
U	644	GO:0043065	positive regulation of apoptotic process	0.0156	1.7333
U	645	GO:0045785	positive regulation of cell adhesion	0.0156	1.3
U	646	GO:1902653	secondary alcohol biosynthetic process	0.0156	0.6667
U	647	GO:0016126	sterol biosynthetic process	0.0156	0.6333
U	648	GO:0016323	basolateral plasma membrane	0.0156	0.5333
U	649	GO:0032355	response to estradiol	0.0156	0.4286
U	650	GO:0001947	heart looping	0.0156	0.25
U	651	GO:0071704	organic substance metabolic process	0.0155	54.9667
U	652	GO:0042981	regulation of apoptotic process	0.0155	5.2667
U	653	GO:0019725	cellular homeostasis	0.0155	1.5
U	654	GO:0031968	organelle outer membrane	0.0155	0.9667
U	655	GO:0010769	regulation of cell morphogenesis involved in differentiation	0.0154	0.7333
U	656	GO:0002821	positive regulation of adaptive immune response	0.0154	0.1111
U	657	GO:0071310	cellular response to organic substance	0.0153	8.5667
U	658	GO:0008038	neuron recognition	0.0153	0.5333
U	659	GO:0010976	positive regulation of neuron projection development	0.0152	2.8
U	660	GO:0030001	metal ion transport	0.0152	0.8
U	661	GO:0045665	negative regulation of neuron differentiation	0.0152	0.4643
U	662	GO:0006029	proteoglycan metabolic process	0.0152	0.2273
U	663	GO:0003143	embryonic heart tube morphogenesis	0.0152	0.1667
U	664	GO:0044699	single-organism process	0.0151	131.767
U	665	GO:0033993	response to lipid	0.0151	3.1667
U	666	GO:0001076	transcription factor activity, RNA polymerase II transcription factor binding	0.0151	0.4545
U	667	GO:0097159	organic cyclic compound binding	0.015	30.0333
U	668	GO:0044707	single-multicellular organism process	0.015	12.5667
U	669	GO:0000785	chromatin	0.015	8.8667
U	670	GO:0052548	regulation of endopeptidase activity	0.015	0.8333
U	671	GO:0006695	cholesterol biosynthetic process	0.015	0.7
U	672	GO:0007029	endoplasmic reticulum organization	0.015	0.3333
U	673	GO:2000116	regulation of cysteine-type endopeptidase activity	0.0149	0.7667
U	674	GO:0001046	core promoter sequence-specific DNA binding	0.0148	0.3333
U	675	GO:2000272	negative regulation of receptor activity	0.0148	0.1667
U	676	GO:0001775	cell activation	0.0147	4.5
U	677	GO:0007613	memory	0.0147	0.6
U	678	GO:0051384	response to glucocorticoid	0.0147	0.1786
U	679	GO:0006725	cellular aromatic compound metabolic process	0.0145	17.1
U	680	GO:0032409	regulation of transporter activity	0.0145	0.8333
U	681	GO:0007585	respiratory gaseous exchange	0.0145	0.5333
U	682	GO:0070997	neuron death	0.0145	0.3448
U	683	GO:0044238	primary metabolic process	0.0144	41.9667
U	684	GO:0010647	positive regulation of cell communication	0.0144	2.3333
U	685	GO:0032589	neuron projection membrane	0.0144	0.0741
U	686	GO:0016020	membrane	0.0143	64.5667
U	687	GO:0009605	response to external stimulus	0.0143	3.5333
U	688	GO:1902580	single-organism cellular localization	0.0143	1.9
U	689	GO:0048878	chemical homeostasis	0.0143	1.6333
U	690	GO:0050714	positive regulation of protein secretion	0.0143	1.1481
U	691	GO:0044802	single-organism membrane organization	0.0143	0.9
U	692	GO:0051050	positive regulation of transport	0.0142	4.3
U	693	GO:0016569	covalent chromatin modification	0.0141	7.9
U	694	GO:0043204	perikaryon	0.0141	1
U	695	GO:0022834	ligand-gated channel activity	0.0141	0.6
U	696	GO:0002889	regulation of immunoglobulin mediated immune response	0.0141	0.1852
U	697	GO:0046835	carbohydrate phosphorylation	0.0141	0.1667
U	698	GO:0002682	regulation of immune system process	0.014	5.3333
U	699	GO:0031344	regulation of cell projection organization	0.014	2.9
U	700	GO:0016324	apical plasma membrane	0.014	1.2414
U	701	GO:0015297	antiporter activity	0.014	0.3571
U	702	GO:0016684	oxidoreductase activity, acting on peroxide as acceptor	0.014	0.3333
U	703	GO:0044428	nuclear part	0.0139	25.8667
U	704	GO:0007050	cell cycle arrest	0.0139	3.7667
U	705	GO:0010975	regulation of neuron projection development	0.0139	3.5667
U	706	GO:0009792	embryo development ending in birth or egg hatching	0.0139	0.2414
U	707	GO:0001105	RNA polymerase II transcription coactivator activity	0.0139	0.1852
U	708	GO:0032886	regulation of microtubule-based process	0.0138	0.5556
U	709	GO:0048839	inner ear development	0.0138	0.2069
U	710	GO:0030414	peptidase inhibitor activity	0.0138	0.1905
U	711	GO:0046483	heterocycle metabolic process	0.0137	15.2
U	712	GO:0090263	positive regulation of canonical Wnt signaling pathway	0.0137	0.1053
U	713	GO:0044425	membrane part	0.0136	132.233
U	714	GO:0007166	cell surface receptor signaling pathway	0.0136	7.2333
U	715	GO:0019900	kinase binding	0.0136	1.9667
U	716	GO:0005741	mitochondrial outer membrane	0.0136	0.9333
U	717	GO:0001666	response to hypoxia	0.0136	0.9
U	718	GO:0006139	nucleobase-containing compound metabolic process	0.0135	14.6667
U	719	GO:0051174	regulation of phosphorus metabolic process	0.0135	2.6667
U	720	GO:0090407	organophosphate biosynthetic process	0.0135	1.8
U	721	GO:0048584	positive regulation of response to stimulus	0.0134	7.6333
U	722	GO:0016310	phosphorylation	0.0134	6.3
U	723	GO:0034097	response to cytokine	0.0133	0.6552
U	724	GO:0061448	connective tissue development	0.0133	0.2963
U	725	GO:0005654	nucleoplasm	0.0132	22.9333
U	726	GO:0005578	proteinaceous extracellular matrix	0.0132	5.8333
U	727	GO:0009887	animal organ morphogenesis	0.0132	4.4333
U	728	GO:0003700	transcription factor activity, sequence-specific DNA binding	0.0132	1.6667
U	729	GO:0032412	regulation of ion transmembrane transporter activity	0.0132	0.6207
U	730	GO:0031333	negative regulation of protein complex assembly	0.0132	0.2
U	731	GO:0030855	epithelial cell differentiation	0.0131	1.9
U	732	GO:0048729	tissue morphogenesis	0.0131	1.6333
U	733	GO:0009987	cellular process	0.013	86.4
U	734	GO:0050896	response to stimulus	0.013	40.5333
U	735	GO:0031346	positive regulation of cell projection organization	0.013	2.8
U	736	GO:0044267	cellular protein metabolic process	0.0129	22.0667
U	737	GO:0009725	response to hormone	0.0129	1.6
U	738	GO:0043069	negative regulation of programmed cell death	0.0129	1.4333
U	739	GO:1902652	secondary alcohol metabolic process	0.0129	0.8
U	740	GO:0019903	protein phosphatase binding	0.0129	0.4667
U	741	GO:0001948	glycoprotein binding	0.0129	0.1724
U	742	GO:0002684	positive regulation of immune system process	0.0128	2.1667
U	743	GO:0030155	regulation of cell adhesion	0.0128	2.0667
U	744	GO:0001071	nucleic acid binding transcription factor activity	0.0128	1.5333
U	745	GO:0033267	axon part	0.0128	0.7143
U	746	GO:0003824	catalytic activity	0.0127	70.6333
U	747	GO:0043067	regulation of programmed cell death	0.0127	3.8667
U	748	GO:0002521	leukocyte differentiation	0.0127	1.9667
U	749	GO:0008203	cholesterol metabolic process	0.0127	0.8
U	750	GO:1901360	organic cyclic compound metabolic process	0.0126	15.8333
U	751	GO:0040012	regulation of locomotion	0.0126	0.9
U	752	GO:0010821	regulation of mitochondrion organization	0.0126	0.8667
U	753	GO:1903018	regulation of glycoprotein metabolic process	0.0126	0.3333
U	754	GO:0031072	heat shock protein binding	0.0126	0.1538
U	755	GO:0051716	cellular response to stimulus	0.0125	15.4
U	756	GO:0036094	small molecule binding	0.0125	7.5
U	757	GO:0002694	regulation of leukocyte activation	0.0124	1.9
U	758	GO:0016874	ligase activity	0.0124	0.5667
U	759	GO:2001235	positive regulation of apoptotic signaling pathway	0.0124	0.4
U	760	GO:0008565	protein transporter activity	0.0124	0.1667
U	761	GO:0005576	extracellular region	0.0123	17.1333
U	762	GO:0032879	regulation of localization	0.0123	11.3667
U	763	GO:0036498	IRE1-mediated unfolded protein response	0.0123	0.9
U	764	GO:0048468	cell development	0.0122	1.8
U	765	GO:0060993	kidney morphogenesis	0.0122	0.0833
U	766	GO:0009889	regulation of biosynthetic process	0.0121	7.8667
U	767	GO:0015631	tubulin binding	0.0121	3.3
U	768	GO:0046777	protein autophosphorylation	0.0121	1.6333
U	769	GO:0009790	embryo development	0.0121	0.3214
U	770	GO:0005815	microtubule organizing center	0.012	12.1333
U	771	GO:0034765	regulation of ion transmembrane transport	0.012	1.0741
U	772	GO:0043130	ubiquitin binding	0.012	1.0333
U	773	GO:0046165	alcohol biosynthetic process	0.012	0.7333
U	774	GO:1904064	positive regulation of cation transmembrane transport	0.012	0.3333
U	775	GO:1902589	single-organism organelle organization	0.0119	10.5667
U	776	GO:0032501	multicellular organismal process	0.0119	9.8667
U	777	GO:0043066	negative regulation of apoptotic process	0.0119	0.9333
U	778	GO:0010639	negative regulation of organelle organization	0.0119	0.7143
U	779	GO:0097305	response to alcohol	0.0119	0.6667
U	780	GO:0043177	organic acid binding	0.0119	0.4
U	781	GO:0050794	regulation of cellular process	0.0118	46.4
U	782	GO:0022603	regulation of anatomical structure morphogenesis	0.0118	0.7
U	783	GO:0006898	receptor-mediated endocytosis	0.0118	0.3
U	784	GO:0010720	positive regulation of cell development	0.0117	2.7333
U	785	GO:0043270	positive regulation of ion transport	0.0117	0.9333
U	786	GO:1903828	negative regulation of cellular protein localization	0.0117	0.2857
U	787	GO:0031304	intrinsic component of mitochondrial inner membrane	0.0117	0.1923
U	788	GO:0002699	positive regulation of immune effector process	0.0117	0.1364
U	789	GO:0044767	single-organism developmental process	0.0116	39.8333
U	790	GO:0044093	positive regulation of molecular function	0.0116	2.9
U	791	GO:0016301	kinase activity	0.0116	2.6333
U	792	GO:0008284	positive regulation of cell proliferation	0.0116	1.2333
U	793	GO:0000988	transcription factor activity, protein binding	0.0116	0.8333
U	794	GO:0051129	negative regulation of cellular component organization	0.0116	0.6
U	795	total	NA	0.0115	510.233
U	796	GO:0030030	cell projection organization	0.0115	7.0333
U	797	GO:0003712	transcription cofactor activity	0.0115	0.8333
U	798	GO:0022803	passive transmembrane transporter activity	0.0115	0.1667
U	799	GO:0002253	activation of immune response	0.0115	0.1071
U	800	GO:0065007	biological regulation	0.0114	79.7333
U	801	GO:0043170	macromolecule metabolic process	0.0114	43.6333
U	802	GO:0031323	regulation of cellular metabolic process	0.0114	14.3
U	803	GO:1901362	organic cyclic compound biosynthetic process	0.0114	7.9333
U	804	GO:0045935	positive regulation of nucleobase-containing compound metabolic process	0.0114	1.1
U	805	GO:0040013	negative regulation of locomotion	0.0114	0.3333
U	806	GO:0035091	phosphatidylinositol binding	0.0114	0.2414
U	807	GO:0048856	anatomical structure development	0.0113	40.7333
U	808	GO:0043169	cation binding	0.0113	28.6
U	809	GO:0044432	endoplasmic reticulum part	0.0113	15.1
U	810	GO:1901575	organic substance catabolic process	0.0113	2.4
U	811	GO:0061024	membrane organization	0.0113	1
U	812	GO:0051223	regulation of protein transport	0.0113	0.7778
U	813	GO:0001228	transcriptional activator activity, RNA polymerase II transcription regulatory region sequence-specific binding	0.0113	0.1667
U	814	GO:0019538	protein metabolic process	0.0112	25.4333
U	815	GO:0048522	positive regulation of cellular process	0.0112	15.6333
U	816	GO:0019899	enzyme binding	0.0112	4.2333
U	817	GO:0042327	positive regulation of phosphorylation	0.0112	0.4643
U	818	GO:0032387	negative regulation of intracellular transport	0.0112	0.1739
U	819	GO:0005524	ATP binding	0.0111	5.8
U	820	GO:0050678	regulation of epithelial cell proliferation	0.0111	0.8667
U	821	GO:0051961	negative regulation of nervous system development	0.0111	0.4074
U	822	GO:0007163	establishment or maintenance of cell polarity	0.0111	0.3929
U	823	GO:0002931	response to ischemia	0.0111	0.2
U	824	GO:0031214	biomineral tissue development	0.0111	0.125
U	825	GO:0043279	response to alkaloid	0.0111	0.1111
U	826	GO:0033218	amide binding	0.0111	0.0909
U	827	GO:0030814	regulation of cAMP metabolic process	0.0111	0.0909
U	828	GO:0001558	regulation of cell growth	0.0111	0.0909
U	829	GO:0051606	detection of stimulus	0.0111	0.0625
U	830	GO:0006260	DNA replication	0.0111	0.0588
U	831	GO:2000758	positive regulation of peptidyl-lysine acetylation	0.0111	0.0556
U	832	GO:0005977	glycogen metabolic process	0.0111	0.0526
U	833	GO:0048306	calcium-dependent protein binding	0.0111	0.0476
U	834	GO:0005925	focal adhesion	0.0111	0.0417
U	835	GO:0050789	regulation of biological process	0.011	55.2
U	836	GO:0046872	metal ion binding	0.011	32.6333
U	837	GO:0006950	response to stress	0.011	20.6333
U	838	GO:0012501	programmed cell death	0.011	2.3333
U	839	GO:0060548	negative regulation of cell death	0.011	1.7333
U	840	GO:0033674	positive regulation of kinase activity	0.011	0.7
U	841	GO:0097435	supramolecular fiber organization	0.011	0.5667
U	842	GO:0042645	mitochondrial nucleoid	0.011	0.2857
U	843	GO:0009653	anatomical structure morphogenesis	0.0109	13.9667
U	844	GO:0016746	transferase activity, transferring acyl groups	0.0109	3.6333
U	845	GO:0045666	positive regulation of neuron differentiation	0.0109	1.8667
U	846	GO:0016407	acetyltransferase activity	0.0109	0.1905
U	847	GO:0007417	central nervous system development	0.0109	0.1786
U	848	GO:0042592	homeostatic process	0.0108	2.7333
U	849	GO:0008092	cytoskeletal protein binding	0.0108	2.1667
U	850	GO:0034332	adherens junction organization	0.0108	0.7333
U	851	GO:0051098	regulation of binding	0.0108	0.5714
U	852	GO:0065008	regulation of biological quality	0.0107	10.8
U	853	GO:0051649	establishment of localization in cell	0.0107	2.2
U	854	GO:0031984	organelle subcompartment	0.0107	1.9
U	855	GO:0009967	positive regulation of signal transduction	0.0107	1.6
U	856	GO:0030098	lymphocyte differentiation	0.0107	1.1333
U	857	GO:0032880	regulation of protein localization	0.0107	1.0333
U	858	GO:0060589	nucleoside-triphosphatase regulator activity	0.0107	0.8
U	859	GO:0042129	regulation of T cell proliferation	0.0107	0.1111
U	860	GO:0044260	cellular macromolecule metabolic process	0.0106	33.8333
U	861	GO:0007165	signal transduction	0.0106	22.0667
U	862	GO:0019222	regulation of metabolic process	0.0106	14.9333
U	863	GO:0048583	regulation of response to stimulus	0.0106	12.0333
U	864	GO:0005615	extracellular space	0.0106	5.2333
U	865	GO:0023051	regulation of signaling	0.0106	5.2
U	866	GO:0071396	cellular response to lipid	0.0106	0.5556
U	867	GO:0048518	positive regulation of biological process	0.0105	16.9
U	868	GO:1901265	nucleoside phosphate binding	0.0105	6.5667
U	869	GO:0051094	positive regulation of developmental process	0.0105	3.4
U	870	GO:0007049	cell cycle	0.0105	0.2857
U	871	GO:0031224	intrinsic component of membrane	0.0104	85.7
U	872	GO:0008285	negative regulation of cell proliferation	0.0104	5.1667
U	873	GO:0003714	transcription corepressor activity	0.0104	0.6667
U	874	GO:0002637	regulation of immunoglobulin production	0.0104	0.1429
U	875	GO:0044424	intracellular part	0.0103	103.433
U	876	GO:0016021	integral component of membrane	0.0103	86.3333
U	877	GO:0018130	heterocycle biosynthetic process	0.0103	6.4333
U	878	GO:0090150	establishment of protein localization to membrane	0.0103	1.3
U	879	GO:0032182	ubiquitin-like protein binding	0.0103	0.9
U	880	GO:0006936	muscle contraction	0.0103	0.6207
U	881	GO:0005488	binding	0.0102	123.8
U	882	GO:0051239	regulation of multicellular organismal process	0.0102	9.0333
U	883	GO:0000166	nucleotide binding	0.0102	8.2667
U	884	GO:0008237	metallopeptidase activity	0.0102	2.7667
U	885	GO:0004222	metalloendopeptidase activity	0.0102	2.2667
U	886	GO:0048870	cell motility	0.0102	1.3
U	887	GO:0004674	protein serine/threonine kinase activity	0.0102	0.9333
U	888	GO:0050850	positive regulation of calcium-mediated signaling	0.0102	0.1364
U	889	GO:0010880	regulation of release of sequestered calcium ion into cytosol by sarcoplasmic reticulum	0.0102	0.125
U	890	GO:1901983	regulation of protein acetylation	0.0102	0.1053
U	891	GO:0032502	developmental process	0.0101	43.4
U	892	GO:0043167	ion binding	0.0101	31.8667
U	893	GO:0080090	regulation of primary metabolic process	0.0101	11.8
U	894	GO:0009891	positive regulation of biosynthetic process	0.0101	0.8333
U	895	GO:0072395	signal transduction involved in cell cycle checkpoint	0.0101	0.24
U	896	GO:0071300	cellular response to retinoic acid	0.0101	0.0833
U	897	GO:0048513	animal organ development	0.01	7.5
U	898	GO:0045664	regulation of neuron differentiation	0.01	2.3667
U	899	GO:0032844	regulation of homeostatic process	0.01	0.9643
U	900	GO:0031625	ubiquitin protein ligase binding	0.01	0.5357
U	901	GO:0016791	phosphatase activity	0.01	0.5333
U	902	GO:0051049	regulation of transport	0.0099	5.4333
U	903	GO:0098590	plasma membrane region	0.0099	2.0667
U	904	GO:0046907	intracellular transport	0.0099	1.9667
U	905	GO:0016477	cell migration	0.0099	1.7333
U	906	GO:0051646	mitochondrion localization	0.0099	0.1786
U	907	GO:0022843	voltage-gated cation channel activity	0.0099	0.16
U	908	GO:0006996	organelle organization	0.0098	10.2
U	909	GO:0002376	immune system process	0.0098	10.0333
U	910	GO:0031326	regulation of cellular biosynthetic process	0.0098	7.9667
U	911	GO:0006325	chromatin organization	0.0098	6.0667
U	912	GO:0030554	adenyl nucleotide binding	0.0098	5.3667
U	913	GO:0051252	regulation of RNA metabolic process	0.0098	4.7
U	914	GO:0097458	neuron part	0.0098	4.2667
U	915	GO:0043005	neuron projection	0.0098	3.2667
U	916	GO:0050769	positive regulation of neurogenesis	0.0098	1.9667
U	917	GO:0006457	protein folding	0.0098	0.7667
U	918	GO:0046873	metal ion transmembrane transporter activity	0.0098	0.5667
U	919	GO:0010822	positive regulation of mitochondrion organization	0.0098	0.3333
U	920	GO:0032990	cell part morphogenesis	0.0098	0.08
U	921	GO:0034654	nucleobase-containing compound biosynthetic process	0.0097	6.0333
U	922	GO:0045595	regulation of cell differentiation	0.0097	2.5333
U	923	GO:0040007	growth	0.0097	1.1667
U	924	GO:0043549	regulation of kinase activity	0.0097	0.9667
U	925	GO:0070482	response to oxygen levels	0.0097	0.8333
U	926	GO:0030334	regulation of cell migration	0.0097	0.7667
U	927	GO:0010959	regulation of metal ion transport	0.0097	0.75
U	928	GO:0001503	ossification	0.0097	0.1538
U	929	GO:0045321	leukocyte activation	0.0096	2.7333
U	930	GO:0060284	regulation of cell development	0.0096	2.2333
U	931	GO:0051054	positive regulation of DNA metabolic process	0.0096	1.2333
U	932	GO:0051282	regulation of sequestering of calcium ion	0.0096	0.45
U	933	GO:0051962	positive regulation of nervous system development	0.0095	1.6667
U	934	GO:0051336	regulation of hydrolase activity	0.0095	1.2333
U	935	GO:0050767	regulation of neurogenesis	0.0095	1.1333
U	936	GO:0005829	cytosol	0.0094	26.3
U	937	GO:0043168	anion binding	0.0094	7.6
U	938	GO:0051253	negative regulation of RNA metabolic process	0.0094	4.6667
U	939	GO:0030968	endoplasmic reticulum unfolded protein response	0.0094	0.7333
U	940	GO:2001056	positive regulation of cysteine-type endopeptidase activity	0.0094	0.3667
U	941	GO:0016054	organic acid catabolic process	0.0094	0.2308
U	942	GO:0070665	positive regulation of leukocyte proliferation	0.0094	0.15
U	943	GO:0045980	negative regulation of nucleotide metabolic process	0.0094	0.1429
U	944	GO:0044275	cellular carbohydrate catabolic process	0.0094	0.1176
U	945	GO:0005515	protein binding	0.0093	108.3
U	946	GO:0005634	nucleus	0.0093	16.5
U	947	GO:0044427	chromosomal part	0.0093	7.8667
U	948	GO:0097367	carbohydrate derivative binding	0.0093	6.5667
U	949	GO:2000026	regulation of multicellular organismal development	0.0093	5.1333
U	950	GO:0006468	protein phosphorylation	0.0093	4.4
U	951	GO:0044057	regulation of system process	0.0093	0.5
U	952	GO:0097193	intrinsic apoptotic signaling pathway	0.0093	0.2
U	953	GO:0019200	carbohydrate kinase activity	0.0093	0.087
U	954	GO:0048869	cellular developmental process	0.0092	7.7667
U	955	GO:0055082	cellular chemical homeostasis	0.0092	0.8214
U	956	GO:0070848	response to growth factor	0.0092	0.5333
U	957	GO:0009986	cell surface	0.0092	0.5333
U	958	GO:0035148	tube formation	0.0092	0.2414
U	959	GO:0046326	positive regulation of glucose import	0.0092	0.1
U	960	GO:0035019	somatic stem cell population maintenance	0.0092	0.1
U	961	GO:0044430	cytoskeletal part	0.0091	8.8667
U	962	GO:0016192	vesicle-mediated transport	0.0091	3.0667
U	963	GO:0019901	protein kinase binding	0.0091	0.9333
U	964	GO:0010675	regulation of cellular carbohydrate metabolic process	0.0091	0.6897
U	965	GO:0034764	positive regulation of transmembrane transport	0.0091	0.2667
U	966	GO:0048545	response to steroid hormone	0.0091	0.25
U	967	GO:0043470	regulation of carbohydrate catabolic process	0.0091	0.1905
U	968	GO:0010770	positive regulation of cell morphogenesis involved in differentiation	0.0091	0.1304
U	969	GO:0048519	negative regulation of biological process	0.009	20.5333
U	970	GO:0098805	whole membrane	0.009	10.4333
U	971	GO:0019219	regulation of nucleobase-containing compound metabolic process	0.009	6.1
U	972	GO:0051171	regulation of nitrogen compound metabolic process	0.009	5.2
U	973	GO:0009893	positive regulation of metabolic process	0.009	4.6667
U	974	GO:0022610	biological adhesion	0.009	4.5
U	975	GO:0072657	protein localization to membrane	0.009	1.4667
U	976	GO:0000989	transcription factor activity, transcription factor binding	0.009	0.8667
U	977	GO:0032870	cellular response to hormone stimulus	0.009	0.5667
U	978	GO:0098589	membrane region	0.009	0.3103
U	979	GO:0000086	G2/M transition of mitotic cell cycle	0.009	0.2
U	980	GO:1903506	regulation of nucleic acid-templated transcription	0.0089	4.1
U	981	GO:0045859	regulation of protein kinase activity	0.0089	1.4
U	982	GO:0032944	regulation of mononuclear cell proliferation	0.0089	0.2143
U	983	GO:0009266	response to temperature stimulus	0.0089	0.1667
U	984	GO:0048523	negative regulation of cellular process	0.0088	18.5
U	985	GO:0010646	regulation of cell communication	0.0088	5.3333
U	986	GO:0032559	adenyl ribonucleotide binding	0.0088	4.3333
U	987	GO:1903507	negative regulation of nucleic acid-templated transcription	0.0088	4.0333
U	988	GO:0051172	negative regulation of nitrogen compound metabolic process	0.0088	3.6333
U	989	GO:0044248	cellular catabolic process	0.0088	2.1333
U	990	GO:0006979	response to oxidative stress	0.0088	1.2
U	991	GO:0003013	circulatory system process	0.0088	0.6
U	992	GO:0090559	regulation of membrane permeability	0.0088	0.15
U	993	GO:0098588	bounding membrane of organelle	0.0087	12.4667
U	994	GO:0045892	negative regulation of transcription, DNA-templated	0.0087	4.0333
U	995	GO:0071702	organic substance transport	0.0087	3.7333
U	996	GO:0009890	negative regulation of biosynthetic process	0.0087	3
U	997	GO:0016772	transferase activity, transferring phosphorus-containing groups	0.0087	1.7667
U	998	GO:0048589	developmental growth	0.0087	0.7667
U	999	GO:2001234	negative regulation of apoptotic signaling pathway	0.0087	0.3
U	1000	GO:1904950	negative regulation of establishment of protein localization	0.0087	0.2069
U	1001	GO:0072175	epithelial tube formation	0.0087	0.1538
U	1002	GO:0060348	bone development	0.0087	0.1429
U	1003	GO:0009611	response to wounding	0.0087	0.1333
U	1004	GO:0060255	regulation of macromolecule metabolic process	0.0086	10.7333
U	1005	GO:0050793	regulation of developmental process	0.0086	6.2667
U	1006	GO:0032553	ribonucleotide binding	0.0086	5.1333
U	1007	GO:0023057	negative regulation of signaling	0.0086	2.9
U	1008	GO:0042995	cell projection	0.0086	2.8333
U	1009	GO:0051247	positive regulation of protein metabolic process	0.0086	1.5333
U	1010	GO:0060341	regulation of cellular localization	0.0086	1.4
U	1011	GO:0044702	single organism reproductive process	0.0086	1.2333
U	1012	GO:0034762	regulation of transmembrane transport	0.0086	0.8333
U	1013	GO:1902680	positive regulation of RNA biosynthetic process	0.0086	0.6786
U	1014	GO:0044839	cell cycle G2/M phase transition	0.0086	0.4333
U	1015	GO:0006458	'de novo' protein folding	0.0086	0.0833
U	1016	GO:0050877	neurological system process	0.0085	1.2
U	1017	GO:0009612	response to mechanical stimulus	0.0085	0.5357
U	1018	GO:2000677	regulation of transcription regulatory region DNA binding	0.0085	0.0952
U	1019	GO:0005509	calcium ion binding	0.0084	5.2333
U	1020	GO:0043085	positive regulation of catalytic activity	0.0084	2.0333
U	1021	GO:0019902	phosphatase binding	0.0084	0.6552
U	1022	GO:0016525	negative regulation of angiogenesis	0.0084	0.1111
U	1023	GO:0031325	positive regulation of cellular metabolic process	0.0083	4.3667
U	1024	GO:0006355	regulation of transcription, DNA-templated	0.0083	4.0333
U	1025	GO:0048585	negative regulation of response to stimulus	0.0083	2.7333
U	1026	GO:0032101	regulation of response to external stimulus	0.0083	0.3667
U	1027	GO:0050851	antigen receptor-mediated signaling pathway	0.0083	0.2
U	1028	GO:2001259	positive regulation of cation channel activity	0.0083	0.0667
U	1029	GO:0051091	positive regulation of sequence-specific DNA binding transcription factor activity	0.0083	0.0667
U	1030	GO:0016668	oxidoreductase activity, acting on a sulfur group of donors, NAD(P) as acceptor	0.0083	0.0625
U	1031	GO:0009100	glycoprotein metabolic process	0.0083	0.0556
U	1032	GO:1901985	positive regulation of protein acetylation	0.0083	0.0476
U	1033	GO:0002819	regulation of adaptive immune response	0.0083	0.0476
U	1034	GO:0043228	non-membrane-bounded organelle	0.0082	13.4333
U	1035	GO:0010468	regulation of gene expression	0.0082	6.6667
U	1036	GO:0010556	regulation of macromolecule biosynthetic process	0.0082	5.1667
U	1037	GO:0031324	negative regulation of cellular metabolic process	0.0082	4.4
U	1038	GO:0003008	system process	0.0082	4.4
U	1039	GO:0019867	outer membrane	0.0082	0.5667
U	1040	GO:0051222	positive regulation of protein transport	0.0082	0.3704
U	1041	GO:0098869	cellular oxidant detoxification	0.0082	0.2667
U	1042	GO:0098771	inorganic ion homeostasis	0.0082	0.12
U	1043	GO:0051346	negative regulation of hydrolase activity	0.0082	0.0952
U	1044	GO:1902679	negative regulation of RNA biosynthetic process	0.0081	3.9333
U	1045	GO:2000113	negative regulation of cellular macromolecule biosynthetic process	0.0081	3.4
U	1046	GO:0000165	MAPK cascade	0.0081	0.4667
U	1047	GO:0015267	channel activity	0.0081	0.3571
U	1048	GO:0031647	regulation of protein stability	0.0081	0.2857
U	1049	GO:0097581	lamellipodium organization	0.0081	0.1481
U	1050	GO:0003674	molecular_function	0.008	116.133
U	1051	GO:0043232	intracellular non-membrane-bounded organelle	0.008	14
U	1052	GO:0045934	negative regulation of nucleobase-containing compound metabolic process	0.008	4.0667
U	1053	GO:0010604	positive regulation of macromolecule metabolic process	0.008	3.4333
U	1054	GO:0031327	negative regulation of cellular biosynthetic process	0.008	3.0333
U	1055	GO:1902531	regulation of intracellular signal transduction	0.008	1.9
U	1056	GO:0032270	positive regulation of cellular protein metabolic process	0.008	1.7667
U	1057	GO:0072594	establishment of protein localization to organelle	0.008	0.6207
U	1058	GO:0019932	second-messenger-mediated signaling	0.008	0.2857
U	1059	GO:0022836	gated channel activity	0.008	0.2333
U	1060	GO:0055080	cation homeostasis	0.008	0.2
U	1061	GO:0019438	aromatic compound biosynthetic process	0.0079	5.0667
U	1062	GO:0007155	cell adhesion	0.0079	4.2333
U	1063	GO:0042802	identical protein binding	0.0079	1.9
U	1064	GO:0000976	transcription regulatory region sequence-specific DNA binding	0.0079	0.9
U	1065	GO:0051301	cell division	0.0079	0.8667
U	1066	GO:1902533	positive regulation of intracellular signal transduction	0.0079	0.4444
U	1067	GO:0005267	potassium channel activity	0.0079	0.125
U	1068	GO:0043412	macromolecule modification	0.0078	15.5667
U	1069	GO:0017076	purine nucleotide binding	0.0078	5.5
U	1070	GO:0051641	cellular localization	0.0078	3.7333
U	1071	GO:0030054	cell junction	0.0078	1.8667
U	1072	GO:0008037	cell recognition	0.0078	1.7
U	1073	GO:0018193	peptidyl-amino acid modification	0.0078	0.3333
U	1074	GO:0010638	positive regulation of organelle organization	0.0078	0.3333
U	1075	GO:0051271	negative regulation of cellular component movement	0.0078	0.32
U	1076	GO:0098811	transcriptional repressor activity, RNA polymerase II activating transcription factor binding	0.0078	0.16
U	1077	GO:0005178	integrin binding	0.0078	0.0833
U	1078	GO:0016740	transferase activity	0.0077	15
U	1079	GO:0032555	purine ribonucleotide binding	0.0077	5.0667
U	1080	GO:0044463	cell projection part	0.0077	4.5333
U	1081	GO:0009968	negative regulation of signal transduction	0.0077	3.1
U	1082	GO:0051093	negative regulation of developmental process	0.0077	1.6333
U	1083	GO:0051248	negative regulation of protein metabolic process	0.0077	0.7586
U	1084	GO:0016788	hydrolase activity, acting on ester bonds	0.0077	0.7333
U	1085	GO:0042542	response to hydrogen peroxide	0.0077	0.1071
U	1086	GO:0036211	protein modification process	0.0076	11.0667
U	1087	GO:0030154	cell differentiation	0.0076	5.3333
U	1088	GO:2000112	regulation of cellular macromolecule biosynthetic process	0.0076	5.1
U	1089	GO:0033036	macromolecule localization	0.0076	4.5
U	1090	GO:0051128	regulation of cellular component organization	0.0076	3.8333
U	1091	GO:0051240	positive regulation of multicellular organismal process	0.0076	2.5667
U	1092	GO:0012506	vesicle membrane	0.0076	2.3667
U	1093	GO:0006928	movement of cell or subcellular component	0.0076	1.3
U	1094	GO:0010563	negative regulation of phosphorus metabolic process	0.0076	1.1333
U	1095	GO:0048471	perinuclear region of cytoplasm	0.0076	0.5333
U	1096	GO:1903508	positive regulation of nucleic acid-templated transcription	0.0076	0.3448
U	1097	GO:0010559	regulation of glycoprotein biosynthetic process	0.0076	0.2333
U	1098	GO:0050768	negative regulation of neurogenesis	0.0076	0.2143
U	1099	GO:0008076	voltage-gated potassium channel complex	0.0076	0.1852
U	1100	GO:0046395	carboxylic acid catabolic process	0.0076	0.1818
U	1101	GO:0045184	establishment of protein localization	0.0075	3.9
U	1102	GO:0097659	nucleic acid-templated transcription	0.0075	3.4667
U	1103	GO:0030424	axon	0.0075	1.0333
U	1104	GO:0042326	negative regulation of phosphorylation	0.0075	0.9
U	1105	GO:1901615	organic hydroxy compound metabolic process	0.0075	0.8667
U	1106	GO:0051051	negative regulation of transport	0.0075	0.24
U	1107	GO:0033673	negative regulation of kinase activity	0.0075	0.2069
U	1108	GO:0034774	secretory granule lumen	0.0075	0.1154
U	1109	GO:0044464	cell part	0.0074	79.4
U	1110	GO:0035556	intracellular signal transduction	0.0074	5.1333
U	1111	GO:0009892	negative regulation of metabolic process	0.0074	4.4667
U	1112	GO:0010629	negative regulation of gene expression	0.0074	3.6333
U	1113	GO:0044445	cytosolic part	0.0074	0.7333
U	1114	GO:0015711	organic anion transport	0.0074	0.5333
U	1115	GO:0010952	positive regulation of peptidase activity	0.0074	0.2667
U	1116	GO:0061135	endopeptidase regulator activity	0.0074	0.1111
U	1117	GO:0090280	positive regulation of calcium ion import	0.0074	0.1
U	1118	GO:0051246	regulation of protein metabolic process	0.0073	5.8667
U	1119	GO:0035639	purine ribonucleoside triphosphate binding	0.0073	4.8667
U	1120	GO:0010558	negative regulation of macromolecule biosynthetic process	0.0073	3.2333
U	1121	GO:0003682	chromatin binding	0.0073	2.1333
U	1122	GO:0045597	positive regulation of cell differentiation	0.0073	1.0667
U	1123	GO:0044212	transcription regulatory region DNA binding	0.0073	0.8667
U	1124	GO:1904951	positive regulation of establishment of protein localization	0.0073	0.6522
U	1125	GO:0045860	positive regulation of protein kinase activity	0.0073	0.5667
U	1126	GO:0007369	gastrulation	0.0073	0.2333
U	1127	GO:0097194	execution phase of apoptosis	0.0073	0.1071
U	1128	GO:0070302	regulation of stress-activated protein kinase signaling cascade	0.0073	0.0952
U	1129	GO:0046914	transition metal ion binding	0.0072	10.3
U	1130	GO:0006464	cellular protein modification process	0.0072	10.3
U	1131	GO:0051338	regulation of transferase activity	0.0072	3.2333
U	1132	GO:0051960	regulation of nervous system development	0.0072	1.6
U	1133	GO:0045202	synapse	0.0072	1.1667
U	1134	GO:0043565	sequence-specific DNA binding	0.0072	0.9
U	1135	GO:0010557	positive regulation of macromolecule biosynthetic process	0.0072	0.8
U	1136	GO:0006066	alcohol metabolic process	0.0072	0.5333
U	1137	GO:0048646	anatomical structure formation involved in morphogenesis	0.0072	0.4667
U	1138	GO:0042623	ATPase activity, coupled	0.0072	0.3333
U	1139	GO:0051924	regulation of calcium ion transport	0.0072	0.3103
U	1140	GO:0005783	endoplasmic reticulum	0.0071	4.7333
U	1141	GO:0032268	regulation of cellular protein metabolic process	0.0071	3.9667
U	1142	GO:0009966	regulation of signal transduction	0.0071	3.7667
U	1143	GO:0000122	negative regulation of transcription from RNA polymerase II promoter	0.0071	3.1
U	1144	GO:0006351	transcription, DNA-templated	0.0071	2.9667
U	1145	GO:0010648	negative regulation of cell communication	0.0071	2.6
U	1146	GO:0031225	anchored component of membrane	0.0071	1.1333
U	1147	GO:0052547	regulation of peptidase activity	0.0071	0.6071
U	1148	GO:0016125	sterol metabolic process	0.0071	0.4667
U	1149	GO:1903047	mitotic cell cycle process	0.0071	0.4333
U	1150	GO:2001141	regulation of RNA biosynthetic process	0.007	3.7333
U	1151	GO:0004175	endopeptidase activity	0.007	1.5667
U	1152	GO:0009888	tissue development	0.007	0.8333
U	1153	GO:0044770	cell cycle phase transition	0.007	0.3103
U	1154	GO:0031970	organelle envelope lumen	0.007	0.2069
U	1155	GO:0048609	multicellular organismal reproductive process	0.007	0.2
U	1156	GO:0008270	zinc ion binding	0.0069	7.8667
U	1157	GO:0090317	negative regulation of intracellular protein transport	0.0069	0.12
U	1158	GO:0046658	anchored component of plasma membrane	0.0069	0.1034
U	1159	GO:0006111	regulation of gluconeogenesis	0.0069	0.1
U	1160	GO:0022402	cell cycle process	0.0068	7.3667
U	1161	GO:0010605	negative regulation of macromolecule metabolic process	0.0068	4.3
U	1162	GO:0042127	regulation of cell proliferation	0.0068	4.1667
U	1163	GO:0005813	centrosome	0.0068	4.1
U	1164	GO:0032774	RNA biosynthetic process	0.0068	3.1
U	1165	GO:0034613	cellular protein localization	0.0068	2.5333
U	1166	GO:0019220	regulation of phosphate metabolic process	0.0068	1.0667
U	1167	GO:0001932	regulation of protein phosphorylation	0.0068	0.7931
U	1168	GO:0022604	regulation of cell morphogenesis	0.0068	0.6207
U	1169	GO:0015698	inorganic anion transport	0.0068	0.2667
U	1170	GO:0007611	learning or memory	0.0068	0.2667
U	1171	GO:0008150	biological_process	0.0067	90.8333
U	1172	GO:0048731	system development	0.0067	5.3
U	1173	GO:0008104	protein localization	0.0067	4.3667
U	1174	GO:0070727	cellular macromolecule localization	0.0067	2.4
U	1175	GO:0032989	cellular component morphogenesis	0.0067	0.4667
U	1176	GO:0000777	condensed chromosome kinetochore	0.0067	0.3793
U	1177	GO:0015103	inorganic anion transmembrane transporter activity	0.0067	0.3
U	1178	GO:0071559	response to transforming growth factor beta	0.0067	0.1538
U	1179	GO:0051198	negative regulation of coenzyme metabolic process	0.0067	0.1
U	1180	GO:0071371	cellular response to gonadotropin stimulus	0.0067	0.0435
U	1181	GO:0002824	positive regulation of adaptive immune response based on somatic recombination of immune receptors built from immunoglobulin superfamily domains	0.0067	0.037
U	1182	GO:0006479	protein methylation	0.0066	0.5667
U	1183	GO:0050890	cognition	0.0066	0.3103
U	1184	GO:0002237	response to molecule of bacterial origin	0.0066	0.1852
U	1185	GO:0044433	cytoplasmic vesicle part	0.0065	4.5667
U	1186	GO:0065009	regulation of molecular function	0.0065	4.5333
U	1187	GO:0050790	regulation of catalytic activity	0.0065	3.1
U	1188	GO:0001067	regulatory region nucleic acid binding	0.0065	0.7
U	1189	GO:0045893	positive regulation of transcription, DNA-templated	0.0065	0.6667
U	1190	GO:0005506	iron ion binding	0.0065	0.4
U	1191	GO:0051604	protein maturation	0.0065	0.3667
U	1192	GO:0043547	positive regulation of GTPase activity	0.0065	0.3333
U	1193	GO:0015276	ligand-gated ion channel activity	0.0065	0.2667
U	1194	GO:0008017	microtubule binding	0.0065	0.2
U	1195	GO:0006469	negative regulation of protein kinase activity	0.0065	0.2
U	1196	GO:0009057	macromolecule catabolic process	0.0065	0.1724
U	1197	GO:0002714	positive regulation of B cell mediated immunity	0.0065	0.0769
U	1198	GO:0031983	vesicle lumen	0.0065	0.069
U	1199	GO:0016070	RNA metabolic process	0.0064	4.8667
U	1200	GO:0032259	methylation	0.0064	0.5667
U	1201	GO:0015849	organic acid transport	0.0064	0.2593
U	1202	GO:0034698	response to gonadotropin	0.0064	0.0769
U	1203	GO:0005575	cellular_component	0.0063	74
U	1204	GO:0005789	endoplasmic reticulum membrane	0.0063	4.0667
U	1205	GO:0022414	reproductive process	0.0063	1.9333
U	1206	GO:0044092	negative regulation of molecular function	0.0063	0.8667
U	1207	GO:0050679	positive regulation of epithelial cell proliferation	0.0063	0.2593
U	1208	GO:0030335	positive regulation of cell migration	0.0063	0.1429
U	1209	GO:1901264	carbohydrate derivative transport	0.0063	0.0909
U	1210	GO:0030336	negative regulation of cell migration	0.0063	0.0909
U	1211	GO:0031410	cytoplasmic vesicle	0.0062	1.7
U	1212	GO:0042803	protein homodimerization activity	0.0062	1.1333
U	1213	GO:0030162	regulation of proteolysis	0.0062	0.7667
U	1214	GO:0007067	mitotic nuclear division	0.0062	0.7667
U	1215	GO:0010628	positive regulation of gene expression	0.0062	0.6333
U	1216	GO:0008213	protein alkylation	0.0062	0.4828
U	1217	GO:0045191	regulation of isotype switching	0.0062	0.1429
U	1218	GO:2001242	regulation of intrinsic apoptotic signaling pathway	0.0062	0.1333
U	1219	GO:0046823	negative regulation of nucleocytoplasmic transport	0.0062	0.1304
U	1220	GO:0005886	plasma membrane	0.0061	9.0667
U	1221	GO:0051130	positive regulation of cellular component organization	0.0061	1.7333
U	1222	GO:0051173	positive regulation of nitrogen compound metabolic process	0.0061	1.0333
U	1223	GO:0008202	steroid metabolic process	0.0061	0.5667
U	1224	GO:0043087	regulation of GTPase activity	0.0061	0.5333
U	1225	GO:1901652	response to peptide	0.0061	0.4
U	1226	GO:0031406	carboxylic acid binding	0.0061	0.2069
U	1227	GO:0001191	transcriptional repressor activity, RNA polymerase II transcription factor binding	0.0061	0.1818
U	1228	GO:0046324	regulation of glucose import	0.0061	0.0667
U	1229	GO:0030659	cytoplasmic vesicle membrane	0.006	1.7
U	1230	GO:1902532	negative regulation of intracellular signal transduction	0.006	0.7333
U	1231	GO:0051345	positive regulation of hydrolase activity	0.006	0.7241
U	1232	GO:0051347	positive regulation of transferase activity	0.006	0.7
U	1233	GO:0044708	single-organism behavior	0.006	0.4828
U	1234	GO:0045596	negative regulation of cell differentiation	0.006	0.2963
U	1235	GO:0044431	Golgi apparatus part	0.0059	3.7
U	1236	GO:0071705	nitrogen compound transport	0.0059	2
U	1237	GO:0048598	embryonic morphogenesis	0.0059	1.3333
U	1238	GO:1990837	sequence-specific double-stranded DNA binding	0.0059	1.0345
U	1239	GO:0000776	kinetochore	0.0059	0.3333
U	1240	GO:0001077	transcriptional activator activity, RNA polymerase II core promoter proximal region sequence-specific binding	0.0059	0.24
U	1241	GO:0048511	rhythmic process	0.0059	0.1905
U	1242	GO:0006942	regulation of striated muscle contraction	0.0059	0.125
U	1243	GO:0003677	DNA binding	0.0058	3.2333
U	1244	GO:0000151	ubiquitin ligase complex	0.0058	2.2667
U	1245	GO:0016773	phosphotransferase activity, alcohol group as acceptor	0.0058	1.4667
U	1246	GO:0046983	protein dimerization activity	0.0058	1.3333
U	1247	GO:0044389	ubiquitin-like protein ligase binding	0.0058	0.2857
U	1248	GO:0010562	positive regulation of phosphorus metabolic process	0.0058	0.2667
U	1249	GO:0070382	exocytic vesicle	0.0058	0.25
U	1250	GO:0002712	regulation of B cell mediated immunity	0.0058	0.12
U	1251	GO:0016787	hydrolase activity	0.0057	5.0333
U	1252	GO:0031400	negative regulation of protein modification process	0.0057	0.9333
U	1253	GO:0004672	protein kinase activity	0.0057	0.8
U	1254	GO:0003006	developmental process involved in reproduction	0.0057	0.4333
U	1255	GO:0043409	negative regulation of MAPK cascade	0.0057	0.3
U	1256	GO:0051056	regulation of small GTPase mediated signal transduction	0.0057	0.1333
U	1257	GO:0005737	cytoplasm	0.0056	30.3
U	1258	GO:0006357	regulation of transcription from RNA polymerase II promoter	0.0056	2.2333
U	1259	GO:0032940	secretion by cell	0.0056	1.9
U	1260	GO:0051241	negative regulation of multicellular organismal process	0.0056	1.4667
U	1261	GO:0007610	behavior	0.0056	0.7333
U	1262	GO:2001237	negative regulation of extrinsic apoptotic signaling pathway	0.0056	0.1429
U	1263	GO:0051236	establishment of RNA localization	0.0056	0.1154
U	1264	GO:0008144	drug binding	0.0056	0.1154
U	1265	GO:0008637	apoptotic mitochondrial changes	0.0056	0.0952
U	1266	GO:0045912	negative regulation of carbohydrate metabolic process	0.0056	0.0667
U	1267	GO:0009068	aspartate family amino acid catabolic process	0.0056	0.0556
U	1268	GO:0045725	positive regulation of glycogen biosynthetic process	0.0056	0.0417
U	1269	GO:0007605	sensory perception of sound	0.0056	0.0385
U	1270	GO:0008289	lipid binding	0.0055	0.8
U	1271	GO:0043269	regulation of ion transport	0.0055	0.5172
U	1272	GO:0002573	myeloid leukocyte differentiation	0.0055	0.1154
U	1273	GO:0006629	lipid metabolic process	0.0054	2.2
U	1274	GO:0030234	enzyme regulator activity	0.0054	0.7
U	1275	GO:0044451	nucleoplasm part	0.0054	0.6207
U	1276	GO:0098791	Golgi subcompartment	0.0054	0.6
U	1277	GO:0023014	signal transduction by protein phosphorylation	0.0054	0.3667
U	1278	GO:0019208	phosphatase regulator activity	0.0054	0.1379
U	1279	GO:0050871	positive regulation of B cell activation	0.0054	0.1
U	1280	GO:0016042	lipid catabolic process	0.0054	0.0769
U	1281	GO:0099080	supramolecular complex	0.0053	1.9667
U	1282	GO:0005874	microtubule	0.0053	1.1333
U	1283	GO:0080134	regulation of response to stress	0.0053	0.6
U	1284	GO:0000975	regulatory region DNA binding	0.0053	0.5
U	1285	GO:0080135	regulation of cellular response to stress	0.0053	0.3793
U	1286	GO:0005694	chromosome	0.0053	0.3667
U	1287	GO:0008217	regulation of blood pressure	0.0053	0.2667
U	1288	GO:0032496	response to lipopolysaccharide	0.0053	0.1667
U	1289	GO:0001190	transcriptional activator activity, RNA polymerase II transcription factor binding	0.0053	0.12
U	1290	GO:0032881	regulation of polysaccharide metabolic process	0.0053	0.08
U	1291	GO:0005504	fatty acid binding	0.0053	0.08
U	1292	GO:0016741	transferase activity, transferring one-carbon groups	0.0052	0.2857
U	1293	GO:0016667	oxidoreductase activity, acting on a sulfur group of donors	0.0052	0.1579
U	1294	GO:0051726	regulation of cell cycle	0.0051	3.1667
U	1295	GO:0031399	regulation of protein modification process	0.0051	2
U	1296	GO:0070011	peptidase activity, acting on L-amino acid peptides	0.0051	1.6333
U	1297	GO:0042325	regulation of phosphorylation	0.0051	0.6786
U	1298	GO:0016053	organic acid biosynthetic process	0.0051	0.5
U	1299	GO:0031401	positive regulation of protein modification process	0.0051	0.4286
U	1300	GO:1903827	regulation of cellular protein localization	0.0051	0.3182
U	1301	GO:0033044	regulation of chromosome organization	0.0051	0.2759
U	1302	GO:0060205	cytoplasmic vesicle lumen	0.0051	0.1429
U	1303	GO:0005758	mitochondrial intermembrane space	0.0051	0.1333
U	1304	GO:0071241	cellular response to inorganic substance	0.0051	0.0909
U	1305	GO:0005794	Golgi apparatus	0.005	2.4333
U	1306	GO:0005102	receptor binding	0.005	1.4667
U	1307	GO:0042886	amide transport	0.005	1.0667
U	1308	GO:0098772	molecular function regulator	0.005	0.9333
U	1309	GO:0071363	cellular response to growth factor stimulus	0.005	0.3
U	1310	GO:0050778	positive regulation of immune response	0.005	0.2667
U	1311	GO:0006937	regulation of muscle contraction	0.005	0.12
U	1312	GO:0051216	cartilage development	0.005	0.0952
U	1313	GO:0008283	cell proliferation	0.0049	1.3
U	1314	GO:0099513	polymeric cytoskeletal fiber	0.0049	1.1
U	1315	GO:0000981	RNA polymerase II transcription factor activity, sequence-specific DNA binding	0.0049	0.4643
U	1316	GO:0051259	protein oligomerization	0.0049	0.3704
U	1317	GO:0016571	histone methylation	0.0049	0.3103
U	1318	GO:0001934	positive regulation of protein phosphorylation	0.0049	0.2069
U	1319	GO:0099572	postsynaptic specialization	0.0049	0.12
U	1320	GO:0051881	regulation of mitochondrial membrane potential	0.0049	0.1053
U	1321	GO:0090304	nucleic acid metabolic process	0.0048	5.3
U	1322	GO:0045786	negative regulation of cell cycle	0.0048	2.1333
U	1323	GO:0008233	peptidase activity	0.0048	1.4333
U	1324	GO:0003690	double-stranded DNA binding	0.0048	0.6207
U	1325	GO:0016604	nuclear body	0.0048	0.4828
U	1326	GO:0007154	cell communication	0.0048	0.3667
U	1327	GO:0007420	brain development	0.0048	0.3448
U	1328	GO:0060249	anatomical structure homeostasis	0.0048	0.1667
U	1329	GO:0002705	positive regulation of leukocyte mediated immunity	0.0048	0.0476
U	1330	GO:0002683	negative regulation of immune system process	0.0048	0.0435
U	1331	GO:0031226	intrinsic component of plasma membrane	0.0047	3.4333
U	1332	GO:0005773	vacuole	0.0047	0.8333
U	1333	GO:0033365	protein localization to organelle	0.0047	0.4
U	1334	GO:0071356	cellular response to tumor necrosis factor	0.0047	0.3333
U	1335	GO:0051101	regulation of DNA binding	0.0047	0.2308
U	1336	GO:0019827	stem cell population maintenance	0.0047	0.1579
U	1337	GO:0032102	negative regulation of response to external stimulus	0.0047	0.12
U	1338	GO:0033554	cellular response to stress	0.0046	2.0667
U	1339	GO:0015833	peptide transport	0.0046	1.1333
U	1340	GO:0033043	regulation of organelle organization	0.0046	0.8667
U	1341	GO:0044456	synapse part	0.0046	0.7333
U	1342	GO:0032269	negative regulation of cellular protein metabolic process	0.0046	0.7
U	1343	GO:0071560	cellular response to transforming growth factor beta stimulus	0.0046	0.1176
U	1344	GO:1990234	transferase complex	0.0045	1.9333
U	1345	GO:0043086	negative regulation of catalytic activity	0.0045	0.6333
U	1346	GO:0051348	negative regulation of transferase activity	0.0045	0.2
U	1347	GO:0099081	supramolecular polymer	0.0044	1.6667
U	1348	GO:0060089	molecular transducer activity	0.0044	1.4667
U	1349	GO:0045936	negative regulation of phosphate metabolic process	0.0044	0.7667
U	1350	GO:0034976	response to endoplasmic reticulum stress	0.0044	0.6
U	1351	GO:0044087	regulation of cellular component biogenesis	0.0044	0.3333
U	1352	GO:0030133	transport vesicle	0.0044	0.1429
U	1353	GO:0099512	supramolecular fiber	0.0043	1.3333
U	1354	GO:0016462	pyrophosphatase activity	0.0043	1.3
U	1355	GO:0006694	steroid biosynthetic process	0.0043	0.4
U	1356	GO:0000323	lytic vacuole	0.0042	0.6
U	1357	GO:0000790	nuclear chromatin	0.0042	0.4667
U	1358	GO:0046394	carboxylic acid biosynthetic process	0.0042	0.4333
U	1359	GO:0070161	anchoring junction	0.0042	0.4
U	1360	GO:0051254	positive regulation of RNA metabolic process	0.0042	0.3333
U	1361	GO:1990748	cellular detoxification	0.0042	0.1667
U	1362	GO:0015718	monocarboxylic acid transport	0.0042	0.1176
U	1363	GO:0072331	signal transduction by p53 class mediator	0.0042	0.0833
U	1364	GO:0044247	cellular polysaccharide catabolic process	0.0042	0.0769
U	1365	GO:0007601	visual perception	0.0042	0.0769
U	1366	GO:0061134	peptidase regulator activity	0.0042	0.0667
U	1367	GO:0030278	regulation of ossification	0.0042	0.0476
U	1368	GO:0032946	positive regulation of mononuclear cell proliferation	0.0042	0.0455
U	1369	GO:0000272	polysaccharide catabolic process	0.0042	0.0435
U	1370	GO:0019439	aromatic compound catabolic process	0.0042	0.0417
U	1371	GO:0051302	regulation of cell division	0.0042	0.0385
U	1372	GO:0044459	plasma membrane part	0.0041	3.8
U	1373	GO:0000982	transcription factor activity, RNA polymerase II core promoter proximal region sequence-specific binding	0.0041	0.2222
U	1374	GO:0008047	enzyme activator activity	0.0041	0.2069
U	1375	GO:0006875	cellular metal ion homeostasis	0.0041	0.1429
U	1376	GO:0071345	cellular response to cytokine stimulus	0.0041	0.1053
U	1377	GO:0050680	negative regulation of epithelial cell proliferation	0.0041	0.0769
U	1378	GO:0008610	lipid biosynthetic process	0.004	0.7
U	1379	GO:0045862	positive regulation of proteolysis	0.004	0.4333
U	1380	GO:0006501	C-terminal protein lipidation	0.004	0.4333
U	1381	GO:0001525	angiogenesis	0.004	0.1724
U	1382	GO:0010951	negative regulation of endopeptidase activity	0.004	0.0909
U	1383	GO:0008016	regulation of heart contraction	0.004	0.087
U	1384	GO:0005887	integral component of plasma membrane	0.0039	2.6
U	1385	GO:0046903	secretion	0.0039	1.3667
U	1386	GO:0044255	cellular lipid metabolic process	0.0039	0.8667
U	1387	GO:0045055	regulated exocytosis	0.0039	0.6333
U	1388	GO:0048285	organelle fission	0.0039	0.5
U	1389	GO:0005543	phospholipid binding	0.0039	0.4333
U	1390	GO:0005516	calmodulin binding	0.0039	0.4333
U	1391	GO:0018410	C-terminal protein amino acid modification	0.0039	0.3667
U	1392	GO:0051640	organelle localization	0.0039	0.3333
U	1393	GO:0030111	regulation of Wnt signaling pathway	0.0039	0.2963
U	1394	GO:1901031	regulation of response to reactive oxygen species	0.0039	0.069
U	1395	GO:0007399	nervous system development	0.0038	1.8333
U	1396	GO:0097708	intracellular vesicle	0.0038	1.0667
U	1397	GO:0005764	lysosome	0.0038	0.6
U	1398	GO:0016197	endosomal transport	0.0038	0.3667
U	1399	GO:0016818	hydrolase activity, acting on acid anhydrides, in phosphorus-containing anhydrides	0.0037	1
U	1400	GO:0016817	hydrolase activity, acting on acid anhydrides	0.0037	0.9
U	1401	GO:0043687	post-translational protein modification	0.0037	0.3667
U	1402	GO:0001933	negative regulation of protein phosphorylation	0.0037	0.3
U	1403	GO:0043408	regulation of MAPK cascade	0.0037	0.2667
U	1404	GO:0007596	blood coagulation	0.0037	0.1
U	1405	GO:0010632	regulation of epithelial cell migration	0.0037	0.0769
U	1406	GO:0006919	activation of cysteine-type endopeptidase activity involved in apoptotic process	0.0037	0.0714
U	1407	GO:0045861	negative regulation of proteolysis	0.0037	0.0556
U	1408	GO:0097190	apoptotic signaling pathway	0.0037	0.0417
U	1409	GO:0042102	positive regulation of T cell proliferation	0.0037	0.0417
U	1410	GO:0010828	positive regulation of glucose transport	0.0037	0.0385
U	1411	GO:0019787	ubiquitin-like protein transferase activity	0.0036	1.6667
U	1412	GO:0044437	vacuolar part	0.0036	1.2333
U	1413	GO:0006508	proteolysis	0.0036	1.1333
U	1414	GO:0031329	regulation of cellular catabolic process	0.0036	0.3103
U	1415	GO:1903522	regulation of blood circulation	0.0036	0.2308
U	1416	GO:0005096	GTPase activator activity	0.0036	0.2069
U	1417	GO:0007265	Ras protein signal transduction	0.0036	0.1379
U	1418	GO:0005244	voltage-gated ion channel activity	0.0036	0.125
U	1419	GO:0002576	platelet degranulation	0.0036	0.087
U	1420	GO:0043392	negative regulation of DNA binding	0.0036	0.0741
U	1421	GO:0055001	muscle cell development	0.0036	0.0714
U	1422	GO:0015031	protein transport	0.0035	0.9
U	1423	GO:0005768	endosome	0.0035	0.5667
U	1424	GO:0046649	lymphocyte activation	0.0035	0.4333
U	1425	GO:0009894	regulation of catabolic process	0.0035	0.3667
U	1426	GO:0030658	transport vesicle membrane	0.0035	0.2333
U	1427	GO:0051648	vesicle localization	0.0035	0.1667
U	1428	GO:0038024	cargo receptor activity	0.0035	0.0833
U	1429	GO:0004872	receptor activity	0.0034	1.2
U	1430	GO:0000139	Golgi membrane	0.0034	1.1333
U	1431	GO:0030177	positive regulation of Wnt signaling pathway	0.0033	0.0526
U	1432	GO:0045981	positive regulation of nucleotide metabolic process	0.0032	0.2
U	1433	GO:0050731	positive regulation of peptidyl-tyrosine phosphorylation	0.0032	0.1667
U	1434	GO:0031253	cell projection membrane	0.0032	0.1
U	1435	GO:0000018	regulation of DNA recombination	0.0032	0.0741
U	1436	GO:0051656	establishment of organelle localization	0.0031	0.2759
U	1437	GO:0010564	regulation of cell cycle process	0.0031	0.2
U	1438	GO:0006631	fatty acid metabolic process	0.0031	0.1667
U	1439	GO:0042578	phosphoric ester hydrolase activity	0.003	0.3333
U	1440	GO:0016311	dephosphorylation	0.003	0.25
U	1441	GO:0005856	cytoskeleton	0.003	0.2333
U	1442	GO:0006520	cellular amino acid metabolic process	0.003	0.1053
U	1443	GO:0016605	PML body	0.003	0.0741
U	1444	GO:1903533	regulation of protein targeting	0.003	0.0667
U	1445	GO:0017111	nucleoside-triphosphatase activity	0.0029	0.8667
U	1446	GO:0000280	nuclear division	0.0029	0.4667
U	1447	GO:0010008	endosome membrane	0.0029	0.4
U	1448	GO:0006497	protein lipidation	0.0029	0.2667
U	1449	GO:1901617	organic hydroxy compound biosynthetic process	0.0029	0.1667
U	1450	GO:1901863	positive regulation of muscle tissue development	0.0029	0.1429
U	1451	GO:0000228	nuclear chromosome	0.0029	0.1034
U	1452	GO:0014904	myotube cell development	0.0029	0.0741
U	1453	GO:0051928	positive regulation of calcium ion transport	0.0029	0.0667
U	1454	GO:0005765	lysosomal membrane	0.0028	0.7333
U	1455	GO:0036064	ciliary basal body	0.0028	0.4
U	1456	GO:0009896	positive regulation of catabolic process	0.0028	0.1724
U	1457	GO:0020037	heme binding	0.0028	0.1667
U	1458	GO:0050657	nucleic acid transport	0.0028	0.1481
U	1459	GO:2000147	positive regulation of cell motility	0.0028	0.1071
U	1460	GO:0098754	detoxification	0.0028	0.1
U	1461	GO:0006103	2-oxoglutarate metabolic process	0.0028	0.0667
U	1462	GO:0006939	smooth muscle contraction	0.0028	0.0556
U	1463	GO:0010812	negative regulation of cell-substrate adhesion	0.0028	0.04
U	1464	GO:0030674	protein binding, bridging	0.0028	0.0385
U	1465	GO:1900407	regulation of cellular response to oxidative stress	0.0028	0.037
U	1466	GO:0042440	pigment metabolic process	0.0028	0.0357
U	1467	GO:0099600	transmembrane receptor activity	0.0027	0.6333
U	1468	GO:0044440	endosomal part	0.0027	0.5667
U	1469	GO:0006259	DNA metabolic process	0.0027	0.3333
U	1470	GO:0031902	late endosome membrane	0.0027	0.2667
U	1471	GO:1901981	phosphatidylinositol phosphate binding	0.0027	0.1
U	1472	GO:0044441	ciliary part	0.0026	0.5333
U	1473	GO:0006886	intracellular protein transport	0.0026	0.2333
U	1474	GO:0005911	cell-cell junction	0.0026	0.2333
U	1475	GO:0010466	negative regulation of peptidase activity	0.0026	0.1579
U	1476	GO:0001701	in utero embryonic development	0.0026	0.1333
U	1477	GO:0071902	positive regulation of protein serine/threonine kinase activity	0.0026	0.0952
U	1478	GO:0005924	cell-substrate adherens junction	0.0026	0.08
U	1479	GO:0044419	interspecies interaction between organisms	0.0026	0.0741
U	1480	GO:0043207	response to external biotic stimulus	0.0026	0.0667
U	1481	GO:0045121	membrane raft	0.0026	0.0455
U	1482	GO:1901565	organonitrogen compound catabolic process	0.0026	0.04
U	1483	GO:1902882	regulation of response to oxidative stress	0.0026	0.0385
U	1484	GO:0032561	guanyl ribonucleotide binding	0.0025	0.7
U	1485	GO:0050839	cell adhesion molecule binding	0.0025	0.3
U	1486	GO:0022838	substrate-specific channel activity	0.0025	0.2
U	1487	GO:0030027	lamellipodium	0.0025	0.1304
U	1488	GO:0060326	cell chemotaxis	0.0025	0.087
U	1489	GO:0035264	multicellular organism growth	0.0025	0.0741
U	1490	GO:0045471	response to ethanol	0.0025	0.0714
U	1491	GO:0032550	purine ribonucleoside binding	0.0024	0.6667
U	1492	GO:0006887	exocytosis	0.0024	0.4
U	1493	GO:0007600	sensory perception	0.0024	0.2069
U	1494	GO:0015079	potassium ion transmembrane transporter activity	0.0024	0.1364
U	1495	GO:0045944	positive regulation of transcription from RNA polymerase II promoter	0.0024	0.1154
U	1496	GO:2000021	regulation of ion homeostasis	0.0024	0.1
U	1497	GO:0071219	cellular response to molecule of bacterial origin	0.0024	0.0833
U	1498	GO:0050801	ion homeostasis	0.0024	0.08
U	1499	GO:0008654	phospholipid biosynthetic process	0.0024	0.069
U	1500	GO:0004601	peroxidase activity	0.0024	0.0667
U	1501	GO:0034655	nucleobase-containing compound catabolic process	0.0024	0.0526
U	1502	GO:0009897	external side of plasma membrane	0.0024	0.0476
U	1503	GO:0007275	multicellular organism development	0.0023	0.2667
U	1504	GO:0005912	adherens junction	0.0023	0.2667
U	1505	GO:0005216	ion channel activity	0.0023	0.2069
U	1506	GO:0033762	response to glucagon	0.0023	0.1071
U	1507	GO:0004871	signal transducer activity	0.0022	0.6667
U	1508	GO:0004842	ubiquitin-protein transferase activity	0.0022	0.4333
U	1509	GO:0044772	mitotic cell cycle phase transition	0.0022	0.1481
U	1510	GO:0030667	secretory granule membrane	0.0022	0.1034
U	1511	GO:1901861	regulation of muscle tissue development	0.0022	0.1
U	1512	GO:0016209	antioxidant activity	0.0022	0.1
U	1513	GO:0051224	negative regulation of protein transport	0.0022	0.0833
U	1514	GO:0010810	regulation of cell-substrate adhesion	0.0022	0.0769
U	1515	GO:0016050	vesicle organization	0.0022	0.069
U	1516	GO:0006605	protein targeting	0.0022	0.0667
U	1517	GO:0070542	response to fatty acid	0.0022	0.0588
U	1518	GO:0071867	response to monoamine	0.0022	0.0556
U	1519	GO:1901606	alpha-amino acid catabolic process	0.0022	0.05
U	1520	GO:0097529	myeloid leukocyte migration	0.0022	0.0476
U	1521	GO:0043025	neuronal cell body	0.0022	0.04
U	1522	GO:0001885	endothelial cell development	0.0022	0.0385
U	1523	GO:0001883	purine nucleoside binding	0.0021	0.6667
U	1524	GO:0005774	vacuolar membrane	0.0021	0.6333
U	1525	GO:0032549	ribonucleoside binding	0.0021	0.6
U	1526	GO:0031331	positive regulation of cellular catabolic process	0.0021	0.1379
U	1527	GO:0005261	cation channel activity	0.0021	0.1053
U	1528	GO:0061138	morphogenesis of a branching epithelium	0.0021	0.0769
U	1529	GO:0044700	single organism signaling	0.0021	0.069
U	1530	GO:0032414	positive regulation of ion transmembrane transporter activity	0.0021	0.05
U	1531	GO:0002702	positive regulation of production of molecular mediator of immune response	0.0021	0.0417
U	1532	GO:0099503	secretory vesicle	0.0021	0.0385
U	1533	GO:0032446	protein modification by small protein conjugation	0.002	0.6667
U	1534	GO:0098852	lytic vacuole membrane	0.002	0.5
U	1535	GO:0061695	transferase complex, transferring phosphorus-containing groups	0.002	0.1667
U	1536	GO:0006914	autophagy	0.002	0.0769
U	1537	GO:0007346	regulation of mitotic cell cycle	0.002	0.0714
U	1538	GO:0071496	cellular response to external stimulus	0.002	0.0667
U	1539	GO:0006310	DNA recombination	0.0019	0.3333
U	1540	GO:0050878	regulation of body fluid levels	0.0019	0.2
U	1541	GO:0030695	GTPase regulator activity	0.0019	0.1667
U	1542	GO:0043434	response to peptide hormone	0.0019	0.1
U	1543	GO:1900180	regulation of protein localization to nucleus	0.0019	0.0769
U	1544	GO:0032465	regulation of cytokinesis	0.0019	0.0667
U	1545	GO:0007267	cell-cell signaling	0.0019	0.0667
U	1546	GO:0006869	lipid transport	0.0019	0.0588
U	1547	GO:0004866	endopeptidase inhibitor activity	0.0019	0.0556
U	1548	GO:0005525	GTP binding	0.0018	0.6
U	1549	GO:0002252	immune effector process	0.0018	0.3
U	1550	GO:0000287	magnesium ion binding	0.0018	0.2667
U	1551	GO:0048017	inositol lipid-mediated signaling	0.0018	0.0714
U	1552	GO:0030166	proteoglycan biosynthetic process	0.0018	0.0556
U	1553	GO:0002706	regulation of lymphocyte mediated immunity	0.0018	0.0455
U	1554	GO:0098573	intrinsic component of mitochondrial membrane	0.0018	0.0385
U	1555	GO:0007017	microtubule-based process	0.0018	0.0385
U	1556	GO:0001012	RNA polymerase II regulatory region DNA binding	0.0017	0.1923
U	1557	GO:0005622	intracellular	0.0017	0.125
U	1558	GO:0043009	chordate embryonic development	0.0017	0.1111
U	1559	GO:0099537	trans-synaptic signaling	0.0017	0.1
U	1560	GO:0006873	cellular ion homeostasis	0.0017	0.0833
U	1561	GO:0031668	cellular response to extracellular stimulus	0.0017	0.0556
U	1562	GO:0030518	intracellular steroid hormone receptor signaling pathway	0.0017	0.0556
U	1563	GO:0070873	regulation of glycogen metabolic process	0.0017	0.037
U	1564	GO:0007186	G-protein coupled receptor signaling pathway	0.0016	0.7667
U	1565	GO:0016567	protein ubiquitination	0.0016	0.6333
U	1566	GO:0051704	multi-organism process	0.0016	0.1333
U	1567	GO:0032386	regulation of intracellular transport	0.0016	0.1333
U	1568	GO:0006974	cellular response to DNA damage stimulus	0.0016	0.0952
U	1569	GO:0098916	anterograde trans-synaptic signaling	0.0016	0.0714
U	1570	GO:0040008	regulation of growth	0.0016	0.069
U	1571	GO:0001047	core promoter binding	0.0016	0.0667
U	1572	GO:0046902	regulation of mitochondrial membrane permeability	0.0016	0.04
U	1573	GO:0051276	chromosome organization	0.0015	0.2069
U	1574	GO:0006644	phospholipid metabolic process	0.0015	0.1667
U	1575	GO:0006338	chromatin remodeling	0.0015	0.1333
U	1576	GO:0002768	immune response-regulating cell surface receptor signaling pathway	0.0015	0.125
U	1577	GO:0000902	cell morphogenesis	0.0015	0.1071
U	1578	GO:0006813	potassium ion transport	0.0015	0.1053
U	1579	GO:0060090	binding, bridging	0.0015	0.069
U	1580	GO:0007268	chemical synaptic transmission	0.0015	0.069
U	1581	GO:0098552	side of membrane	0.0015	0.0556
U	1582	GO:0048608	reproductive structure development	0.0015	0.0417
U	1583	GO:0070647	protein modification by small protein conjugation or removal	0.0014	0.4333
U	1584	GO:0005730	nucleolus	0.0014	0.3667
U	1585	GO:0008168	methyltransferase activity	0.0014	0.1333
U	1586	GO:0048284	organelle fusion	0.0014	0.1071
U	1587	GO:0043405	regulation of MAP kinase activity	0.0014	0.1
U	1588	GO:0006073	cellular glucan metabolic process	0.0014	0.0625
U	1589	GO:0055002	striated muscle cell development	0.0014	0.037
U	1590	GO:0002064	epithelial cell development	0.0014	0.0357
U	1591	GO:0007264	small GTPase mediated signal transduction	0.0013	0.3
U	1592	GO:0098656	anion transmembrane transport	0.0013	0.0833
U	1593	GO:0019001	guanyl nucleotide binding	0.0012	0.3333
U	1594	GO:0044454	nuclear chromosome part	0.0012	0.2
U	1595	GO:0046822	regulation of nucleocytoplasmic transport	0.0012	0.087
U	1596	GO:0008406	gonad development	0.0012	0.0769
U	1597	GO:0004857	enzyme inhibitor activity	0.0012	0.0435
U	1598	GO:0030425	dendrite	0.0012	0.0417
U	1599	GO:0006650	glycerophospholipid metabolic process	0.0012	0.0345
U	1600	GO:0000977	RNA polymerase II regulatory region sequence-specific DNA binding	0.0011	0.1481
U	1601	GO:0045787	positive regulation of cell cycle	0.0011	0.1111
U	1602	GO:0016705	oxidoreductase activity, acting on paired donors, with incorporation or reduction of molecular oxygen	0.0011	0.1
U	1603	GO:0051082	unfolded protein binding	0.0011	0.0526
U	1604	GO:1902904	negative regulation of supramolecular fiber organization	0.0011	0.0455
U	1605	GO:0007266	Rho protein signal transduction	0.0011	0.04
U	1606	GO:0031490	chromatin DNA binding	0.0011	0.0357
U	1607	GO:0099536	synaptic signaling	0.0011	0.0333
U	1608	GO:0046474	glycerophospholipid biosynthetic process	0.0011	0.0333
U	1609	GO:0001882	nucleoside binding	0.001	0.3
U	1610	GO:1905114	cell surface receptor signaling pathway involved in cell-cell signaling	0.001	0.1875
U	1611	GO:0050658	RNA transport	0.001	0.1111
U	1612	GO:0043406	positive regulation of MAP kinase activity	0.001	0.0833
U	1613	GO:0002027	regulation of heart rate	0.001	0.0769
U	1614	GO:0051650	establishment of vesicle localization	0.001	0.069
U	1615	GO:0002274	myeloid leukocyte activation	0.001	0.0667
U	1616	GO:0005088	Ras guanyl-nucleotide exchange factor activity	0.001	0.05
U	1617	GO:0009895	negative regulation of catabolic process	0.001	0.04
U	1618	GO:0031301	integral component of organelle membrane	0.001	0.0385
U	1619	GO:0001763	morphogenesis of a branching structure	0.001	0.0385
U	1620	GO:0034248	regulation of cellular amide metabolic process	0.001	0.037
U	1621	GO:0035304	regulation of protein dephosphorylation	0.001	0.0345
U	1622	GO:0008544	epidermis development	0.001	0.0333
U	1623	GO:0004888	transmembrane signaling receptor activity	0.0009	0.1667
U	1624	GO:0030258	lipid modification	0.0009	0.0714
U	1625	GO:1902903	regulation of supramolecular fiber organization	0.0009	0.0526
U	1626	GO:2001244	positive regulation of intrinsic apoptotic signaling pathway	0.0009	0.0455
U	1627	GO:0043197	dendritic spine	0.0009	0.04
U	1628	GO:2001236	regulation of extrinsic apoptotic signaling pathway	0.0009	0.0385
U	1629	GO:0019722	calcium-mediated signaling	0.0009	0.0357
U	1630	GO:0009636	response to toxic substance	0.0009	0.0357
U	1631	GO:0030003	cellular cation homeostasis	0.0008	0.0741
U	1632	GO:0045937	positive regulation of phosphate metabolic process	0.0008	0.0714
U	1633	GO:0043254	regulation of protein complex assembly	0.0008	0.0526
U	1634	GO:0002700	regulation of production of molecular mediator of immune response	0.0008	0.0435
U	1635	GO:2001243	negative regulation of intrinsic apoptotic signaling pathway	0.0008	0.0417
U	1636	GO:0044262	cellular carbohydrate metabolic process	0.0008	0.0385
U	1637	GO:0031256	leading edge membrane	0.0008	0.0385
U	1638	GO:0010827	regulation of glucose transport	0.0008	0.037
U	1639	GO:0050954	sensory perception of mechanical stimulus	0.0008	0.0357
U	1640	GO:0003924	GTPase activity	0.0007	0.1333
U	1641	GO:0098609	cell-cell adhesion	0.0007	0.069
U	1642	GO:0098794	postsynapse	0.0007	0.05
U	1643	GO:0004518	nuclease activity	0.0007	0.0435
U	1644	GO:0072503	cellular divalent inorganic cation homeostasis	0.0007	0.04
U	1645	GO:0034705	potassium channel complex	0.0007	0.0357
U	1646	GO:0046943	carboxylic acid transmembrane transporter activity	0.0007	0.0345
U	1647	GO:0045211	postsynaptic membrane	0.0007	0.0333
U	1648	GO:0016055	Wnt signaling pathway	0.0006	0.125
U	1649	GO:0090068	positive regulation of cell cycle process	0.0006	0.0741
U	1650	GO:0048732	gland development	0.0006	0.0435
U	1651	GO:0060828	regulation of canonical Wnt signaling pathway	0.0006	0.0385
U	1652	GO:0040017	positive regulation of locomotion	0.0005	0.0833
U	1653	GO:0061025	membrane fusion	0.0005	0.069
U	1654	GO:0001664	G-protein coupled receptor binding	0.0005	0.069
U	1655	GO:0044452	nucleolar part	0.0005	0.0667
U	1656	GO:0071805	potassium ion transmembrane transport	0.0005	0.0435
U	1657	GO:0070663	regulation of leukocyte proliferation	0.0005	0.0385
U	1658	GO:0055074	calcium ion homeostasis	0.0005	0.037
U	1659	GO:0001227	transcriptional repressor activity, RNA polymerase II transcription regulatory region sequence-specific binding	0.0005	0.037
U	1660	GO:0044265	cellular macromolecule catabolic process	0.0004	0.0667
U	1661	GO:0009607	response to biotic stimulus	0.0004	0.0667
U	1662	GO:0006470	protein dephosphorylation	0.0004	0.0417
U	1663	GO:0004519	endonuclease activity	0.0004	0.037
U	1664	GO:0046906	tetrapyrrole binding	0.0004	0.0333
U	1665	GO:0009416	response to light stimulus	0.0004	0.0333
U	1666	GO:0038023	signaling receptor activity	0.0003	0.1
U	1667	GO:0071804	cellular potassium ion transport	0.0003	0.05
U	1668	GO:0044449	contractile fiber part	0.0003	0.0476
U	1669	GO:0005085	guanyl-nucleotide exchange factor activity	0.0003	0.0476
U	1670	GO:0090305	nucleic acid phosphodiester bond hydrolysis	0.0003	0.0385
U	1671	GO:0071900	regulation of protein serine/threonine kinase activity	0.0002	0.0333
U	1672	GO:0006396	RNA processing	0.0001	0.0333
U	1673	GO:2001258	negative regulation of cation channel activity	0	0
U	1674	GO:2001252	positive regulation of chromosome organization	0	0
U	1675	GO:2001240	negative regulation of extrinsic apoptotic signaling pathway in absence of ligand	0	0
U	1676	GO:2001239	regulation of extrinsic apoptotic signaling pathway in absence of ligand	0	0
U	1677	GO:2001022	positive regulation of response to DNA damage stimulus	0	0
U	1678	GO:2001020	regulation of response to DNA damage stimulus	0	0
U	1679	GO:2000779	regulation of double-strand break repair	0	0
U	1680	GO:2000727	positive regulation of cardiac muscle cell differentiation	0	0
U	1681	GO:2000725	regulation of cardiac muscle cell differentiation	0	0
U	1682	GO:2000679	positive regulation of transcription regulatory region DNA binding	0	0
U	1683	GO:2000678	negative regulation of transcription regulatory region DNA binding	0	0
U	1684	GO:2000648	positive regulation of stem cell proliferation	0	0
U	1685	GO:2000573	positive regulation of DNA biosynthetic process	0	0
U	1686	GO:2000505	regulation of energy homeostasis	0	0
U	1687	GO:2000310	regulation of NMDA receptor activity	0	0
U	1688	GO:2000278	regulation of DNA biosynthetic process	0	0
U	1689	GO:2000273	positive regulation of receptor activity	0	0
U	1690	GO:2000242	negative regulation of reproductive process	0	0
U	1691	GO:2000241	regulation of reproductive process	0	0
U	1692	GO:2000134	negative regulation of G1/S transition of mitotic cell cycle	0	0
U	1693	GO:2000117	negative regulation of cysteine-type endopeptidase activity	0	0
U	1694	GO:2000045	regulation of G1/S transition of mitotic cell cycle	0	0
U	1695	GO:2000027	regulation of organ morphogenesis	0	0
U	1696	GO:1990845	adaptive thermogenesis	0	0
U	1697	GO:1990841	promoter-specific chromatin binding	0	0
U	1698	GO:1990777	lipoprotein particle	0	0
U	1699	GO:1990266	neutrophil migration	0	0
U	1700	GO:1990138	neuron projection extension	0	0
U	1701	GO:1990089	response to nerve growth factor	0	0
U	1702	GO:1905952	regulation of lipid localization	0	0
U	1703	GO:1905330	regulation of morphogenesis of an epithelium	0	0
U	1704	GO:1905276	regulation of epithelial tube formation	0	0
U	1705	GO:1905209	positive regulation of cardiocyte differentiation	0	0
U	1706	GO:1905207	regulation of cardiocyte differentiation	0	0
U	1707	GO:1905039	carboxylic acid transmembrane transport	0	0
U	1708	GO:1904894	positive regulation of STAT cascade	0	0
U	1709	GO:1904892	regulation of STAT cascade	0	0
U	1710	GO:1904680	peptide transmembrane transporter activity	0	0
U	1711	GO:1904591	positive regulation of protein import	0	0
U	1712	GO:1904590	negative regulation of protein import	0	0
U	1713	GO:1904589	regulation of protein import	0	0
U	1714	GO:1904358	positive regulation of telomere maintenance via telomere lengthening	0	0
U	1715	GO:1904356	regulation of telomere maintenance via telomere lengthening	0	0
U	1716	GO:1904355	positive regulation of telomere capping	0	0
U	1717	GO:1904353	regulation of telomere capping	0	0
U	1718	GO:1904063	negative regulation of cation transmembrane transport	0	0
U	1719	GO:1904037	positive regulation of epithelial cell apoptotic process	0	0
U	1720	GO:1904035	regulation of epithelial cell apoptotic process	0	0
U	1721	GO:1904019	epithelial cell apoptotic process	0	0
U	1722	GO:1903844	regulation of cellular response to transforming growth factor beta stimulus	0	0
U	1723	GO:1903829	positive regulation of cellular protein localization	0	0
U	1724	GO:1903825	organic acid transmembrane transport	0	0
U	1725	GO:1903747	regulation of establishment of protein localization to mitochondrion	0	0
U	1726	GO:1903706	regulation of hemopoiesis	0	0
U	1727	GO:1903579	negative regulation of ATP metabolic process	0	0
U	1728	GO:1903531	negative regulation of secretion by cell	0	0
U	1729	GO:1903524	positive regulation of blood circulation	0	0
U	1730	GO:1903523	negative regulation of blood circulation	0	0
U	1731	GO:1903509	liposaccharide metabolic process	0	0
U	1732	GO:1903364	positive regulation of cellular protein catabolic process	0	0
U	1733	GO:1903362	regulation of cellular protein catabolic process	0	0
U	1734	GO:1903321	negative regulation of protein modification by small protein conjugation or removal	0	0
U	1735	GO:1903320	regulation of protein modification by small protein conjugation or removal	0	0
U	1736	GO:1903305	regulation of regulated secretory pathway	0	0
U	1737	GO:1903293	phosphatase complex	0	0
U	1738	GO:1903209	positive regulation of oxidative stress-induced cell death	0	0
U	1739	GO:1903206	negative regulation of hydrogen peroxide-induced cell death	0	0
U	1740	GO:1903202	negative regulation of oxidative stress-induced cell death	0	0
U	1741	GO:1903201	regulation of oxidative stress-induced cell death	0	0
U	1742	GO:1903170	negative regulation of calcium ion transmembrane transport	0	0
U	1743	GO:1903146	regulation of mitophagy	0	0
U	1744	GO:1903115	regulation of actin filament-based movement	0	0
U	1745	GO:1903052	positive regulation of proteolysis involved in cellular protein catabolic process	0	0
U	1746	GO:1903050	regulation of proteolysis involved in cellular protein catabolic process	0	0
U	1747	GO:1903046	meiotic cell cycle process	0	0
U	1748	GO:1903020	positive regulation of glycoprotein metabolic process	0	0
U	1749	GO:1903008	organelle disassembly	0	0
U	1750	GO:1902936	phosphatidylinositol bisphosphate binding	0	0
U	1751	GO:1902911	protein kinase complex	0	0
U	1752	GO:1902884	positive regulation of response to oxidative stress	0	0
U	1753	GO:1902883	negative regulation of response to oxidative stress	0	0
U	1754	GO:1902850	microtubule cytoskeleton organization involved in mitosis	0	0
U	1755	GO:1902807	negative regulation of cell cycle G1/S phase transition	0	0
U	1756	GO:1902806	regulation of cell cycle G1/S phase transition	0	0
U	1757	GO:1902745	positive regulation of lamellipodium organization	0	0
U	1758	GO:1902743	regulation of lamellipodium organization	0	0
U	1759	GO:1902668	negative regulation of axon guidance	0	0
U	1760	GO:1902667	regulation of axon guidance	0	0
U	1761	GO:1902554	serine/threonine protein kinase complex	0	0
U	1762	GO:1902403	signal transduction involved in mitotic DNA integrity checkpoint	0	0
U	1763	GO:1902402	signal transduction involved in mitotic DNA damage checkpoint	0	0
U	1764	GO:1902400	intracellular signal transduction involved in G1 DNA damage checkpoint	0	0
U	1765	GO:1902275	regulation of chromatin organization	0	0
U	1766	GO:1902229	regulation of intrinsic apoptotic signaling pathway in response to DNA damage	0	0
U	1767	GO:1902224	ketone body metabolic process	0	0
U	1768	GO:1902176	negative regulation of oxidative stress-induced intrinsic apoptotic signaling pathway	0	0
U	1769	GO:1902175	regulation of oxidative stress-induced intrinsic apoptotic signaling pathway	0	0
U	1770	GO:1902170	cellular response to reactive nitrogen species	0	0
U	1771	GO:1902108	regulation of mitochondrial membrane permeability involved in apoptotic process	0	0
U	1772	GO:1902105	regulation of leukocyte differentiation	0	0
U	1773	GO:1901991	negative regulation of mitotic cell cycle phase transition	0	0
U	1774	GO:1901990	regulation of mitotic cell cycle phase transition	0	0
U	1775	GO:1901988	negative regulation of cell cycle phase transition	0	0
U	1776	GO:1901987	regulation of cell cycle phase transition	0	0
U	1777	GO:1901800	positive regulation of proteasomal protein catabolic process	0	0
U	1778	GO:1901796	regulation of signal transduction by p53 class mediator	0	0
U	1779	GO:1901681	sulfur compound binding	0	0
U	1780	GO:1901677	phosphate transmembrane transporter activity	0	0
U	1781	GO:1901663	quinone biosynthetic process	0	0
U	1782	GO:1901661	quinone metabolic process	0	0
U	1783	GO:1901659	glycosyl compound biosynthetic process	0	0
U	1784	GO:1901657	glycosyl compound metabolic process	0	0
U	1785	GO:1901655	cellular response to ketone	0	0
U	1786	GO:1901653	cellular response to peptide	0	0
U	1787	GO:1901607	alpha-amino acid biosynthetic process	0	0
U	1788	GO:1901605	alpha-amino acid metabolic process	0	0
U	1789	GO:1901385	regulation of voltage-gated calcium channel activity	0	0
U	1790	GO:1901381	positive regulation of potassium ion transmembrane transport	0	0
U	1791	GO:1901379	regulation of potassium ion transmembrane transport	0	0
U	1792	GO:1901361	organic cyclic compound catabolic process	0	0
U	1793	GO:1901342	regulation of vasculature development	0	0
U	1794	GO:1901292	nucleoside phosphate catabolic process	0	0
U	1795	GO:1901215	negative regulation of neuron death	0	0
U	1796	GO:1901214	regulation of neuron death	0	0
U	1797	GO:1901185	negative regulation of ERBB signaling pathway	0	0
U	1798	GO:1901184	regulation of ERBB signaling pathway	0	0
U	1799	GO:1901136	carbohydrate derivative catabolic process	0	0
U	1800	GO:1901099	negative regulation of signal transduction in absence of ligand	0	0
U	1801	GO:1901032	negative regulation of response to reactive oxygen species	0	0
U	1802	GO:1901028	regulation of mitochondrial outer membrane permeabilization involved in apoptotic signaling pathway	0	0
U	1803	GO:1901021	positive regulation of calcium ion transmembrane transporter activity	0	0
U	1804	GO:1901020	negative regulation of calcium ion transmembrane transporter activity	0	0
U	1805	GO:1901019	regulation of calcium ion transmembrane transporter activity	0	0
U	1806	GO:1900744	regulation of p38MAPK cascade	0	0
U	1807	GO:1900544	positive regulation of purine nucleotide metabolic process	0	0
U	1808	GO:1900543	negative regulation of purine nucleotide metabolic process	0	0
U	1809	GO:1900409	positive regulation of cellular response to oxidative stress	0	0
U	1810	GO:1900408	negative regulation of cellular response to oxidative stress	0	0
U	1811	GO:1900373	positive regulation of purine nucleotide biosynthetic process	0	0
U	1812	GO:1900371	regulation of purine nucleotide biosynthetic process	0	0
U	1813	GO:1900182	positive regulation of protein localization to nucleus	0	0
U	1814	GO:1900181	negative regulation of protein localization to nucleus	0	0
U	1815	GO:1900119	positive regulation of execution phase of apoptosis	0	0
U	1816	GO:1900117	regulation of execution phase of apoptosis	0	0
U	1817	GO:1900026	positive regulation of substrate adhesion-dependent cell spreading	0	0
U	1818	GO:1900024	regulation of substrate adhesion-dependent cell spreading	0	0
U	1819	GO:0101005	ubiquitinyl hydrolase activity	0	0
U	1820	GO:0099643	signal release from synapse	0	0
U	1821	GO:0099587	inorganic ion import into cell	0	0
U	1822	GO:0099568	cytoplasmic region	0	0
U	1823	GO:0099531	presynaptic process involved in chemical synaptic transmission	0	0
U	1824	GO:0099501	exocytic vesicle membrane	0	0
U	1825	GO:0099111	microtubule-based transport	0	0
U	1826	GO:0099106	ion channel regulator activity	0	0
U	1827	GO:0099094	ligand-gated cation channel activity	0	0
U	1828	GO:0099003	vesicle-mediated transport in synapse	0	0
U	1829	GO:0098862	cluster of actin-based cell projections	0	0
U	1830	GO:0098857	membrane microdomain	0	0
U	1831	GO:0098827	endoplasmic reticulum subcompartment	0	0
U	1832	GO:0098813	nuclear chromosome segregation	0	0
U	1833	GO:0098802	plasma membrane receptor complex	0	0
U	1834	GO:0098801	regulation of renal system process	0	0
U	1835	GO:0098797	plasma membrane protein complex	0	0
U	1836	GO:0098742	cell-cell adhesion via plasma-membrane adhesion molecules	0	0
U	1837	GO:0098661	inorganic anion transmembrane transport	0	0
U	1838	GO:0098659	inorganic cation import into cell	0	0
U	1839	GO:0098657	import into cell	0	0
U	1840	GO:0098602	single organism cell adhesion	0	0
U	1841	GO:0097756	negative regulation of blood vessel diameter	0	0
U	1842	GO:0097755	positive regulation of blood vessel diameter	0	0
U	1843	GO:0097746	regulation of blood vessel diameter	0	0
U	1844	GO:0097711	ciliary basal body docking	0	0
U	1845	GO:0097530	granulocyte migration	0	0
U	1846	GO:0097517	contractile actin filament bundle	0	0
U	1847	GO:0097493	structural molecule activity conferring elasticity	0	0
U	1848	GO:0097485	neuron projection guidance	0	0
U	1849	GO:0097480	establishment of synaptic vesicle localization	0	0
U	1850	GO:0097479	synaptic vesicle localization	0	0
U	1851	GO:0097440	apical dendrite	0	0
U	1852	GO:0097306	cellular response to alcohol	0	0
U	1853	GO:0097300	programmed necrotic cell death	0	0
U	1854	GO:0097286	iron ion import	0	0
U	1855	GO:0097284	hepatocyte apoptotic process	0	0
U	1856	GO:0097228	sperm principal piece	0	0
U	1857	GO:0097223	sperm part	0	0
U	1858	GO:0097164	ammonium ion metabolic process	0	0
U	1859	GO:0097110	scaffold protein binding	0	0
U	1860	GO:0097067	cellular response to thyroid hormone stimulus	0	0
U	1861	GO:0097066	response to thyroid hormone	0	0
U	1862	GO:0097060	synaptic membrane	0	0
U	1863	GO:0097028	dendritic cell differentiation	0	0
U	1864	GO:0090596	sensory organ morphogenesis	0	0
U	1865	GO:0090316	positive regulation of intracellular protein transport	0	0
U	1866	GO:0090307	mitotic spindle assembly	0	0
U	1867	GO:0090287	regulation of cellular response to growth factor stimulus	0	0
U	1868	GO:0090281	negative regulation of calcium ion import	0	0
U	1869	GO:0090278	negative regulation of peptide hormone secretion	0	0
U	1870	GO:0090201	negative regulation of release of cytochrome c from mitochondria	0	0
U	1871	GO:0090179	planar cell polarity pathway involved in neural tube closure	0	0
U	1872	GO:0090178	regulation of establishment of planar polarity involved in neural tube closure	0	0
U	1873	GO:0090175	regulation of establishment of planar polarity	0	0
U	1874	GO:0090174	organelle membrane fusion	0	0
U	1875	GO:0090151	establishment of protein localization to mitochondrial membrane	0	0
U	1876	GO:0090141	positive regulation of mitochondrial fission	0	0
U	1877	GO:0090103	cochlea morphogenesis	0	0
U	1878	GO:0090100	positive regulation of transmembrane receptor protein serine/threonine kinase signaling pathway	0	0
U	1879	GO:0090092	regulation of transmembrane receptor protein serine/threonine kinase signaling pathway	0	0
U	1880	GO:0090090	negative regulation of canonical Wnt signaling pathway	0	0
U	1881	GO:0090066	regulation of anatomical structure size	0	0
U	1882	GO:0086004	regulation of cardiac muscle cell contraction	0	0
U	1883	GO:0080025	phosphatidylinositol-3,5-bisphosphate binding	0	0
U	1884	GO:0072666	establishment of protein localization to vacuole	0	0
U	1885	GO:0072665	protein localization to vacuole	0	0
U	1886	GO:0072562	blood microparticle	0	0
U	1887	GO:0072523	purine-containing compound catabolic process	0	0
U	1888	GO:0072512	trivalent inorganic cation transport	0	0
U	1889	GO:0072511	divalent inorganic cation transport	0	0
U	1890	GO:0072509	divalent inorganic cation transmembrane transporter activity	0	0
U	1891	GO:0072431	signal transduction involved in mitotic G1 DNA damage checkpoint	0	0
U	1892	GO:0072422	signal transduction involved in DNA damage checkpoint	0	0
U	1893	GO:0072413	signal transduction involved in mitotic cell cycle checkpoint	0	0
U	1894	GO:0072401	signal transduction involved in DNA integrity checkpoint	0	0
U	1895	GO:0072384	organelle transport along microtubule	0	0
U	1896	GO:0072341	modified amino acid binding	0	0
U	1897	GO:0072332	intrinsic apoptotic signaling pathway by p53 class mediator	0	0
U	1898	GO:0072330	monocarboxylic acid biosynthetic process	0	0
U	1899	GO:0072329	monocarboxylic acid catabolic process	0	0
U	1900	GO:0072091	regulation of stem cell proliferation	0	0
U	1901	GO:0071901	negative regulation of protein serine/threonine kinase activity	0	0
U	1902	GO:0071887	leukocyte apoptotic process	0	0
U	1903	GO:0071880	adenylate cyclase-activating adrenergic receptor signaling pathway	0	0
U	1904	GO:0071875	adrenergic receptor signaling pathway	0	0
U	1905	GO:0071872	cellular response to epinephrine stimulus	0	0
U	1906	GO:0071870	cellular response to catecholamine stimulus	0	0
U	1907	GO:0071868	cellular response to monoamine stimulus	0	0
U	1908	GO:0071824	protein-DNA complex subunit organization	0	0
U	1909	GO:0071814	protein-lipid complex binding	0	0
U	1910	GO:0071813	lipoprotein particle binding	0	0
U	1911	GO:0071806	protein transmembrane transport	0	0
U	1912	GO:0071786	endoplasmic reticulum tubular network organization	0	0
U	1913	GO:0071782	endoplasmic reticulum tubular network	0	0
U	1914	GO:0071711	basement membrane organization	0	0
U	1915	GO:0071682	endocytic vesicle lumen	0	0
U	1916	GO:0071674	mononuclear cell migration	0	0
U	1917	GO:0071621	granulocyte chemotaxis	0	0
U	1918	GO:0071549	cellular response to dexamethasone stimulus	0	0
U	1919	GO:0071548	response to dexamethasone	0	0
U	1920	GO:0071514	genetic imprinting	0	0
U	1921	GO:0071478	cellular response to radiation	0	0
U	1922	GO:0071398	cellular response to fatty acid	0	0
U	1923	GO:0071397	cellular response to cholesterol	0	0
U	1924	GO:0071392	cellular response to estradiol stimulus	0	0
U	1925	GO:0071385	cellular response to glucocorticoid stimulus	0	0
U	1926	GO:0071384	cellular response to corticosteroid stimulus	0	0
U	1927	GO:0071383	cellular response to steroid hormone stimulus	0	0
U	1928	GO:0071377	cellular response to glucagon stimulus	0	0
U	1929	GO:0071375	cellular response to peptide hormone stimulus	0	0
U	1930	GO:0071364	cellular response to epidermal growth factor stimulus	0	0
U	1931	GO:0071354	cellular response to interleukin-6	0	0
U	1932	GO:0071320	cellular response to cAMP	0	0
U	1933	GO:0071312	cellular response to alkaloid	0	0
U	1934	GO:0071295	cellular response to vitamin	0	0
U	1935	GO:0071277	cellular response to calcium ion	0	0
U	1936	GO:0071260	cellular response to mechanical stimulus	0	0
U	1937	GO:0071243	cellular response to arsenic-containing substance	0	0
U	1938	GO:0071222	cellular response to lipopolysaccharide	0	0
U	1939	GO:0071216	cellular response to biotic stimulus	0	0
U	1940	GO:0071214	cellular response to abiotic stimulus	0	0
U	1941	GO:0071158	positive regulation of cell cycle arrest	0	0
U	1942	GO:0071156	regulation of cell cycle arrest	0	0
U	1943	GO:0070884	regulation of calcineurin-NFAT signaling cascade	0	0
U	1944	GO:0070875	positive regulation of glycogen metabolic process	0	0
U	1945	GO:0070849	response to epidermal growth factor	0	0
U	1946	GO:0070838	divalent metal ion transport	0	0
U	1947	GO:0070828	heterochromatin organization	0	0
U	1948	GO:0070741	response to interleukin-6	0	0
U	1949	GO:0070723	response to cholesterol	0	0
U	1950	GO:0070664	negative regulation of leukocyte proliferation	0	0
U	1951	GO:0070661	leukocyte proliferation	0	0
U	1952	GO:0070646	protein modification by small protein removal	0	0
U	1953	GO:0070588	calcium ion transmembrane transport	0	0
U	1954	GO:0070584	mitochondrion morphogenesis	0	0
U	1955	GO:0070509	calcium ion import	0	0
U	1956	GO:0070507	regulation of microtubule cytoskeleton organization	0	0
U	1957	GO:0070491	repressing transcription factor binding	0	0
U	1958	GO:0070371	ERK1 and ERK2 cascade	0	0
U	1959	GO:0070306	lens fiber cell differentiation	0	0
U	1960	GO:0070304	positive regulation of stress-activated protein kinase signaling cascade	0	0
U	1961	GO:0070303	negative regulation of stress-activated protein kinase signaling cascade	0	0
U	1962	GO:0070300	phosphatidic acid binding	0	0
U	1963	GO:0070279	vitamin B6 binding	0	0
U	1964	GO:0070266	necroptotic process	0	0
U	1965	GO:0070265	necrotic cell death	0	0
U	1966	GO:0070231	T cell apoptotic process	0	0
U	1967	GO:0070227	lymphocyte apoptotic process	0	0
U	1968	GO:0070189	kynurenine metabolic process	0	0
U	1969	GO:0070129	regulation of mitochondrial translation	0	0
U	1970	GO:0065004	protein-DNA complex assembly	0	0
U	1971	GO:0065002	intracellular protein transmembrane transport	0	0
U	1972	GO:0061726	mitochondrion disassembly	0	0
U	1973	GO:0061659	ubiquitin-like protein ligase activity	0	0
U	1974	GO:0061630	ubiquitin protein ligase activity	0	0
U	1975	GO:0061333	renal tubule morphogenesis	0	0
U	1976	GO:0061311	cell surface receptor signaling pathway involved in heart development	0	0
U	1977	GO:0061245	establishment or maintenance of bipolar cell polarity	0	0
U	1978	GO:0061154	endothelial tube morphogenesis	0	0
U	1979	GO:0061136	regulation of proteasomal protein catabolic process	0	0
U	1980	GO:0061098	positive regulation of protein tyrosine kinase activity	0	0
U	1981	GO:0061097	regulation of protein tyrosine kinase activity	0	0
U	1982	GO:0061061	muscle structure development	0	0
U	1983	GO:0061053	somite development	0	0
U	1984	GO:0061050	regulation of cell growth involved in cardiac muscle cell development	0	0
U	1985	GO:0061029	eyelid development in camera-type eye	0	0
U	1986	GO:0061028	establishment of endothelial barrier	0	0
U	1987	GO:0061005	cell differentiation involved in kidney development	0	0
U	1988	GO:0061003	positive regulation of dendritic spine morphogenesis	0	0
U	1989	GO:0061001	regulation of dendritic spine morphogenesis	0	0
U	1990	GO:0060768	regulation of epithelial cell proliferation involved in prostate gland development	0	0
U	1991	GO:0060632	regulation of microtubule-based movement	0	0
U	1992	GO:0060627	regulation of vesicle-mediated transport	0	0
U	1993	GO:0060612	adipose tissue development	0	0
U	1994	GO:0060606	tube closure	0	0
U	1995	GO:0060600	dichotomous subdivision of an epithelial terminal unit	0	0
U	1996	GO:0060590	ATPase regulator activity	0	0
U	1997	GO:0060491	regulation of cell projection assembly	0	0
U	1998	GO:0060444	branching involved in mammary gland duct morphogenesis	0	0
[truncated: 1,232 more rows]

## Sheet: BrainOver
Table S21. Random Forest results ranking GO terms by their ability to predict a gene being classified as overexpressed in the brain analysis.
Expression	Rank	GO ID	GO term	Probability	Precision
O	1	GO:2001198	regulation of dendritic cell differentiation	0.2978	1.087
O	2	GO:0006958	complement activation, classical pathway	0.1352	2.2667
O	3	GO:0071803	positive regulation of podosome assembly	0.1278	0.6
O	4	GO:1902106	negative regulation of leukocyte differentiation	0.1177	2.3448
O	5	GO:0032570	response to progesterone	0.1089	0.6923
O	6	GO:0071801	regulation of podosome assembly	0.0929	0.5455
O	7	GO:0006956	complement activation	0.0921	2.2759
O	8	GO:0044319	wound healing, spreading of cells	0.0864	0.5625
O	9	GO:1903707	negative regulation of hemopoiesis	0.0814	2.1429
O	10	GO:0072376	protein activation cascade	0.0781	2.6154
O	11	GO:0004859	phospholipase inhibitor activity	0.0744	0.5833
O	12	GO:0060333	interferon-gamma-mediated signaling pathway	0.0737	0.7727
O	13	GO:0043202	lysosomal lumen	0.0706	3.8846
O	14	GO:0006911	phagocytosis, engulfment	0.0678	0.875
O	15	GO:0022617	extracellular matrix disassembly	0.0667	1.2
O	16	GO:0001562	response to protozoan	0.0667	0.4286
O	17	GO:1901741	positive regulation of myoblast fusion	0.0667	0.25
O	18	GO:0051604	protein maturation	0.0662	1.7692
O	19	GO:0030194	positive regulation of blood coagulation	0.0653	0.8333
O	20	GO:0099024	plasma membrane invagination	0.063	0.6429
O	21	GO:0055102	lipase inhibitor activity	0.0622	0.5833
O	22	GO:0042119	neutrophil activation	0.062	37.6333
O	23	GO:0002283	neutrophil activation involved in immune response	0.0619	35
O	24	GO:0016064	immunoglobulin mediated immune response	0.0611	0.2143
O	25	GO:0036230	granulocyte activation	0.0608	38.0333
O	26	GO:0005518	collagen binding	0.0605	1
O	27	GO:0002274	myeloid leukocyte activation	0.0597	47.1333
O	28	GO:0030866	cortical actin cytoskeleton organization	0.0597	0.3333
O	29	GO:0002275	myeloid cell activation involved in immune response	0.0592	33.4333
O	30	GO:0042832	defense response to protozoan	0.0583	0.3571
O	31	GO:0017171	serine hydrolase activity	0.0581	2.76
O	32	GO:0043299	leukocyte degranulation	0.058	30.4
O	33	GO:0043312	neutrophil degranulation	0.057	32.6552
O	34	GO:0002366	leukocyte activation involved in immune response	0.0562	46.0667
O	35	GO:1902105	regulation of leukocyte differentiation	0.056	4.8333
O	36	GO:0007229	integrin-mediated signaling pathway	0.0559	0.8824
O	37	GO:0002263	cell activation involved in immune response	0.0556	41.5
O	38	GO:1904724	tertiary granule lumen	0.0555	0.6667
O	39	GO:0030149	sphingolipid catabolic process	0.0549	0.4167
O	40	GO:0045055	regulated exocytosis	0.0546	59.4
O	41	GO:0000323	lytic vacuole	0.0546	9.3333
O	42	GO:0016903	oxidoreductase activity, acting on the aldehyde or oxo group of donors	0.0543	0.72
O	43	GO:0004252	serine-type endopeptidase activity	0.0526	3.5172
O	44	GO:0006887	exocytosis	0.0511	67.2333
O	45	GO:1902117	positive regulation of organelle assembly	0.0501	1.2632
O	46	GO:0006959	humoral immune response	0.0496	4.4138
O	47	GO:0002252	immune effector process	0.0493	80.6333
O	48	GO:0072562	blood microparticle	0.0493	2.4444
O	49	GO:0005773	vacuole	0.0492	16.5667
O	50	GO:0061572	actin filament bundle organization	0.0491	0.6
O	51	GO:0002694	regulation of leukocyte activation	0.049	1.4444
O	52	GO:0001885	endothelial cell development	0.0487	0.4545
O	53	GO:0045321	leukocyte activation	0.0486	43.4333
O	54	GO:0031529	ruffle organization	0.0483	0.5
O	55	GO:0004364	glutathione transferase activity	0.0482	0.5833
O	56	GO:0043030	regulation of macrophage activation	0.0472	0.5714
O	57	GO:0060341	regulation of cellular localization	0.047	3.1364
O	58	GO:0032642	regulation of chemokine production	0.0467	1.4737
O	59	GO:0005775	vacuolar lumen	0.0464	5.4
O	60	GO:0006910	phagocytosis, recognition	0.0458	0.3
O	61	GO:0005581	collagen trimer	0.0456	0.963
O	62	GO:0010831	positive regulation of myotube differentiation	0.0456	0.375
O	63	GO:0001848	complement binding	0.0456	0.3333
O	64	GO:0005764	lysosome	0.0453	9.1667
O	65	GO:0032432	actin filament bundle	0.0453	0.5
O	66	GO:0044058	regulation of digestive system process	0.045	0.4444
O	67	GO:0017081	chloride channel regulator activity	0.045	0.4167
O	68	GO:1903827	regulation of cellular protein localization	0.0449	1.7619
O	69	GO:0060205	cytoplasmic vesicle lumen	0.0447	7.3846
O	70	GO:0051639	actin filament network formation	0.0444	0.3333
O	71	GO:0032682	negative regulation of chemokine production	0.0444	0.25
O	72	GO:0002244	hematopoietic progenitor cell differentiation	0.0432	0.7037
O	73	GO:0001775	cell activation	0.0423	53.2
O	74	GO:0034774	secretory granule lumen	0.0419	7.2
O	75	GO:1900048	positive regulation of hemostasis	0.0418	0.5556
O	76	GO:0010575	positive regulation of vascular endothelial growth factor production	0.0417	0.3333
O	77	GO:2000249	regulation of actin cytoskeleton reorganization	0.0417	0.1667
O	78	GO:0045087	innate immune response	0.0415	9.3
O	79	GO:0051017	actin filament bundle assembly	0.0414	0.5625
O	80	GO:0002830	positive regulation of type 2 immune response	0.0409	0.5455
O	81	GO:0002820	negative regulation of adaptive immune response	0.04	0.2222
O	82	GO:0097529	myeloid leukocyte migration	0.0398	0.8
O	83	GO:0032940	secretion by cell	0.0396	46.9
O	84	GO:1901576	organic substance biosynthetic process	0.0394	5.037
O	85	GO:0046903	secretion	0.0389	48.2333
O	86	GO:0043295	glutathione binding	0.0389	0.5
O	87	GO:0016485	protein processing	0.0387	1.7895
O	88	GO:0051147	regulation of muscle cell differentiation	0.0381	0.3636
O	89	GO:0030667	secretory granule membrane	0.038	6.1111
O	90	GO:0050778	positive regulation of immune response	0.0378	17.1
O	91	GO:0031983	vesicle lumen	0.0378	6.0741
O	92	GO:0008236	serine-type peptidase activity	0.0376	3.2333
O	93	GO:0003254	regulation of membrane depolarization	0.0375	0.4
O	94	GO:0002253	activation of immune response	0.0372	9.1034
O	95	GO:0002504	antigen processing and presentation of peptide or polysaccharide antigen via MHC class II	0.0371	0.5
O	96	GO:0005765	lysosomal membrane	0.037	6.2
O	97	GO:0035578	azurophil granule lumen	0.0369	2.25
O	98	GO:0044437	vacuolar part	0.0363	23
O	99	GO:0032930	positive regulation of superoxide anion generation	0.0361	0.6
O	100	GO:0007597	blood coagulation, intrinsic pathway	0.0361	0.4444
O	101	GO:0001817	regulation of cytokine production	0.0359	10.8276
O	102	GO:0046326	positive regulation of glucose import	0.0358	0.2857
O	103	GO:0007033	vacuole organization	0.0352	0.4
O	104	GO:1903706	regulation of hemopoiesis	0.0347	3.7241
O	105	GO:0048306	calcium-dependent protein binding	0.0347	0.4375
O	106	GO:0002576	platelet degranulation	0.0342	2.5882
O	107	GO:0055098	response to low-density lipoprotein particle	0.0333	0.5
O	108	GO:0090196	regulation of chemokine secretion	0.0333	0.4
O	109	GO:0001530	lipopolysaccharide binding	0.0333	0.3333
O	110	GO:0090322	regulation of superoxide metabolic process	0.0333	0.25
O	111	GO:0002003	angiotensin maturation	0.0333	0.25
O	112	GO:0060142	regulation of syncytium formation by plasma membrane fusion	0.0333	0.2
O	113	GO:0071637	regulation of monocyte chemotactic protein-1 production	0.0333	0.1429
O	114	GO:0002761	regulation of myeloid leukocyte differentiation	0.0328	0.5
O	115	GO:0008361	regulation of cell size	0.0319	0.5769
O	116	GO:0098797	plasma membrane protein complex	0.0317	1.68
O	117	GO:0001819	positive regulation of cytokine production	0.031	2.963
O	118	GO:0010324	membrane invagination	0.0308	0.6667
O	119	GO:0050776	regulation of immune response	0.0307	20.5333
O	120	GO:0002683	negative regulation of immune system process	0.0307	6
O	121	GO:0044433	cytoplasmic vesicle part	0.0301	47.8667
O	122	GO:1901565	organonitrogen compound catabolic process	0.0299	5.2414
O	123	GO:0002478	antigen processing and presentation of exogenous peptide antigen	0.0299	1.8261
O	124	GO:0035577	azurophil granule membrane	0.0297	0.7333
O	125	GO:0030659	cytoplasmic vesicle membrane	0.0294	6.84
O	126	GO:0004175	endopeptidase activity	0.0291	3.5
O	127	GO:0002376	immune system process	0.029	74.4
O	128	GO:0070374	positive regulation of ERK1 and ERK2 cascade	0.029	0.75
O	129	GO:0009607	response to biotic stimulus	0.0286	9.7308
O	130	GO:0098852	lytic vacuole membrane	0.0279	5.6
O	131	GO:0019886	antigen processing and presentation of exogenous peptide antigen via MHC class II	0.0279	0.7647
O	132	GO:2000379	positive regulation of reactive oxygen species metabolic process	0.0278	1.3636
O	133	GO:0004601	peroxidase activity	0.0278	0.4
O	134	GO:0042116	macrophage activation	0.0278	0.375
O	135	GO:0033002	muscle cell proliferation	0.0278	0.3333
O	136	GO:0045596	negative regulation of cell differentiation	0.0276	7.2667
O	137	GO:0007417	central nervous system development	0.0276	0.76
O	138	GO:0016192	vesicle-mediated transport	0.0272	70.1
O	139	GO:0005774	vacuolar membrane	0.0271	6.8966
O	140	GO:0031347	regulation of defense response	0.0271	5.8
O	141	GO:0098602	single organism cell adhesion	0.0271	2.4231
O	142	GO:0007568	aging	0.0266	2.3478
O	143	GO:0036152	phosphatidylethanolamine acyl-chain remodeling	0.0264	0.5417
O	144	GO:0016684	oxidoreductase activity, acting on peroxide as acceptor	0.0263	0.5
O	145	GO:0051050	positive regulation of transport	0.0261	7.7692
O	146	GO:0080171	lytic vacuole organization	0.0261	0.4545
O	147	GO:0071496	cellular response to external stimulus	0.026	2.5714
O	148	GO:0045670	regulation of osteoclast differentiation	0.026	0.2941
O	149	GO:0032101	regulation of response to external stimulus	0.0259	3.9583
O	150	GO:0045766	positive regulation of angiogenesis	0.0259	1.1667
O	151	GO:0071310	cellular response to organic substance	0.0257	11.5333
O	152	GO:0022603	regulation of anatomical structure morphogenesis	0.0257	4.3125
O	153	GO:0012507	ER to Golgi transport vesicle membrane	0.0256	0.8667
O	154	GO:0006952	defense response	0.0255	19.6207
O	155	GO:0051241	negative regulation of multicellular organismal process	0.0253	22.2333
O	156	GO:0002684	positive regulation of immune system process	0.0253	22.0345
O	157	GO:0004629	phospholipase C activity	0.0252	0.25
O	158	GO:0016337	single organismal cell-cell adhesion	0.0251	2.56
O	159	GO:0048002	antigen processing and presentation of peptide antigen	0.025	1.8333
O	160	GO:0030212	hyaluronan metabolic process	0.025	0.2857
O	161	GO:0070207	protein homotrimerization	0.025	0.25
O	162	GO:0016540	protein autoprocessing	0.025	0.1667
O	163	GO:0019372	lipoxygenase pathway	0.0249	0.24
O	164	GO:0031974	membrane-enclosed lumen	0.0248	26.1
O	165	GO:0048770	pigment granule	0.0248	1.0714
O	166	GO:0030335	positive regulation of cell migration	0.0247	3.1667
O	167	GO:0002682	regulation of immune system process	0.0246	37.2667
O	168	GO:0051093	negative regulation of developmental process	0.0246	9.8333
O	169	GO:0043230	extracellular organelle	0.0244	184.633
O	170	GO:0070887	cellular response to chemical stimulus	0.0244	18.6333
O	171	GO:0006026	aminoglycan catabolic process	0.0244	1.1538
O	172	GO:0005913	cell-cell adherens junction	0.0244	0.5
O	173	GO:0097300	programmed necrotic cell death	0.0244	0.4286
O	174	GO:0050839	cell adhesion molecule binding	0.0243	5.25
O	175	GO:1903561	extracellular vesicle	0.0242	197.4
O	176	GO:0070062	extracellular exosome	0.0241	185.367
O	177	GO:0098805	whole membrane	0.0241	33.6333
O	178	GO:0043207	response to external biotic stimulus	0.0241	8
O	179	GO:0005200	structural constituent of cytoskeleton	0.0241	1.2632
O	180	GO:0046470	phosphatidylcholine metabolic process	0.0241	0.931
O	181	GO:0019884	antigen processing and presentation of exogenous antigen	0.024	1.3333
O	182	GO:0071216	cellular response to biotic stimulus	0.024	1.0909
O	183	GO:0012506	vesicle membrane	0.0239	7.9615
O	184	GO:0098552	side of membrane	0.0239	2.6071
O	185	GO:0048545	response to steroid hormone	0.0236	2.2667
O	186	GO:0032496	response to lipopolysaccharide	0.0234	2.65
O	187	GO:0070013	intracellular organelle lumen	0.0231	24.6667
O	188	GO:0030055	cell-substrate junction	0.0231	3.1034
O	189	GO:0050820	positive regulation of coagulation	0.0231	0.4286
O	190	GO:0043233	organelle lumen	0.0229	27
O	191	GO:0009605	response to external stimulus	0.0229	19.8333
O	192	GO:0050818	regulation of coagulation	0.0229	1
O	193	GO:1904950	negative regulation of establishment of protein localization	0.0227	1.2917
O	194	GO:0033993	response to lipid	0.0226	6.2222
O	195	GO:0090066	regulation of anatomical structure size	0.0226	2.3103
O	196	GO:1904813	ficolin-1-rich granule lumen	0.0226	1.625
O	197	GO:0101003	ficolin-1-rich granule membrane	0.0226	1
O	198	GO:0051270	regulation of cellular component movement	0.0224	4.24
O	199	GO:0045296	cadherin binding	0.0224	2.2759
O	200	GO:0005539	glycosaminoglycan binding	0.0224	0.8621
O	201	GO:0070161	anchoring junction	0.0223	3.9259
O	202	GO:0002237	response to molecule of bacterial origin	0.0223	2.7391
O	203	GO:0009636	response to toxic substance	0.0222	1
O	204	GO:0001846	opsonin binding	0.0222	0.2222
O	205	GO:0001891	phagocytic cup	0.0222	0.1818
O	206	GO:0044765	single-organism transport	0.0221	85.2333
O	207	GO:0030198	extracellular matrix organization	0.0221	2.3704
O	208	GO:0051239	regulation of multicellular organismal process	0.022	87.4667
O	209	GO:0051128	regulation of cellular component organization	0.022	27.8
O	210	GO:0006955	immune response	0.0219	16.1481
O	211	GO:0044092	negative regulation of molecular function	0.0219	6.0714
O	212	GO:0035579	specific granule membrane	0.0218	0.75
O	213	GO:0034284	response to monosaccharide	0.0217	1.1111
O	214	GO:0042221	response to chemical	0.0216	50.6667
O	215	GO:0005576	extracellular region	0.0216	33.0333
O	216	GO:0006022	aminoglycan metabolic process	0.0216	1.5
O	217	GO:0010033	response to organic substance	0.0215	23.3333
O	218	GO:0051272	positive regulation of cellular component movement	0.0215	3.3889
O	219	GO:0002822	regulation of adaptive immune response based on somatic recombination of immune receptors built from immunoglobulin superfamily domains	0.0214	1.6
O	220	GO:0008144	drug binding	0.0214	0.2
O	221	GO:0016323	basolateral plasma membrane	0.0213	1.1111
O	222	GO:1904018	positive regulation of vasculature development	0.0213	0.75
O	223	GO:0050793	regulation of developmental process	0.0212	50.2
O	224	GO:0032879	regulation of localization	0.0212	36.1333
O	225	GO:0043062	extracellular structure organization	0.0212	3.1538
O	226	GO:0031093	platelet alpha granule lumen	0.0212	0.5556
O	227	GO:0031099	regeneration	0.0208	1.1875
O	228	GO:0004197	cysteine-type endopeptidase activity	0.0208	1
O	229	GO:0044421	extracellular region part	0.0207	161
O	230	GO:0048584	positive regulation of response to stimulus	0.0206	30.2333
O	231	GO:0005924	cell-substrate adherens junction	0.0206	2.6786
O	232	GO:0045576	mast cell activation	0.0206	0.375
O	233	GO:2000026	regulation of multicellular organismal development	0.0205	29.1333
O	234	GO:0042383	sarcolemma	0.0205	0.5
O	235	GO:0070821	tertiary granule membrane	0.0204	0.6842
O	236	GO:0031982	vesicle	0.0202	171.867
O	237	GO:1902578	single-organism localization	0.0202	81.8667
O	238	GO:0010828	positive regulation of glucose transport	0.0202	0.4615
O	239	GO:0051240	positive regulation of multicellular organismal process	0.02	8.6552
O	240	GO:0070201	regulation of establishment of protein localization	0.02	3.5217
O	241	GO:0006909	phagocytosis	0.0199	0.45
O	242	GO:0005856	cytoskeleton	0.0198	7.7931
O	243	GO:0046324	regulation of glucose import	0.0198	0.6667
O	244	GO:0007272	ensheathment of neurons	0.0198	0.3636
O	245	GO:0006631	fatty acid metabolic process	0.0197	1.32
O	246	GO:0002474	antigen processing and presentation of peptide antigen via MHC class I	0.0197	0.5714
O	247	GO:0044702	single organism reproductive process	0.0196	1.1667
O	248	GO:0002695	negative regulation of leukocyte activation	0.0196	0.6667
O	249	GO:0045637	regulation of myeloid cell differentiation	0.0196	0.625
O	250	GO:0032722	positive regulation of chemokine production	0.0196	0.5385
O	251	GO:0010038	response to metal ion	0.0195	1.7391
O	252	GO:0001948	glycoprotein binding	0.0195	0.6667
O	253	GO:0055038	recycling endosome membrane	0.0195	0.375
O	254	GO:2000404	regulation of T cell migration	0.0194	0.25
O	255	GO:0045595	regulation of cell differentiation	0.0193	24.5333
O	256	GO:0009991	response to extracellular stimulus	0.0193	2.7619
O	257	GO:0051051	negative regulation of transport	0.0193	2.1905
O	258	GO:1901342	regulation of vasculature development	0.0193	1.2857
O	259	GO:0032103	positive regulation of response to external stimulus	0.0192	1.4118
O	260	GO:0046649	lymphocyte activation	0.0192	1.4091
O	261	GO:0009743	response to carbohydrate	0.0192	1.0625
O	262	GO:0005925	focal adhesion	0.0191	2.6071
O	263	GO:0005912	adherens junction	0.019	3.6538
O	264	GO:0006954	inflammatory response	0.019	2.5217
O	265	GO:0051049	regulation of transport	0.0189	23
O	266	GO:0031102	neuron projection regeneration	0.0189	0.375
O	267	GO:0048145	regulation of fibroblast proliferation	0.0187	0.5
O	268	GO:0098588	bounding membrane of organelle	0.0186	30.0667
O	269	GO:1901606	alpha-amino acid catabolic process	0.0186	1.25
O	270	GO:0030154	cell differentiation	0.0185	22.6667
O	271	GO:1903317	regulation of protein maturation	0.0183	0.2727
O	272	GO:0009986	cell surface	0.0182	3.7727
O	273	GO:1902115	regulation of organelle assembly	0.0182	0.7
O	274	GO:0014070	response to organic cyclic compound	0.0181	4.7857
O	275	GO:0010631	epithelial cell migration	0.0181	0.1818
O	276	GO:0032403	protein complex binding	0.018	8.1481
O	277	GO:0031226	intrinsic component of plasma membrane	0.0179	29.4667
O	278	GO:0051130	positive regulation of cellular component organization	0.0179	5.0741
O	279	GO:0006950	response to stress	0.0178	46.6333
O	280	GO:0001774	microglial cell activation	0.0178	0.25
O	281	GO:0016829	lyase activity	0.0177	0.8824
O	282	GO:0051716	cellular response to stimulus	0.0176	32.4138
O	283	GO:0042579	microbody	0.0176	0.6154
O	284	GO:0001649	osteoblast differentiation	0.0176	0.2632
O	285	GO:0042127	regulation of cell proliferation	0.0175	14.1724
O	286	GO:0008285	negative regulation of cell proliferation	0.0175	2.8929
O	287	GO:0051048	negative regulation of secretion	0.0175	1.6842
O	288	GO:0007166	cell surface receptor signaling pathway	0.0174	33.0667
O	289	GO:0040012	regulation of locomotion	0.0174	3.9565
O	290	GO:1900046	regulation of hemostasis	0.0174	0.4
O	291	GO:0048513	animal organ development	0.0173	4.0909
O	292	GO:0019222	regulation of metabolic process	0.0172	18.3448
O	293	GO:0007155	cell adhesion	0.0172	10.6
O	294	GO:0008233	peptidase activity	0.0172	5
O	295	GO:0008217	regulation of blood pressure	0.0172	0.7143
O	296	GO:0032720	negative regulation of tumor necrosis factor production	0.0172	0.3
O	297	GO:0044712	single-organism catabolic process	0.0171	14.2667
O	298	GO:2000147	positive regulation of cell motility	0.0171	3.3684
O	299	GO:0051047	positive regulation of secretion	0.0171	0.6875
O	300	GO:0006928	movement of cell or subcellular component	0.017	4.3448
O	301	GO:0002764	immune response-regulating signaling pathway	0.017	2.9167
O	302	GO:0040017	positive regulation of locomotion	0.0169	2.7619
O	303	GO:0070011	peptidase activity, acting on L-amino acid peptides	0.0167	5.3793
O	304	GO:0032535	regulation of cellular component size	0.0167	1.4483
O	305	GO:0043005	neuron projection	0.0167	1.2917
O	306	GO:0071402	cellular response to lipoprotein particle stimulus	0.0167	1
O	307	GO:0002720	positive regulation of cytokine production involved in immune response	0.0167	1
O	308	GO:0001990	regulation of systemic arterial blood pressure by hormone	0.0167	1
O	309	GO:0002864	regulation of acute inflammatory response to antigenic stimulus	0.0167	0.5
O	310	GO:0071346	cellular response to interferon-gamma	0.0167	0.3333
O	311	GO:0045581	negative regulation of T cell differentiation	0.0167	0.3333
O	312	GO:0071404	cellular response to low-density lipoprotein particle stimulus	0.0167	0.25
O	313	GO:0003044	regulation of systemic arterial blood pressure mediated by a chemical signal	0.0167	0.25
O	314	GO:2000425	regulation of apoptotic cell clearance	0.0167	0.2
O	315	GO:0051153	regulation of striated muscle cell differentiation	0.0167	0.2
O	316	GO:0048147	negative regulation of fibroblast proliferation	0.0167	0.1111
O	317	GO:0023023	MHC protein complex binding	0.0167	0.1111
O	318	GO:0050727	regulation of inflammatory response	0.0166	1.8
O	319	GO:1903510	mucopolysaccharide metabolic process	0.0166	0.7143
O	320	GO:0006664	glycolipid metabolic process	0.0166	0.3333
O	321	GO:1901564	organonitrogen compound metabolic process	0.0165	26.3333
O	322	GO:0019221	cytokine-mediated signaling pathway	0.0165	3.1429
O	323	GO:0044877	macromolecular complex binding	0.0164	8.7037
O	324	GO:0051129	negative regulation of cellular component organization	0.0164	2.4138
O	325	GO:1901605	alpha-amino acid metabolic process	0.0164	1.6522
O	326	GO:0042802	identical protein binding	0.0163	18.5517
O	327	GO:0003012	muscle system process	0.0163	1.2692
O	328	GO:0097164	ammonium ion metabolic process	0.0163	1.1
O	329	GO:0030203	glycosaminoglycan metabolic process	0.0163	0.9375
O	330	GO:0005884	actin filament	0.0163	0.5556
O	331	GO:0030334	regulation of cell migration	0.0162	4.5769
O	332	GO:0048870	cell motility	0.0162	2.6
O	333	GO:0005615	extracellular space	0.0161	11
O	334	GO:0042981	regulation of apoptotic process	0.0161	4.9615
O	335	GO:2000146	negative regulation of cell motility	0.0161	0.6429
O	336	GO:0022610	biological adhesion	0.016	9.3667
O	337	GO:0032757	positive regulation of interleukin-8 production	0.0159	0.5
O	338	GO:1904752	regulation of vascular associated smooth muscle cell migration	0.0159	0.4
O	339	GO:0023056	positive regulation of signaling	0.0158	6
O	340	GO:0004857	enzyme inhibitor activity	0.0158	2.5
O	341	GO:2000145	regulation of cell motility	0.0157	3.6087
O	342	GO:0016042	lipid catabolic process	0.0157	2.037
O	343	GO:0051046	regulation of secretion	0.0156	3.96
O	344	GO:1900180	regulation of protein localization to nucleus	0.0156	0.7143
O	345	GO:0001772	immunological synapse	0.0156	0.125
O	346	GO:0051234	establishment of localization	0.0155	82.2667
O	347	GO:0005887	integral component of plasma membrane	0.0155	21.8
O	348	GO:0030863	cortical cytoskeleton	0.0155	0.3571
O	349	GO:0006810	transport	0.0154	88.3667
O	350	GO:0030054	cell junction	0.0154	11.0333
O	351	GO:0008219	cell death	0.0154	5.8333
O	352	GO:0098609	cell-cell adhesion	0.0154	3.8333
O	353	GO:0002495	antigen processing and presentation of peptide antigen via MHC class II	0.0154	0.5385
O	354	GO:0044767	single-organism developmental process	0.0153	61.1667
O	355	GO:2000257	regulation of protein activation cascade	0.0153	0.5
O	356	GO:1901575	organic substance catabolic process	0.0152	14.4
O	357	GO:0090087	regulation of peptide transport	0.0152	3.1667
O	358	GO:0010035	response to inorganic substance	0.0152	3
O	359	GO:0051707	response to other organism	0.0152	1.375
O	360	GO:0045088	regulation of innate immune response	0.0152	1.1538
O	361	GO:0048660	regulation of smooth muscle cell proliferation	0.0152	0.625
O	362	GO:0032155	cell division site part	0.0152	0.3684
O	363	GO:0002757	immune response-activating signal transduction	0.0151	3.0526
O	364	GO:0042470	melanosome	0.0151	0.7333
O	365	GO:0070265	necrotic cell death	0.0151	0.3333
O	366	GO:0048839	inner ear development	0.0151	0.1429
O	367	GO:0048869	cellular developmental process	0.015	32.9667
O	368	GO:1903556	negative regulation of tumor necrosis factor superfamily cytokine production	0.015	0.2857
O	369	GO:0044459	plasma membrane part	0.0149	60.9333
O	370	GO:0043170	macromolecule metabolic process	0.0149	13.7
O	371	GO:0009967	positive regulation of signal transduction	0.0149	7.7241
O	372	GO:0010466	negative regulation of peptidase activity	0.0149	1.375
O	373	GO:1901739	regulation of myoblast fusion	0.0148	0.4
O	374	GO:0005070	SH3/SH2 adaptor activity	0.0148	0.3889
O	375	GO:0032479	regulation of type I interferon production	0.0148	0.3
O	376	GO:0009719	response to endogenous stimulus	0.0147	6.6667
O	377	GO:1901701	cellular response to oxygen-containing compound	0.0147	4
O	378	GO:0004866	endopeptidase inhibitor activity	0.0147	0.75
O	379	GO:1903146	regulation of mitophagy	0.0146	0.4286
O	380	GO:0050896	response to stimulus	0.0145	80.8333
O	381	GO:0004871	signal transducer activity	0.0145	12.8571
O	382	GO:0016477	cell migration	0.0145	2.5
O	383	GO:0004620	phospholipase activity	0.0145	0.5909
O	384	GO:0048518	positive regulation of biological process	0.0144	78
O	385	GO:0080134	regulation of response to stress	0.0144	9.5417
O	386	GO:0008092	cytoskeletal protein binding	0.0144	5.4643
O	387	GO:0098542	defense response to other organism	0.0144	2.25
O	388	GO:0071345	cellular response to cytokine stimulus	0.0144	1.4
O	389	GO:0045335	phagocytic vesicle	0.0144	0.4286
O	390	GO:0051606	detection of stimulus	0.0144	0.3125
O	391	GO:0004553	hydrolase activity, hydrolyzing O-glycosyl compounds	0.0144	0.3
O	392	GO:0004435	phosphatidylinositol phospholipase C activity	0.0144	0.1579
O	393	GO:0005886	plasma membrane	0.0142	70.0667
O	394	GO:0032880	regulation of protein localization	0.0142	2.72
O	395	GO:0009056	catabolic process	0.0141	29.4667
O	396	GO:0031090	organelle membrane	0.014	42.4
O	397	GO:0035591	signaling adaptor activity	0.014	0.3182
O	398	GO:0065008	regulation of biological quality	0.0139	40.8667
O	399	GO:0009628	response to abiotic stimulus	0.0139	5.3846
O	400	GO:0034123	positive regulation of toll-like receptor signaling pathway	0.0139	0.3333
O	401	GO:0099600	transmembrane receptor activity	0.0138	3.0385
O	402	GO:0002697	regulation of immune effector process	0.0138	1.6923
O	403	GO:0009612	response to mechanical stimulus	0.0138	1.4
O	404	GO:0050707	regulation of cytokine secretion	0.0138	0.8889
O	405	GO:0006687	glycosphingolipid metabolic process	0.0138	0.3889
O	406	GO:0006629	lipid metabolic process	0.0137	13.1724
O	407	GO:0010647	positive regulation of cell communication	0.0137	7.1154
O	408	GO:0008289	lipid binding	0.0137	3.1667
O	409	GO:0008366	axon ensheathment	0.0137	0.3182
O	410	GO:0005622	intracellular	0.0136	3.7333
O	411	GO:0001818	negative regulation of cytokine production	0.0136	1.2
O	412	GO:0030865	cortical cytoskeleton organization	0.0136	0.25
O	413	GO:0044444	cytoplasmic part	0.0135	287.1
O	414	GO:0044763	single-organism cellular process	0.0135	180.233
O	415	GO:0048523	negative regulation of cellular process	0.0135	36.0333
O	416	GO:0005770	late endosome	0.0135	0.5333
O	417	GO:0048519	negative regulation of biological process	0.0134	34.8333
O	418	GO:0043603	cellular amide metabolic process	0.0134	1.4118
O	419	GO:0031667	response to nutrient levels	0.0134	1.125
O	420	GO:0032502	developmental process	0.0133	63.2667
O	421	GO:0048522	positive regulation of cellular process	0.0133	38.8667
O	422	GO:0031410	cytoplasmic vesicle	0.0133	10.5
O	423	GO:0060255	regulation of macromolecule metabolic process	0.0133	9.1034
O	424	GO:0044255	cellular lipid metabolic process	0.0133	7.4483
O	425	GO:0019752	carboxylic acid metabolic process	0.0133	6.6786
O	426	GO:0005783	endoplasmic reticulum	0.0133	5.8148
O	427	GO:0007173	epidermal growth factor receptor signaling pathway	0.0133	0.2727
O	428	GO:0048856	anatomical structure development	0.0132	34.0333
O	429	GO:0048583	regulation of response to stimulus	0.0132	29.8
O	430	GO:1901698	response to nitrogen compound	0.0132	4.12
O	431	GO:0030098	lymphocyte differentiation	0.0132	0.3333
O	432	GO:0002920	regulation of humoral immune response	0.0132	0.3077
O	433	GO:0007165	signal transduction	0.0131	71.0667
O	434	GO:0019439	aromatic compound catabolic process	0.0131	1.25
O	435	GO:0031968	organelle outer membrane	0.0131	0.9286
O	436	GO:0050729	positive regulation of inflammatory response	0.0131	0.8571
O	437	GO:0045428	regulation of nitric oxide biosynthetic process	0.0131	0.75
O	438	GO:0031329	regulation of cellular catabolic process	0.013	1.9231
O	439	GO:0032934	sterol binding	0.013	0.75
O	440	GO:0043647	inositol phosphate metabolic process	0.013	0.3158
O	441	GO:0008152	metabolic process	0.0129	39.3
O	442	GO:0051246	regulation of protein metabolic process	0.0129	9
O	443	GO:0052689	carboxylic ester hydrolase activity	0.0129	0.5833
O	444	GO:0090003	regulation of establishment of protein localization to plasma membrane	0.0129	0.1667
O	445	GO:0071704	organic substance metabolic process	0.0128	47.9333
O	446	GO:0019538	protein metabolic process	0.0128	8.1852
O	447	GO:0007010	cytoskeleton organization	0.0128	5.2333
O	448	GO:0048471	perinuclear region of cytoplasm	0.0128	2.5185
O	449	GO:0043227	membrane-bounded organelle	0.0127	160.3
O	450	GO:0044710	single-organism metabolic process	0.0127	51.6667
O	451	GO:1901135	carbohydrate derivative metabolic process	0.0127	3.4074
O	452	GO:0042493	response to drug	0.0127	3.0556
O	453	GO:1903531	negative regulation of secretion by cell	0.0127	1.1429
O	454	GO:0045926	negative regulation of growth	0.0127	0.8333
O	455	GO:0070279	vitamin B6 binding	0.0127	0.5714
O	456	GO:0042590	antigen processing and presentation of exogenous peptide antigen via MHC class I	0.0127	0.4667
O	457	GO:0045103	intermediate filament-based process	0.0127	0.2857
O	458	GO:0051179	localization	0.0126	65
O	459	GO:0006082	organic acid metabolic process	0.0126	7.6071
O	460	GO:0006508	proteolysis	0.0126	5.9615
O	461	GO:0008610	lipid biosynthetic process	0.0126	2.1739
O	462	GO:0007167	enzyme linked receptor protein signaling pathway	0.0126	2.0952
O	463	GO:0050730	regulation of peptidyl-tyrosine phosphorylation	0.0126	1.2308
O	464	GO:0032481	positive regulation of type I interferon production	0.0126	0.3182
O	465	GO:0044699	single-organism process	0.0125	210.967
O	466	GO:0080090	regulation of primary metabolic process	0.0125	17.0345
O	467	GO:0030029	actin filament-based process	0.0125	1.4545
O	468	GO:0031214	biomineral tissue development	0.0125	0.2105
O	469	GO:0050794	regulation of cellular process	0.0124	134.667
O	470	GO:0044281	small molecule metabolic process	0.0124	16.4483
O	471	GO:0010638	positive regulation of organelle organization	0.0124	0.7222
O	472	GO:0044446	intracellular organelle part	0.0123	127.6
O	473	GO:0010941	regulation of cell death	0.0123	5.6667
O	474	GO:0006897	endocytosis	0.0123	1.8929
O	475	GO:0006936	muscle contraction	0.0123	0.95
O	476	GO:0051480	regulation of cytosolic calcium ion concentration	0.0123	0.75
O	477	GO:0030100	regulation of endocytosis	0.0123	0.7143
O	478	GO:0048008	platelet-derived growth factor receptor signaling pathway	0.0123	0.5
O	479	GO:0006807	nitrogen compound metabolic process	0.0122	14.1
O	480	GO:0006644	phospholipid metabolic process	0.0122	1.9643
O	481	GO:0010959	regulation of metal ion transport	0.0122	1.2857
O	482	GO:0008360	regulation of cell shape	0.0122	0.7
O	483	GO:0007154	cell communication	0.0121	4.6786
O	484	GO:0038023	signaling receptor activity	0.012	3.2308
O	485	GO:0002685	regulation of leukocyte migration	0.012	1.4615
O	486	GO:0002429	immune response-activating cell surface receptor signaling pathway	0.012	1.3889
O	487	GO:0009887	animal organ morphogenesis	0.012	0.9524
O	488	GO:0006066	alcohol metabolic process	0.012	0.75
O	489	GO:0045892	negative regulation of transcription, DNA-templated	0.012	0.5
O	490	GO:0051173	positive regulation of nitrogen compound metabolic process	0.0119	2.5263
O	491	GO:0030162	regulation of proteolysis	0.0119	2.0476
O	492	GO:0060548	negative regulation of cell death	0.0119	1.7368
O	493	GO:0002706	regulation of lymphocyte mediated immunity	0.0119	1.6667
O	494	GO:0042345	regulation of NF-kappaB import into nucleus	0.0119	0.8333
O	495	GO:0044422	organelle part	0.0118	131.5
O	496	GO:0050789	regulation of biological process	0.0118	122.767
O	497	GO:0044238	primary metabolic process	0.0118	41.7667
O	498	GO:0012501	programmed cell death	0.0118	5.6522
O	499	GO:0006461	protein complex assembly	0.0118	5.3704
O	500	GO:0022409	positive regulation of cell-cell adhesion	0.0118	1.25
O	501	GO:1901681	sulfur compound binding	0.0118	1
O	502	GO:0051384	response to glucocorticoid	0.0118	0.6667
O	503	GO:0030500	regulation of bone mineralization	0.0118	0.1765
O	504	GO:0040011	locomotion	0.0117	1.5
O	505	GO:1903555	regulation of tumor necrosis factor superfamily cytokine production	0.0117	1.375
O	506	GO:0065007	biological regulation	0.0116	137.533
O	507	GO:0032386	regulation of intracellular transport	0.0116	1.8636
O	508	GO:0009611	response to wounding	0.0116	0.8462
O	509	GO:0070372	regulation of ERK1 and ERK2 cascade	0.0116	0.8182
O	510	GO:0048678	response to axon injury	0.0116	0.625
O	511	GO:0044424	intracellular part	0.0115	240.667
O	512	GO:0043226	organelle	0.0115	129.167
O	513	GO:0048468	cell development	0.0115	2.1818
O	514	GO:0043254	regulation of protein complex assembly	0.0115	1.7273
O	515	GO:0051090	regulation of sequence-specific DNA binding transcription factor activity	0.0115	1.6522
O	516	GO:0031344	regulation of cell projection organization	0.0115	1.1071
O	517	GO:0022607	cellular component assembly	0.0114	14.4
O	518	GO:0004872	receptor activity	0.0114	8.7
O	519	GO:0051094	positive regulation of developmental process	0.0114	4.8148
O	520	GO:1903530	regulation of secretion by cell	0.0114	1.9048
O	521	GO:0005635	nuclear envelope	0.0114	0.75
O	522	GO:0051271	negative regulation of cellular component movement	0.0114	0.5385
O	523	GO:0016620	oxidoreductase activity, acting on the aldehyde or oxo group of donors, NAD or NADP as acceptor	0.0114	0.2857
O	524	GO:0006901	vesicle coating	0.0114	0.2857
O	525	GO:0005741	mitochondrial outer membrane	0.0114	0.2857
O	526	GO:0042593	glucose homeostasis	0.0114	0.2143
O	527	GO:0016020	membrane	0.0113	124.367
O	528	GO:0043231	intracellular membrane-bounded organelle	0.0113	82.1333
O	529	GO:0043067	regulation of programmed cell death	0.0113	5.6667
O	530	GO:0009897	external side of plasma membrane	0.0113	0.7931
O	531	GO:0031965	nuclear membrane	0.0112	1.2
O	532	GO:0016787	hydrolase activity	0.0111	25.4667
O	533	GO:0031323	regulation of cellular metabolic process	0.0111	13.3448
O	534	GO:0035556	intracellular signal transduction	0.0111	9.1333
O	535	GO:1901700	response to oxygen-containing compound	0.0111	7.7083
O	536	GO:0043436	oxoacid metabolic process	0.0111	6.7143
O	537	GO:0032735	positive regulation of interleukin-12 production	0.0111	0.5
O	538	GO:1902230	negative regulation of intrinsic apoptotic signaling pathway in response to DNA damage	0.0111	0.3333
O	539	GO:0032653	regulation of interleukin-10 production	0.0111	0.3333
O	540	GO:0042887	amide transmembrane transporter activity	0.0111	0.2727
O	541	GO:0043394	proteoglycan binding	0.0111	0.25
O	542	GO:0042339	keratan sulfate metabolic process	0.0111	0.25
O	543	GO:0030214	hyaluronan catabolic process	0.0111	0.25
O	544	GO:0055094	response to lipoprotein particle	0.0111	0.2
O	545	GO:0032501	multicellular organismal process	0.011	15.4138
O	546	GO:0023051	regulation of signaling	0.011	12.3793
O	547	GO:0097708	intracellular vesicle	0.011	9.1379
O	548	GO:0001666	response to hypoxia	0.011	1.3
O	549	GO:0043229	intracellular organelle	0.0109	74.5
O	550	GO:0051223	regulation of protein transport	0.0109	2.1765
O	551	GO:0044087	regulation of cellular component biogenesis	0.0109	2.1429
O	552	GO:0007596	blood coagulation	0.0109	0.8462
O	553	GO:0019882	antigen processing and presentation	0.0109	0.6316
O	554	GO:0019218	regulation of steroid metabolic process	0.0109	0.625
O	555	GO:0071675	regulation of mononuclear cell migration	0.0109	0.6
O	556	GO:0004896	cytokine receptor activity	0.0109	0.5
O	557	GO:0071840	cellular component organization or biogenesis	0.0108	43.3
O	558	GO:0016043	cellular component organization	0.0108	38.9333
O	559	GO:0031668	cellular response to extracellular stimulus	0.0108	0.7333
O	560	GO:0009966	regulation of signal transduction	0.0107	9.2759
O	561	GO:0019899	enzyme binding	0.0107	5.9
O	562	GO:0006979	response to oxidative stress	0.0107	0.96
O	563	GO:0009063	cellular amino acid catabolic process	0.0107	0.7895
O	564	GO:0072657	protein localization to membrane	0.0107	0.5833
O	565	total	NA	0.0106	443.9
O	566	GO:0003824	catalytic activity	0.0106	41.3333
O	567	GO:0071219	cellular response to molecule of bacterial origin	0.0106	1.2857
O	568	GO:1901136	carbohydrate derivative catabolic process	0.0106	1.2727
O	569	GO:0008234	cysteine-type peptidase activity	0.0106	0.6364
O	570	GO:0045765	regulation of angiogenesis	0.0106	0.5882
O	571	GO:1904375	regulation of protein localization to cell periphery	0.0106	0.2222
O	572	GO:0003674	molecular_function	0.0105	76.8
O	573	GO:0050878	regulation of body fluid levels	0.0105	1.6316
O	574	GO:0008150	biological_process	0.0104	77.2
O	575	GO:0065009	regulation of molecular function	0.0104	16.9333
O	576	GO:0060089	molecular transducer activity	0.0104	9.2667
O	577	GO:0046983	protein dimerization activity	0.0104	5.2593
O	578	GO:0002768	immune response-regulating cell surface receptor signaling pathway	0.0104	1.1875
O	579	GO:0051260	protein homooligomerization	0.0104	0.9524
O	580	GO:0050767	regulation of neurogenesis	0.0104	0.8214
O	581	GO:0010721	negative regulation of cell development	0.0104	0.7143
O	582	GO:0071294	cellular response to zinc ion	0.0104	0.1429
O	583	GO:0004672	protein kinase activity	0.0103	1
O	584	GO:0005515	protein binding	0.0102	140.767
O	585	GO:0098772	molecular function regulator	0.0102	7.6667
O	586	GO:0043069	negative regulation of programmed cell death	0.0102	2.25
O	587	GO:0006518	peptide metabolic process	0.0102	1
O	588	GO:0002521	leukocyte differentiation	0.0102	0.8462
O	589	GO:0007160	cell-matrix adhesion	0.0102	0.5833
O	590	GO:0002064	epithelial cell development	0.0102	0.4783
O	591	GO:0044448	cell cortex part	0.0102	0.2778
O	592	GO:0048037	cofactor binding	0.0101	1.4737
O	593	GO:0009749	response to glucose	0.0101	0.4667
O	594	GO:0002673	regulation of acute inflammatory response	0.0101	0.4167
O	595	GO:0005777	peroxisome	0.0101	0.2
O	596	GO:0005789	endoplasmic reticulum membrane	0.01	7.4
O	597	GO:0006355	regulation of transcription, DNA-templated	0.01	2.0833
O	598	GO:0045597	positive regulation of cell differentiation	0.01	2
O	599	GO:0003779	actin binding	0.01	2
O	600	GO:0022891	substrate-specific transmembrane transporter activity	0.01	1.88
O	601	GO:0071214	cellular response to abiotic stimulus	0.01	0.9091
O	602	GO:0002828	regulation of type 2 immune response	0.01	0.75
O	603	GO:0050777	negative regulation of immune response	0.01	0.6667
O	604	GO:0031589	cell-substrate adhesion	0.01	0.5455
O	605	GO:0030170	pyridoxal phosphate binding	0.01	0.4
O	606	GO:0030175	filopodium	0.01	0.25
O	607	GO:0009987	cellular process	0.0099	115.667
O	608	GO:0005737	cytoplasm	0.0099	39.0333
O	609	GO:0050790	regulation of catalytic activity	0.0099	11.5517
O	610	GO:0004888	transmembrane signaling receptor activity	0.0099	4.16
O	611	GO:1901699	cellular response to nitrogen compound	0.0099	1.8571
O	612	GO:0031349	positive regulation of defense response	0.0099	1.5714
O	613	GO:0007162	negative regulation of cell adhesion	0.0099	0.9091
O	614	GO:0019842	vitamin binding	0.0099	0.7778
O	615	GO:0042552	myelination	0.0099	0.3182
O	616	GO:0070167	regulation of biomineral tissue development	0.0099	0.2353
O	617	GO:0005488	binding	0.0098	158.433
O	618	GO:0044237	cellular metabolic process	0.0098	29.7667
O	619	GO:0006793	phosphorus metabolic process	0.0098	10.7667
O	620	GO:0097367	carbohydrate derivative binding	0.0098	8.7931
O	621	GO:0042995	cell projection	0.0098	4.0357
O	622	GO:0019901	protein kinase binding	0.0098	1.5217
O	623	GO:0006027	glycosaminoglycan catabolic process	0.0098	0.875
O	624	GO:0031224	intrinsic component of membrane	0.0097	52.5
O	625	GO:0051336	regulation of hydrolase activity	0.0097	5.8462
O	626	GO:0005102	receptor binding	0.0097	3.4348
O	627	GO:0051248	negative regulation of protein metabolic process	0.0097	2.7778
O	628	GO:0016773	phosphotransferase activity, alcohol group as acceptor	0.0097	1.6923
O	629	GO:0008017	microtubule binding	0.0097	0.8824
O	630	GO:1903039	positive regulation of leukocyte cell-cell adhesion	0.0097	0.5
O	631	GO:0009893	positive regulation of metabolic process	0.0096	13.5385
O	632	GO:0009058	biosynthetic process	0.0096	5.3704
O	633	GO:0099080	supramolecular complex	0.0096	2.1579
O	634	GO:0005198	structural molecule activity	0.0096	1.7778
O	635	GO:0022838	substrate-specific channel activity	0.0096	1.5417
O	636	GO:0030666	endocytic vesicle membrane	0.0096	1
O	637	GO:0044464	cell part	0.0095	125.633
O	638	GO:0019637	organophosphate metabolic process	0.0095	4.2069
O	639	GO:0007169	transmembrane receptor protein tyrosine kinase signaling pathway	0.0095	2.35
O	640	GO:0040008	regulation of growth	0.0095	1.8636
O	641	GO:0044425	membrane part	0.0094	69.5667
O	642	GO:0002791	regulation of peptide secretion	0.0094	1.1053
O	643	GO:0050715	positive regulation of cytokine secretion	0.0094	0.5833
O	644	GO:0031975	envelope	0.0094	0.4375
O	645	GO:0030449	regulation of complement activation	0.0094	0.2857
O	646	GO:0005829	cytosol	0.0093	38.0333
O	647	GO:0043933	macromolecular complex subunit organization	0.0093	6.0741
O	648	GO:0030234	enzyme regulator activity	0.0093	4.6667
O	649	GO:0016491	oxidoreductase activity	0.0093	3.8929
O	650	GO:0099512	supramolecular fiber	0.0093	2.3182
O	651	GO:0044089	positive regulation of cellular component biogenesis	0.0093	1.8125
O	652	GO:0099513	polymeric cytoskeletal fiber	0.0093	1.0476
O	653	GO:0050731	positive regulation of peptidyl-tyrosine phosphorylation	0.0093	1
O	654	GO:0007043	cell-cell junction assembly	0.0093	0.3333
O	655	GO:0038127	ERBB signaling pathway	0.0093	0.3077
O	656	GO:0090596	sensory organ morphogenesis	0.0093	0.25
O	657	GO:0043330	response to exogenous dsRNA	0.0093	0.1667
O	658	GO:0016021	integral component of membrane	0.0092	54.1667
O	659	GO:0031325	positive regulation of cellular metabolic process	0.0092	14.375
O	660	GO:0043234	protein complex	0.0092	7.1034
O	661	GO:0010243	response to organonitrogen compound	0.0092	2.625
O	662	GO:0044440	endosomal part	0.0092	1.5789
O	663	GO:0010008	endosome membrane	0.0092	1.5
O	664	GO:0002703	regulation of leukocyte mediated immunity	0.0092	1
O	665	GO:0009306	protein secretion	0.0092	0.7778
O	666	GO:0033116	endoplasmic reticulum-Golgi intermediate compartment membrane	0.0092	0.5
O	667	GO:0043232	intracellular non-membrane-bounded organelle	0.0091	12.1333
O	668	GO:0042803	protein homodimerization activity	0.0091	3
O	669	GO:0044419	interspecies interaction between organisms	0.0091	1.4706
O	670	GO:0006643	membrane lipid metabolic process	0.0091	0.6111
O	671	GO:0036293	response to decreased oxygen levels	0.0091	0.6
O	672	GO:0046488	phosphatidylinositol metabolic process	0.0091	0.5625
O	673	GO:1903078	positive regulation of protein localization to plasma membrane	0.0091	0.5
O	674	GO:1901362	organic cyclic compound biosynthetic process	0.0091	0.5
O	675	GO:0044093	positive regulation of molecular function	0.009	8.8148
O	676	GO:0003008	system process	0.009	4.5185
O	677	GO:0071822	protein complex subunit organization	0.009	4.5
O	678	GO:0098590	plasma membrane region	0.009	3.1538
O	679	GO:0006520	cellular amino acid metabolic process	0.009	1.2
O	680	GO:0051346	negative regulation of hydrolase activity	0.009	1.1905
O	681	GO:0004714	transmembrane receptor protein tyrosine kinase activity	0.009	0.4545
O	682	GO:0005057	signal transducer activity, downstream of receptor	0.009	0.45
O	683	GO:0010646	regulation of cell communication	0.0089	8.5556
O	684	GO:0031967	organelle envelope	0.0089	0.6667
O	685	GO:0010827	regulation of glucose transport	0.0089	0.4286
O	686	GO:0016209	antioxidant activity	0.0089	0.3478
O	687	GO:0043228	non-membrane-bounded organelle	0.0088	14.6
O	688	GO:0043168	anion binding	0.0088	12.8667
O	689	GO:0044432	endoplasmic reticulum part	0.0088	7.6667
O	690	GO:1902531	regulation of intracellular signal transduction	0.0088	5.4348
O	691	GO:0043086	negative regulation of catalytic activity	0.0088	3.95
O	692	GO:0010556	regulation of macromolecule biosynthetic process	0.0088	3.1304
O	693	GO:0006650	glycerophospholipid metabolic process	0.0088	1.3462
O	694	GO:0006672	ceramide metabolic process	0.0088	0.4286
O	695	GO:0008284	positive regulation of cell proliferation	0.0087	1.1579
O	696	GO:0002792	negative regulation of peptide secretion	0.0087	0.6154
O	697	GO:0043123	positive regulation of I-kappaB kinase/NF-kappaB signaling	0.0087	0.6
O	698	GO:1901568	fatty acid derivative metabolic process	0.0087	0.4286
O	699	GO:0032991	macromolecular complex	0.0086	11.8333
O	700	GO:0048878	chemical homeostasis	0.0086	2.381
O	701	GO:0002698	negative regulation of immune effector process	0.0086	0.75
O	702	GO:0061564	axon development	0.0086	0.5
O	703	GO:0060090	binding, bridging	0.0086	0.4545
O	704	GO:0034109	homotypic cell-cell adhesion	0.0086	0.1818
O	705	GO:0043167	ion binding	0.0085	36
O	706	GO:0019220	regulation of phosphate metabolic process	0.0085	3.8889
O	707	GO:0055114	oxidation-reduction process	0.0085	3.25
O	708	GO:0030864	cortical actin cytoskeleton	0.0085	0.5
O	709	GO:0008037	cell recognition	0.0085	0.4667
O	710	GO:0042542	response to hydrogen peroxide	0.0085	0.3636
O	711	GO:0032436	positive regulation of proteasomal ubiquitin-dependent protein catabolic process	0.0085	0.25
O	712	GO:0006464	cellular protein modification process	0.0084	1.7273
O	713	GO:0046486	glycerolipid metabolic process	0.0084	1.4815
O	714	GO:0015629	actin cytoskeleton	0.0084	0.9375
O	715	GO:0098771	inorganic ion homeostasis	0.0084	0.7778
O	716	GO:0099106	ion channel regulator activity	0.0084	0.1667
O	717	GO:0051704	multi-organism process	0.0083	4.5217
O	718	GO:0006915	apoptotic process	0.0083	2.8095
O	719	GO:0002790	peptide secretion	0.0083	2
O	720	GO:0007264	small GTPase mediated signal transduction	0.0083	1.5667
O	721	GO:0098796	membrane protein complex	0.0083	1.5263
O	722	GO:0051493	regulation of cytoskeleton organization	0.0083	1.1429
O	723	GO:0097530	granulocyte migration	0.0083	1
O	724	GO:0045216	cell-cell junction organization	0.0083	0.5625
O	725	GO:0014823	response to activity	0.0083	0.5
O	726	GO:0043112	receptor metabolic process	0.0083	0.3333
O	727	GO:0050885	neuromuscular process controlling balance	0.0083	0.25
O	728	GO:2001243	negative regulation of intrinsic apoptotic signaling pathway	0.0083	0.2
O	729	GO:0009268	response to pH	0.0083	0.2
O	730	GO:0007252	I-kappaB phosphorylation	0.0083	0.2
O	731	GO:0002577	regulation of antigen processing and presentation	0.0083	0.2
O	732	GO:0043236	laminin binding	0.0083	0.1667
O	733	GO:0051149	positive regulation of muscle cell differentiation	0.0083	0.1429
O	734	GO:0008509	anion transmembrane transporter activity	0.0083	0.125
O	735	GO:0046466	membrane lipid catabolic process	0.0083	0.0909
O	736	GO:0002833	positive regulation of response to biotic stimulus	0.0083	0.0714
O	737	GO:0071705	nitrogen compound transport	0.0082	3.5357
O	738	GO:0009894	regulation of catabolic process	0.0082	1.5
O	739	GO:0019900	kinase binding	0.0082	1.4231
O	740	GO:0030414	peptidase inhibitor activity	0.0082	0.75
O	741	GO:0051235	maintenance of location	0.0082	0.4545
O	742	GO:0065003	macromolecular complex assembly	0.0081	5.3333
O	743	GO:0044711	single-organism biosynthetic process	0.0081	4
O	744	GO:0045937	positive regulation of phosphate metabolic process	0.0081	3.8
O	745	GO:0044463	cell projection part	0.0081	1.125
O	746	GO:0052548	regulation of endopeptidase activity	0.0081	1.1
O	747	GO:0071356	cellular response to tumor necrosis factor	0.0081	0.8333
O	748	GO:0008652	cellular amino acid biosynthetic process	0.0081	0.4
O	749	GO:0022408	negative regulation of cell-cell adhesion	0.0081	0.3
O	750	GO:1901607	alpha-amino acid biosynthetic process	0.0081	0.2667
O	751	GO:0044273	sulfur compound catabolic process	0.0081	0.2
O	752	GO:0022892	substrate-specific transporter activity	0.008	4.3103
O	753	GO:0046872	metal ion binding	0.0079	17.9667
O	754	GO:0006796	phosphate-containing compound metabolic process	0.0079	7.5667
O	755	GO:0005509	calcium ion binding	0.0079	2.7143
O	756	GO:0050663	cytokine secretion	0.0079	1
O	757	GO:0050868	negative regulation of T cell activation	0.0079	0.5
O	758	GO:0009746	response to hexose	0.0079	0.3529
O	759	GO:0032088	negative regulation of NF-kappaB transcription factor activity	0.0079	0.2
O	760	GO:0043169	cation binding	0.0078	18.4
O	761	GO:0044260	cellular macromolecule metabolic process	0.0078	4.3667
O	762	GO:0032787	monocarboxylic acid metabolic process	0.0078	1.7308
O	763	GO:0050708	regulation of protein secretion	0.0078	1.375
O	764	GO:2000377	regulation of reactive oxygen species metabolic process	0.0078	0.875
O	765	GO:0051224	negative regulation of protein transport	0.0078	0.5
O	766	GO:0098802	plasma membrane receptor complex	0.0078	0.4615
O	767	GO:0051896	regulation of protein kinase B signaling	0.0078	0.2857
O	768	GO:0060191	regulation of lipase activity	0.0078	0.1818
O	769	GO:0005739	mitochondrion	0.0077	5.7857
O	770	GO:0033043	regulation of organelle organization	0.0077	3.4545
O	771	GO:0099081	supramolecular polymer	0.0077	1.7917
O	772	GO:0010628	positive regulation of gene expression	0.0077	1.625
O	773	GO:1901654	response to ketone	0.0077	1.5
O	774	GO:0097458	neuron part	0.0077	1.2083
O	775	GO:0044248	cellular catabolic process	0.0076	5.4074
O	776	GO:0071495	cellular response to endogenous stimulus	0.0076	1.4118
O	777	GO:0044282	small molecule catabolic process	0.0076	1.2
O	778	GO:0098636	protein complex involved in cell adhesion	0.0076	0.2
O	779	GO:0034641	cellular nitrogen compound metabolic process	0.0075	5.2308
O	780	GO:0031326	regulation of cellular biosynthetic process	0.0075	3.4
O	781	GO:0031401	positive regulation of protein modification process	0.0075	2.8333
O	782	GO:0045185	maintenance of protein location	0.0075	0.2857
O	783	GO:1900181	negative regulation of protein localization to nucleus	0.0075	0.2
O	784	GO:0010975	regulation of neuron projection development	0.0074	0.8261
O	785	GO:0010817	regulation of hormone levels	0.0074	0.6842
O	786	GO:0002460	adaptive immune response based on somatic recombination of immune receptors built from immunoglobulin superfamily domains	0.0074	0.4
O	787	GO:0070206	protein trimerization	0.0074	0.3
O	788	GO:0008305	integrin complex	0.0074	0.1429
O	789	GO:0044249	cellular biosynthetic process	0.0073	3.76
O	790	GO:0032270	positive regulation of cellular protein metabolic process	0.0073	3.7
O	791	GO:0061024	membrane organization	0.0073	2.8846
O	792	GO:0034097	response to cytokine	0.0073	1.4167
O	793	GO:0010604	positive regulation of macromolecule metabolic process	0.0072	4.3462
O	794	GO:0042325	regulation of phosphorylation	0.0072	3.9375
O	795	GO:0009725	response to hormone	0.0072	1.9375
O	796	GO:1904951	positive regulation of establishment of protein localization	0.0072	1.4706
O	797	GO:0045785	positive regulation of cell adhesion	0.0072	0.8571
O	798	GO:0060284	regulation of cell development	0.0072	0.7931
O	799	GO:0042129	regulation of T cell proliferation	0.0072	0.25
O	800	GO:0034248	regulation of cellular amide metabolic process	0.0072	0.2105
O	801	GO:0051174	regulation of phosphorus metabolic process	0.0071	3.4667
O	802	GO:0051249	regulation of lymphocyte activation	0.0071	1.7143
O	803	GO:0030193	regulation of blood coagulation	0.0071	0.1538
O	804	GO:0044430	cytoskeletal part	0.007	3.6154
O	805	GO:0048585	negative regulation of response to stimulus	0.007	2.1333
O	806	GO:0009653	anatomical structure morphogenesis	0.007	2
O	807	GO:0007267	cell-cell signaling	0.007	1.3333
O	808	GO:0016053	organic acid biosynthetic process	0.007	1
O	809	GO:0019902	phosphatase binding	0.007	0.5
O	810	GO:0016298	lipase activity	0.007	0.3913
O	811	GO:0032411	positive regulation of transporter activity	0.007	0.3333
O	812	GO:0002886	regulation of myeloid leukocyte mediated immunity	0.007	0.3333
O	813	GO:0036094	small molecule binding	0.0069	5.7333
O	814	GO:0005575	cellular_component	0.0068	18.4643
O	815	GO:0016740	transferase activity	0.0068	5.6207
O	816	GO:0031331	positive regulation of cellular catabolic process	0.0068	0.5714
O	817	GO:0044297	cell body	0.0068	0.4706
O	818	GO:0033500	carbohydrate homeostasis	0.0068	0.4615
O	819	GO:0008277	regulation of G-protein coupled receptor protein signaling pathway	0.0068	0.3
O	820	GO:0071702	organic substance transport	0.0067	3.1538
O	821	GO:0009968	negative regulation of signal transduction	0.0067	1.6667
O	822	GO:0016054	organic acid catabolic process	0.0067	1.2857
O	823	GO:0015267	channel activity	0.0067	1.1579
O	824	GO:0045861	negative regulation of proteolysis	0.0067	0.7143
O	825	GO:0050871	positive regulation of B cell activation	0.0067	0.5
O	826	GO:0071621	granulocyte chemotaxis	0.0067	0.4
O	827	GO:1903557	positive regulation of tumor necrosis factor superfamily cytokine production	0.0067	0.3333
O	828	GO:0035580	specific granule lumen	0.0067	0.25
O	829	GO:0010543	regulation of platelet activation	0.0067	0.25
O	830	GO:0005212	structural constituent of eye lens	0.0067	0.25
O	831	GO:0032675	regulation of interleukin-6 production	0.0067	0.2
O	832	GO:0002639	positive regulation of immunoglobulin production	0.0067	0.2
O	833	GO:0010883	regulation of lipid storage	0.0067	0.1667
O	834	GO:0002888	positive regulation of myeloid leukocyte mediated immunity	0.0067	0.1667
O	835	GO:0042287	MHC protein binding	0.0067	0.125
O	836	GO:0071359	cellular response to dsRNA	0.0067	0.1111
O	837	GO:0019217	regulation of fatty acid metabolic process	0.0067	0.1111
O	838	GO:0007159	leukocyte cell-cell adhesion	0.0067	0.1111
O	839	GO:0014912	negative regulation of smooth muscle cell migration	0.0067	0.1
O	840	GO:0035987	endodermal cell differentiation	0.0067	0.0909
O	841	GO:0045745	positive regulation of G-protein coupled receptor protein signaling pathway	0.0067	0.0833
O	842	GO:0006996	organelle organization	0.0066	7.0769
O	843	GO:0032268	regulation of cellular protein metabolic process	0.0066	6.75
O	844	GO:0009057	macromolecule catabolic process	0.0066	2.4167
O	845	GO:0071396	cellular response to lipid	0.0066	1
O	846	GO:0006690	icosanoid metabolic process	0.0066	0.5
O	847	GO:0005634	nucleus	0.0065	7.0714
O	848	GO:0022857	transmembrane transporter activity	0.0065	2.0741
O	849	GO:0002696	positive regulation of leukocyte activation	0.0065	1
O	850	GO:0014910	regulation of smooth muscle cell migration	0.0065	0.75
O	851	GO:0030855	epithelial cell differentiation	0.0065	0.6842
O	852	GO:0009890	negative regulation of biosynthetic process	0.0065	0.375
O	853	GO:0051247	positive regulation of protein metabolic process	0.0064	3.7895
O	854	GO:0044429	mitochondrial part	0.0064	2.72
O	855	GO:0051345	positive regulation of hydrolase activity	0.0064	2.3929
O	856	GO:0010506	regulation of autophagy	0.0064	0.75
O	857	GO:0006606	protein import into nucleus	0.0064	0.4545
O	858	GO:0050921	positive regulation of chemotaxis	0.0064	0.4444
O	859	GO:0050817	coagulation	0.0064	0.4118
O	860	GO:0002028	regulation of sodium ion transport	0.0064	0.25
O	861	GO:1901363	heterocyclic compound binding	0.0063	8.5
O	862	GO:0044707	single-multicellular organism process	0.0063	5.6
O	863	GO:0030155	regulation of cell adhesion	0.0063	1.25
O	864	GO:0050867	positive regulation of cell activation	0.0063	0.6667
O	865	GO:0042594	response to starvation	0.0063	0.6667
O	866	GO:0050852	T cell receptor signaling pathway	0.0063	0.3333
O	867	GO:0051651	maintenance of location in cell	0.0063	0.25
O	868	GO:0006811	ion transport	0.0062	3.2963
O	869	GO:0022411	cellular component disassembly	0.0062	1
O	870	GO:0098589	membrane region	0.0062	0.6364
O	871	GO:1900034	regulation of cellular response to heat	0.0062	0.1429
O	872	GO:0010468	regulation of gene expression	0.0061	4.3478
O	873	GO:0043068	positive regulation of programmed cell death	0.0061	1.4
O	874	GO:0016301	kinase activity	0.0061	1.2917
O	875	GO:1903829	positive regulation of cellular protein localization	0.0061	0.9231
O	876	GO:0046395	carboxylic acid catabolic process	0.0061	0.75
O	877	GO:0044764	multi-organism cellular process	0.0061	0.75
O	878	GO:0002705	positive regulation of leukocyte mediated immunity	0.0061	0.6667
O	879	GO:0050764	regulation of phagocytosis	0.0061	0.4286
O	880	GO:0070527	platelet aggregation	0.0061	0.1111
O	881	GO:0097159	organic cyclic compound binding	0.006	10.9667
O	882	GO:0001934	positive regulation of protein phosphorylation	0.006	1.7857
O	883	GO:0051961	negative regulation of nervous system development	0.006	0.5238
O	884	GO:0051607	defense response to virus	0.006	0.4286
O	885	GO:2001234	negative regulation of apoptotic signaling pathway	0.006	0.4
O	886	GO:0016247	channel regulator activity	0.006	0.3125
O	887	GO:1903509	liposaccharide metabolic process	0.006	0.1333
O	888	GO:0043085	positive regulation of catalytic activity	0.0059	4.0714
O	889	GO:0051252	regulation of RNA metabolic process	0.0059	3.0417
O	890	GO:0003676	nucleic acid binding	0.0059	2.7586
O	891	GO:0023057	negative regulation of signaling	0.0059	2.2143
O	892	GO:1901566	organonitrogen compound biosynthetic process	0.0059	1.6316
O	893	GO:0043066	negative regulation of apoptotic process	0.0059	1.5714
O	894	GO:0005794	Golgi apparatus	0.0059	1.2143
O	895	GO:0046394	carboxylic acid biosynthetic process	0.0059	0.7619
O	896	GO:0032760	positive regulation of tumor necrosis factor production	0.0059	0.5
O	897	GO:0071222	cellular response to lipopolysaccharide	0.0059	0.4286
O	898	GO:0016758	transferase activity, transferring hexosyl groups	0.0059	0.4
O	899	GO:0050768	negative regulation of neurogenesis	0.0059	0.3333
O	900	GO:0043410	positive regulation of MAPK cascade	0.0058	1.2727
O	901	GO:0052547	regulation of peptidase activity	0.0058	1.0714
O	902	GO:0005768	endosome	0.0058	0.9655
O	903	GO:0008047	enzyme activator activity	0.0058	0.8462
O	904	GO:0042113	B cell activation	0.0058	0.3077
O	905	GO:0003725	double-stranded RNA binding	0.0058	0.1111
O	906	GO:0042592	homeostatic process	0.0057	3.0556
O	907	GO:1903506	regulation of nucleic acid-templated transcription	0.0057	2.4615
O	908	GO:0051726	regulation of cell cycle	0.0057	1.25
O	909	GO:0030036	actin cytoskeleton organization	0.0057	0.7059
O	910	GO:0010977	negative regulation of neuron projection development	0.0057	0.2222
O	911	GO:0044428	nuclear part	0.0056	7.9
O	912	GO:0015031	protein transport	0.0056	2.125
O	913	GO:0043269	regulation of ion transport	0.0056	1.9474
O	914	GO:0050865	regulation of cell activation	0.0056	1.875
O	915	GO:0016772	transferase activity, transferring phosphorus-containing groups	0.0056	1.2308
O	916	GO:0005759	mitochondrial matrix	0.0056	0.9286
O	917	GO:0015631	tubulin binding	0.0056	0.5909
O	918	GO:0071241	cellular response to inorganic substance	0.0056	0.5385
O	919	GO:0072594	establishment of protein localization to organelle	0.0056	0.4286
O	920	GO:0050766	positive regulation of phagocytosis	0.0056	0.25
O	921	GO:0010665	regulation of cardiac muscle cell apoptotic process	0.0056	0.25
O	922	GO:0002699	positive regulation of immune effector process	0.0056	0.25
O	923	GO:1904377	positive regulation of protein localization to cell periphery	0.0056	0.2222
O	924	GO:0043306	positive regulation of mast cell degranulation	0.0056	0.1667
O	925	GO:0034616	response to laminar fluid shear stress	0.0056	0.1111
O	926	GO:0030574	collagen catabolic process	0.0056	0.1
O	927	GO:0046907	intracellular transport	0.0055	2.5625
O	928	GO:0019725	cellular homeostasis	0.0055	2.1875
O	929	GO:0016310	phosphorylation	0.0055	1.625
O	930	GO:1902680	positive regulation of RNA biosynthetic process	0.0055	0.6667
O	931	GO:0030176	integral component of endoplasmic reticulum membrane	0.0055	0.2222
O	932	GO:0042308	negative regulation of protein import into nucleus	0.0055	0.2
O	933	GO:0051171	regulation of nitrogen compound metabolic process	0.0054	4.2308
O	934	GO:0015833	peptide transport	0.0054	2.04
O	935	GO:1902533	positive regulation of intracellular signal transduction	0.0054	1.7778
O	936	GO:0051259	protein oligomerization	0.0054	1.3333
O	937	GO:0030135	coated vesicle	0.0054	1.2
O	938	GO:0051347	positive regulation of transferase activity	0.0054	1.0833
O	939	GO:0008104	protein localization	0.0053	3.4583
O	940	GO:0001932	regulation of protein phosphorylation	0.0053	2.7059
O	941	GO:0006357	regulation of transcription from RNA polymerase II promoter	0.0053	1.5238
O	942	GO:0005975	carbohydrate metabolic process	0.0053	1.3333
O	943	GO:0055080	cation homeostasis	0.0053	1.1818
O	944	GO:0055082	cellular chemical homeostasis	0.0053	0.8333
O	945	GO:0022407	regulation of cell-cell adhesion	0.0053	0.8333
O	946	GO:0030246	carbohydrate binding	0.0053	0.7778
O	947	GO:0043122	regulation of I-kappaB kinase/NF-kappaB signaling	0.0053	0.7143
O	948	GO:0097190	apoptotic signaling pathway	0.0053	0.6667
O	949	GO:0046883	regulation of hormone secretion	0.0053	0.2857
O	950	GO:1903037	regulation of leukocyte cell-cell adhesion	0.0052	4
O	951	GO:0005215	transporter activity	0.0052	3.125
O	952	GO:1902589	single-organism organelle organization	0.0052	1.6522
O	953	GO:0042110	T cell activation	0.0052	0.7143
O	954	GO:0002758	innate immune response-activating signal transduction	0.0052	0.7143
O	955	GO:0032553	ribonucleotide binding	0.0051	2.9231
O	956	GO:0044267	cellular protein metabolic process	0.0051	1.5
O	957	GO:0030336	negative regulation of cell migration	0.0051	0.9091
O	958	GO:0031966	mitochondrial membrane	0.0051	0.88
O	959	GO:0006575	cellular modified amino acid metabolic process	0.0051	0.3182
O	960	GO:0031399	regulation of protein modification process	0.005	3.0526
O	961	GO:0010648	negative regulation of cell communication	0.005	2.1765
O	962	GO:0045121	membrane raft	0.005	1.4
O	963	GO:0048731	system development	0.005	1.2857
O	964	GO:0033674	positive regulation of kinase activity	0.005	1.1667
O	965	GO:0009896	positive regulation of catabolic process	0.005	0.7857
O	966	GO:1903034	regulation of response to wounding	0.005	0.625
O	967	GO:0061135	endopeptidase regulator activity	0.005	0.6
O	968	GO:0032755	positive regulation of interleukin-6 production	0.005	0.4286
O	969	GO:0007599	hemostasis	0.005	0.4286
O	970	GO:0034329	cell junction assembly	0.005	0.3846
O	971	GO:0045665	negative regulation of neuron differentiation	0.005	0.25
O	972	GO:0009889	regulation of biosynthetic process	0.0049	4.3043
O	973	GO:0019219	regulation of nucleobase-containing compound metabolic process	0.0049	2.6316
O	974	GO:0008283	cell proliferation	0.0049	1.25
O	975	GO:0019216	regulation of lipid metabolic process	0.0049	1.2
O	976	GO:0070482	response to oxygen levels	0.0049	0.8889
O	977	GO:0031334	positive regulation of protein complex assembly	0.0049	0.5
O	978	GO:0002687	positive regulation of leukocyte migration	0.0049	0.2857
O	979	GO:1904590	negative regulation of protein import	0.0049	0.2222
O	980	GO:0035639	purine ribonucleoside triphosphate binding	0.0048	3.0714
O	981	GO:0055085	transmembrane transport	0.0048	2.5385
O	982	GO:0051020	GTPase binding	0.0048	0.8
O	983	GO:0090407	organophosphate biosynthetic process	0.0048	0.6667
O	984	GO:0043502	regulation of muscle adaptation	0.0048	0.25
O	985	GO:0060143	positive regulation of syncytium formation by plasma membrane fusion	0.0048	0.2
O	986	GO:0030097	hemopoiesis	0.0048	0.2
O	987	GO:0051881	regulation of mitochondrial membrane potential	0.0048	0.1429
O	988	GO:0050920	regulation of chemotaxis	0.0048	0.1429
O	989	GO:0050810	regulation of steroid biosynthetic process	0.0048	0.1429
O	990	GO:0007040	lysosome organization	0.0048	0.1429
O	991	GO:0071331	cellular response to hexose stimulus	0.0048	0.1
O	992	GO:0022414	reproductive process	0.0047	1.8421
O	993	GO:0030658	transport vesicle membrane	0.0047	1.2
O	994	GO:0043412	macromolecule modification	0.0047	1.1304
O	995	GO:0023052	signaling	0.0047	0.7727
O	996	GO:0032680	regulation of tumor necrosis factor production	0.0047	0.5556
O	997	GO:1903038	negative regulation of leukocyte cell-cell adhesion	0.0047	0.5
O	998	GO:0008654	phospholipid biosynthetic process	0.0047	0.5
O	999	GO:0042562	hormone binding	0.0047	0.3333
O	1000	GO:0035690	cellular response to drug	0.0047	0.1176
O	1001	GO:0003723	RNA binding	0.0046	2.4333
O	1002	GO:0018130	heterocycle biosynthetic process	0.0046	1.2308
O	1003	GO:0031012	extracellular matrix	0.0046	0.8333
O	1004	GO:0032944	regulation of mononuclear cell proliferation	0.0046	0.75
O	1005	GO:0044700	single organism signaling	0.0046	0.5217
O	1006	GO:0006665	sphingolipid metabolic process	0.0046	0.3684
O	1007	GO:0043331	response to dsRNA	0.0046	0.3333
O	1008	GO:0031669	cellular response to nutrient levels	0.0046	0.3333
O	1009	GO:0046906	tetrapyrrole binding	0.0046	0.2222
O	1010	GO:0006725	cellular aromatic compound metabolic process	0.0045	4.2414
O	1011	GO:0055065	metal ion homeostasis	0.0045	1
O	1012	GO:0032774	RNA biosynthetic process	0.0045	0.7895
O	1013	GO:0033365	protein localization to organelle	0.0045	0.6923
O	1014	GO:0005911	cell-cell junction	0.0045	0.6818
O	1015	GO:0002221	pattern recognition receptor signaling pathway	0.0045	0.6364
O	1016	GO:0061041	regulation of wound healing	0.0045	0.5556
O	1017	GO:0002708	positive regulation of lymphocyte mediated immunity	0.0045	0.5
O	1018	GO:0010564	regulation of cell cycle process	0.0045	0.4286
O	1019	GO:0016052	carbohydrate catabolic process	0.0045	0.4
O	1020	GO:1904589	regulation of protein import	0.0045	0.375
O	1021	GO:0033554	cellular response to stress	0.0044	3.2941
O	1022	GO:0031324	negative regulation of cellular metabolic process	0.0044	1.8095
O	1023	GO:0006812	cation transport	0.0044	1.619
O	1024	GO:0043408	regulation of MAPK cascade	0.0044	1.0909
O	1025	GO:0097435	supramolecular fiber organization	0.0044	1
O	1026	GO:0051960	regulation of nervous system development	0.0044	0.8276
O	1027	GO:1901615	organic hydroxy compound metabolic process	0.0044	0.75
O	1028	GO:0032970	regulation of actin filament-based process	0.0044	0.5385
O	1029	GO:0007015	actin filament organization	0.0044	0.5
O	1030	GO:0043280	positive regulation of cysteine-type endopeptidase activity involved in apoptotic process	0.0044	0.3
O	1031	GO:0032555	purine ribonucleotide binding	0.0043	2.7407
O	1032	GO:0042327	positive regulation of phosphorylation	0.0043	2.25
O	1033	GO:0043065	positive regulation of apoptotic process	0.0043	1.1667
O	1034	GO:0006919	activation of cysteine-type endopeptidase activity involved in apoptotic process	0.0043	0.5714
O	1035	GO:1903532	positive regulation of secretion by cell	0.0043	0.5625
O	1036	GO:1902679	negative regulation of RNA biosynthetic process	0.0043	0.5
O	1037	GO:0010043	response to zinc ion	0.0043	0.1333
O	1038	GO:0000166	nucleotide binding	0.0042	2.48
O	1039	GO:0030030	cell projection organization	0.0042	0.96
O	1040	GO:1902532	negative regulation of intracellular signal transduction	0.0042	0.7273
O	1041	GO:0000302	response to reactive oxygen species	0.0042	0.7273
O	1042	GO:0015672	monovalent inorganic cation transport	0.0042	0.7083
O	1043	GO:1902253	regulation of intrinsic apoptotic signaling pathway by p53 class mediator	0.0042	0.5
O	1044	GO:0090022	regulation of neutrophil chemotaxis	0.0042	0.5
O	1045	GO:0043204	perikaryon	0.0042	0.5
O	1046	GO:0002449	lymphocyte mediated immunity	0.0042	0.5
O	1047	GO:0031406	carboxylic acid binding	0.0042	0.4
O	1048	GO:2001020	regulation of response to DNA damage stimulus	0.0042	0.3333
O	1049	GO:1901687	glutathione derivative biosynthetic process	0.0042	0.25
O	1050	GO:0050886	endocrine process	0.0042	0.25
O	1051	GO:0045664	regulation of neuron differentiation	0.0042	0.2069
O	1052	GO:0035303	regulation of dephosphorylation	0.0042	0.2
O	1053	GO:0060249	anatomical structure homeostasis	0.0042	0.1667
O	1054	GO:0002686	negative regulation of leukocyte migration	0.0042	0.1667
O	1055	GO:0061245	establishment or maintenance of bipolar cell polarity	0.0042	0.1429
O	1056	GO:0035023	regulation of Rho protein signal transduction	0.0042	0.1429
O	1057	GO:0032677	regulation of interleukin-8 production	0.0042	0.1111
O	1058	GO:0016765	transferase activity, transferring alkyl or aryl (other than methyl) groups	0.0042	0.1
O	1059	GO:0009065	glutamine family amino acid catabolic process	0.0042	0.1
O	1060	GO:0016788	hydrolase activity, acting on ester bonds	0.0041	1.6154
O	1061	GO:0005543	phospholipid binding	0.0041	1
O	1062	GO:0006790	sulfur compound metabolic process	0.0041	0.75
O	1063	GO:0002700	regulation of production of molecular mediator of immune response	0.0041	0.75
O	1064	GO:0010951	negative regulation of endopeptidase activity	0.0041	0.3846
O	1065	GO:0022843	voltage-gated cation channel activity	0.0041	0.2353
O	1066	GO:0008270	zinc ion binding	0.004	2.2
O	1067	GO:0098857	membrane microdomain	0.004	0.9167
O	1068	GO:0070848	response to growth factor	0.004	0.6
O	1069	GO:0032550	purine ribonucleoside binding	0.004	0.5652
O	1070	GO:1905952	regulation of lipid localization	0.004	0.5
O	1071	GO:0050709	negative regulation of protein secretion	0.004	0.2143
O	1072	GO:0042886	amide transport	0.0039	1.9524
O	1073	GO:0050801	ion homeostasis	0.0039	1.0909
O	1074	GO:0034645	cellular macromolecule biosynthetic process	0.0039	0.75
O	1075	GO:0019867	outer membrane	0.0039	0.5
O	1076	GO:0031902	late endosome membrane	0.0039	0.3333
O	1077	GO:0046890	regulation of lipid biosynthetic process	0.0039	0.2222
O	1078	GO:0031032	actomyosin structure organization	0.0039	0.1818
O	1079	GO:1901360	organic cyclic compound metabolic process	0.0038	3.1034
O	1080	GO:0015075	ion transmembrane transporter activity	0.0038	1.7727
O	1081	GO:0032269	negative regulation of cellular protein metabolic process	0.0038	1.75
O	1082	GO:0032559	adenyl ribonucleotide binding	0.0038	1.3158
O	1083	GO:0050870	positive regulation of T cell activation	0.0038	0.6667
O	1084	GO:0043900	regulation of multi-organism process	0.0038	0.5
O	1085	GO:1990351	transporter complex	0.0038	0.4615
O	1086	GO:1903076	regulation of protein localization to plasma membrane	0.0038	0.2857
O	1087	GO:0072341	modified amino acid binding	0.0038	0.2
O	1088	GO:2001141	regulation of RNA biosynthetic process	0.0037	1.9167
O	1089	GO:1901361	organic cyclic compound catabolic process	0.0037	0.7273
O	1090	GO:0043516	regulation of DNA damage response, signal transduction by p53 class mediator	0.0037	0.5
O	1091	GO:0002714	positive regulation of B cell mediated immunity	0.0037	0.3333
O	1092	GO:0072593	reactive oxygen species metabolic process	0.0037	0.2857
O	1093	GO:0002824	positive regulation of adaptive immune response based on somatic recombination of immune receptors built from immunoglobulin superfamily domains	0.0037	0.25
O	1094	GO:0031345	negative regulation of cell projection organization	0.0037	0.2353
O	1095	GO:0030665	clathrin-coated vesicle membrane	0.0037	0.2
O	1096	GO:0001816	cytokine production	0.0037	0.2
O	1097	GO:1901570	fatty acid derivative biosynthetic process	0.0037	0.1
O	1098	GO:1903010	regulation of bone development	0.0037	0.0625
O	1099	GO:0046914	transition metal ion binding	0.0036	2.0667
O	1100	GO:0007186	G-protein coupled receptor signaling pathway	0.0036	0.7
O	1101	GO:1903533	regulation of protein targeting	0.0036	0.6667
O	1102	GO:0034765	regulation of ion transmembrane transport	0.0036	0.4375
O	1103	GO:0002443	leukocyte mediated immunity	0.0036	0.4
O	1104	GO:0033036	macromolecule localization	0.0035	2.0455
O	1105	GO:0010562	positive regulation of phosphorus metabolic process	0.0035	1.2727
O	1106	GO:0032844	regulation of homeostatic process	0.0035	0.8
O	1107	GO:0034762	regulation of transmembrane transport	0.0035	0.7143
O	1108	GO:0042277	peptide binding	0.0035	0.7
O	1109	GO:0032561	guanyl ribonucleotide binding	0.0035	0.6
O	1110	GO:0034504	protein localization to nucleus	0.0035	0.5556
O	1111	GO:0009267	cellular response to starvation	0.0035	0.4
O	1112	GO:0044309	neuron spine	0.0035	0.1667
O	1113	GO:0034622	cellular macromolecular complex assembly	0.0034	1.1429
O	1114	GO:0044456	synapse part	0.0034	0.6538
O	1115	GO:0032549	ribonucleoside binding	0.0034	0.6364
O	1116	GO:0001558	regulation of cell growth	0.0034	0.5
O	1117	GO:1903729	regulation of plasma membrane organization	0.0034	0.3
O	1118	GO:0098858	actin-based cell projection	0.0034	0.1304
O	1119	GO:0017076	purine nucleotide binding	0.0033	2.9545
O	1120	GO:1901265	nucleoside phosphate binding	0.0033	2.4444
O	1121	GO:0031328	positive regulation of cellular biosynthetic process	0.0033	1.3636
O	1122	GO:0071900	regulation of protein serine/threonine kinase activity	0.0033	0.8
O	1123	GO:0050863	regulation of T cell activation	0.0033	0.7
O	1124	GO:0030001	metal ion transport	0.0033	0.5556
O	1125	GO:1902229	regulation of intrinsic apoptotic signaling pathway in response to DNA damage	0.0033	0.5
O	1126	GO:0090279	regulation of calcium ion import	0.0033	0.5
O	1127	GO:0051928	positive regulation of calcium ion transport	0.0033	0.5
O	1128	GO:0045017	glycerolipid biosynthetic process	0.0033	0.4
O	1129	GO:0033003	regulation of mast cell activation	0.0033	0.3333
O	1130	GO:0030595	leukocyte chemotaxis	0.0033	0.25
O	1131	GO:0007250	activation of NF-kappaB-inducing kinase activity	0.0033	0.25
O	1132	GO:0051897	positive regulation of protein kinase B signaling	0.0033	0.2222
O	1133	GO:0070613	regulation of protein processing	0.0033	0.2
O	1134	GO:0042611	MHC protein complex	0.0033	0.2
O	1135	GO:1901800	positive regulation of proteasomal protein catabolic process	0.0033	0.1667
O	1136	GO:1903428	positive regulation of reactive oxygen species biosynthetic process	0.0033	0.1429
O	1137	GO:0033363	secretory granule organization	0.0033	0.125
O	1138	GO:0006139	nucleobase-containing compound metabolic process	0.0032	1.7407
O	1139	GO:0022803	passive transmembrane transporter activity	0.0032	1.1333
O	1140	GO:0044057	regulation of system process	0.0032	1.0714
O	1141	GO:0042330	taxis	0.0032	0.75
O	1142	GO:0001883	purine nucleoside binding	0.0032	0.5417
O	1143	GO:0042742	defense response to bacterium	0.0032	0.5
O	1144	GO:0016741	transferase activity, transferring one-carbon groups	0.0032	0.3125
O	1145	GO:0051641	cellular localization	0.0031	1.5385
O	1146	GO:0009892	negative regulation of metabolic process	0.0031	1.4783
O	1147	GO:0043235	receptor complex	0.0031	1.3333
O	1148	GO:0009888	tissue development	0.0031	1.0714
O	1149	GO:0071407	cellular response to organic cyclic compound	0.0031	1
O	1150	GO:0043547	positive regulation of GTPase activity	0.0031	0.6957
O	1151	GO:0005525	GTP binding	0.0031	0.68
O	1152	GO:0000139	Golgi membrane	0.0031	0.6667
O	1153	GO:0080135	regulation of cellular response to stress	0.0031	0.65
O	1154	GO:0005578	proteinaceous extracellular matrix	0.0031	0.5263
O	1155	GO:0001822	kidney development	0.0031	0.375
O	1156	GO:0050905	neuromuscular process	0.0031	0.2
O	1157	GO:0005319	lipid transporter activity	0.0031	0.2
O	1158	GO:0001667	ameboidal-type cell migration	0.0031	0.1538
O	1159	GO:0019751	polyol metabolic process	0.0031	0.0952
O	1160	GO:2000112	regulation of cellular macromolecule biosynthetic process	0.003	1.5714
O	1161	GO:0046483	heterocycle metabolic process	0.003	1.3846
O	1162	GO:0045859	regulation of protein kinase activity	0.003	1.2
O	1163	GO:1902582	single-organism intracellular transport	0.003	0.9286
O	1164	GO:0045944	positive regulation of transcription from RNA polymerase II promoter	0.003	0.8947
O	1165	GO:1902495	transmembrane transporter complex	0.003	0.7273
O	1166	GO:1902494	catalytic complex	0.003	0.6667
O	1167	GO:0030593	neutrophil chemotaxis	0.003	0.5
O	1168	GO:0001882	nucleoside binding	0.003	0.48
O	1169	GO:0043623	cellular protein complex assembly	0.003	0.4286
O	1170	GO:0045582	positive regulation of T cell differentiation	0.003	0.3333
O	1171	GO:0002702	positive regulation of production of molecular mediator of immune response	0.003	0.3333
O	1172	GO:0032387	negative regulation of intracellular transport	0.003	0.3
O	1173	GO:0005178	integrin binding	0.003	0.1818
O	1174	GO:0010640	regulation of platelet-derived growth factor receptor signaling pathway	0.003	0.1667
O	1175	GO:0003924	GTPase activity	0.003	0.1429
O	1176	GO:0001726	ruffle	0.003	0.1429
O	1177	GO:0043902	positive regulation of multi-organism process	0.003	0.1
O	1178	GO:0097110	scaffold protein binding	0.003	0.0667
O	1179	GO:0043901	negative regulation of multi-organism process	0.003	0.0667
O	1180	GO:0010605	negative regulation of macromolecule metabolic process	0.0029	1.4211
O	1181	GO:0045184	establishment of protein localization	0.0029	1.3043
O	1182	GO:0051254	positive regulation of RNA metabolic process	0.0029	1.2308
O	1183	GO:0006468	protein phosphorylation	0.0029	0.8235
O	1184	GO:0043087	regulation of GTPase activity	0.0029	0.7083
O	1185	GO:0040013	negative regulation of locomotion	0.0029	0.3333
O	1186	GO:0003677	DNA binding	0.0029	0.3182
O	1187	GO:0071248	cellular response to metal ion	0.0029	0.2778
O	1188	GO:0002224	toll-like receptor signaling pathway	0.0029	0.1818
O	1189	GO:0014069	postsynaptic density	0.0029	0.1
O	1190	GO:0036211	protein modification process	0.0028	1.6
O	1191	GO:0060627	regulation of vesicle-mediated transport	0.0028	1.2
O	1192	GO:0070228	regulation of lymphocyte apoptotic process	0.0028	1
O	1193	GO:0044723	single-organism carbohydrate metabolic process	0.0028	0.7143
O	1194	GO:0005216	ion channel activity	0.0028	0.6429
O	1195	GO:0004674	protein serine/threonine kinase activity	0.0028	0.4286
O	1196	GO:0030133	transport vesicle	0.0028	0.2609
O	1197	GO:0042445	hormone metabolic process	0.0028	0.2353
O	1198	GO:0071333	cellular response to glucose stimulus	0.0028	0.1667
O	1199	GO:0019207	kinase regulator activity	0.0028	0.125
O	1200	GO:0030834	regulation of actin filament depolymerization	0.0028	0.1
O	1201	GO:0030278	regulation of ossification	0.0028	0.0667
O	1202	GO:0005540	hyaluronic acid binding	0.0028	0.05
O	1203	GO:0043549	regulation of kinase activity	0.0027	2.1667
O	1204	GO:0051649	establishment of localization in cell	0.0027	1.875
O	1205	GO:0008324	cation transmembrane transporter activity	0.0027	0.5909
O	1206	GO:0034330	cell junction organization	0.0027	0.4545
O	1207	GO:0008083	growth factor activity	0.0027	0.4545
O	1208	GO:0043178	alcohol binding	0.0027	0.4
O	1209	GO:0050670	regulation of lymphocyte proliferation	0.0027	0.3333
O	1210	GO:0042578	phosphoric ester hydrolase activity	0.0027	0.25
O	1211	GO:0030674	protein binding, bridging	0.0027	0.2
O	1212	GO:0005654	nucleoplasm	0.0026	1.72
O	1213	GO:2000021	regulation of ion homeostasis	0.0026	1.25
O	1214	GO:0045935	positive regulation of nucleobase-containing compound metabolic process	0.0026	1.1176
O	1215	GO:0071417	cellular response to organonitrogen compound	0.0026	0.875
O	1216	GO:0006886	intracellular protein transport	0.0026	0.5455
O	1217	GO:2001237	negative regulation of extrinsic apoptotic signaling pathway	0.0026	0.5
O	1218	GO:0034613	cellular protein localization	0.0026	0.2857
O	1219	GO:0050851	antigen receptor-mediated signaling pathway	0.0026	0.2727
O	1220	GO:0051056	regulation of small GTPase mediated signal transduction	0.0026	0.2667
O	1221	GO:0031346	positive regulation of cell projection organization	0.0026	0.25
O	1222	GO:0060760	positive regulation of response to cytokine stimulus	0.0026	0.1667
O	1223	GO:0002823	negative regulation of adaptive immune response based on somatic recombination of immune receptors built from immunoglobulin superfamily domains	0.0026	0.1667
O	1224	GO:0034405	response to fluid shear stress	0.0026	0.1429
O	1225	GO:0000910	cytokinesis	0.0026	0.1429
O	1226	GO:0051092	positive regulation of NF-kappaB transcription factor activity	0.0026	0.125
O	1227	GO:0048812	neuron projection morphogenesis	0.0026	0.1176
O	1228	GO:0030048	actin filament-based movement	0.0026	0.1
O	1229	GO:0048598	embryonic morphogenesis	0.0026	0.0769
O	1230	GO:0044802	single-organism membrane organization	0.0025	1.5
O	1231	GO:0032102	negative regulation of response to external stimulus	0.0025	0.75
O	1232	GO:0034702	ion channel complex	0.0025	0.4545
O	1233	GO:0017111	nucleoside-triphosphatase activity	0.0025	0.3
O	1234	GO:0009199	ribonucleoside triphosphate metabolic process	0.0025	0.2667
O	1235	GO:0002218	activation of innate immune response	0.0024	0.625
O	1236	GO:0005261	cation channel activity	0.0024	0.25
O	1237	GO:0071260	cellular response to mechanical stimulus	0.0024	0.2
O	1238	GO:0016830	carbon-carbon lyase activity	0.0024	0.1429
O	1239	GO:0090303	positive regulation of wound healing	0.0024	0.1111
O	1240	GO:0031970	organelle envelope lumen	0.0024	0.1
O	1241	GO:0005758	mitochondrial intermembrane space	0.0024	0.0714
O	1242	GO:1901652	response to peptide	0.0023	0.6667
O	1243	GO:0055086	nucleobase-containing small molecule metabolic process	0.0023	0.6
O	1244	GO:0044283	small molecule biosynthetic process	0.0023	0.6
O	1245	GO:0048193	Golgi vesicle transport	0.0023	0.5
O	1246	GO:0040007	growth	0.0023	0.3333
O	1247	GO:0006869	lipid transport	0.0023	0.3333
O	1248	GO:0050714	positive regulation of protein secretion	0.0023	0.2857
O	1249	GO:0006638	neutral lipid metabolic process	0.0023	0.2727
O	1250	GO:0005524	ATP binding	0.0022	1.3636
O	1251	GO:0016032	viral process	0.0022	0.6364
O	1252	GO:0006873	cellular ion homeostasis	0.0022	0.4286
O	1253	GO:0030888	regulation of B cell proliferation	0.0022	0.3333
O	1254	GO:0009141	nucleoside triphosphate metabolic process	0.0022	0.3
O	1255	GO:0015992	proton transport	0.0022	0.1875
O	1256	GO:0044236	multicellular organism metabolic process	0.0022	0.1818
O	1257	GO:0001501	skeletal system development	0.0022	0.1818
O	1258	GO:1903828	negative regulation of cellular protein localization	0.0022	0.1538
O	1259	GO:0050877	neurological system process	0.0021	0.9333
O	1260	GO:0016050	vesicle organization	0.0021	0.6
O	1261	GO:0048609	multicellular organismal reproductive process	0.0021	0.5
O	1262	GO:0046474	glycerophospholipid biosynthetic process	0.0021	0.4167
O	1263	GO:0005496	steroid binding	0.0021	0.4
O	1264	GO:0045471	response to ethanol	0.0021	0.3333
O	1265	GO:0010595	positive regulation of endothelial cell migration	0.0021	0.3333
O	1266	GO:0007049	cell cycle	0.0021	0.3333
O	1267	GO:0060759	regulation of response to cytokine stimulus	0.0021	0.25
O	1268	GO:0002690	positive regulation of leukocyte chemotaxis	0.0021	0.25
O	1269	GO:0042613	MHC class II protein complex	0.0021	0.1667
O	1270	GO:0032648	regulation of interferon-beta production	0.0021	0.1667
O	1271	GO:0033574	response to testosterone	0.0021	0.1429
O	1272	GO:0051170	nuclear import	0.0021	0.125
O	1273	GO:0046823	negative regulation of nucleocytoplasmic transport	0.0021	0.125
O	1274	GO:0008081	phosphoric diester hydrolase activity	0.0021	0.125
O	1275	GO:0009891	positive regulation of biosynthetic process	0.002	2.4444
O	1276	GO:0001959	regulation of cytokine-mediated signaling pathway	0.002	1
O	1277	GO:0005730	nucleolus	0.002	0.6957
O	1278	GO:0006351	transcription, DNA-templated	0.002	0.6667
O	1279	GO:0016757	transferase activity, transferring glycosyl groups	0.002	0.5
O	1280	GO:1905475	regulation of protein localization to membrane	0.002	0.4286
O	1281	GO:0009314	response to radiation	0.002	0.3478
O	1282	GO:1903708	positive regulation of hemopoiesis	0.002	0.2
O	1283	GO:0031960	response to corticosteroid	0.002	0.1667
O	1284	GO:0051302	regulation of cell division	0.002	0.1538
O	1285	GO:0002479	antigen processing and presentation of exogenous peptide antigen via MHC class I, TAP-dependent	0.002	0.1111
O	1286	GO:0051592	response to calcium ion	0.002	0.0833
O	1287	GO:0005544	calcium-dependent phospholipid binding	0.002	0.0833
O	1288	GO:0034220	ion transmembrane transport	0.0019	0.9333
O	1289	GO:0048208	COPII vesicle coating	0.0019	0.5
O	1290	GO:0031100	animal organ regeneration	0.0019	0.5
O	1291	GO:0030003	cellular cation homeostasis	0.0019	0.4667
O	1292	GO:0006888	ER to Golgi vesicle-mediated transport	0.0019	0.4
O	1293	GO:0010830	regulation of myotube differentiation	0.0019	0.3333
O	1294	GO:0008286	insulin receptor signaling pathway	0.0019	0.25
O	1295	GO:0018108	peptidyl-tyrosine phosphorylation	0.0019	0.2222
O	1296	GO:0071478	cellular response to radiation	0.0019	0.0909
O	1297	GO:0019955	cytokine binding	0.0019	0.0455
O	1298	GO:0002793	positive regulation of peptide secretion	0.0018	1
O	1299	GO:0030554	adenyl nucleotide binding	0.0018	0.9524
O	1300	GO:0051222	positive regulation of protein transport	0.0018	0.8333
O	1301	GO:0033218	amide binding	0.0018	0.7143
O	1302	GO:0007610	behavior	0.0018	0.5556
O	1303	GO:0045089	positive regulation of innate immune response	0.0018	0.5
O	1304	GO:0044389	ubiquitin-like protein ligase binding	0.0018	0.3333
O	1305	GO:0043209	myelin sheath	0.0018	0.2857
O	1306	GO:0005743	mitochondrial inner membrane	0.0018	0.2857
O	1307	GO:0044272	sulfur compound biosynthetic process	0.0018	0.2727
O	1308	GO:1905477	positive regulation of protein localization to membrane	0.0018	0.2
O	1309	GO:0045787	positive regulation of cell cycle	0.0018	0.1429
O	1310	GO:0007584	response to nutrient	0.0018	0.125
O	1311	GO:0045893	positive regulation of transcription, DNA-templated	0.0017	1.75
O	1312	GO:0097659	nucleic acid-templated transcription	0.0017	0.6875
O	1313	GO:0006875	cellular metal ion homeostasis	0.0017	0.6667
O	1314	GO:0008202	steroid metabolic process	0.0017	0.4
O	1315	GO:0001525	angiogenesis	0.0017	0.4
O	1316	GO:0098660	inorganic ion transmembrane transport	0.0017	0.3846
O	1317	GO:0050679	positive regulation of epithelial cell proliferation	0.0017	0.3333
O	1318	GO:0009144	purine nucleoside triphosphate metabolic process	0.0017	0.25
O	1319	GO:0017038	protein import	0.0017	0.2222
O	1320	GO:0044325	ion channel binding	0.0017	0.1667
O	1321	GO:0035088	establishment or maintenance of apical/basal cell polarity	0.0017	0.1667
O	1322	GO:0051250	negative regulation of lymphocyte activation	0.0017	0.1429
O	1323	GO:1901879	regulation of protein depolymerization	0.0017	0.1
O	1324	GO:0031647	regulation of protein stability	0.0017	0.0769
O	1325	GO:0042246	tissue regeneration	0.0017	0.0714
O	1326	GO:0060761	negative regulation of response to cytokine stimulus	0.0016	1
O	1327	GO:0032870	cellular response to hormone stimulus	0.0016	0.8
O	1328	GO:0018193	peptidyl-amino acid modification	0.0016	0.7778
O	1329	GO:0016070	RNA metabolic process	0.0016	0.45
O	1330	GO:1903364	positive regulation of cellular protein catabolic process	0.0016	0.4
O	1331	GO:0090304	nucleic acid metabolic process	0.0016	0.3846
O	1332	GO:0006913	nucleocytoplasmic transport	0.0016	0.375
O	1333	GO:0033673	negative regulation of kinase activity	0.0016	0.3333
O	1334	GO:0099503	secretory vesicle	0.0016	0.25
O	1335	GO:0032956	regulation of actin cytoskeleton organization	0.0016	0.2222
O	1336	GO:0010565	regulation of cellular ketone metabolic process	0.0016	0.125
O	1337	GO:0006805	xenobiotic metabolic process	0.0016	0.1111
O	1338	GO:0006818	hydrogen transport	0.0016	0.1053
O	1339	GO:0044431	Golgi apparatus part	0.0015	0.9231
O	1340	GO:0009615	response to virus	0.0015	0.6667
O	1341	GO:0002250	adaptive immune response	0.0015	0.6
O	1342	GO:0046982	protein heterodimerization activity	0.0015	0.4444
O	1343	GO:0019001	guanyl nucleotide binding	0.0015	0.4091
O	1344	GO:0051169	nuclear transport	0.0015	0.3333
O	1345	GO:0010821	regulation of mitochondrion organization	0.0015	0.3333
O	1346	GO:0002718	regulation of cytokine production involved in immune response	0.0015	0.3333
O	1347	GO:0007283	spermatogenesis	0.0015	0.3125
O	1348	GO:0032409	regulation of transporter activity	0.0015	0.2857
O	1349	GO:0032588	trans-Golgi network membrane	0.0015	0.25
O	1350	GO:0045807	positive regulation of endocytosis	0.0015	0.2222
O	1351	GO:0051155	positive regulation of striated muscle cell differentiation	0.0015	0.125
O	1352	GO:0047485	protein N-terminus binding	0.0015	0.125
O	1353	GO:0030669	clathrin-coated endocytic vesicle membrane	0.0015	0.1111
O	1354	GO:0043197	dendritic spine	0.0015	0.0769
O	1355	GO:0050848	regulation of calcium-mediated signaling	0.0014	0.5
O	1356	GO:0006970	response to osmotic stress	0.0014	0.5
O	1357	GO:0019905	syntaxin binding	0.0014	0.3333
O	1358	GO:0071902	positive regulation of protein serine/threonine kinase activity	0.0014	0.2857
O	1359	GO:0048232	male gamete generation	0.0014	0.2857
O	1360	GO:0008064	regulation of actin polymerization or depolymerization	0.0014	0.25
O	1361	GO:0051348	negative regulation of transferase activity	0.0014	0.2
O	1362	GO:0045860	positive regulation of protein kinase activity	0.0013	0.75
O	1363	GO:0032869	cellular response to insulin stimulus	0.0013	0.3333
O	1364	GO:0032434	regulation of proteasomal ubiquitin-dependent protein catabolic process	0.0013	0.3333
O	1365	GO:0022604	regulation of cell morphogenesis	0.0013	0.25
O	1366	GO:0022832	voltage-gated channel activity	0.0013	0.1333
O	1367	GO:0030136	clathrin-coated vesicle	0.0013	0.125
O	1368	GO:0043434	response to peptide hormone	0.0012	0.5
O	1369	GO:0019438	aromatic compound biosynthetic process	0.0012	0.4
O	1370	GO:0097305	response to alcohol	0.0012	0.3333
O	1371	GO:0043281	regulation of cysteine-type endopeptidase activity involved in apoptotic process	0.0012	0.2857
O	1372	GO:0008203	cholesterol metabolic process	0.0012	0.25
O	1373	GO:0005085	guanyl-nucleotide exchange factor activity	0.0012	0.2381
O	1374	GO:1902107	positive regulation of leukocyte differentiation	0.0012	0.2
O	1375	GO:0042306	regulation of protein import into nucleus	0.0012	0.2
O	1376	GO:0010952	positive regulation of peptidase activity	0.0012	0.1667
O	1377	GO:0017016	Ras GTPase binding	0.0012	0.1538
O	1378	GO:0034767	positive regulation of ion transmembrane transport	0.0012	0.125
O	1379	GO:0016798	hydrolase activity, acting on glycosyl bonds	0.0012	0.1111
O	1380	GO:0050954	sensory perception of mechanical stimulus	0.0012	0.1
O	1381	GO:0030662	coated vesicle membrane	0.0012	0.0833
O	1382	GO:1902593	single-organism nuclear import	0.0012	0.0769
O	1383	GO:0048858	cell projection morphogenesis	0.0012	0.0714
O	1384	GO:0070727	cellular macromolecule localization	0.0011	0.9091
O	1385	GO:0019866	organelle inner membrane	0.0011	0.5556
O	1386	GO:1902903	regulation of supramolecular fiber organization	0.0011	0.4
O	1387	GO:1902580	single-organism cellular localization	0.0011	0.3636
O	1388	GO:1902930	regulation of alcohol biosynthetic process	0.0011	0.3333
O	1389	GO:0009617	response to bacterium	0.0011	0.3333
O	1390	GO:0044242	cellular lipid catabolic process	0.0011	0.2857
O	1391	GO:0051172	negative regulation of nitrogen compound metabolic process	0.0011	0.2667
O	1392	GO:0043279	response to alkaloid	0.0011	0.2
O	1393	GO:0045444	fat cell differentiation	0.0011	0.1667
O	1394	GO:2000116	regulation of cysteine-type endopeptidase activity	0.0011	0.125
O	1395	GO:0010558	negative regulation of macromolecule biosynthetic process	0.001	0.9167
O	1396	GO:2000113	negative regulation of cellular macromolecule biosynthetic process	0.001	0.5
O	1397	GO:0051251	positive regulation of lymphocyte activation	0.001	0.5
O	1398	GO:0045862	positive regulation of proteolysis	0.001	0.5
O	1399	GO:1903507	negative regulation of nucleic acid-templated transcription	0.001	0.3889
O	1400	GO:0030425	dendrite	0.001	0.3333
O	1401	GO:0019904	protein domain specific binding	0.001	0.3333
O	1402	GO:0008016	regulation of heart contraction	0.001	0.2857
O	1403	GO:0042176	regulation of protein catabolic process	0.001	0.2727
O	1404	GO:0048729	tissue morphogenesis	0.001	0.25
O	1405	GO:0007276	gamete generation	0.001	0.25
O	1406	GO:0051015	actin filament binding	0.001	0.2222
O	1407	GO:0036294	cellular response to decreased oxygen levels	0.001	0.2
O	1408	GO:0051091	positive regulation of sequence-specific DNA binding transcription factor activity	0.001	0.1667
O	1409	GO:0061134	peptidase regulator activity	0.001	0.1429
O	1410	GO:0044706	multi-multicellular organism process	0.001	0.1429
O	1411	GO:0006821	chloride transport	0.001	0.1429
O	1412	GO:0098662	inorganic cation transmembrane transport	0.001	0.1
O	1413	GO:0006898	receptor-mediated endocytosis	0.001	0.1
O	1414	GO:0009055	electron carrier activity	0.001	0.0833
O	1415	GO:0048562	embryonic organ morphogenesis	0.001	0.0714
O	1416	GO:0051338	regulation of transferase activity	0.0009	1.4
O	1417	GO:0044271	cellular nitrogen compound biosynthetic process	0.0009	1
O	1418	GO:0055074	calcium ion homeostasis	0.0009	0.75
O	1419	GO:0010563	negative regulation of phosphorus metabolic process	0.0009	0.7143
O	1420	GO:0071229	cellular response to acid chemical	0.0009	0.6
O	1421	GO:0070663	regulation of leukocyte proliferation	0.0009	0.5
O	1422	GO:0006874	cellular calcium ion homeostasis	0.0009	0.4
O	1423	GO:0030141	secretory granule	0.0009	0.3333
O	1424	GO:0030139	endocytic vesicle	0.0009	0.3333
O	1425	GO:0016197	endosomal transport	0.0009	0.2857
O	1426	GO:1900182	positive regulation of protein localization to nucleus	0.0009	0.25
O	1427	GO:0018212	peptidyl-tyrosine modification	0.0009	0.25
O	1428	GO:0002223	stimulatory C-type lectin receptor signaling pathway	0.0009	0.25
O	1429	GO:0032868	response to insulin	0.0009	0.2
O	1430	GO:0022412	cellular process involved in reproduction in multicellular organism	0.0009	0.2
O	1431	GO:0032355	response to estradiol	0.0009	0.1667
O	1432	GO:0031227	intrinsic component of endoplasmic reticulum membrane	0.0009	0.1667
O	1433	GO:0022836	gated channel activity	0.0009	0.1667
O	1434	GO:0009259	ribonucleotide metabolic process	0.0009	0.1667
O	1435	GO:0031348	negative regulation of defense response	0.0009	0.1429
O	1436	GO:0031253	cell projection membrane	0.0009	0.1429
O	1437	GO:1901990	regulation of mitotic cell cycle phase transition	0.0009	0.1111
O	1438	GO:1901657	glycosyl compound metabolic process	0.0009	0.1111
O	1439	GO:0044724	single-organism carbohydrate catabolic process	0.0009	0.1
O	1440	GO:0099572	postsynaptic specialization	0.0009	0.0476
O	1441	GO:1903508	positive regulation of nucleic acid-templated transcription	0.0008	1.1111
O	1442	GO:0034654	nucleobase-containing compound biosynthetic process	0.0008	1
O	1443	GO:0031327	negative regulation of cellular biosynthetic process	0.0008	0.6154
O	1444	GO:0031400	negative regulation of protein modification process	0.0008	0.6
O	1445	GO:0010629	negative regulation of gene expression	0.0008	0.5455
O	1446	GO:0072507	divalent inorganic cation homeostasis	0.0008	0.5
O	1447	GO:0010594	regulation of endothelial cell migration	0.0008	0.5
O	1448	GO:0051603	proteolysis involved in cellular protein catabolic process	0.0008	0.4286
O	1449	GO:0031267	small GTPase binding	0.0008	0.375
O	1450	GO:0032147	activation of protein kinase activity	0.0008	0.3333
O	1451	GO:0006605	protein targeting	0.0008	0.3333
O	1452	GO:0007600	sensory perception	0.0008	0.3
O	1453	GO:0072659	protein localization to plasma membrane	0.0008	0.25
O	1454	GO:0043433	negative regulation of sequence-specific DNA binding transcription factor activity	0.0008	0.2
O	1455	GO:0001505	regulation of neurotransmitter levels	0.0008	0.2
O	1456	GO:0007275	multicellular organism development	0.0008	0.1818
O	1457	GO:0002220	innate immune response activating cell surface receptor signaling pathway	0.0008	0.1667
O	1458	GO:0004867	serine-type endopeptidase inhibitor activity	0.0008	0.125
O	1459	GO:0010720	positive regulation of cell development	0.0008	0.0909
O	1460	GO:0009059	macromolecule biosynthetic process	0.0007	0.5714
O	1461	GO:0060326	cell chemotaxis	0.0007	0.5
O	1462	GO:0051924	regulation of calcium ion transport	0.0007	0.5
O	1463	GO:0031256	leading edge membrane	0.0007	0.5
O	1464	GO:0010942	positive regulation of cell death	0.0007	0.5
O	1465	GO:0006140	regulation of nucleotide metabolic process	0.0007	0.5
O	1466	GO:0090276	regulation of peptide hormone secretion	0.0007	0.25
O	1467	GO:0050769	positive regulation of neurogenesis	0.0007	0.2
O	1468	GO:0048534	hematopoietic or lymphoid organ development	0.0007	0.1667
O	1469	GO:0046777	protein autophosphorylation	0.0007	0.1429
O	1470	GO:0009205	purine ribonucleoside triphosphate metabolic process	0.0007	0.1429
O	1471	GO:0007507	heart development	0.0007	0.1429
O	1472	GO:0033157	regulation of intracellular protein transport	0.0007	0.125
O	1473	GO:0007346	regulation of mitotic cell cycle	0.0007	0.125
O	1474	GO:0009064	glutamine family amino acid metabolic process	0.0007	0.1111
O	1475	GO:0043025	neuronal cell body	0.0007	0.0769
O	1476	GO:0010639	negative regulation of organelle organization	0.0007	0.0769
O	1477	GO:0005201	extracellular matrix structural constituent	0.0007	0.0455
O	1478	GO:1903050	regulation of proteolysis involved in cellular protein catabolic process	0.0006	1
O	1479	GO:1901796	regulation of signal transduction by p53 class mediator	0.0006	1
O	1480	GO:0010557	positive regulation of macromolecule biosynthetic process	0.0006	0.875
O	1481	GO:0023014	signal transduction by protein phosphorylation	0.0006	0.4
O	1482	GO:0030308	negative regulation of cell growth	0.0006	0.3333
O	1483	GO:0000165	MAPK cascade	0.0006	0.3333
O	1484	GO:0007204	positive regulation of cytosolic calcium ion concentration	0.0006	0.25
O	1485	GO:0005815	microtubule organizing center	0.0006	0.2
O	1486	GO:0005244	voltage-gated ion channel activity	0.0006	0.2
O	1487	GO:1901653	cellular response to peptide	0.0006	0.125
O	1488	GO:0015698	inorganic anion transport	0.0006	0.125
O	1489	GO:0070925	organelle assembly	0.0006	0.1111
O	1490	GO:0030424	axon	0.0006	0.1
O	1491	GO:0043177	organic acid binding	0.0006	0.0909
O	1492	GO:0007009	plasma membrane organization	0.0006	0.0714
O	1493	GO:0097060	synaptic membrane	0.0006	0.0667
O	1494	GO:0046822	regulation of nucleocytoplasmic transport	0.0005	0.3333
O	1495	GO:0022402	cell cycle process	0.0005	0.3077
O	1496	GO:0008134	transcription factor binding	0.0005	0.1429
O	1497	GO:0030695	GTPase regulator activity	0.0005	0.1304
O	1498	GO:0022804	active transmembrane transporter activity	0.0005	0.1176
O	1499	GO:0090068	positive regulation of cell cycle process	0.0005	0.1
O	1500	GO:0050662	coenzyme binding	0.0005	0.1
O	1501	GO:0004713	protein tyrosine kinase activity	0.0005	0.1
O	1502	GO:0032989	cellular component morphogenesis	0.0005	0.0556
O	1503	GO:2001233	regulation of apoptotic signaling pathway	0.0004	0.5
O	1504	GO:0000187	activation of MAPK activity	0.0004	0.5
O	1505	GO:0032388	positive regulation of intracellular transport	0.0004	0.3333
O	1506	GO:0051253	negative regulation of RNA metabolic process	0.0004	0.2353
O	1507	GO:0000226	microtubule cytoskeleton organization	0.0004	0.2
O	1508	GO:0003006	developmental process involved in reproduction	0.0004	0.1538
O	1509	GO:1903522	regulation of blood circulation	0.0004	0.1429
O	1510	GO:0048638	regulation of developmental growth	0.0004	0.1429
O	1511	GO:0044403	symbiosis, encompassing mutualism through parasitism	0.0004	0.1333
O	1512	GO:0050792	regulation of viral process	0.0004	0.125
O	1513	GO:0098656	anion transmembrane transport	0.0004	0.1111
O	1514	GO:0032990	cell part morphogenesis	0.0004	0.1
O	1515	GO:0005096	GTPase activator activity	0.0004	0.1
O	1516	GO:0060589	nucleoside-triphosphatase regulator activity	0.0004	0.08
O	1517	GO:0045936	negative regulation of phosphate metabolic process	0.0003	0.3333
O	1518	GO:0050900	leukocyte migration	0.0003	0.2
O	1519	GO:0048646	anatomical structure formation involved in morphogenesis	0.0003	0.2
O	1520	GO:0042391	regulation of membrane potential	0.0003	0.1667
O	1521	GO:0006974	cellular response to DNA damage stimulus	0.0003	0.1667
O	1522	GO:0071363	cellular response to growth factor stimulus	0.0003	0.1429
O	1523	GO:0051186	cofactor metabolic process	0.0003	0.125
O	1524	GO:0031625	ubiquitin protein ligase binding	0.0003	0.125
O	1525	GO:0016817	hydrolase activity, acting on acid anhydrides	0.0003	0.125
O	1526	GO:0031333	negative regulation of protein complex assembly	0.0003	0.1111
O	1527	GO:0016071	mRNA metabolic process	0.0003	0.0952
O	1528	GO:0005882	intermediate filament	0.0003	0.0769
O	1529	GO:0000981	RNA polymerase II transcription factor activity, sequence-specific DNA binding	0.0002	0.5
O	1530	GO:0001101	response to acid chemical	0.0002	0.3333
O	1531	GO:0001933	negative regulation of protein phosphorylation	0.0002	0.25
O	1532	GO:0006820	anion transport	0.0002	0.2
O	1533	GO:0009117	nucleotide metabolic process	0.0002	0.1667
O	1534	GO:0001067	regulatory region nucleic acid binding	0.0001	0.5
O	1535	GO:0003690	double-stranded DNA binding	0.0001	0.3333
O	1536	GO:0098655	cation transmembrane transport	0.0001	0.2
O	1537	GO:0006753	nucleoside phosphate metabolic process	0.0001	0.1667
O	1538	GO:2001275	positive regulation of glucose import in response to insulin stimulus	0	0
O	1539	GO:2001273	regulation of glucose import in response to insulin stimulus	0	0
O	1540	GO:2001259	positive regulation of cation channel activity	0	0
O	1541	GO:2001257	regulation of cation channel activity	0	0
O	1542	GO:2001252	positive regulation of chromosome organization	0	0
O	1543	GO:2001242	regulation of intrinsic apoptotic signaling pathway	0	0
O	1544	GO:2001236	regulation of extrinsic apoptotic signaling pathway	0	0
O	1545	GO:2001204	regulation of osteoclast development	0	0
O	1546	GO:2001057	reactive nitrogen species metabolic process	0	0
O	1547	GO:2001056	positive regulation of cysteine-type endopeptidase activity	0	0
O	1548	GO:2001021	negative regulation of response to DNA damage stimulus	0	0
O	1549	GO:2000846	regulation of corticosteroid hormone secretion	0	0
O	1550	GO:2000786	positive regulation of autophagosome assembly	0	0
O	1551	GO:2000785	regulation of autophagosome assembly	0	0
O	1552	GO:2000737	negative regulation of stem cell differentiation	0	0
O	1553	GO:2000736	regulation of stem cell differentiation	0	0
O	1554	GO:2000649	regulation of sodium ion transmembrane transporter activity	0	0
O	1555	GO:2000648	positive regulation of stem cell proliferation	0	0
O	1556	GO:2000641	regulation of early endosome to late endosome transport	0	0
O	1557	GO:2000516	positive regulation of CD4-positive, alpha-beta T cell activation	0	0
O	1558	GO:2000515	negative regulation of CD4-positive, alpha-beta T cell activation	0	0
O	1559	GO:2000514	regulation of CD4-positive, alpha-beta T cell activation	0	0
O	1560	GO:2000482	regulation of interleukin-8 secretion	0	0
O	1561	GO:2000406	positive regulation of T cell migration	0	0
O	1562	GO:2000403	positive regulation of lymphocyte migration	0	0
O	1563	GO:2000401	regulation of lymphocyte migration	0	0
O	1564	GO:2000378	negative regulation of reactive oxygen species metabolic process	0	0
O	1565	GO:2000352	negative regulation of endothelial cell apoptotic process	0	0
O	1566	GO:2000351	regulation of endothelial cell apoptotic process	0	0
O	1567	GO:2000242	negative regulation of reproductive process	0	0
O	1568	GO:2000241	regulation of reproductive process	0	0
O	1569	GO:2000181	negative regulation of blood vessel morphogenesis	0	0
O	1570	GO:2000134	negative regulation of G1/S transition of mitotic cell cycle	0	0
O	1571	GO:2000107	negative regulation of leukocyte apoptotic process	0	0
O	1572	GO:2000106	regulation of leukocyte apoptotic process	0	0
O	1573	GO:2000045	regulation of G1/S transition of mitotic cell cycle	0	0
O	1574	GO:1990904	ribonucleoprotein complex	0	0
O	1575	GO:1990837	sequence-specific double-stranded DNA binding	0	0
O	1576	GO:1990782	protein tyrosine kinase binding	0	0
O	1577	GO:1990778	protein localization to cell periphery	0	0
O	1578	GO:1990777	lipoprotein particle	0	0
O	1579	GO:1990748	cellular detoxification	0	0
O	1580	GO:1990266	neutrophil migration	0	0
O	1581	GO:1990234	transferase complex	0	0
O	1582	GO:1990204	oxidoreductase complex	0	0
O	1583	GO:1905954	positive regulation of lipid localization	0	0
O	1584	GO:1905953	negative regulation of lipid localization	0	0
O	1585	GO:1905898	positive regulation of response to endoplasmic reticulum stress	0	0
O	1586	GO:1905897	regulation of response to endoplasmic reticulum stress	0	0
O	1587	GO:1905523	positive regulation of macrophage migration	0	0
O	1588	GO:1905521	regulation of macrophage migration	0	0
O	1589	GO:1905517	macrophage migration	0	0
O	1590	GO:1905476	negative regulation of protein localization to membrane	0	0
O	1591	GO:1905368	peptidase complex	0	0
O	1592	GO:1905354	exoribonuclease complex	0	0
O	1593	GO:1905269	positive regulation of chromatin organization	0	0
O	1594	GO:1904949	ATPase complex	0	0
O	1595	GO:1904894	positive regulation of STAT cascade	0	0
O	1596	GO:1904892	regulation of STAT cascade	0	0
O	1597	GO:1904707	positive regulation of vascular smooth muscle cell proliferation	0	0
O	1598	GO:1904705	regulation of vascular smooth muscle cell proliferation	0	0
O	1599	GO:1904680	peptide transmembrane transporter activity	0	0
O	1600	GO:1904591	positive regulation of protein import	0	0
O	1601	GO:1904407	positive regulation of nitric oxide metabolic process	0	0
O	1602	GO:1904376	negative regulation of protein localization to cell periphery	0	0
O	1603	GO:1904294	positive regulation of ERAD pathway	0	0
O	1604	GO:1904292	regulation of ERAD pathway	0	0
O	1605	GO:1904181	positive regulation of membrane depolarization	0	0
O	1606	GO:1904064	positive regulation of cation transmembrane transport	0	0
O	1607	GO:1904062	regulation of cation transmembrane transport	0	0
O	1608	GO:1904036	negative regulation of epithelial cell apoptotic process	0	0
O	1609	GO:1904035	regulation of epithelial cell apoptotic process	0	0
O	1610	GO:1903901	negative regulation of viral life cycle	0	0
O	1611	GO:1903900	regulation of viral life cycle	0	0
O	1612	GO:1903793	positive regulation of anion transport	0	0
O	1613	GO:1903779	regulation of cardiac conduction	0	0
O	1614	GO:1903747	regulation of establishment of protein localization to mitochondrion	0	0
O	1615	GO:1903651	positive regulation of cytoplasmic transport	0	0
O	1616	GO:1903649	regulation of cytoplasmic transport	0	0
O	1617	GO:1903579	negative regulation of ATP metabolic process	0	0
O	1618	GO:1903578	regulation of ATP metabolic process	0	0
O	1619	GO:1903427	negative regulation of reactive oxygen species biosynthetic process	0	0
O	1620	GO:1903426	regulation of reactive oxygen species biosynthetic process	0	0
O	1621	GO:1903409	reactive oxygen species biosynthetic process	0	0
O	1622	GO:1903392	negative regulation of adherens junction organization	0	0
O	1623	GO:1903391	regulation of adherens junction organization	0	0
O	1624	GO:1903362	regulation of cellular protein catabolic process	0	0
O	1625	GO:1903321	negative regulation of protein modification by small protein conjugation or removal	0	0
O	1626	GO:1903319	positive regulation of protein maturation	0	0
O	1627	GO:1903318	negative regulation of protein maturation	0	0
O	1628	GO:1903313	positive regulation of mRNA metabolic process	0	0
O	1629	GO:1903311	regulation of mRNA metabolic process	0	0
O	1630	GO:1903307	positive regulation of regulated secretory pathway	0	0
O	1631	GO:1903305	regulation of regulated secretory pathway	0	0
O	1632	GO:1903214	regulation of protein targeting to mitochondrion	0	0
O	1633	GO:1903206	negative regulation of hydrogen peroxide-induced cell death	0	0
O	1634	GO:1903205	regulation of hydrogen peroxide-induced cell death	0	0
O	1635	GO:1903202	negative regulation of oxidative stress-induced cell death	0	0
O	1636	GO:1903201	regulation of oxidative stress-induced cell death	0	0
O	1637	GO:1903131	mononuclear cell differentiation	0	0
O	1638	GO:1903077	negative regulation of protein localization to plasma membrane	0	0
O	1639	GO:1903055	positive regulation of extracellular matrix organization	0	0
O	1640	GO:1903052	positive regulation of proteolysis involved in cellular protein catabolic process	0	0
O	1641	GO:1903047	mitotic cell cycle process	0	0
O	1642	GO:1903036	positive regulation of response to wounding	0	0
O	1643	GO:1903035	negative regulation of response to wounding	0	0
O	1644	GO:1902991	regulation of amyloid precursor protein catabolic process	0	0
O	1645	GO:1902936	phosphatidylinositol bisphosphate binding	0	0
O	1646	GO:1902932	positive regulation of alcohol biosynthetic process	0	0
O	1647	GO:1902905	positive regulation of supramolecular fiber organization	0	0
O	1648	GO:1902904	negative regulation of supramolecular fiber organization	0	0
O	1649	GO:1902883	negative regulation of response to oxidative stress	0	0
O	1650	GO:1902882	regulation of response to oxidative stress	0	0
O	1651	GO:1902850	microtubule cytoskeleton organization involved in mitosis	0	0
O	1652	GO:1902808	positive regulation of cell cycle G1/S phase transition	0	0
O	1653	GO:1902807	negative regulation of cell cycle G1/S phase transition	0	0
O	1654	GO:1902806	regulation of cell cycle G1/S phase transition	0	0
O	1655	GO:1902742	apoptotic process involved in development	0	0
O	1656	GO:1902652	secondary alcohol metabolic process	0	0
O	1657	GO:1902624	positive regulation of neutrophil migration	0	0
O	1658	GO:1902622	regulation of neutrophil migration	0	0
O	1659	GO:1902476	chloride transmembrane transport	0	0
O	1660	GO:1902307	positive regulation of sodium ion transmembrane transport	0	0
O	1661	GO:1902305	regulation of sodium ion transmembrane transport	0	0
O	1662	GO:1902275	regulation of chromatin organization	0	0
O	1663	GO:1902254	negative regulation of intrinsic apoptotic signaling pathway by p53 class mediator	0	0
O	1664	GO:1902222	erythrose 4-phosphate/phosphoenolpyruvate family amino acid catabolic process	0	0
O	1665	GO:1902221	erythrose 4-phosphate/phosphoenolpyruvate family amino acid metabolic process	0	0
O	1666	GO:1902176	negative regulation of oxidative stress-induced intrinsic apoptotic signaling pathway	0	0
O	1667	GO:1902175	regulation of oxidative stress-induced intrinsic apoptotic signaling pathway	0	0
O	1668	GO:1902166	negative regulation of intrinsic apoptotic signaling pathway in response to DNA damage by p53 class mediator	0	0
O	1669	GO:1902003	regulation of beta-amyloid formation	0	0
O	1670	GO:1901998	toxin transport	0	0
O	1671	GO:1901992	positive regulation of mitotic cell cycle phase transition	0	0
O	1672	GO:1901989	positive regulation of cell cycle phase transition	0	0
O	1673	GO:1901988	negative regulation of cell cycle phase transition	0	0
O	1674	GO:1901987	regulation of cell cycle phase transition	0	0
O	1675	GO:1901981	phosphatidylinositol phosphate binding	0	0
O	1676	GO:1901976	regulation of cell cycle checkpoint	0	0
O	1677	GO:1901890	positive regulation of cell junction assembly	0	0
O	1678	GO:1901889	negative regulation of cell junction assembly	0	0
O	1679	GO:1901888	regulation of cell junction assembly	0	0
O	1680	GO:1901881	positive regulation of protein depolymerization	0	0
O	1681	GO:1901880	negative regulation of protein depolymerization	0	0
O	1682	GO:1901861	regulation of muscle tissue development	0	0
O	1683	GO:1901797	negative regulation of signal transduction by p53 class mediator	0	0
O	1684	GO:1901685	glutathione derivative metabolic process	0	0
O	1685	GO:1901658	glycosyl compound catabolic process	0	0
O	1686	GO:1901655	cellular response to ketone	0	0
O	1687	GO:1901616	organic hydroxy compound catabolic process	0	0
O	1688	GO:1901532	regulation of hematopoietic progenitor cell differentiation	0	0
O	1689	GO:1901522	positive regulation of transcription from RNA polymerase II promoter involved in cellular response to chemical stimulus	0	0
O	1690	GO:1901505	carbohydrate derivative transporter activity	0	0
O	1691	GO:1901264	carbohydrate derivative transport	0	0
O	1692	GO:1901224	positive regulation of NIK/NF-kappaB signaling	0	0
O	1693	GO:1901222	regulation of NIK/NF-kappaB signaling	0	0
O	1694	GO:1901215	negative regulation of neuron death	0	0
O	1695	GO:1901214	regulation of neuron death	0	0
O	1696	GO:1901201	regulation of extracellular matrix assembly	0	0
O	1697	GO:1901186	positive regulation of ERBB signaling pathway	0	0
O	1698	GO:1901137	carbohydrate derivative biosynthetic process	0	0
O	1699	GO:1901071	glucosamine-containing compound metabolic process	0	0
O	1700	GO:1901068	guanosine-containing compound metabolic process	0	0
O	1701	GO:1901032	negative regulation of response to reactive oxygen species	0	0
O	1702	GO:1901031	regulation of response to reactive oxygen species	0	0
O	1703	GO:1900750	oligopeptide binding	0	0
O	1704	GO:1900543	negative regulation of purine nucleotide metabolic process	0	0
O	1705	GO:1900424	regulation of defense response to bacterium	0	0
O	1706	GO:1900408	negative regulation of cellular response to oxidative stress	0	0
O	1707	GO:1900407	regulation of cellular response to oxidative stress	0	0
O	1708	GO:1900373	positive regulation of purine nucleotide biosynthetic process	0	0
O	1709	GO:1900274	regulation of phospholipase C activity	0	0
O	1710	GO:1900121	negative regulation of receptor binding	0	0
O	1711	GO:1900120	regulation of receptor binding	0	0
O	1712	GO:1900087	positive regulation of G1/S transition of mitotic cell cycle	0	0
O	1713	GO:1900078	positive regulation of cellular response to insulin stimulus	0	0
O	1714	GO:1900076	regulation of cellular response to insulin stimulus	0	0
O	1715	GO:1900047	negative regulation of hemostasis	0	0
O	1716	GO:1900015	regulation of cytokine production involved in inflammatory response	0	0
O	1717	GO:0099568	cytoplasmic region	0	0
O	1718	GO:0099537	trans-synaptic signaling	0	0
O	1719	GO:0099536	synaptic signaling	0	0
O	1720	GO:0099111	microtubule-based transport	0	0
O	1721	GO:0099094	ligand-gated cation channel activity	0	0
O	1722	GO:0098916	anterograde trans-synaptic signaling	0	0
O	1723	GO:0098869	cellular oxidant detoxification	0	0
O	1724	GO:0098862	cluster of actin-based cell projections	0	0
O	1725	GO:0098801	regulation of renal system process	0	0
O	1726	GO:0098794	postsynapse	0	0
O	1727	GO:0098793	presynapse	0	0
O	1728	GO:0098754	detoxification	0	0
O	1729	GO:0098751	bone cell development	0	0
O	1730	GO:0098742	cell-cell adhesion via plasma-membrane adhesion molecules	0	0
O	1731	GO:0098687	chromosomal region	0	0
O	1732	GO:0098661	inorganic anion transmembrane transport	0	0
O	1733	GO:0098657	import into cell	0	0
O	1734	GO:0098641	cadherin binding involved in cell-cell adhesion	0	0
O	1735	GO:0098632	protein binding involved in cell-cell adhesion	0	0
O	1736	GO:0098631	protein binding involved in cell adhesion	0	0
O	1737	GO:0098581	detection of external biotic stimulus	0	0
O	1738	GO:0098562	cytoplasmic side of membrane	0	0
O	1739	GO:0098533	ATPase dependent transmembrane transport complex	0	0
O	1740	GO:0098531	transcription factor activity, direct ligand regulated sequence-specific DNA binding	0	0
O	1741	GO:0097610	cell surface furrow	0	0
O	1742	GO:0097553	calcium ion transmembrane import into cytosol	0	0
O	1743	GO:0097517	contractile actin filament bundle	0	0
O	1744	GO:0097485	neuron projection guidance	0	0
O	1745	GO:0097386	glial cell projection	0	0
O	1746	GO:0097352	autophagosome maturation	0	0
O	1747	GO:0097306	cellular response to alcohol	0	0
O	1748	GO:0097200	cysteine-type endopeptidase activity involved in execution phase of apoptosis	0	0
O	1749	GO:0097194	execution phase of apoptosis	0	0
O	1750	GO:0097191	extrinsic apoptotic signaling pathway	0	0
O	1751	GO:0097153	cysteine-type endopeptidase activity involved in apoptotic process	0	0
O	1752	GO:0097067	cellular response to thyroid hormone stimulus	0	0
O	1753	GO:0097035	regulation of membrane lipid distribution	0	0
O	1754	GO:0097028	dendritic cell differentiation	0	0
O	1755	GO:0090665	glycoprotein complex	0	0
O	1756	GO:0090533	cation-transporting ATPase complex	0	0
O	1757	GO:0090502	RNA phosphodiester bond hydrolysis, endonucleolytic	0	0
O	1758	GO:0090501	RNA phosphodiester bond hydrolysis	0	0
O	1759	GO:0090317	negative regulation of intracellular protein transport	0	0
O	1760	GO:0090312	positive regulation of protein deacetylation	0	0
O	1761	GO:0090311	regulation of protein deacetylation	0	0
O	1762	GO:0090305	nucleic acid phosphodiester bond hydrolysis	0	0
O	1763	GO:0090280	positive regulation of calcium ion import	0	0
O	1764	GO:0090278	negative regulation of peptide hormone secretion	0	0
O	1765	GO:0090257	regulation of muscle system process	0	0
O	1766	GO:0090231	regulation of spindle checkpoint	0	0
O	1767	GO:0090208	positive regulation of triglyceride metabolic process	0	0
O	1768	GO:0090207	regulation of triglyceride metabolic process	0	0
O	1769	GO:0090197	positive regulation of chemokine secretion	0	0
O	1770	GO:0090190	positive regulation of branching involved in ureteric bud morphogenesis	0	0
O	1771	GO:0090189	regulation of branching involved in ureteric bud morphogenesis	0	0
O	1772	GO:0090184	positive regulation of kidney development	0	0
O	1773	GO:0090183	regulation of kidney development	0	0
O	1774	GO:0090181	regulation of cholesterol metabolic process	0	0
O	1775	GO:0090162	establishment of epithelial cell polarity	0	0
O	1776	GO:0090136	epithelial cell-cell adhesion	0	0
O	1777	GO:0090109	regulation of cell-substrate junction assembly	0	0
O	1778	GO:0090026	positive regulation of monocyte chemotaxis	0	0
O	1779	GO:0090025	regulation of monocyte chemotaxis	0	0
O	1780	GO:0090023	positive regulation of neutrophil chemotaxis	0	0
O	1781	GO:0090005	negative regulation of establishment of protein localization to plasma membrane	0	0
O	1782	GO:0090004	positive regulation of establishment of protein localization to plasma membrane	0	0
O	1783	GO:0085029	extracellular matrix assembly	0	0
O	1784	GO:0072686	mitotic spindle	0	0
O	1785	GO:0072677	eosinophil migration	0	0
O	1786	GO:0072666	establishment of protein localization to vacuole	0	0
O	1787	GO:0072665	protein localization to vacuole	0	0
O	1788	GO:0072595	maintenance of protein localization in organelle	0	0
O	1789	GO:0072529	pyrimidine-containing compound catabolic process	0	0
O	1790	GO:0072527	pyrimidine-containing compound metabolic process	0	0
O	1791	GO:0072524	pyridine-containing compound metabolic process	0	0
O	1792	GO:0072521	purine-containing compound metabolic process	0	0
O	1793	GO:0072512	trivalent inorganic cation transport	0	0
O	1794	GO:0072503	cellular divalent inorganic cation homeostasis	0	0
O	1795	GO:0072384	organelle transport along microtubule	0	0
O	1796	GO:0072350	tricarboxylic acid metabolic process	0	0
O	1797	GO:0072331	signal transduction by p53 class mediator	0	0
O	1798	GO:0072330	monocarboxylic acid biosynthetic process	0	0
O	1799	GO:0071901	negative regulation of protein serine/threonine kinase activity	0	0
O	1800	GO:0071827	plasma lipoprotein particle organization	0	0
O	1801	GO:0071826	ribonucleoprotein complex subunit organization	0	0
O	1802	GO:0071805	potassium ion transmembrane transport	0	0
O	1803	GO:0071804	cellular potassium ion transport	0	0
O	1804	GO:0071774	response to fibroblast growth factor	0	0
O	1805	GO:0071711	basement membrane organization	0	0
O	1806	GO:0071677	positive regulation of mononuclear cell migration	0	0
O	1807	GO:0071674	mononuclear cell migration	0	0
O	1808	GO:0071624	positive regulation of granulocyte chemotaxis	0	0
O	1809	GO:0071622	regulation of granulocyte chemotaxis	0	0
O	1810	GO:0071556	integral component of lumenal side of endoplasmic reticulum membrane	0	0
O	1811	GO:0071498	cellular response to fluid shear stress	0	0
O	1812	GO:0071480	cellular response to gamma radiation	0	0
O	1813	GO:0071479	cellular response to ionizing radiation	0	0
O	1814	GO:0071470	cellular response to osmotic stress	0	0
O	1815	GO:0071467	cellular response to pH	0	0
O	1816	GO:0071456	cellular response to hypoxia	0	0
O	1817	GO:0071453	cellular response to oxygen levels	0	0
O	1818	GO:0071398	cellular response to fatty acid	0	0
O	1819	GO:0071397	cellular response to cholesterol	0	0
O	1820	GO:0071384	cellular response to corticosteroid stimulus	0	0
O	1821	GO:0071375	cellular response to peptide hormone stimulus	0	0
O	1822	GO:0071364	cellular response to epidermal growth factor stimulus	0	0
O	1823	GO:0071360	cellular response to exogenous dsRNA	0	0
O	1824	GO:0071347	cellular response to interleukin-1	0	0
O	1825	GO:0071326	cellular response to monosaccharide stimulus	0	0
O	1826	GO:0071322	cellular response to carbohydrate stimulus	0	0
O	1827	GO:0071277	cellular response to calcium ion	0	0
O	1828	GO:0071242	cellular response to ammonium ion	0	0
O	1829	GO:0071230	cellular response to amino acid stimulus	0	0
O	1830	GO:0070997	neuron death	0	0
O	1831	GO:0070938	contractile ring	0	0
O	1832	GO:0070851	growth factor receptor binding	0	0
O	1833	GO:0070838	divalent metal ion transport	0	0
O	1834	GO:0070741	response to interleukin-6	0	0
O	1835	GO:0070723	response to cholesterol	0	0
O	1836	GO:0070665	positive regulation of leukocyte proliferation	0	0
O	1837	GO:0070664	negative regulation of leukocyte proliferation	0	0
O	1838	GO:0070661	leukocyte proliferation	0	0
O	1839	GO:0070585	protein localization to mitochondrion	0	0
O	1840	GO:0070555	response to interleukin-1	0	0
O	1841	GO:0070542	response to fatty acid	0	0
O	1842	GO:0070528	protein kinase C signaling	0	0
O	1843	GO:0070509	calcium ion import	0	0
O	1844	GO:0070371	ERK1 and ERK2 cascade	0	0
O	1845	GO:0070304	positive regulation of stress-activated protein kinase signaling cascade	0	0
O	1846	GO:0070303	negative regulation of stress-activated protein kinase signaling cascade	0	0
O	1847	GO:0070302	regulation of stress-activated protein kinase signaling cascade	0	0
O	1848	GO:0070301	cellular response to hydrogen peroxide	0	0
O	1849	GO:0070293	renal absorption	0	0
O	1850	GO:0070268	cornification	0	0
O	1851	GO:0070266	necroptotic process	0	0
O	1852	GO:0070252	actin-mediated cell contraction	0	0
O	1853	GO:0070229	negative regulation of lymphocyte apoptotic process	0	0
O	1854	GO:0070169	positive regulation of biomineral tissue development	0	0
O	1855	GO:0070168	negative regulation of biomineral tissue development	0	0
O	1856	GO:0070160	occluding junction	0	0
O	1857	GO:0065005	protein-lipid complex assembly	0	0
O	1858	GO:0061842	microtubule organizing center localization	0	0
O	1859	GO:0061702	inflammasome complex	0	0
O	1860	GO:0061640	cytoskeleton-dependent cytokinesis	0	0
O	1861	GO:0061515	myeloid cell development	0	0
O	1862	GO:0061462	protein localization to lysosome	0	0
O	1863	GO:0061339	establishment or maintenance of monopolar cell polarity	0	0
O	1864	GO:0061217	regulation of mesonephros development	0	0
O	1865	GO:0061162	establishment of monopolar cell polarity	0	0
O	1866	GO:0061136	regulation of proteasomal protein catabolic process	0	0
O	1867	GO:0061098	positive regulation of protein tyrosine kinase activity	0	0
O	1868	GO:0061097	regulation of protein tyrosine kinase activity	0	0
O	1869	GO:0061081	positive regulation of myeloid leukocyte cytokine production involved in immune response	0	0
O	1870	GO:0061077	chaperone-mediated protein folding	0	0
O	1871	GO:0061037	negative regulation of cartilage development	0	0
O	1872	GO:0061035	regulation of cartilage development	0	0
O	1873	GO:0061028	establishment of endothelial barrier	0	0
O	1874	GO:0061014	positive regulation of mRNA catabolic process	0	0
O	1875	GO:0061013	regulation of mRNA catabolic process	0	0
O	1876	GO:0060562	epithelial tube morphogenesis	0	0
O	1877	GO:0060491	regulation of cell projection assembly	0	0
O	1878	GO:0060457	negative regulation of digestive system process	0	0
O	1879	GO:0060441	epithelial tube branching involved in lung morphogenesis	0	0
O	1880	GO:0060402	calcium ion transport into cytosol	0	0
O	1881	GO:0060395	SMAD protein signal transduction	0	0
O	1882	GO:0060325	face morphogenesis	0	0
O	1883	GO:0060253	negative regulation of glial cell proliferation	0	0
O	1884	GO:0060252	positive regulation of glial cell proliferation	0	0
O	1885	GO:0060251	regulation of glial cell proliferation	0	0
O	1886	GO:0060193	positive regulation of lipase activity	0	0
O	1887	GO:0060081	membrane hyperpolarization	0	0
O	1888	GO:0060055	angiogenesis involved in wound healing	0	0
O	1889	GO:0060021	palate development	0	0
O	1890	GO:0055092	sterol homeostasis	0	0
O	1891	GO:0055088	lipid homeostasis	0	0
O	1892	GO:0055081	anion homeostasis	0	0
O	1893	GO:0055078	sodium ion homeostasis	0	0
O	1894	GO:0055076	transition metal ion homeostasis	0	0
O	1895	GO:0055070	copper ion homeostasis	0	0
O	1896	GO:0055067	monovalent inorganic cation homeostasis	0	0
O	1897	GO:0055001	muscle cell development	0	0
O	1898	GO:0051969	regulation of transmission of nerve impulse	0	0
O	1899	GO:0051968	positive regulation of synaptic transmission, glutamatergic	0	0
O	1900	GO:0051966	regulation of synaptic transmission, glutamatergic	0	0
O	1901	GO:0051962	positive regulation of nervous system development	0	0
O	1902	GO:0051957	positive regulation of amino acid transport	0	0
O	1903	GO:0051954	positive regulation of amine transport	0	0
O	1904	GO:0051900	regulation of mitochondrial depolarization	0	0
O	1905	GO:0051899	membrane depolarization	0	0
O	1906	GO:0051895	negative regulation of focal adhesion assembly	0	0
O	1907	GO:0051861	glycolipid binding	0	0
O	1908	GO:0051828	entry into other organism involved in symbiotic interaction	0	0
O	1909	GO:0051817	modification of morphology or physiology of other organism involved in symbiotic interaction	0	0
O	1910	GO:0051806	entry into cell of other organism involved in symbiotic interaction	0	0
O	1911	GO:0051783	regulation of nuclear division	0	0
O	1912	GO:0051782	negative regulation of cell division	0	0
O	1913	GO:0051781	positive regulation of cell division	0	0
O	1914	GO:0051775	response to redox state	0	0
O	1915	GO:0051770	positive regulation of nitric-oxide synthase biosynthetic process	0	0
O	1916	GO:0051769	regulation of nitric-oxide synthase biosynthetic process	0	0
O	1917	GO:0051764	actin crosslink formation	0	0
O	1918	GO:0051701	interaction with host	0	0
O	1919	GO:0051693	actin filament capping	0	0
O	1920	GO:0051668	localization within membrane	0	0
O	1921	GO:0051656	establishment of organelle localization	0	0
O	1922	GO:0051647	nucleus localization	0	0
O	1923	GO:0051642	centrosome localization	0	0
O	1924	GO:0051640	organelle localization	0	0
O	1925	GO:0051602	response to electrical stimulus	0	0
O	1926	GO:0051591	response to cAMP	0	0
O	1927	GO:0051495	positive regulation of cytoskeleton organization	0	0
O	1928	GO:0051494	negative regulation of cytoskeleton organization	0	0
O	1929	GO:0051491	positive regulation of filopodium assembly	0	0
O	1930	GO:0051489	regulation of filopodium assembly	0	0
O	1931	GO:0051457	maintenance of protein location in nucleus	0	0
O	1932	GO:0051412	response to corticosterone	0	0
O	1933	GO:0051403	stress-activated MAPK cascade	0	0
O	1934	GO:0051385	response to mineralocorticoid	0	0
O	1935	GO:0051353	positive regulation of oxidoreductase activity	0	0
O	1936	GO:0051321	meiotic cell cycle	0	0
O	1937	GO:0051283	negative regulation of sequestering of calcium ion	0	0
O	1938	GO:0051282	regulation of sequestering of calcium ion	0	0
O	1939	GO:0051279	regulation of release of sequestered calcium ion into cytosol	0	0
O	1940	GO:0051258	protein polymerization	0	0
O	1941	GO:0051220	cytoplasmic sequestering of protein	0	0
O	1942	GO:0051216	cartilage development	0	0
O	1943	GO:0051209	release of sequestered calcium ion into cytosol	0	0
O	1944	GO:0051188	cofactor biosynthetic process	0	0
O	1945	GO:0051099	positive regulation of binding	0	0
O	1946	GO:0051087	chaperone binding	0	0
O	1947	GO:0051082	unfolded protein binding	0	0
O	1948	GO:0051059	NF-kappaB binding	0	0
O	1949	GO:0051054	positive regulation of DNA metabolic process	0	0
O	1950	GO:0051024	positive regulation of immunoglobulin secretion	0	0
O	1951	GO:0051016	barbed-end actin filament capping	0	0
O	1952	GO:0050998	nitric-oxide synthase binding	0	0
O	1953	GO:0050953	sensory perception of light stimulus	0	0
O	1954	GO:0050927	positive regulation of positive chemotaxis	0	0
O	1955	GO:0050926	regulation of positive chemotaxis	0	0
O	1956	GO:0050922	negative regulation of chemotaxis	0	0
O	1957	GO:0050918	positive chemotaxis	0	0
O	1958	GO:0050892	intestinal absorption	0	0
O	1959	GO:0050890	cognition	0	0
O	1960	GO:0050873	brown fat cell differentiation	0	0
O	1961	GO:0050866	negative regulation of cell activation	0	0
O	1962	GO:0050864	regulation of B cell activation	0	0
O	1963	GO:0050860	negative regulation of T cell receptor signaling pathway	0	0
O	1964	GO:0050858	negative regulation of antigen receptor-mediated signaling pathway	0	0
O	1965	GO:0050857	positive regulation of antigen receptor-mediated signaling pathway	0	0
O	1966	GO:0050856	regulation of T cell receptor signaling pathway	0	0
O	1967	GO:0050854	regulation of antigen receptor-mediated signaling pathway	0	0
O	1968	GO:0050850	positive regulation of calcium-mediated signaling	0	0
O	1969	GO:0050849	negative regulation of calcium-mediated signaling	0	0
O	1970	GO:0050840	extracellular matrix binding	0	0
O	1971	GO:0050830	defense response to Gram-positive bacterium	0	0
O	1972	GO:0050829	defense response to Gram-negative bacterium	0	0
O	1973	GO:0050821	protein stabilization	0	0
O	1974	GO:0050819	negative regulation of coagulation	0	0
O	1975	GO:0050804	modulation of synaptic transmission	0	0
O	1976	GO:0050796	regulation of insulin secretion	0	0
O	1977	GO:0050728	negative regulation of inflammatory response	0	0
O	1978	GO:0050718	positive regulation of interleukin-1 beta secretion	0	0
O	1979	GO:0050716	positive regulation of interleukin-1 secretion	0	0
O	1980	GO:0050710	negative regulation of cytokine secretion	0	0
O	1981	GO:0050706	regulation of interleukin-1 beta secretion	0	0
O	1982	GO:0050704	regulation of interleukin-1 secretion	0	0
O	1983	GO:0050699	WW domain binding	0	0
O	1984	GO:0050690	regulation of defense response to virus by virus	0	0
O	1985	GO:0050688	regulation of defense response to virus	0	0
O	1986	GO:0050678	regulation of epithelial cell proliferation	0	0
O	1987	GO:0050672	negative regulation of lymphocyte proliferation	0	0
O	1988	GO:0050671	positive regulation of lymphocyte proliferation	0	0
O	1989	GO:0050667	homocysteine metabolic process	0	0
O	1990	GO:0050664	oxidoreductase activity, acting on NAD(P)H, oxygen as acceptor	0	0
O	1991	GO:0050660	flavin adenine dinucleotide binding	0	0
O	1992	GO:0050431	transforming growth factor beta binding	0	0
O	1993	GO:0048864	stem cell development	0	0
O	1994	GO:0048857	neural nucleus development	0	0
O	1995	GO:0048754	branching morphogenesis of an epithelial tube	0	0
O	1996	GO:0048714	positive regulation of oligodendrocyte differentiation	0	0
O	1997	GO:0048713	regulation of oligodendrocyte differentiation	0	0
O	1998	GO:0048708	astrocyte differentiation	0	0
[truncated: 1,024 more rows]

## Sheet: BrainUnder
Table S22. Random Forest results ranking GO terms by their ability to predict a gene being classified as underexpressed in the brain analysis.
Expression	Rank	GO ID	GO term	Probability	Precision
U	1	GO:0042577	lipid phosphatase activity	0.1515	3.4667
U	2	GO:0008195	phosphatidate phosphatase activity	0.1001	3
U	3	GO:0060174	limb bud formation	0.0736	0.5172
U	4	GO:0003207	cardiac chamber formation	0.0639	0.7143
U	5	GO:0001838	embryonic epithelial tube formation	0.0602	0.6538
U	6	GO:0021782	glial cell development	0.0489	0.3636
U	7	GO:0060563	neuroepithelial cell differentiation	0.0455	0.6786
U	8	GO:0021510	spinal cord development	0.0425	0.75
U	9	GO:0046839	phospholipid dephosphorylation	0.0373	2.6333
U	10	GO:0010817	regulation of hormone levels	0.0348	0.5
U	11	GO:0022607	cellular component assembly	0.0336	0.1111
U	12	GO:0072175	epithelial tube formation	0.0316	0.3462
U	13	GO:0060412	ventricular septum morphogenesis	0.0314	0.3929
U	14	GO:0048485	sympathetic nervous system development	0.0298	0.2667
U	15	GO:0010977	negative regulation of neuron projection development	0.0228	4.7333
U	16	GO:0008285	negative regulation of cell proliferation	0.0189	0.3333
U	17	GO:0048513	animal organ development	0.0188	0.3333
U	18	GO:0030426	growth cone	0.0184	4.3333
U	19	GO:0002065	columnar/cuboidal epithelial cell differentiation	0.0184	0.3929
U	20	GO:0031345	negative regulation of cell projection organization	0.0173	4.9333
U	21	GO:0030427	site of polarized growth	0.0168	3.3793
U	22	GO:0051173	positive regulation of nitrogen compound metabolic process	0.0167	0.0769
U	23	GO:0045665	negative regulation of neuron differentiation	0.0159	5.0333
U	24	GO:0001105	RNA polymerase II transcription coactivator activity	0.0158	0.4815
U	25	GO:0010721	negative regulation of cell development	0.015	8.2333
U	26	GO:0098811	transcriptional repressor activity, RNA polymerase II activating transcription factor binding	0.0149	0.5185
U	27	GO:0008038	neuron recognition	0.0145	0.7667
U	28	GO:0050768	negative regulation of neurogenesis	0.0143	6.8667
U	29	GO:0014069	postsynaptic density	0.0142	4.6667
U	30	GO:0046887	positive regulation of hormone secretion	0.0139	0.3333
U	31	GO:0000976	transcription regulatory region sequence-specific DNA binding	0.0136	0.3077
U	32	GO:0051100	negative regulation of binding	0.0135	0.6333
U	33	GO:0051961	negative regulation of nervous system development	0.0131	8.2333
U	34	GO:0045935	positive regulation of nucleobase-containing compound metabolic process	0.0127	0.25
U	35	GO:0099572	postsynaptic specialization	0.0122	4
U	36	GO:0071674	mononuclear cell migration	0.0122	0.4828
U	37	GO:0032774	RNA biosynthetic process	0.0117	1
U	38	GO:0060411	cardiac septum morphogenesis	0.0117	0.3929
U	39	GO:0010975	regulation of neuron projection development	0.0108	9.0667
U	40	GO:0002548	monocyte chemotaxis	0.0106	0.3571
U	41	GO:0045664	regulation of neuron differentiation	0.0087	13.2333
U	42	GO:0010628	positive regulation of gene expression	0.0086	0.3333
U	43	GO:0007409	axonogenesis	0.0085	1.1667
U	44	GO:0007399	nervous system development	0.0082	9.6667
U	45	GO:0016791	phosphatase activity	0.0082	4
U	46	GO:0016311	dephosphorylation	0.008	4.3667
U	47	GO:0001190	transcriptional activator activity, RNA polymerase II transcription factor binding	0.0078	0.2692
U	48	GO:0097485	neuron projection guidance	0.0077	1.4667
U	49	GO:0032990	cell part morphogenesis	0.0073	1.2
U	50	GO:0043197	dendritic spine	0.0073	0.45
U	51	GO:0048306	calcium-dependent protein binding	0.0071	0.3448
U	52	GO:0048731	system development	0.007	18.8333
U	53	GO:0045596	negative regulation of cell differentiation	0.007	4.5667
U	54	GO:0050767	regulation of neurogenesis	0.0068	11.1
U	55	GO:0030258	lipid modification	0.0067	2.1
U	56	GO:0048858	cell projection morphogenesis	0.0067	1.1667
U	57	GO:0048812	neuron projection morphogenesis	0.0063	1.4667
U	58	GO:0007411	axon guidance	0.0062	1.2667
U	59	GO:0031344	regulation of cell projection organization	0.0059	7.3667
U	60	GO:1903828	negative regulation of cellular protein localization	0.0059	0.0741
U	61	GO:0060284	regulation of cell development	0.0057	9.6333
U	62	GO:0042578	phosphoric ester hydrolase activity	0.0057	3.3333
U	63	GO:0030424	axon	0.0057	1.0385
U	64	GO:0001501	skeletal system development	0.0057	0.2857
U	65	GO:0018210	peptidyl-threonine modification	0.0057	0.2759
U	66	GO:0050771	negative regulation of axonogenesis	0.0056	0.16
[truncated: 1,030 more rows]

## Sheet: HeartOver
Table S23. Random Forest results ranking GO terms by their ability to predict a gene being classified as overexpressed in the heart analysis.
[truncated: 1,586 more rows]

[truncated: 3 more sheets: HeartUnder, MuscleOver, MuscleUnder]
